# Supplementary material for: Genome Sequencing and Analysis of the Peanut B-Genome Progenitor (Arachis ipaensis)
Source: Front Plant Sci. 2018 May 3;9:604. doi: 10.3389/fpls.2018.00604 (PMC5943715; doi:10.3389/fpls.2018.00604)
Supplement: Supplementary File 5: Data S4 — Detils on the 1,437 putative disease resistance genes in A. ipaensis. [file Data_Sheet_5.XLSX]

## Sheet: Sheet2
Data S4. Detils on the 1,437 putative disease resistance genes in A. ipaensis.
Gene_ID	Position	Start	End	Strand	Interproscan	KEGG	PRG database ID	Name	Type	Species	Class	Description	E-value	Number of disease resistance gene on each scaffold
XP_003518609.1	scaffold9206	82697	83836	+	Mitochondrial carrier protein;Mitochondrial carrier protein signature	POPTRDRAFT_559351; mitochondrial substrate carrier family protein; K15111 solute carrier family 25 (mitochondrial S-adenosylmethionine transporter), member 26	PRGDB00216316	MDP0000248430	Putative_R-Genes,_predicted_from_Pythozome	Malus x domestica	N	--	3.27e-178	10
XP_004514689.1-D2	scaffold9206	335992	344561	+	5'-3' exonuclease, N-terminal resolvase-like domain;Leucine rich repeat;Leucine Rich Repeat;Leucine-rich repeat signature;Protein kinase domain	Leucine-rich receptor-like protein kinase family protein; K13415 protein brassinosteroid insensitive 1 [EC:2.7.10.1 2.7.11.1]	PRGDB00164299	Glyma16g27260.1	Putative_R-Genes,_predicted_from_Pythozome	Glycine max	RLP	leucine-rich repeat transmembrane protein kinase family protein (best arabidopsis hit)	0	10
NP_174809.1-D113	scaffold9206	336064	339180	+	Leucine rich repeat;Leucine Rich Repeat;Leucine rich repeat N-terminal domain;Leucine-rich repeat signature;Protein kinase domain	HAESA-like 1 isoform 1; K00924	PRGDB00164299	Glyma16g27260.1	Putative_R-Genes,_predicted_from_Pythozome	Glycine max	RLP	leucine-rich repeat transmembrane protein kinase family protein (best arabidopsis hit)	0	10
XP_008393812.1-D439	scaffold9206	453155	459459	-	Cellulase (glycosyl hydrolase family 5);Leucine rich repeat;Leucine Rich Repeat;Leucine rich repeat N-terminal domain	probable LRR receptor-like serine/threonine-protein kinase At3g47570-like; K13420 LRR receptor-like serine/threonine-protein kinase FLS2 [EC:2.7.11.1]	PRGWK00000128	MELO3C008095	Contributed_R-Genes	Cucumis melo	RLP	--	0	10
XP_003535621.1-D8	scaffold9206	500501	504082	+	Leucine rich repeat;Leucine Rich Repeat;Leucine rich repeat N-terminal domain;Leucine-rich repeat signature;Protein kinase domain	systemin receptor SR160; K13415 protein brassinosteroid insensitive 1 [EC:2.7.10.1 2.7.11.1]	PRGDB00148300	clementine0.9_000660m	Putative_R-Genes,_predicted_from_Pythozome	Citrus clementina	RLP	BRI1 like (best arabidopsis hit)	0	10
XP_007148670.1	scaffold9206	527889	530879	-	NB-ARC domain	-	PRGDB00062406	tir-nbs resistance protein	Putative_R-Genes,_collected_from_NCBI_Protein	Populus trichocarpa	N	Populus trichocarpa linkage group I, whole genome shotgun sequence.	0	10
XP_003527575.1	scaffold9206	592718	597666	-	-	KH domain-containing protein At5g56140-like; K14945 protein quaking	PRGDB00213184	MDP0000285888	Putative_R-Genes,_predicted_from_Pythozome	Malus x domestica	CNL	--	3.28e-53	10
XP_008363533.1	scaffold9206	600285	602982	-	Protein kinase domain	serine/threonine protein kinase, putative (EC:2.7.11.1); K08286 protein-serine/threonine kinase [EC:2.7.11.-]	PRGDB00216033	MDP0000314577	Putative_R-Genes,_predicted_from_Pythozome	Malus x domestica	RLP	--	1.6e-62	10
NP_193747.2-D279	scaffold9206	632374	635136	-	Leucine rich repeat;Leucine Rich Repeat;Leucine-rich repeat signature;Protein tyrosine kinase	Kinase family protein with leucine-rich repeat domain, putative; K00924	PRGDB00163306	Glyma14g08120.1	Putative_R-Genes,_predicted_from_Pythozome	Glycine max	RLP	Leucine-rich repeat protein kinase family protein (best arabidopsis hit)	3.39e-69	10
XP_003549433.1-D24	scaffold9206	632568	635136	-	Leucine rich repeat;Leucine Rich Repeat;Leucine-rich repeat signature;Protein tyrosine kinase;Putative S-adenosyl-L-methionine-dependent methyltransferase	hypothetical protein; K15449 tRNA wybutosine-synthesizing protein 1 [EC:4.1.3.44]	PRGDB00163306	Glyma14g08120.1	Putative_R-Genes,_predicted_from_Pythozome	Glycine max	RLP	Leucine-rich repeat protein kinase family protein (best arabidopsis hit)	5.77e-68	10
XP_008348689.1-D1071	scaffold8701	373783	374115	+	-	uncharacterized LOC103342269; K10395 kinesin family member 4/21/27	PRGDB00061511	disease resistance protein	Putative_R-Genes,_collected_from_NCBI_Protein	Brassica rapa subsp. pekinensis	TNL	Brassica rapa subsp. pekinensis isolate BrTNL10 disease resistance protein gene, complete cds.	2.33e-40	10
XP_012572330.1-D2	scaffold8701	430935	437261	-	Di-glucose binding within endoplasmic reticulum;Leucine rich repeat;Protein tyrosine kinase	hypothetical protein; K04733 interleukin-1 receptor-associated kinase 4 [EC:2.7.11.1]	PRGDB00196138	Phvulv091025551m	Putative_R-Genes,_predicted_from_Pythozome	Phaseolus vulgaris	RLP	--	0	10
XP_007159480.1	scaffold8701	596146	596970	-	WRKY DNA -binding domain	WRKY transcription factor 22-like; K13425 WRKY transcription factor 22	PRGDB00075438	Pth.16063	Putative_R-Genes,_predicted_from_NCBI_UniGene	Populus trichocarpa	TNL	Populus trichocarpa clone 196822 TIR-NBS-TIR-TIR-WRKY type disease resistance protein mRNA, complete cds	6.81e-33	10
XP_003552905.1-D315	scaffold8701	718587	718997	+	Leucine rich repeat;Leucine-rich repeat signature	hypothetical protein; K04730 interleukin-1 receptor-associated kinase 1 [EC:2.7.11.1]	PRGDB00067980	Ccl.11992	Putative_R-Genes,_predicted_from_NCBI_UniGene	Citrus clementina	RLP	IC0AAA35CC06RM2 CitNFL Citrus clementina cDNA 5', mRNA sequence	5.65e-64	10
XP_007136978.1-D3	scaffold8701	729453	732838	-	Protein kinase domain	shaggy-related protein kinase eta-like; K14502 protein brassinosteroid insensitive 2 [EC:2.7.11.1]	PRGDB00215771	MDP0000180284	Putative_R-Genes,_predicted_from_Pythozome	Malus x domestica	RLP	--	0	10
XP_007149541.1-D383	scaffold8701	750052	750495	-	Protein tyrosine kinase	probable LRR receptor-like serine/threonine-protein kinase At2g24230; K04730 interleukin-1 receptor-associated kinase 1 [EC:2.7.11.1]	PRGDB00196143	Phvulv091030913m	Putative_R-Genes,_predicted_from_Pythozome	Phaseolus vulgaris	RLP	--	1.28e-82	10
XP_014631185.1-D2	scaffold8701	789544	793389	-	Leucine rich repeat N-terminal domain;Protein tyrosine kinase	probable inactive receptor-like protein kinase At3g56050; K04733 interleukin-1 receptor-associated kinase 4 [EC:2.7.11.1]	PRGDB00196145	Phvulv091030912m	Putative_R-Genes,_predicted_from_Pythozome	Phaseolus vulgaris	RLP	--	0	10
XP_002522583.1-D5	scaffold8701	828202	828669	-	Protein of unknown function (DUF640)	-	PRGDB00155469	orange1.1g000354m	Putative_R-Genes,_predicted_from_Pythozome	Citrus sinensis	CNL	NB-ARC domain-containing disease resistance protein (best arabidopsis hit)	1.3e-74	10
XP_014634373.1	scaffold8701	973763	980295	-	Protein kinase domain	hypothetical protein; K04371 mitogen-activated protein kinase 1/3 [EC:2.7.11.24]	PRGDB00147216	Bradi4g24910.1	Putative_R-Genes,_predicted_from_Pythozome	Ricinus communis	RLP	mitogen-activated protein kinase 1 (best arabidopsis hit); CGMC_MAPKCMGC_2_SLT2y_ERK.2 - CGMC includes CDA, MAPK, GSK3, and CLKC kinases, expressed (best rice hit)	0	10
XP_004504314.1	scaffold8701	992277	999579	-	HEAT repeat;HEAT repeats	kinesin-related protein 11-like; K11498 centromeric protein E	PRGDB00184310	GSVIVT01034283001	Putative_R-Genes,_predicted_from_Pythozome	Vitis vinifera	NL	receptor like protein 14 (best arabidopsis hit)	4.87e-71	10
XP_014632591.1-D8	scaffold19118	23297	51429	-	Disease resistance protein signature;NB-ARC domain	putative disease resistance RPP13-like protein 3-like; K13457 disease resistance protein RPM1	PRGDB00163545	Glyma14g37860.1	Putative_R-Genes,_predicted_from_Pythozome	Glycine max	CNL	NB-ARC domain-containing disease resistance protein (best arabidopsis hit)	7.44e-35	8
XP_002533108.1-D5	scaffold19118	101033	102629	-	Ras family;Transforming protein P21 ras signature	ras-related protein RABE1c-like; K07901 Ras-related protein Rab-8A	PRGDB00202169	Bra007015	Putative_R-Genes,_predicted_from_Pythozome	Brassica rapa	RLP	--	2.16e-112	8
XP_002527736.1-D13	scaffold19118	164027	166226	+	70kDa heat shock protein signature;Hsp70 protein	Os05g0460000; Similar to 70 kDa heat shock cognate protein 1.; K03283 heat shock 70kDa protein 1/8; K06758 L1 cell adhesion molecule like protein	PRGDB00167710	Medtr2g047020.1	Putative_R-Genes,_predicted_from_Pythozome	Medicago truncatula	TNL	heat shock cognate protein 70-1 (best arabidopsis hit)	4.16e-161	8
XP_007162654.1	scaffold19118	218037	220580	+	70kDa heat shock protein signature;Hsp70 protein	heat shock cognate 70 kDa protein 2-like; K03283 heat shock 70kDa protein 1/8; K06758 L1 cell adhesion molecule like protein	PRGDB00167710	Medtr2g047020.1	Putative_R-Genes,_predicted_from_Pythozome	Medicago truncatula	TNL	heat shock cognate protein 70-1 (best arabidopsis hit)	0	8
XP_007148569.1-D13	scaffold19118	237040	239574	-	70kDa heat shock protein signature;Hsp70 protein	heat shock cognate 70 kDa protein 2-like; K03283 heat shock 70kDa protein 1/8; K06758 L1 cell adhesion molecule like protein	PRGDB00167710	Medtr2g047020.1	Putative_R-Genes,_predicted_from_Pythozome	Medicago truncatula	TNL	heat shock cognate protein 70-1 (best arabidopsis hit)	0	8
XP_002532297.1-D19	scaffold19118	296063	298093	-	70kDa heat shock protein signature;Hsp70 protein	probable mediator of RNA polymerase II transcription subunit 37c-like; K03283 heat shock 70kDa protein 1/8; K06758 L1 cell adhesion molecule like protein	PRGDB00167710	Medtr2g047020.1	Putative_R-Genes,_predicted_from_Pythozome	Medicago truncatula	TNL	heat shock cognate protein 70-1 (best arabidopsis hit)	2.69e-171	8
XP_007139224.1-D23	scaffold19118	299531	301435	-	70kDa heat shock protein signature;Hsp70 protein	probable mediator of RNA polymerase II transcription subunit 37c-like; K03283 heat shock 70kDa protein 1/8; K06758 L1 cell adhesion molecule like protein	PRGDB00167710	Medtr2g047020.1	Putative_R-Genes,_predicted_from_Pythozome	Medicago truncatula	TNL	heat shock cognate protein 70-1 (best arabidopsis hit)	6.48e-173	8
XP_002532297.1-D30	scaffold19118	302641	304684	-	70kDa heat shock protein signature;Hsp70 protein	probable mediator of RNA polymerase II transcription subunit 37c-like; K03283 heat shock 70kDa protein 1/8; K06758 L1 cell adhesion molecule like protein	PRGDB00167710	Medtr2g047020.1	Putative_R-Genes,_predicted_from_Pythozome	Medicago truncatula	TNL	heat shock cognate protein 70-1 (best arabidopsis hit)	1.2e-173	8
XP_014628333.1	scaffold12534	7086	13020	+	Protein kinase domain;Protein phosphatase 2C	probable receptor-like protein kinase At1g67000; K04733 interleukin-1 receptor-associated kinase 4 [EC:2.7.11.1]	PRGDB00141957	AcoGoldSmith_v1.017924m	Putative_R-Genes,_predicted_from_Pythozome	Gossypium arboreum	RLP	Leucine-rich repeat receptor-like protein kinase family protein (best arabidopsis hit)	4.15e-141	7
XP_008371728.1-D94	scaffold12534	12046	12951	+	Protein kinase domain	probable receptor-like protein kinase At1g67000; K04733 interleukin-1 receptor-associated kinase 4 [EC:2.7.11.1]	PRGDB00165401	Glyma20g25240.1	Putative_R-Genes,_predicted_from_Pythozome	Glycine max	RLP	Protein kinase superfamily protein (best arabidopsis hit)	5.69e-152	7
NP_176863.2-D8	scaffold12534	19350	20258	-	Protein kinase domain	probable receptor-like protein kinase At1g67000; K04733 interleukin-1 receptor-associated kinase 4 [EC:2.7.11.1]	PRGDB00165401	Glyma20g25240.1	Putative_R-Genes,_predicted_from_Pythozome	Glycine max	RLP	Protein kinase superfamily protein (best arabidopsis hit)	5.86e-165	7
NP_172597.2-D103	scaffold12534	44954	45889	+	Protein kinase domain	probable receptor-like protein kinase At1g67000; K04733 interleukin-1 receptor-associated kinase 4 [EC:2.7.11.1]	PRGDB00165401	Glyma20g25240.1	Putative_R-Genes,_predicted_from_Pythozome	Glycine max	RLP	Protein kinase superfamily protein (best arabidopsis hit)	1.15e-168	7
XP_002528881.1-D73	scaffold12534	52709	53740	+	Protein kinase domain	probable receptor-like protein kinase At1g67000; K04733 interleukin-1 receptor-associated kinase 4 [EC:2.7.11.1]	PRGDB00165401	Glyma20g25240.1	Putative_R-Genes,_predicted_from_Pythozome	Glycine max	RLP	Protein kinase superfamily protein (best arabidopsis hit)	8.93e-174	7
NP_194047.2-D29	scaffold12534	54382	69193	-	Protein kinase domain;Reverse transcriptase (RNA-dependent DNA polymerase)	probable receptor-like protein kinase At1g67000; K04733 interleukin-1 receptor-associated kinase 4 [EC:2.7.11.1]	PRGDB00165401	Glyma20g25240.1	Putative_R-Genes,_predicted_from_Pythozome	Glycine max	RLP	Protein kinase superfamily protein (best arabidopsis hit)	1.59e-156	7
XP_012572486.1-D99	scaffold12534	63226	64143	+	Protein kinase domain	probable receptor-like protein kinase At1g67000; K04733 interleukin-1 receptor-associated kinase 4 [EC:2.7.11.1]	PRGDB00165401	Glyma20g25240.1	Putative_R-Genes,_predicted_from_Pythozome	Glycine max	RLP	Protein kinase superfamily protein (best arabidopsis hit)	4.5e-147	7
XP_007158363.1	scaffold8344	182173	187350	-	Protein tyrosine kinase;U-box domain	U-box domain-containing protein 33-like; K04730 interleukin-1 receptor-associated kinase 1 [EC:2.7.11.1]	PRGDB00155416	Glyma01g02780.1	Putative_R-Genes,_predicted_from_Pythozome	Glycine max	CN	U-box domain-containing protein kinase family protein (best arabidopsis hit)	0	6
XP_008363824.1-D38	scaffold8344	396349	398740	+	Legume lectin domain;Protein kinase domain	L-type lectin-domain containing receptor kinase IX.1-like; K04730 interleukin-1 receptor-associated kinase 1 [EC:2.7.11.1]	PRGDB00178233	Sb01g013650.1	Putative_R-Genes,_predicted_from_Pythozome	Sorghum bicolor	RLK-GNK2	Concanavalin A-like lectin protein kinase family protein (best arabidopsis hit); cysteine-rich receptor-like protein kinase 8 precursor, putative, expressed (best rice hit)	7.75e-92	6
XP_014623557.1	scaffold8344	418498	440568	+	Peptidase family M3;Serine hydroxymethyltransferase	probable cytosolic oligopeptidase A; K01414 oligopeptidase A [EC:3.4.24.70]	PRGDB00214085	MDP0000194411	Putative_R-Genes,_predicted_from_Pythozome	Malus x domestica	N	--	1.62e-56	6
XP_003534255.2-D2	scaffold8344	426184	438411	+	Peptidase family M3;Serine hydroxymethyltransferase	probable cytosolic oligopeptidase A; K01414 oligopeptidase A [EC:3.4.24.70]	PRGDB00214085	MDP0000194411	Putative_R-Genes,_predicted_from_Pythozome	Malus x domestica	N	--	1.18e-56	6
XP_007158329.1-D2	scaffold8344	441621	447887	-	Carbohydrate-binding protein of the ER;Leucine Rich Repeat;Leucine rich repeat N-terminal domain;Protein tyrosine kinase	nodulation receptor kinase-like; K04730 interleukin-1 receptor-associated kinase 1 [EC:2.7.11.1]	PRGDB00070373	Lja.17570	Putative_R-Genes,_predicted_from_NCBI_UniGene	Lotus japonicus	RLP	Lotus japonicus receptor-like kinase SYMRK mRNA, complete cds	0	6
XP_008393442.1-D2	scaffold8344	454996	458004	-	ABC-2 type transporter;ABC transporter	ppabcg12; ATP-binding cassette transporter, subfamily G, member 12, group WBC protein PpABCG12; K05681 ATP-binding cassette, subfamily G (WHITE), member 2	PRGDB00168558	Medtr5g032390.1	Putative_R-Genes,_predicted_from_Pythozome	Medicago truncatula	N	ABC-2 type transporter family protein (best arabidopsis hit)	0	6
XP_002529835.1-D4	scaffold154	172680	174219	-	Phytochelatin synthase	glutathione gamma-glutamylcysteinyltransferase 1; K05941 glutathione gamma-glutamylcysteinyltransferase [EC:2.3.2.15]	PRGDB00214578	MDP0000311735	Putative_R-Genes,_predicted_from_Pythozome	Malus x domestica	CNL	--	2.16e-29	6
XP_007131519.1	scaffold154	316568	318025	-	Tim17/Tim22/Tim23/Pmp24 family	hypothetical protein; K17790 mitochondrial import inner membrane translocase subunit TIM22	PRGDB00216830	MDP0000267389	Putative_R-Genes,_predicted_from_Pythozome	Malus x domestica	CN	--	7.46e-37	6
XP_006591996.1-D6	scaffold154	323253	331509	-	Disease resistance protein signature;NB-ARC domain	putative disease resistance RPP13-like protein 3-like; K13457 disease resistance protein RPM1	PRGDB00187645	Gma.63972	Putative_R-Genes,_predicted_from_NCBI_UniGene	Glycine max	CNL	Glycine max cDNA, clone: GMFL01-47-F18	0	6
XP_014632591.1-D4	scaffold154	336860	352185	-	Disease resistance protein signature;NB-ARC domain	putative disease resistance RPP13-like protein 3-like; K13457 disease resistance protein RPM1	PRGDB00187645	Gma.63972	Putative_R-Genes,_predicted_from_NCBI_UniGene	Glycine max	CNL	Glycine max cDNA, clone: GMFL01-47-F18	0	6
XP_014632591.1-D6	scaffold154	415837	444624	-	Disease resistance protein signature;NB-ARC domain	putative disease resistance RPP13-like protein 3-like; K13457 disease resistance protein RPM1	PRGDB00196728	Phvulv091016937m	Putative_R-Genes,_predicted_from_Pythozome	Phaseolus vulgaris	CNL	--	0	6
XP_002524239.1-D7	scaffold154	462245	465034	-	Disease resistance protein signature;NB-ARC domain	putative disease resistance RPP13-like protein 3-like; K13457 disease resistance protein RPM1	PRGDB00187645	Gma.63972	Putative_R-Genes,_predicted_from_NCBI_UniGene	Glycine max	CNL	Glycine max cDNA, clone: GMFL01-47-F18	0	6
XP_008390320.1-D17	scaffold7990	7563	9551	-	70kDa heat shock protein signature;Hsp70 protein	probable mediator of RNA polymerase II transcription subunit 37c-like; K03283 heat shock 70kDa protein 1/8; K06758 L1 cell adhesion molecule like protein	PRGDB00167710	Medtr2g047020.1	Putative_R-Genes,_predicted_from_Pythozome	Medicago truncatula	TNL	heat shock cognate protein 70-1 (best arabidopsis hit)	0	5
XP_004516059.1-D15	scaffold7990	17007	19214	-	70kDa heat shock protein signature;Hsp70 protein	Heat shock protein; K03283 heat shock 70kDa protein 1/8; K06758 L1 cell adhesion molecule like protein	PRGDB00167710	Medtr2g047020.1	Putative_R-Genes,_predicted_from_Pythozome	Medicago truncatula	TNL	heat shock cognate protein 70-1 (best arabidopsis hit)	0	5
XP_002532297.1-D22	scaffold7990	20774	22957	-	70kDa heat shock protein signature;Hsp70 protein	heat shock cognate 70 kDa protein-like; K03283 heat shock 70kDa protein 1/8; K06758 L1 cell adhesion molecule like protein	PRGDB00167710	Medtr2g047020.1	Putative_R-Genes,_predicted_from_Pythozome	Medicago truncatula	TNL	heat shock cognate protein 70-1 (best arabidopsis hit)	5.55e-170	5
XP_002532297.1-D15	scaffold7990	23388	25351	+	70kDa heat shock protein signature;Hsp70 protein	probable mediator of RNA polymerase II transcription subunit 37c-like; K03283 heat shock 70kDa protein 1/8; K06758 L1 cell adhesion molecule like protein	PRGDB00167710	Medtr2g047020.1	Putative_R-Genes,_predicted_from_Pythozome	Medicago truncatula	TNL	heat shock cognate protein 70-1 (best arabidopsis hit)	6.02e-174	5
XP_003552701.2-D3	scaffold7990	81785	84885	-	Disease resistance protein signature;NB-ARC domain	putative disease resistance RPP13-like protein 3-like; K13457 disease resistance protein RPM1	PRGDB00160081	Glyma08g29050.3	Putative_R-Genes,_predicted_from_Pythozome	Glycine max	CNL	NB-ARC domain-containing disease resistance protein (best arabidopsis hit)	0	5
XP_007134291.1	scaffold7332	7535	19209	+	-	-	PRGDB00062233	Disease resistance protein RPS5, putative	Putative_R-Genes,_collected_from_NCBI_Protein	Ricinus communis	NL	Ricinus communis Disease resistance protein RPS5, putative, mRNA.	1.74e-79	5
XP_007134284.1-D2	scaffold7332	67866	74834	-	Mlo family	MLO-like protein 1-like; K08472 mlo protein	PRGDB00164204	Glyma16g08900.1	Putative_R-Genes,_predicted_from_Pythozome	Glycine max	Mlo-like	Seven transmembrane MLO family protein (best arabidopsis hit)	0	5
XP_007134284.1-D3	scaffold7332	94521	98872	+	Mlo family	MLO-like protein 1; K08472 mlo protein	PRGDB00188647	Gma.30574	Putative_R-Genes,_predicted_from_NCBI_UniGene	Glycine max	Mlo-like	PREDICTED: Glycine max MLO-like protein 1-like (LOC100811793), mRNA	0	5
XP_004502151.1-D4	scaffold7332	310001	313522	-	-	uncharacterized aarF domain-containing protein kinase At1g79600, chloroplastic-like; K13457 disease resistance protein RPM1	PRGDB00078970	Vvi.20745	Putative_R-Genes,_predicted_from_NCBI_UniGene	Vitis vinifera	CNL	PREDICTED: Vitis vinifera hypothetical protein LOC100252764 (LOC100252764), mRNA	3.12e-35	5
XP_014619602.1-D6	scaffold7332	310569	313522	-	-	uncharacterized aarF domain-containing protein kinase At1g79600, chloroplastic-like; K13457 disease resistance protein RPM1	PRGDB00078970	Vvi.20745	Putative_R-Genes,_predicted_from_NCBI_UniGene	Vitis vinifera	CNL	PREDICTED: Vitis vinifera hypothetical protein LOC100252764 (LOC100252764), mRNA	5.37e-35	5
XP_004493999.2-D3	scaffold7281	2082	4647	+	70kDa heat shock protein signature;Hsp70 protein	HSP70; heat shock cognate 70 kDa protein-like; K03283 heat shock 70kDa protein 1/8; K06758 L1 cell adhesion molecule like protein	PRGDB00167710	Medtr2g047020.1	Putative_R-Genes,_predicted_from_Pythozome	Medicago truncatula	TNL	heat shock cognate protein 70-1 (best arabidopsis hit)	0	5
XP_003539679.1-D2	scaffold7281	39304	42063	-	Armadillo/beta-catenin-like repeat;Neurochondrin;U-box domain	U-box domain-containing protein 13-like; K08332 vacuolar protein 8	PRGDB00191296	Lsa.44031	Putative_R-Genes,_predicted_from_NCBI_UniGene	Lactuca sativa	N	TSA: Lactuca sativa CLC_LTR_V1A_17001 mRNA sequence	9.11e-118	5
XP_014623515.1	scaffold7281	79244	83703	+	Protein tyrosine kinase;U-box domain	U-box domain-containing protein 33-like; K04730 interleukin-1 receptor-associated kinase 1 [EC:2.7.11.1]	PRGDB00189061	Gma.61318	Putative_R-Genes,_predicted_from_NCBI_UniGene	Glycine max	CN	PREDICTED: Glycine max U-box domain-containing protein 33-like (LOC100799032), mRNA	0	5
NP_180459.2	scaffold7281	128450	130102	+	Protein tyrosine kinase	protein kinase APK1A, chloroplastic-like; K04733 interleukin-1 receptor-associated kinase 4 [EC:2.7.11.1]	PRGDB00207849	Aquca_027_00169.1	Putative_R-Genes,_predicted_from_Pythozome	Aquilegia coerulea	RLP	--	0	5
XP_008387694.1-D100	scaffold7281	358424	365101	-	PPR repeat;PPR repeat family;Surface antigen	pentatricopeptide repeat-containing protein, putative; K15271 ATP-dependent DNA helicase HFM1/MER3 [EC:3.6.4.12]	PRGDB00201131	Bra018196	Putative_R-Genes,_predicted_from_Pythozome	Brassica rapa	NL	--	0	5
XP_003534547.1	scaffold5610	30263	41358	+	RIC1	-	PRGDB00186676	--	Putative_R-Genes,_collected_from_NCBI_Protein	Arachis hypogaea	NL	Arachis hypogaea clone AHF-205D04 NBS-LRR gene cluster, complete sequence.	9.62e-74	5
XP_008354068.1-D40	scaffold5610	56298	64130	-	Endonuclease/Exonuclease/phosphatase family;Reverse transcriptase (RNA-dependent DNA polymerase)	60S ribosomal export protein NMD3; K07562 nonsense-mediated mRNA decay protein 3	PRGDB00186672	--	Putative_R-Genes,_collected_from_NCBI_Protein	Arachis hypogaea	NL	Arachis hypogaea clone AHF-205D04 NBS-LRR gene cluster, complete sequence.	0	5
XP_002513539.1-D7	scaffold5610	65282	142654	+	Disease resistance protein signature;NB-ARC domain;TIR domain	TMV resistance protein N-like; K19613 leucine-rich repeat protein SHOC2	PRGDB00186672	--	Putative_R-Genes,_collected_from_NCBI_Protein	Arachis hypogaea	NL	Arachis hypogaea clone AHF-205D04 NBS-LRR gene cluster, complete sequence.	1.85e-165	5
XP_012568090.1-D14	scaffold5610	148509	214840	+	Disease resistance protein signature;NB-ARC domain;TIR domain	TMV resistance protein N-like; K19613 leucine-rich repeat protein SHOC2	PRGDB00186671	--	Putative_R-Genes,_collected_from_NCBI_Protein	Arachis hypogaea	TNL	Arachis hypogaea clone AHF-205D04 NBS-LRR gene cluster, complete sequence.	0	5
XP_004492774.1-D11	scaffold5610	250411	254847	-	Disease resistance protein signature;NB-ARC domain;TIR domain	hypothetical protein; K19613 leucine-rich repeat protein SHOC2	PRGDB00186674	--	Putative_R-Genes,_collected_from_NCBI_Protein	Arachis hypogaea	NL	Arachis hypogaea clone AHF-205D04 NBS-LRR gene cluster, complete sequence.	0	5
NP_565052.1-D4	scaffold5089	154793	160880	+	70kDa heat shock protein signature;Hsp70 protein;Putative Phosphatase	probable mediator of RNA polymerase II transcription subunit 37c-like; K03283 heat shock 70kDa protein 1/8; K06758 L1 cell adhesion molecule like protein	PRGDB00167710	Medtr2g047020.1	Putative_R-Genes,_predicted_from_Pythozome	Medicago truncatula	TNL	heat shock cognate protein 70-1 (best arabidopsis hit)	5.91e-108	5
XP_002532297.1-D20	scaffold5089	154793	157128	+	70kDa heat shock protein signature;Hsp70 protein	probable mediator of RNA polymerase II transcription subunit 37c-like; K03283 heat shock 70kDa protein 1/8; K06758 L1 cell adhesion molecule like protein	PRGDB00167710	Medtr2g047020.1	Putative_R-Genes,_predicted_from_Pythozome	Medicago truncatula	TNL	heat shock cognate protein 70-1 (best arabidopsis hit)	1.15e-170	5
XP_006583723.1-D6	scaffold5089	178495	181317	+	70kDa heat shock protein signature;Hsp70 protein	probable mediator of RNA polymerase II transcription subunit 37c-like; K03283 heat shock 70kDa protein 1/8; K06758 L1 cell adhesion molecule like protein	PRGDB00167710	Medtr2g047020.1	Putative_R-Genes,_predicted_from_Pythozome	Medicago truncatula	TNL	heat shock cognate protein 70-1 (best arabidopsis hit)	0	5
XP_006583723.1-D4	scaffold5089	209362	211753	+	70kDa heat shock protein signature;Hsp70 protein	probable mediator of RNA polymerase II transcription subunit 37c-like; K03283 heat shock 70kDa protein 1/8; K06758 L1 cell adhesion molecule like protein	PRGDB00167710	Medtr2g047020.1	Putative_R-Genes,_predicted_from_Pythozome	Medicago truncatula	TNL	heat shock cognate protein 70-1 (best arabidopsis hit)	0	5
XP_006583723.1-D2	scaffold5089	216943	219646	+	70kDa heat shock protein signature;Hsp70 protein	probable mediator of RNA polymerase II transcription subunit 37c-like; K03283 heat shock 70kDa protein 1/8; K06758 L1 cell adhesion molecule like protein	PRGDB00167710	Medtr2g047020.1	Putative_R-Genes,_predicted_from_Pythozome	Medicago truncatula	TNL	heat shock cognate protein 70-1 (best arabidopsis hit)	0	5
XP_007149875.1-D7	scaffold4168	58104	59296	-	Protein phosphatase 2C	hypothetical protein; K10147 protein phosphatase 1D [EC:3.1.3.16]	PRGDB00200844	Bra008427	Putative_R-Genes,_predicted_from_Pythozome	Brassica rapa	RLP	--	2.67e-79	5
XP_004487690.1-D2	scaffold4168	89533	93257	-	Leucine rich repeat;Leucine rich repeats (6 copies);Papain family cysteine protease	hypothetical protein; K19613 leucine-rich repeat protein SHOC2	PRGWK00002101	Sotub10g007150.1.1	Contributed_R-Genes	Solanum tuberosum	RLP	--	1.47e-39	5
XP_002511277.1-D27	scaffold4168	89533	93297	-	Leucine rich repeat;Papain family cysteine protease	cysteine protease, putative (EC:1.3.1.74); K01365 cathepsin L [EC:3.4.22.15]	PRGWK00000962	Solyc10g006930.1.1	Contributed_R-Genes	Solanum lycopersicum	RLP	--	1.59e-103	5
XP_002521837.1-D3	scaffold4168	106468	111930	+	Protein kinase domain	serine/threonine-protein kinase SRK2I-like; K14498 serine/threonine-protein kinase SRK2 [EC:2.7.11.1]	PRGDB00189827	Hv.34453	Putative_R-Genes,_predicted_from_NCBI_UniGene	Hordeum vulgare	NL	Hordeum vulgare subsp. vulgare mRNA for predicted protein, complete cds, clone: NIASHv2106K13	5.95e-143	5
XP_004511973.1-D2	scaffold4168	112986	120047	-	Arabidopsis broad-spectrum mildew resistance protein RPW8;Disease resistance protein signature;NB-ARC domain	uncharacterized LOC103401427; K13415 protein brassinosteroid insensitive 1 [EC:2.7.10.1 2.7.11.1]	PRGDB00069155	Gma.36116	Putative_R-Genes,_predicted_from_NCBI_UniGene	Glycine max	CNL	gmrtDrNS01_04-A_M13R_D06_042.s1 Water stressed 5h segment 1 gmrtDrNS01 Glycine max cDNA 3', mRNA sequence	6.47e-90	5
XP_003518128.1	scaffold3204	4730	9518	+	Aminotransferase class I and II	long chain base biosynthesis protein 2a-like; K00654 serine palmitoyltransferase [EC:2.3.1.50]	PRGDB00216362	MDP0000301292	Putative_R-Genes,_predicted_from_Pythozome	Malus x domestica	RLP	--	1.62e-84	5
XP_007158959.1-D77	scaffold3204	52423	52764	+	Protein tyrosine kinase	probable LRR receptor-like serine/threonine-protein kinase At4g08850; K04733 interleukin-1 receptor-associated kinase 4 [EC:2.7.11.1]	PRGDB00156500	Glyma03g03170.1	Putative_R-Genes,_predicted_from_Pythozome	Glycine max	RLP	Protein kinase family protein with leucine-rich repeat domain (best arabidopsis hit)	6.44e-53	5
XP_008378530.1-D63	scaffold3204	58823	63705	+	Protein kinase domain	probable LRR receptor-like serine/threonine-protein kinase At4g08850-like; K04730 interleukin-1 receptor-associated kinase 1 [EC:2.7.11.1]	PRGDB00195067	Phvulv091024715m	Putative_R-Genes,_predicted_from_Pythozome	Phaseolus vulgaris	RLP	--	3.12e-78	5
XP_012570900.1-D50	scaffold3204	62854	63252	+	Protein kinase domain	hypothetical protein; K04730 interleukin-1 receptor-associated kinase 1 [EC:2.7.11.1]	PRGDB00156500	Glyma03g03170.1	Putative_R-Genes,_predicted_from_Pythozome	Glycine max	RLP	Protein kinase family protein with leucine-rich repeat domain (best arabidopsis hit)	5.26e-64	5
XP_014624135.1-D30	scaffold3204	111514	112540	+	Protein kinase domain	probable LRR receptor-like serine/threonine-protein kinase At4g08850; K04733 interleukin-1 receptor-associated kinase 4 [EC:2.7.11.1]	PRGDB00156500	Glyma03g03170.1	Putative_R-Genes,_predicted_from_Pythozome	Glycine max	RLP	Protein kinase family protein with leucine-rich repeat domain (best arabidopsis hit)	1.04e-150	5
XP_003527101.1	scaffold2918	76983	80839	-	Leucine rich repeat	hypothetical protein; K19613 leucine-rich repeat protein SHOC2	PRGWK00000230	MELO3C017212	Contributed_R-Genes	Cucumis melo	RLP	--	5.96e-158	5
XP_002517677.1-D93	scaffold2918	231355	235355	-	Leucine rich repeat;Leucine Rich Repeat;Leucine rich repeat N-terminal domain;Leucine-rich repeat signature	LRR receptor-like serine/threonine-protein kinase FLS2-like; K13420 LRR receptor-like serine/threonine-protein kinase FLS2 [EC:2.7.11.1]	PRGWK00000007	MELO3C002280	Contributed_R-Genes	Cucumis melo	RLP	--	0	5
NP_175957.1-D344	scaffold2918	351643	355099	-	Leucine rich repeat N-terminal domain;Protein kinase domain	probable receptor protein kinase TMK1; K00924	PRGDB00069447	Gma.58482	Putative_R-Genes,_predicted_from_NCBI_UniGene	Glycine max	RLP	Glycine max clone cw72 NAK-type protein kinase mRNA, complete cds	0	5
XP_007141948.1-D2	scaffold2918	531702	533816	+	Legume lectin domain;Protein kinase domain	Concanavalin A-like lectin protein kinase family protein, putative; K04730 interleukin-1 receptor-associated kinase 1 [EC:2.7.11.1]	PRGDB00067044	At.71840	Putative_R-Genes,_predicted_from_NCBI_UniGene	Arabidopsis thaliana	RLK	BX836338 Arabidopsis thaliana Hormone Treated Callus Col-0 Arabidopsis thaliana cDNA clone GSLTPGH55ZE05 3PRIM, mRNA sequence	1.92e-115	5
XP_003537432.2	scaffold2918	575675	579695	+	Glycosyl transferases group 1;Sucrose synthase	hypothetical protein; K00695 sucrose synthase [EC:2.4.1.13]	PRGDB00192324	Mtr.12478	Putative_R-Genes,_predicted_from_NCBI_UniGene	Medicago truncatula	TNL	Medicago truncatula Sucrose synthase (MTR_6g081120) mRNA, complete cds	5.37e-74	5
XP_004502407.1-D2	scaffold2066	458557	460667	+	Protein kinase domain	serine/threonine-protein kinase SAPK2-like; K14498 serine/threonine-protein kinase SRK2 [EC:2.7.11.1]	PRGDB00189827	Hv.34453	Putative_R-Genes,_predicted_from_NCBI_UniGene	Hordeum vulgare	NL	Hordeum vulgare subsp. vulgare mRNA for predicted protein, complete cds, clone: NIASHv2106K13	2.36e-140	5
XP_007159666.1	scaffold2066	549991	554107	+	Leucine rich repeat N-terminal domain;Protein kinase domain	somatic embryogenesis receptor kinase 1-like; K13418 somatic embryogenesis receptor kinase 1 [EC:2.7.10.1 2.7.11.1]	PRGDB00158036	Glyma05g31120.1	Putative_R-Genes,_predicted_from_Pythozome	Glycine max	RLP	leucine-rich repeat transmembrane protein kinase family protein (best arabidopsis hit)	0	5
XP_006580273.1	scaffold2066	565175	570546	-	CG-1 domain;IPT/TIG domain;IQ calmodulin-binding motif	triosephosphate isomerase-like; K01803 triosephosphate isomerase (TIM) [EC:5.3.1.1]	PRGDB00189864	Hv.35067	Putative_R-Genes,_predicted_from_NCBI_UniGene	Hordeum vulgare	NL	Hordeum vulgare subsp. vulgare mRNA for predicted protein, complete cds, clone: NIASHv2089K17	5.94e-35	5
XP_003541427.1-D6	scaffold2066	674843	677454	+	ABC-2 type transporter;ABC transporter	hypothetical protein; K05681 ATP-binding cassette, subfamily G (WHITE), member 2	PRGDB00159658	Glyma08g07530.1	Putative_R-Genes,_predicted_from_Pythozome	Glycine max	N	white-brown complex homolog protein 11 (best arabidopsis hit)	0	5
XP_014618140.1-D477	scaffold2066	690700	691509	-	Reverse transcriptase (RNA-dependent DNA polymerase)	Myosin XI; K10357 myosin V	PRGDB00186672	--	Putative_R-Genes,_collected_from_NCBI_Protein	Arachis hypogaea	NL	Arachis hypogaea clone AHF-205D04 NBS-LRR gene cluster, complete sequence.	5.88e-123	5
XP_004486640.1	scaffold1978	22965	30755	+	WD domain, G-beta repeat	protein TOPLESS-like; K14963 COMPASS component SWD3	PRGDB00170410	LOC_Os05g15040.2	Putative_R-Genes,_predicted_from_Pythozome	Oryza sativa	NL	TOPLESS-related 1 (best arabidopsis hit)	8.14e-64	5
XP_002522276.1-D131	scaffold1978	96453	97966	-	Protein tyrosine kinase	PTI1-like tyrosine-protein kinase At3g15890; K04733 interleukin-1 receptor-associated kinase 4 [EC:2.7.11.1]	PRGDB00064120	Zm.28649	Putative_R-Genes,_predicted_from_NCBI_UniGene	Zea mays	RLK	Zea mays full-length cDNA clone ZM_BFb0232B17 mRNA, complete cds	1.01e-169	5
XP_012572486.1-D67	scaffold1978	128869	248750	+	PPR repeat;PPR repeat family;Protein kinase domain	pentatricopeptide repeat-containing protein At1g52620-like; K17964 leucine-rich PPR motif-containing protein, mitochondrial	PRGDB00061455	Pid2	Reference_R-Genes,_manually_curated	Oryza sativa Indica Group	Other	Oryza sativa Indica Group cultivar Digu B-lectin receptor kinase (Pid2) gene, complete cds.	6.18e-145	5
XP_004486694.1	scaffold1978	277790	279167	+	Glutaredoxin	uncharacterized LOC100306093; K07390 monothiol glutaredoxin	PRGDB00206415	Lus10026132	Putative_R-Genes,_predicted_from_Pythozome	Linum usitatissimum	NL	--	4.6e-31	5
XP_014621614.1-D3	scaffold1978	402865	408778	+	ABC-2 type transporter;ABC transporter;ABC-transporter extracellular N-terminal;Plant PDR ABC transporter associated	hypothetical protein; K05681 ATP-binding cassette, subfamily G (WHITE), member 2	PRGDB00188933	Gma.54499	Putative_R-Genes,_predicted_from_NCBI_UniGene	Glycine max	N	PREDICTED: Glycine max pleiotropic drug resistance protein 1-like (LOC100793825), mRNA	0	5
XP_002517677.1-D16	scaffold15567	30844	40656	+	Leucine rich repeat;Leucine Rich Repeat;Leucine rich repeat N-terminal domain;Protein kinase domain;TMEM154 protein family	putative receptor-like protein kinase At3g47110; K13420 LRR receptor-like serine/threonine-protein kinase FLS2 [EC:2.7.11.1]	PRGDB00167333	AC233576_1.1	Putative_R-Genes,_predicted_from_Pythozome	Medicago truncatula	RLP	Leucine-rich repeat protein kinase family protein (best arabidopsis hit)	0	5
XP_014621758.1-D151	scaffold15567	49726	59337	-	Leucine rich repeat N-terminal domain;Protein kinase domain;Protein tyrosine kinase	shaggy-related protein kinase eta-like; K14502 protein brassinosteroid insensitive 2 [EC:2.7.11.1]	PRGDB00189026	Gma.60608	Putative_R-Genes,_predicted_from_NCBI_UniGene	Glycine max	RLP	PREDICTED: Glycine max probable LRR receptor-like serine	0	5
XP_008377334.1-D172	scaffold15567	87766	90301	-	Leucine rich repeat;Leucine Rich Repeat;Leucine-rich repeat signature;Protein tyrosine kinase	probable LRR receptor-like serine/threonine-protein kinase At2g24230; K04730 interleukin-1 receptor-associated kinase 1 [EC:2.7.11.1]	PRGDB00163811	Glyma15g09050.1	Putative_R-Genes,_predicted_from_Pythozome	Glycine max	RLP	Leucine-rich repeat protein kinase family protein (best arabidopsis hit)	0	5
XP_008371487.1	scaffold15567	145171	148829	-	Leucine rich repeat;Leucine rich repeat N-terminal domain;Protein tyrosine kinase	probable inactive receptor-like protein kinase At3g56050; K04733 interleukin-1 receptor-associated kinase 4 [EC:2.7.11.1]	PRGDB00168330	Medtr4g134770.1	Putative_R-Genes,_predicted_from_Pythozome	Medicago truncatula	RLP	Leucine-rich repeat protein kinase family protein (best arabidopsis hit)	0	5
XP_007148038.1	scaffold15567	158083	159888	+	Protein of unknown function (DUF1637)	hypothetical protein; K10712 cysteamine dioxygenase [EC:1.13.11.19]	PRGDB00192469	Mtr.23140	Putative_R-Genes,_predicted_from_NCBI_UniGene	Medicago truncatula	N	Medicago truncatula NBS-LRR resistance-like protein 4U (MTR_4g080080) mRNA, complete cds	1.53e-99	5
XP_003546640.1-D5	scaffold15268	6691	12439	+	Peptidase dimerisation domain;Peptidase family M20/M25/M40	IAA-amino acid hydrolase ILR1-like 4-like; K14664 IAA-amino acid hydrolase [EC:3.5.1.-]	PRGDB00167788	Medtr2g121840.1	Putative_R-Genes,_predicted_from_Pythozome	Medicago truncatula	RLP	Leucine-rich repeat transmembrane protein kinase protein (best arabidopsis hit)	6.29e-58	5
XP_007135595.1-D5	scaffold15268	19582	38465	+	Peptidase dimerisation domain;Peptidase family M20/M25/M40	IAA-amino acid hydrolase ILR1-like 4-like; K14664 IAA-amino acid hydrolase [EC:3.5.1.-]	PRGDB00167788	Medtr2g121840.1	Putative_R-Genes,_predicted_from_Pythozome	Medicago truncatula	RLP	Leucine-rich repeat transmembrane protein kinase protein (best arabidopsis hit)	7.7e-59	5
XP_007135595.1	scaffold15268	48569	51603	+	Peptidase dimerisation domain;Peptidase family M20/M25/M40	IAA-amino acid hydrolase ILR1-like 4-like; K14664 IAA-amino acid hydrolase [EC:3.5.1.-]	PRGDB00167788	Medtr2g121840.1	Putative_R-Genes,_predicted_from_Pythozome	Medicago truncatula	RLP	Leucine-rich repeat transmembrane protein kinase protein (best arabidopsis hit)	2.05e-65	5
XP_002515931.1	scaffold15268	119523	133955	-	Carbohydrate-binding protein of the ER;Leucine rich repeat;Protein tyrosine kinase	hypothetical protein; K16224 senescence-induced receptor-like serine/threonine-protein kinase	PRGDB00188437	Gma.19110	Putative_R-Genes,_predicted_from_NCBI_UniGene	Glycine max	RLP	PREDICTED: Glycine max putative leucine-rich repeat receptor-like protein kinase At2g19210-like (LOC100794504), mRNA	0	5
XP_014633910.1-D12	scaffold15268	157377	162180	-	Carbohydrate-binding protein of the ER;Protein tyrosine kinase	FRK1; FLG22-induced receptor-like kinase 1; K16224 senescence-induced receptor-like serine/threonine-protein kinase	PRGDB00187651	Gma.64036	Putative_R-Genes,_predicted_from_NCBI_UniGene	Glycine max	RLP	Glycine max clone cw98 stress-induced receptor-like kinase mRNA, complete cds	3.15e-131	5
XP_007143329.1	scaffold9156	120439	127209	+	Leucine rich repeat;Leucine Rich Repeat;Leucine rich repeat N-terminal domain;Protein kinase domain	receptor protein kinase CLAVATA1; K00924	PRGDB00196287	Phvulv091023336m	Putative_R-Genes,_predicted_from_Pythozome	Phaseolus vulgaris	RLP	--	0	4
XP_003535639.1	scaffold9156	169018	174586	-	Ethylene-responsive protein kinase Le-CTR1;Leucine rich repeat;Leucine-rich repeat signature;Protein kinase domain	hypothetical protein; K13414 mitogen-activated protein kinase kinase kinase 1, plant [EC:2.7.11.25]	PRGWK00002037	Sotub09g024330.1.1	Contributed_R-Genes	Solanum tuberosum	RLK	--	1.55e-78	4
XP_003552234.2-D282	scaffold9156	327905	333989	+	Ribosomal S3Ae family	hypothetical protein; K02984 small subunit ribosomal protein S3Ae	PRGWK00000100	MELO3C006506	Contributed_R-Genes	Cucumis melo	RLP	--	2.82e-162	4
NP_001235355.1	scaffold9156	648451	649083	-	PsaD	photosystem I reaction center subunit II, chloroplastic-like; K02692 photosystem I subunit II	PRGDB00192813	Smo.15449	Putative_R-Genes,_predicted_from_NCBI_UniGene	Selaginella moellendorffii	N	Selaginella moellendorffii hypothetical protein, mRNA	1.71e-79	4
XP_008342009.1	scaffold9030	14185	20203	+	Disease resistance protein signature;NB-ARC domain;Nucleoside transporter	Cc-nbs-lrr resistance protein; K19613 leucine-rich repeat protein SHOC2	PRGDB00168300	Medtr4g118190.1	Putative_R-Genes,_predicted_from_Pythozome	Medicago truncatula	NL	NB-ARC domain-containing disease resistance protein (best arabidopsis hit)	0	4
XP_012574864.1-D2	scaffold9030	16724	45588	+	Disease resistance protein signature;NB-ARC domain	Cc-nbs-lrr resistance protein; K19613 leucine-rich repeat protein SHOC2	PRGDB00168300	Medtr4g118190.1	Putative_R-Genes,_predicted_from_Pythozome	Medicago truncatula	NL	NB-ARC domain-containing disease resistance protein (best arabidopsis hit)	0	4
XP_012574864.1	scaffold9030	86353	151692	-	Disease resistance protein signature;NB-ARC domain	Cc-nbs-lrr resistance protein; K19613 leucine-rich repeat protein SHOC2	PRGDB00168300	Medtr4g118190.1	Putative_R-Genes,_predicted_from_Pythozome	Medicago truncatula	NL	NB-ARC domain-containing disease resistance protein (best arabidopsis hit)	0	4
XP_003540594.1	scaffold9030	356342	364441	-	Calcineurin-like phosphoesterase;Iron/zinc purple acid phosphatase-like protein C;Purple acid Phosphatase, N-terminal domain	uncharacterized LOC103646105; K02993 small subunit ribosomal protein S7e	PRGDB00215941	MDP0000321189	Putative_R-Genes,_predicted_from_Pythozome	Malus x domestica	NL	--	1.01e-25	4
XP_007157884.1-D2	scaffold7254	11546	12491	-	Skp1 family, dimerisation domain;Skp1 family, tetramerisation domain	SKP1-like protein 1A; K03094 S-phase kinase-associated protein 1	PRGDB00215380	MDP0000255887	Putative_R-Genes,_predicted_from_Pythozome	Malus x domestica	TNL	--	1.94e-60	4
XP_003548725.1	scaffold7254	365249	385118	-	ABC-2 type transporter;ABC transporter;ABC-transporter extracellular N-terminal;G-patch domain;Plant PDR ABC transporter associated;RNA recognition motif. (a.k.a. RRM, RBD, or RNP domain)	RNA-binding protein 10-like; K13094 RNA-binding protein 5/10	PRGDB00196337	Phvulv091016142m	Putative_R-Genes,_predicted_from_Pythozome	Phaseolus vulgaris	N	--	0	4
XP_003530535.1	scaffold7254	423117	428837	-	Leucine rich repeat N-terminal domain;Protein tyrosine kinase	POPTRDRAFT_756677; hypothetical protein; K04730 interleukin-1 receptor-associated kinase 1 [EC:2.7.11.1]	PRGDB00188705	Gma.37394	Putative_R-Genes,_predicted_from_NCBI_UniGene	Glycine max	RLP	PREDICTED: Glycine max probable leucine-rich repeat receptor-like protein kinase At5g49770-like (LOC100792249), mRNA	0	4
XP_008376379.1	scaffold7254	486860	488426	-	Protein tyrosine kinase	Os01g0819100; Similar to predicted protein.; K04733 interleukin-1 receptor-associated kinase 4 [EC:2.7.11.1]	PRGDB00067585	Bol.23954	Putative_R-Genes,_predicted_from_NCBI_UniGene	Brassica oleracea	RLK	DK491348 full-length kale cDNA library (leaves) Brassica oleracea var. acephala cDNA clone KALE-093J18 5', mRNA sequence	7.56e-82	4
XP_004485894.1	scaffold6458	40212	40811	-	Protein of unknown function (DUF640)	-	PRGDB00155469	orange1.1g000354m	Putative_R-Genes,_predicted_from_Pythozome	Citrus sinensis	CNL	NB-ARC domain-containing disease resistance protein (best arabidopsis hit)	1.18e-78	4
XP_008390461.1-D493	scaffold6458	175775	177290	+	Reverse transcriptase (RNA-dependent DNA polymerase)	uncharacterized LOC104905624; K05658 ATP-binding cassette, subfamily B (MDR/TAP), member 1 [EC:3.6.3.44]	PRGDB00047409	TIR-NBS-LRR-TIR type disease resistance protein	Putative_R-Genes,_collected_from_NCBI_Protein	Populus trichocarpa	TNL	Populus trichocarpa clone 110301 TIR-NBS-LRR-TIR type disease resistance protein mRNA, partial cds.	7.06e-41	4
XP_012570563.1-D562	scaffold6458	347854	348546	+	Reverse transcriptase (RNA-dependent DNA polymerase)	uncharacterized LOC104905624; K05658 ATP-binding cassette, subfamily B (MDR/TAP), member 1 [EC:3.6.3.44]	PRGDB00217533	Thhalv10011182m	Putative_R-Genes,_predicted_from_Pythozome	Eutrema halophilum	CN	--	1.05e-24	4
XP_006588460.1	scaffold6458	444468	449883	-	Leucine rich repeat;Protein kinase domain	POPTRDRAFT_756677; hypothetical protein; K04730 interleukin-1 receptor-associated kinase 1 [EC:2.7.11.1]	PRGDB00160978	Glyma10g08010.1	Putative_R-Genes,_predicted_from_Pythozome	Glycine max	RLP	Leucine-rich repeat protein kinase family protein (best arabidopsis hit)	0	4
XP_007143990.1-D7	scaffold6143	324515	325315	+	Cupin;Germin signature	uncharacterized LOC101250545; K11426 SET and MYND domain-containing protein	PRGDB00182795	GSVIVT01000058001	Putative_R-Genes,_predicted_from_Pythozome	Vitis vinifera	RLP	Leucine-rich repeat protein kinase family protein (best arabidopsis hit)	2.19e-81	4
XP_007143990.1-D8	scaffold6143	393672	394490	+	Cupin;Germin signature	uncharacterized LOC101250545; K11426 SET and MYND domain-containing protein	PRGDB00182795	GSVIVT01000058001	Putative_R-Genes,_predicted_from_Pythozome	Vitis vinifera	RLP	Leucine-rich repeat protein kinase family protein (best arabidopsis hit)	1.04e-75	4
XP_008367681.1-D12	scaffold6143	439561	454690	+	Cupin;Germin signature;Malic enzyme, NAD binding domain	uncharacterized LOC101250545; K11426 SET and MYND domain-containing protein	PRGWK00000444	Solyc01g102880.1.1	Contributed_R-Genes	Solanum lycopersicum	TNL-OT	--	8.98e-59	4
XP_007143990.1-D6	scaffold6143	447772	448596	+	Cupin;Germin signature	uncharacterized LOC101250545; K11426 SET and MYND domain-containing protein	PRGDB00182795	GSVIVT01000058001	Putative_R-Genes,_predicted_from_Pythozome	Vitis vinifera	RLP	Leucine-rich repeat protein kinase family protein (best arabidopsis hit)	7.56e-79	4
XP_007140046.1	scaffold5895	74225	77963	+	Acetyltransferase (GNAT) family	-	PRGDB00213497	MDP0000439417	Putative_R-Genes,_predicted_from_Pythozome	Malus x domestica	RLP	--	2.73e-58	4
XP_012569085.1	scaffold5895	113474	119766	+	Leucine rich repeat;Leucine rich repeat N-terminal domain;Protein kinase domain	hypothetical protein; K04730 interleukin-1 receptor-associated kinase 1 [EC:2.7.11.1]	PRGDB00164955	Glyma18g44950.1	Putative_R-Genes,_predicted_from_Pythozome	Glycine max	RLP	Leucine-rich repeat protein kinase family protein (best arabidopsis hit)	0	4
XP_002531806.1	scaffold5895	150461	157745	+	Leucine rich repeat;Leucine rich repeat N-terminal domain;Protein kinase domain	hypothetical protein; K04730 interleukin-1 receptor-associated kinase 1 [EC:2.7.11.1]	PRGDB00164955	Glyma18g44950.1	Putative_R-Genes,_predicted_from_Pythozome	Glycine max	RLP	Leucine-rich repeat protein kinase family protein (best arabidopsis hit)	0	4
XP_002531808.1	scaffold5895	173016	211095	-	Domain of unknown function (DUF3411);Homodimerisation region of STAR domain protein	KH domain-containing protein At2g38610-like; K14945 protein quaking	PRGDB00213184	MDP0000285888	Putative_R-Genes,_predicted_from_Pythozome	Malus x domestica	CNL	--	5.34e-67	4
XP_007154870.1-D2	scaffold5474	3863	6078	-	70kDa heat shock protein signature;Hsp70 protein	heat shock protein, putative (EC:1.3.1.74); K03283 heat shock 70kDa protein 1/8; K06758 L1 cell adhesion molecule like protein	PRGDB00167710	Medtr2g047020.1	Putative_R-Genes,_predicted_from_Pythozome	Medicago truncatula	TNL	heat shock cognate protein 70-1 (best arabidopsis hit)	0	4
XP_004507067.1	scaffold5474	124150	128675	-	Domain of unknown function (DUF1995)	-	PRGDB00065930	At.11684	Putative_R-Genes,_predicted_from_NCBI_UniGene	Arabidopsis thaliana	RLP	Arabidopsis thaliana At1g73070 mRNA for unknown protein, complete cds, clone: RAFL16-96-P09	5.2e-155	4
XP_007135776.1	scaffold5474	678683	687260	+	WD domain, G-beta repeat	protein TOPLESS-like; K14963 COMPASS component SWD3	PRGDB00170410	LOC_Os05g15040.2	Putative_R-Genes,_predicted_from_Pythozome	Oryza sativa	NL	TOPLESS-related 1 (best arabidopsis hit)	1.65e-63	4
XP_003531725.1	scaffold5474	702407	706478	-	Inorganic H+ pyrophosphatase	pyrophosphate-energized vacuolar membrane proton pump-like; K01507 inorganic pyrophosphatase [EC:3.6.1.1]	PRGDB00184313	GSVIVT01034326001	Putative_R-Genes,_predicted_from_Pythozome	Vitis vinifera	RLK-GNK2	cysteine-rich RLK (RECEPTOR-like protein kinase) 10 (best arabidopsis hit)	8.23e-40	4
XP_004505722.1	scaffold4546	93415	106325	-	Protein kinase domain	serine/threonine protein kinase (EC:2.7.11.1); K06683 cell division control protein CDC15 [EC:2.7.11.1]	PRGDB00196393	Phvulv091015206m	Putative_R-Genes,_predicted_from_Pythozome	Phaseolus vulgaris	N	--	0	4
XP_007131657.1	scaffold4546	133632	144306	-	Alanyl-tRNA synthetase signature;Threonyl and Alanyl tRNA synthetase second additional domain;tRNA synthetases class II (A)	hypothetical protein; K01872 alanyl-tRNA synthetase [EC:6.1.1.7]	PRGDB00204912	Lus10017408	Putative_R-Genes,_predicted_from_Pythozome	Linum usitatissimum	CN	--	0	4
XP_003540735.1	scaffold4546	254143	256026	-	Ribosomal protein L7Ae/L30e/S12e/Gadd45 family;Ribosomal protein L7A family signature;Ribosomal protein L7A/RS6 family signature	60S ribosomal protein L7a-like; K02936 large subunit ribosomal protein L7Ae	PRGDB00204891	Lus10020500	Putative_R-Genes,_predicted_from_Pythozome	Linum usitatissimum	RLP	--	1.77e-154	4
XP_008364216.1-D206	scaffold4546	397406	398998	-	GAG-pre-integrase domain;Integrase core domain;Reverse transcriptase (RNA-dependent DNA polymerase)	Os11g0157000; K12619 5'-3' exoribonuclease 2 [EC:3.1.13.-]	PRGDB00047409	TIR-NBS-LRR-TIR type disease resistance protein	Putative_R-Genes,_collected_from_NCBI_Protein	Populus trichocarpa	TNL	Populus trichocarpa clone 110301 TIR-NBS-LRR-TIR type disease resistance protein mRNA, partial cds.	3.93e-29	4
XP_006594359.1-D78	scaffold3321	346187	360578	-	Disease resistance protein signature;NB-ARC domain	leucine-rich repeat containing protein, putative (EC:3.1.3.16); K15078 structure-specific endonuclease subunit SLX1 [EC:3.6.1.-]	PRGDB00195792	Phvulv091001221m	Putative_R-Genes,_predicted_from_Pythozome	Phaseolus vulgaris	NL	--	0	4
XP_007151074.1-D87	scaffold3321	460926	479998	-	Disease resistance protein signature;NB-ARC domain	disease resistance protein RGA2-like; K19613 leucine-rich repeat protein SHOC2	PRGDB00195548	Phvulv091020863m	Putative_R-Genes,_predicted_from_Pythozome	Phaseolus vulgaris	CNL	--	0	4
XP_006576815.1	scaffold3321	619861	640876	+	ABC-2 family transporter protein;ABC transporter	ABC transporter A family member 1-like; K05643 ATP-binding cassette, subfamily A (ABC1), member 3	PRGDB00190465	Lsa.19393	Putative_R-Genes,_predicted_from_NCBI_UniGene	Lactuca sativa	N	TSA: Lactuca sativa Letassy_X1_29 mRNA sequence	0	4
XP_014621691.1-D8	scaffold3321	689547	715596	-	ABC-2 type transporter;ABC transporter	hypothetical protein; K05681 ATP-binding cassette, subfamily G (WHITE), member 2	PRGDB00069344	Gma.53856	Putative_R-Genes,_predicted_from_NCBI_UniGene	Glycine max	N	Soybean clone JCVI-FLGm-24H15 unknown mRNA	0	4
XP_007142489.1	scaffold3074	312702	327329	-	Disease resistance protein signature;NB-ARC domain;SAM domain (Sterile alpha motif)	hypothetical protein; K13459 disease resistance protein RPS2	PRGDB00195978	Phvulv091013127m	Putative_R-Genes,_predicted_from_Pythozome	Phaseolus vulgaris	CNL	--	0	4
NP_196159.1-D18	scaffold3074	325887	327239	-	Disease resistance protein signature;NB-ARC domain	hypothetical protein; K13459 disease resistance protein RPS2	PRGDB00195977	Phvulv091013126m	Putative_R-Genes,_predicted_from_Pythozome	Phaseolus vulgaris	CNL	--	0	4
XP_008346284.1-D26	scaffold3074	334654	343877	-	Disease resistance protein signature;NB-ARC domain	hypothetical protein; K13459 disease resistance protein RPS2	PRGDB00168892	Medtr5g092860.1	Putative_R-Genes,_predicted_from_Pythozome	Medicago truncatula	CNL	NB-ARC domain-containing disease resistance protein (best arabidopsis hit)	1.41e-47	4
NP_001237835.1-D2	scaffold3074	897264	901031	-	Disease resistance protein signature;NB-ARC domain	putative disease resistance RPP13-like protein 1; K19613 leucine-rich repeat protein SHOC2	PRGDB00167816	Medtr3g008420.1	Putative_R-Genes,_predicted_from_Pythozome	Medicago truncatula	NL	LRR and NB-ARC domains-containing disease resistance protein (best arabidopsis hit)	1.62e-24	4
XP_004502518.1	scaffold2072	104111	107693	+	ATPase family associated with various cellular activities (AAA);Replication factor C C-terminal domain	replication factor C subunit 2; K10755 replication factor C subunit 2/4	PRGDB00217276	MDP0000270025	Putative_R-Genes,_predicted_from_Pythozome	Malus x domestica	CNL	--	8.83e-23	4
XP_007147542.1-D2	scaffold2072	603717	618335	-	Glutathione S-transferase, N-terminal domain;Leucine Rich repeats (2 copies);Protein tyrosine kinase	POPTRDRAFT_756677; hypothetical protein; K04730 interleukin-1 receptor-associated kinase 1 [EC:2.7.11.1]	PRGDB00188398	Gma.16701	Putative_R-Genes,_predicted_from_NCBI_UniGene	Glycine max	RLP	PREDICTED: Glycine max probable leucine-rich repeat receptor-like protein kinase At5g49770-like (LOC100811702), mRNA	0	4
XP_014623409.1	scaffold2072	950095	952106	+	Protein kinase domain	protein kinase G11A-like; K08286 protein-serine/threonine kinase [EC:2.7.11.-]	PRGDB00216033	MDP0000314577	Putative_R-Genes,_predicted_from_Pythozome	Malus x domestica	RLP	--	1.43e-87	4
XP_012574773.1-D135	scaffold2072	991062	992929	-	Leucine rich repeat;Leucine-rich repeat signature	SORBIDRAFT_06g028760, Sb06g028760; hypothetical protein; K13420 LRR receptor-like serine/threonine-protein kinase FLS2 [EC:2.7.11.1]	PRGWK00000590	Solyc03g112680.1.1	Contributed_R-Genes	Solanum lycopersicum	RLP	--	0	4
XP_007136277.1	scaffold20218	4480	11337	-	Domain of unknown function DUF21;Mitochondrial ribosomal protein L27	DUF21 domain-containing protein At1g47330-like; K16302 metal transporter CNNM	PRGDB00192275	Mtr.10176	Putative_R-Genes,_predicted_from_NCBI_UniGene	Medicago truncatula	RLP	Medicago truncatula Receptor-like protein kinase (MTR_5g045910) mRNA, complete cds	9.09e-33	4
XP_002513632.1-D2	scaffold20218	13747	16083	+	CS domain;SGS domain;Tetratricopeptide repeat;TPR repeat	protein SGT1 homolog; K12795 suppressor of G2 allele of SKP1	PRGDB00215739	MDP0000180046	Putative_R-Genes,_predicted_from_Pythozome	Malus x domestica	TNL	--	6.09e-43	4
NP_191069.2-D10	scaffold20218	25144	26964	-	ABC-2 type transporter;ABC transporter	ppabcg12; ATP-binding cassette transporter, subfamily G, member 12, group WBC protein PpABCG12; K05681 ATP-binding cassette, subfamily G (WHITE), member 2	PRGDB00167574	Medtr1g126360.1	Putative_R-Genes,_predicted_from_Pythozome	Medicago truncatula	N	ABC-2 type transporter family protein (best arabidopsis hit)	0	4
XP_007143485.1	scaffold20218	25748	33486	-	ABC transporter	ppabcg30; ATP-binding cassette transporter, subfamily G, member 30, group WBC protein PpABCG30; K05681 ATP-binding cassette, subfamily G (WHITE), member 2	PRGDB00167574	Medtr1g126360.1	Putative_R-Genes,_predicted_from_Pythozome	Medicago truncatula	N	ABC-2 type transporter family protein (best arabidopsis hit)	3.03e-171	4
XP_007156082.1-D2	scaffold1409	209822	219269	-	ESCO1/2 acetyl-transferase;zinc-finger of acetyl-transferase ESCO	protein CHROMOSOME TRANSMISSION FIDELITY 7-like; K11268 N-acetyltransferase [EC:2.3.1.-]	PRGDB00183512	GSVIVT01018889001	Putative_R-Genes,_predicted_from_Pythozome	Vitis vinifera	CNL	HOPZ-ACTIVATED RESISTANCE 1 (best arabidopsis hit)	7.96e-100	4
XP_004504202.1	scaffold1409	209822	219269	-	ESCO1/2 acetyl-transferase;zinc-finger of acetyl-transferase ESCO	protein CHROMOSOME TRANSMISSION FIDELITY 7-like; K11268 N-acetyltransferase [EC:2.3.1.-]	PRGDB00183512	GSVIVT01018889001	Putative_R-Genes,_predicted_from_Pythozome	Vitis vinifera	CNL	HOPZ-ACTIVATED RESISTANCE 1 (best arabidopsis hit)	4.48e-84	4
XP_007145792.1-D2	scaffold1409	244878	248086	-	Leucine rich repeat;Leucine rich repeat N-terminal domain;Protein kinase domain	probable receptor protein kinase TMK1; K00924	PRGDB00194988	Phvulv091000094m	Putative_R-Genes,_predicted_from_Pythozome	Phaseolus vulgaris	RLP	--	0	4
XP_006607041.1-D154	scaffold1409	366036	366392	-	-	Myosin XI; K10357 myosin V	PRGDB00186672	--	Putative_R-Genes,_collected_from_NCBI_Protein	Arachis hypogaea	NL	Arachis hypogaea clone AHF-205D04 NBS-LRR gene cluster, complete sequence.	5.87e-47	4
XP_008371728.1	scaffold1304	32984	95736	+	Di-glucose binding within endoplasmic reticulum;Leucine rich repeat;Leucine rich repeat N-terminal domain;Leucine-rich repeat signature;Protein tyrosine kinase	hypothetical protein; K04733 interleukin-1 receptor-associated kinase 4 [EC:2.7.11.1]	PRGDB00162718	Glyma13g29640.1	Putative_R-Genes,_predicted_from_Pythozome	Glycine max	RLP	receptor-like kinase in flowers 1 (best arabidopsis hit)	0	4
XP_006593319.1	scaffold1304	32984	39415	+	Di-glucose binding within endoplasmic reticulum;Leucine rich repeat;Protein tyrosine kinase	hypothetical protein; K04733 interleukin-1 receptor-associated kinase 4 [EC:2.7.11.1]	PRGDB00162718	Glyma13g29640.1	Putative_R-Genes,_predicted_from_Pythozome	Glycine max	RLP	receptor-like kinase in flowers 1 (best arabidopsis hit)	0	4
XP_007147977.1	scaffold1304	39599	45970	-	70kDa heat shock protein signature;Dynamin central region;Dynamin family;Dynamin GTPase effector domain;Hsp70 protein	dynamin-related protein 4C-like; K14754 interferon-induced GTP-binding protein Mx1	PRGDB00167710	Medtr2g047020.1	Putative_R-Genes,_predicted_from_Pythozome	Medicago truncatula	TNL	heat shock cognate protein 70-1 (best arabidopsis hit)	4.77e-164	4
XP_003541684.1	scaffold1304	39599	44429	-	70kDa heat shock protein signature;Dynamin central region;Dynamin family;Dynamin GTPase effector domain;Hsp70 protein	dynamin-related protein 4C-like; K14754 interferon-induced GTP-binding protein Mx1	PRGDB00167710	Medtr2g047020.1	Putative_R-Genes,_predicted_from_Pythozome	Medicago truncatula	TNL	heat shock cognate protein 70-1 (best arabidopsis hit)	6.14e-126	4
XP_004509458.1	scaffold12529	14094	18953	+	Protein kinase domain;Ribonuclease 2-5A	serine/threonine-protein kinase/endoribonuclease IRE1a-like; K08852 serine/threonine-protein kinase/endoribonuclease IRE1 [EC:2.7.11.1 3.1.26.-]	PRGDB00216218	MDP0000752579	Putative_R-Genes,_predicted_from_Pythozome	Malus x domestica	N	--	4.18e-83	4
XP_002532504.1-D6	scaffold12529	72368	80515	+	Protein phosphatase 2C	hypothetical protein; K14803 protein phosphatase 2C homolog 2/3 [EC:3.1.3.16]	PRGDB00213421	MDP0000280399	Putative_R-Genes,_predicted_from_Pythozome	Malus x domestica	RLP	--	1.42e-92	4
XP_002527144.1-D2	scaffold12529	81607	82887	+	Transmembrane amino acid transporter protein	hypothetical protein; K14209 solute carrier family 36 (proton-coupled amino acid transporter)	PRGDB00214610	MDP0000288298	Putative_R-Genes,_predicted_from_Pythozome	Malus x domestica	TNL	--	6.11e-105	4
XP_002522604.1-D147	scaffold12529	198717	203287	+	TIR domain	uncharacterized protein At2g41620-like; K14309 nuclear pore complex protein Nup93	PRGDB00164247	Glyma16g22620.1	Putative_R-Genes,_predicted_from_Pythozome	Glycine max	TNL	disease resistance protein (TIR-NBS-LRR class), putative (best arabidopsis hit)	6.23e-62	4
NP_001237994.1-D27	scaffold11507	11011	14453	-	Leucine Rich Repeat;Leucine rich repeat N-terminal domain;Protein kinase domain	receptor protein kinase CLAVATA1; K00924	PRGDB00167603	Medtr2g005580.1	Putative_R-Genes,_predicted_from_Pythozome	Medicago truncatula	RLP	Leucine-rich receptor-like protein kinase family protein (best arabidopsis hit)	0	4
XP_007148571.1	scaffold11507	48979	53695	-	Protein kinase domain	shaggy-related protein kinase kappa; K03083 glycogen synthase kinase 3 beta [EC:2.7.11.26]	PRGDB00215771	MDP0000180284	Putative_R-Genes,_predicted_from_Pythozome	Malus x domestica	RLP	--	0	4
XP_006597545.2	scaffold11507	244521	250942	-	Protein kinase domain	serine/threonine-protein kinase ULK4-like; K17545 serine/threonine-protein kinase ULK4 [EC:2.7.11.1]	PRGDB00188569	Gma.26168	Putative_R-Genes,_predicted_from_NCBI_UniGene	Glycine max	N	PREDICTED: Glycine max serine	0	4
XP_007154212.1-D2	scaffold11507	365905	369290	-	1-deoxy-D-xylulose-5-phosphate synthase;Transketolase, C-terminal domain;Transketolase, pyrimidine binding domain	probable 1-deoxy-D-xylulose-5-phosphate synthase, chloroplastic; K01662 1-deoxy-D-xylulose-5-phosphate synthase [EC:2.2.1.7]	PRGDB00067001	At.66955	Putative_R-Genes,_predicted_from_NCBI_UniGene	Arabidopsis thaliana	RPW8-NL	Arabidopsis thaliana mRNA for ADR1, complete cds, clone: RAFL15-45-C23	8.35e-145	4
NP_178304.1-D121	scaffold11171	61758	63843	-	Leucine rich repeat;Leucine Rich Repeat;Leucine rich repeat N-terminal domain;Protein kinase domain	Os01g0819100; Similar to predicted protein.; K04733 interleukin-1 receptor-associated kinase 4 [EC:2.7.11.1]	PRGDB00188298	Gma.7673	Putative_R-Genes,_predicted_from_NCBI_UniGene	Glycine max	RLP	PREDICTED: Glycine max probable inactive receptor kinase At5g58300-like (LOC100796171), mRNA	0	4
XP_007159576.1-D22	scaffold11171	106152	119201	+	Leucine rich repeat N-terminal domain;PPR repeat;PPR repeat family;Protein kinase domain	hypothetical protein; K04730 interleukin-1 receptor-associated kinase 1 [EC:2.7.11.1]	PRGDB00189133	Gma.62613	Putative_R-Genes,_predicted_from_NCBI_UniGene	Glycine max	RLP	PREDICTED: Glycine max probable LRR receptor-like serine	0	4
XP_004500394.1	scaffold11171	109685	119201	+	Leucine rich repeat N-terminal domain;PPR repeat;PPR repeat family;Protein kinase domain	hypothetical protein; K04730 interleukin-1 receptor-associated kinase 1 [EC:2.7.11.1]	PRGDB00189133	Gma.62613	Putative_R-Genes,_predicted_from_NCBI_UniGene	Glycine max	RLP	PREDICTED: Glycine max probable LRR receptor-like serine	0	4
XP_007141998.1-D2	scaffold11171	139132	143560	-	Homodimerisation region of STAR domain protein;Protein of unknown function (DUF2741)	KH domain-containing protein At3g08620-like; K14945 protein quaking	PRGDB00213184	MDP0000285888	Putative_R-Genes,_predicted_from_Pythozome	Malus x domestica	CNL	--	2.18e-60	4
XP_003556014.2-D8	scaffold10791	37448	48851	+	Protein tyrosine kinase;Salt stress response/antifungal	Cysteine-rich receptor-like protein kinase; K04733 interleukin-1 receptor-associated kinase 4 [EC:2.7.11.1]	PRGDB00196348	Phvulv091012369m	Putative_R-Genes,_predicted_from_Pythozome	Phaseolus vulgaris	RLK-GNK2	--	0	4
XP_002518548.1-D12	scaffold10791	59268	65280	-	Domain of unknown function (DUF3403);Protein tyrosine kinase;Salt stress response/antifungal	Cysteine-rich receptor-like protein kinase; K04733 interleukin-1 receptor-associated kinase 4 [EC:2.7.11.1]	PRGDB00196348	Phvulv091012369m	Putative_R-Genes,_predicted_from_Pythozome	Phaseolus vulgaris	RLK-GNK2	--	0	4
NP_197188.1-D15	scaffold10791	235034	246557	-	DYW family of nucleic acid deaminases;Ethylene-responsive protein kinase Le-CTR1;PPR repeat;PPR repeat family;Protein tyrosine kinase;Tyrosine kinase catalytic domain signature	Kinase superfamily protein, putative isoform 2; K04424 sterile alpha motif and leucine zipper containing kinase AZK [EC:2.7.11.25]	PRGWK00000005	MELO3C002125	Contributed_R-Genes	Cucumis melo	RLK	--	2.24e-119	4
XP_006584897.1	scaffold10791	239300	246557	-	Ethylene-responsive protein kinase Le-CTR1;Protein tyrosine kinase;Tyrosine kinase catalytic domain signature	Kinase superfamily protein, putative isoform 2; K04424 sterile alpha motif and leucine zipper containing kinase AZK [EC:2.7.11.25]	PRGWK00000005	MELO3C002125	Contributed_R-Genes	Cucumis melo	RLK	--	0	4
XP_007147891.1	scaffold10493	125908	141368	-	ABC-2 type transporter;ABC transporter;Ribosomal protein S11	uncharacterized LOC100499665; K02955 small subunit ribosomal protein S14e	PRGDB00159658	Glyma08g07530.1	Putative_R-Genes,_predicted_from_Pythozome	Glycine max	N	white-brown complex homolog protein 11 (best arabidopsis hit)	0	4
XP_004504817.1-D8	scaffold10493	138535	141368	-	ABC-2 type transporter;ABC transporter	hypothetical protein; K05681 ATP-binding cassette, subfamily G (WHITE), member 2	PRGDB00159658	Glyma08g07530.1	Putative_R-Genes,_predicted_from_Pythozome	Glycine max	N	white-brown complex homolog protein 11 (best arabidopsis hit)	0	4
XP_007158959.1	scaffold10493	171613	175213	+	Leucine rich repeat;Leucine rich repeat N-terminal domain;Protein kinase domain	LRR receptor-like serine/threonine-protein kinase FLS2-like; K13420 LRR receptor-like serine/threonine-protein kinase FLS2 [EC:2.7.11.1]	PRGDB00188951	Gma.57651	Putative_R-Genes,_predicted_from_NCBI_UniGene	Glycine max	RLP	PREDICTED: Glycine max LRR receptor-like serine	0	4
XP_008354068.1-D9	scaffold10493	210773	213622	+	Reverse transcriptase (RNA-dependent DNA polymerase)	60S ribosomal export protein NMD3; K07562 nonsense-mediated mRNA decay protein 3	PRGDB00186672	--	Putative_R-Genes,_collected_from_NCBI_Protein	Arachis hypogaea	NL	Arachis hypogaea clone AHF-205D04 NBS-LRR gene cluster, complete sequence.	0	4
NP_564257.1-D2	scaffold10445	75646	82774	-	Mlo family	MLO-like protein 11-like; K08472 mlo protein	PRGDB00162867	Glyma13g35390.2	Putative_R-Genes,_predicted_from_Pythozome	Glycine max	Mlo-like	Seven transmembrane MLO family protein (best arabidopsis hit)	0	4
XP_004489116.1-D7	scaffold10445	111460	117458	-	Protein phosphatase 2C;Protein tyrosine kinase	chitin elicitor receptor kinase 1-like; K13429 chitin elicitor receptor kinase 1	PRGDB00200844	Bra008427	Putative_R-Genes,_predicted_from_Pythozome	Brassica rapa	RLP	--	2.39e-40	4
XP_007139720.1-D12	scaffold10445	112313	117748	-	Protein phosphatase 2C;Protein tyrosine kinase	chitin elicitor receptor kinase 1-like; K13429 chitin elicitor receptor kinase 1	PRGDB00200844	Bra008427	Putative_R-Genes,_predicted_from_Pythozome	Brassica rapa	RLP	--	2.63e-59	4
XP_004502028.1-D8	scaffold10445	112313	117458	-	Protein phosphatase 2C;Protein tyrosine kinase	chitin elicitor receptor kinase 1-like; K13429 chitin elicitor receptor kinase 1	PRGDB00200844	Bra008427	Putative_R-Genes,_predicted_from_Pythozome	Brassica rapa	RLP	--	2.79e-39	4
XP_014621758.1-D129	scaffold9673	192236	194096	-	Protein tyrosine kinase	Kinase-like protein; K04733 interleukin-1 receptor-associated kinase 4 [EC:2.7.11.1]	PRGDB00081328	Qro.14128	Putative_R-Genes,_predicted_from_NCBI_UniGene	Cucumis sativus	RLK	FN640787 SSH Quercus robur one year old cuttings Quercus robur cDNA clone WZ0AQRAL3YN20FM1, mRNA sequence	2.19e-112	3
NP_172597.2-D133	scaffold9673	236794	239401	-	Protein tyrosine kinase	Kinase-like protein; K04733 interleukin-1 receptor-associated kinase 4 [EC:2.7.11.1]	PRGDB00081328	Qro.14128	Putative_R-Genes,_predicted_from_NCBI_UniGene	Cucumis sativus	RLK	FN640787 SSH Quercus robur one year old cuttings Quercus robur cDNA clone WZ0AQRAL3YN20FM1, mRNA sequence	1.91e-112	3
XP_004499098.1	scaffold9673	275331	279407	-	Arabidopsis broad-spectrum mildew resistance protein RPW8;Disease resistance protein signature;NB-ARC domain	putative disease resistance protein RGA3; K15078 structure-specific endonuclease subunit SLX1 [EC:3.6.1.-]	PRGDB00167461	Medtr1g025080.1	Putative_R-Genes,_predicted_from_Pythozome	Medicago truncatula	RPW8-NL	ADR1-like 1 (best arabidopsis hit)	0	3
XP_002511354.1-D186	scaffold9045	101921	104562	-	Protein kinase domain	probable leucine-rich repeat receptor-like protein kinase At1g68400; K04730 interleukin-1 receptor-associated kinase 1 [EC:2.7.11.1]	PRGDB00169350	Medtr6g083860.1	Putative_R-Genes,_predicted_from_Pythozome	Medicago truncatula	RLP	receptor-like kinase 1 (best arabidopsis hit)	0	3
XP_012574773.1-D2	scaffold9045	169152	225105	+	Leucine rich repeat;Leucine Rich Repeat;Protein kinase domain	Kinase family protein with leucine-rich repeat domain, putative; K00924	PRGDB00188580	Gma.26492	Putative_R-Genes,_predicted_from_NCBI_UniGene	Glycine max	RLP	PREDICTED: Glycine max receptor-like protein kinase HSL1-like (LOC100813894), mRNA	0	3
XP_004512683.1	scaffold9045	221725	229250	+	Leucine rich repeat;Lysine methyltransferase;Protein kinase domain	Kinase family protein with leucine-rich repeat domain, putative; K00924	PRGDB00188580	Gma.26492	Putative_R-Genes,_predicted_from_NCBI_UniGene	Glycine max	RLP	PREDICTED: Glycine max receptor-like protein kinase HSL1-like (LOC100813894), mRNA	0	3
XP_007132072.1	scaffold8997	35417	38809	-	Armadillo/beta-catenin-like repeat;Neurochondrin;U-box domain	U-box domain-containing protein 13-like; K08332 vacuolar protein 8	PRGDB00191296	Lsa.44031	Putative_R-Genes,_predicted_from_NCBI_UniGene	Lactuca sativa	N	TSA: Lactuca sativa CLC_LTR_V1A_17001 mRNA sequence	1.3e-119	3
XP_007150326.1	scaffold8997	98337	100552	+	Protein tyrosine kinase	hypothetical protein; K04733 interleukin-1 receptor-associated kinase 4 [EC:2.7.11.1]	PRGDB00207849	Aquca_027_00169.1	Putative_R-Genes,_predicted_from_Pythozome	Aquilegia coerulea	RLP	--	0	3
XP_003543526.1	scaffold8997	304523	308281	-	Surface antigen	hypothetical protein; K07277 outer membrane protein insertion porin family	PRGDB00201131	Bra018196	Putative_R-Genes,_predicted_from_Pythozome	Brassica rapa	NL	--	0	3
XP_007159118.1	scaffold8661	35820	39582	-	ABC-2 type transporter;ABC transporter	hypothetical protein; K05681 ATP-binding cassette, subfamily G (WHITE), member 2	PRGDB00195568	Phvulv091025840m	Putative_R-Genes,_predicted_from_Pythozome	Phaseolus vulgaris	N	--	0	3
NP_201227.3	scaffold8661	86390	93540	-	CG-1 domain;IPT/TIG domain;IQ calmodulin-binding motif	triosephosphate isomerase-like; K01803 triosephosphate isomerase (TIM) [EC:5.3.1.1]	PRGDB00189864	Hv.35067	Putative_R-Genes,_predicted_from_NCBI_UniGene	Hordeum vulgare	NL	Hordeum vulgare subsp. vulgare mRNA for predicted protein, complete cds, clone: NIASHv2089K17	9.23e-41	3
XP_002513833.1-D4	scaffold8661	694007	697603	+	Protein kinase domain	hypothetical protein; K13414 mitogen-activated protein kinase kinase kinase 1, plant [EC:2.7.11.25]	PRGDB00203590	Carubv10000510m	Putative_R-Genes,_predicted_from_Pythozome	Capsella rubella	Other	--	1.14e-100	3
XP_004488911.1	scaffold8440	14771	18615	-	START domain	-	PRGDB00189168	Gma.63188	Putative_R-Genes,_predicted_from_NCBI_UniGene	Glycine max	RLP	PREDICTED: Glycine max protein STRUBBELIG-RECEPTOR FAMILY 5-like (LOC100785529), mRNA	1.87e-167	3
XP_007147476.1-D104	scaffold8440	172713	174566	-	Leucine rich repeat N-terminal domain;Protein kinase domain	probable LRR receptor-like serine/threonine-protein kinase At4g31250; K04730 interleukin-1 receptor-associated kinase 1 [EC:2.7.11.1]	PRGDB00164519	Glyma17g05560.1	Putative_R-Genes,_predicted_from_Pythozome	Glycine max	RLP	Leucine-rich repeat protein kinase family protein (best arabidopsis hit)	0	3
XP_006593310.1	scaffold8440	231222	236953	+	Beta-ketoacyl synthase, C-terminal domain;Beta-ketoacyl synthase, N-terminal domain	hypothetical protein; K09458 3-oxoacyl-[acyl-carrier-protein] synthase II [EC:2.3.1.179]	PRGDB00217051	MDP0000182032	Putative_R-Genes,_predicted_from_Pythozome	Malus x domestica	T	--	0	3
XP_014620587.1-D3	scaffold838	14431	23638	+	Di-glucose binding within endoplasmic reticulum;Protein tyrosine kinase	hypothetical protein; K04733 interleukin-1 receptor-associated kinase 4 [EC:2.7.11.1]	PRGDB00162237	Glyma12g36190.1	Putative_R-Genes,_predicted_from_Pythozome	Glycine max	RLP	Leucine-rich repeat transmembrane protein kinase (best arabidopsis hit)	0	3
XP_008366451.1-D22	scaffold838	30026	33649	-	Protein tyrosine kinase	POPTRDRAFT_756677; hypothetical protein; K04730 interleukin-1 receptor-associated kinase 1 [EC:2.7.11.1]	PRGDB00068761	Gma.2638	Putative_R-Genes,_predicted_from_NCBI_UniGene	Glycine max	RLP	Glycine max cDNA, clone: GMFL01-05-J08	7.78e-121	3
XP_014620587.1	scaffold838	155688	164699	+	Di-glucose binding within endoplasmic reticulum;Protein tyrosine kinase	hypothetical protein; K04733 interleukin-1 receptor-associated kinase 4 [EC:2.7.11.1]	PRGDB00162237	Glyma12g36190.1	Putative_R-Genes,_predicted_from_Pythozome	Glycine max	RLP	Leucine-rich repeat transmembrane protein kinase (best arabidopsis hit)	0	3
XP_006573553.1	scaffold8340	45515	61028	-	Alpha mannosidase, middle domain;Glycosyl hydrolases family 38 C-terminal domain;Glycosyl hydrolases family 38 N-terminal domain;Mlo family;Senescence-associated protein	lysosomal alpha-mannosidase-like; K01191 alpha-mannosidase [EC:3.2.1.24]	PRGDB00196171	Phvulv091018434m	Putative_R-Genes,_predicted_from_Pythozome	Phaseolus vulgaris	Mlo-like	--	0	3
XP_003548841.1-D2	scaffold8340	45515	61028	-	Alpha mannosidase, middle domain;Glycosyl hydrolases family 38 C-terminal domain;Glycosyl hydrolases family 38 N-terminal domain;Mlo family;Senescence-associated protein	lysosomal alpha-mannosidase-like; K01191 alpha-mannosidase [EC:3.2.1.24]	PRGDB00196171	Phvulv091018434m	Putative_R-Genes,_predicted_from_Pythozome	Phaseolus vulgaris	Mlo-like	--	0	3
XP_004509373.1	scaffold8340	45515	61028	-	Alpha mannosidase, middle domain;Glycosyl hydrolases family 38 C-terminal domain;Glycosyl hydrolases family 38 N-terminal domain;Mlo family;Senescence-associated protein	lysosomal alpha-mannosidase-like; K01191 alpha-mannosidase [EC:3.2.1.24]	PRGDB00196171	Phvulv091018434m	Putative_R-Genes,_predicted_from_Pythozome	Phaseolus vulgaris	Mlo-like	--	6.63e-25	3
XP_003523129.1	scaffold8221	111945	115579	+	Acetyltransferase (GNAT) family;Radical_SAM C-terminal domain;Radical SAM superfamily	elongator complex protein 3-like; K07739 elongator complex protein 3 [EC:2.3.1.48]	PRGDB00214205	MDP0000293207	Putative_R-Genes,_predicted_from_Pythozome	Malus x domestica	CNL	--	5.97e-151	3
XP_006581895.1	scaffold8221	306848	315558	-	Leucine Rich Repeat;Protein kinase domain	leucine-rich repeat receptor-like serine/threonine/tyrosine-protein kinase SOBIR1-like; K04730 interleukin-1 receptor-associated kinase 1 [EC:2.7.11.1]	PRGDB00196763	Phvulv091010248m	Putative_R-Genes,_predicted_from_Pythozome	Phaseolus vulgaris	RLP	--	0	3
XP_007143380.1-D137	scaffold8221	313621	315558	-	Leucine Rich Repeat;Protein kinase domain	leucine-rich repeat receptor-like serine/threonine/tyrosine-protein kinase SOBIR1-like; K04730 interleukin-1 receptor-associated kinase 1 [EC:2.7.11.1]	PRGDB00196763	Phvulv091010248m	Putative_R-Genes,_predicted_from_Pythozome	Phaseolus vulgaris	RLP	--	0	3
XP_006595633.1	scaffold8140	82507	86417	-	EF-hand domain pair;Protein kinase domain	hypothetical protein; K13412 calcium-dependent protein kinase [EC:2.7.11.1]	PRGDB00213743	MDP0000457940	Putative_R-Genes,_predicted_from_Pythozome	Malus x domestica	TNL	--	0	3
XP_007137297.1	scaffold8140	91960	94838	+	Sugar (and other) transporter;Sugar transporter signature	probable inositol transporter 2; K08150 MFS transporter, SP family, solute carrier family 2 (myo-inositol transporter), member 13	PRGDB00216544	MDP0000286805	Putative_R-Genes,_predicted_from_Pythozome	Malus x domestica	TNL	--	1.1e-92	3
XP_004491641.1	scaffold8140	149123	152247	-	PB1 domain;RWP-RK domain	hypothetical protein; K14833 nucleolar complex protein 2	PRGDB00213363	MDP0000265619	Putative_R-Genes,_predicted_from_Pythozome	Malus x domestica	N	--	9.53e-32	3
XP_008345021.1-D525	scaffold7503	55439	63738	-	Protein kinase domain	hypothetical protein; K04733 interleukin-1 receptor-associated kinase 4 [EC:2.7.11.1]	PRGDB00065304	Aan.65268	Putative_R-Genes,_predicted_from_NCBI_UniGene	Artemisia annua	RLK	TSA: Artemisia annua strain Artemis Contig3751.Aylt mRNA sequence	1.15e-25	3
XP_004517199.1	scaffold7503	99022	99456	-	Translation initiation factor 1A / IF-1	Translation initiation factor; K02518 translation initiation factor IF-1	PRGDB00047345	AT4g11430	Putative_R-Genes,_collected_from_NCBI_Protein	Arabidopsis thaliana	TNL	Arabidopsis thaliana DNA chromosome 4, contig fragment No. 31.	7.02e-30	3
XP_004498861.1	scaffold7503	247527	254307	-	Leucine rich repeat;Leucine Rich Repeat;Leucine rich repeat N-terminal domain;Protein kinase domain	putative leucine-rich repeat receptor-like protein kinase family protein; K04733 interleukin-1 receptor-associated kinase 4 [EC:2.7.11.1]	PRGDB00164716	Glyma17g34380.1	Putative_R-Genes,_predicted_from_Pythozome	Glycine max	RLP	Leucine-rich receptor-like protein kinase family protein (best arabidopsis hit)	0	3
XP_003519880.1-D3	scaffold7446	295	1452	-	Leucine rich repeat;Leucine rich repeat N-terminal domain;Leucine-rich repeat signature	Leucine-rich receptor-like protein kinase family protein; K13420 LRR receptor-like serine/threonine-protein kinase FLS2 [EC:2.7.11.1]	PRGWK00000248	MELO3C018480	Contributed_R-Genes	Cucumis melo	RLP	--	1.21e-163	3
XP_012568577.1	scaffold7446	46039	47441	-	UreF	urease accessory protein F-like; K03188 urease accessory protein	PRGDB00216135	MDP0000123760	Putative_R-Genes,_predicted_from_Pythozome	Malus x domestica	CNL	--	5.94e-72	3
XP_003536632.1	scaffold7446	145523	151237	+	ABC-2 type transporter;ABC transporter	hypothetical protein; K05681 ATP-binding cassette, subfamily G (WHITE), member 2	PRGDB00188496	Gma.21807	Putative_R-Genes,_predicted_from_NCBI_UniGene	Glycine max	N	PREDICTED: Glycine max ABC transporter G family member 7-like (LOC100788256), mRNA	0	3
XP_007148134.1	scaffold7158	32925	33638	+	AP2 domain;Ethylene responsive element binding protein signature	ethylene response factor 2; K09286 EREBP-like factor	PRGDB00070731	Mdo.689	Putative_R-Genes,_predicted_from_NCBI_UniGene	Malus x domestica	T	Malus x domestica AP2 domain class transcription factor (AP2D43) mRNA, complete cds	4.99e-30	3
XP_004485812.1	scaffold7158	66369	66962	-	AP2 domain;Ethylene responsive element binding protein signature	ethylene-responsive transcription factor 4-like; K09286 EREBP-like factor	PRGDB00070731	Mdo.689	Putative_R-Genes,_predicted_from_NCBI_UniGene	Malus x domestica	T	Malus x domestica AP2 domain class transcription factor (AP2D43) mRNA, complete cds	4.71e-28	3
XP_003547157.1	scaffold7158	69684	74804	-	Carbohydrate-binding protein of the ER;Leucine rich repeat	hypothetical protein; K16224 senescence-induced receptor-like serine/threonine-protein kinase	PRGDB00066485	At.40910	Putative_R-Genes,_predicted_from_NCBI_UniGene	Arabidopsis thaliana	RLP	Arabidopsis thaliana AtRLP4 (Receptor Like Protein 4); protein binding (AtRLP4) mRNA, complete cds	0	3
XP_002512779.1-D17	scaffold7139	137737	161779	+	Carbohydrate-binding protein of the ER;IBR domain, a half RING-finger domain;Protein kinase domain;Protein tyrosine kinase	hypothetical protein; K16224 senescence-induced receptor-like serine/threonine-protein kinase	PRGDB00163020	Glyma13g42940.1	Putative_R-Genes,_predicted_from_Pythozome	Glycine max	RLP	Leucine-rich repeat transmembrane protein kinase protein (best arabidopsis hit)	2.27e-159	3
XP_002515931.1-D5	scaffold7139	150489	161779	+	Carbohydrate-binding protein of the ER;Leucine rich repeat;Protein kinase domain;Protein tyrosine kinase	hypothetical protein; K16224 senescence-induced receptor-like serine/threonine-protein kinase	PRGDB00167786	Medtr2g121730.1	Putative_R-Genes,_predicted_from_Pythozome	Medicago truncatula	RLP	Leucine-rich repeat transmembrane protein kinase protein (best arabidopsis hit)	6.03e-86	3
XP_012571923.1	scaffold7139	177125	180129	-	Peptidase dimerisation domain;Peptidase family M20/M25/M40	IAA-amino acid hydrolase ILR1-like 4-like; K14664 IAA-amino acid hydrolase [EC:3.5.1.-]	PRGDB00167788	Medtr2g121840.1	Putative_R-Genes,_predicted_from_Pythozome	Medicago truncatula	RLP	Leucine-rich repeat transmembrane protein kinase protein (best arabidopsis hit)	1.14e-68	3
XP_008384620.1-D2	scaffold6938	149049	158820	-	WD40 region of Ge1, enhancer of mRNA-decapping protein	enhancer of mRNA-decapping protein 4-like; K12616 enhancer of mRNA-decapping protein 4	PRGDB00147220	Bradi4g25640.1	Putative_R-Genes,_predicted_from_Pythozome	Ricinus communis	N	Transducin/WD40 repeat-like superfamily protein (best arabidopsis hit); WD domain, G-beta repeat domain containing protein, expressed (best rice hit)	0	3
XP_003530822.2	scaffold6938	211848	220520	-	WD40 region of Ge1, enhancer of mRNA-decapping protein	enhancer of mRNA-decapping protein 4-like; K12616 enhancer of mRNA-decapping protein 4	PRGDB00147220	Bradi4g25640.1	Putative_R-Genes,_predicted_from_Pythozome	Ricinus communis	N	Transducin/WD40 repeat-like superfamily protein (best arabidopsis hit); WD domain, G-beta repeat domain containing protein, expressed (best rice hit)	0	3
XP_007149731.1-D3	scaffold6938	239916	243384	+	Protein of unknown function (DUF1637)	2-aminoethanethiol dioxygenase-like; K10712 cysteamine dioxygenase [EC:1.13.11.19]	PRGDB00192469	Mtr.23140	Putative_R-Genes,_predicted_from_NCBI_UniGene	Medicago truncatula	N	Medicago truncatula NBS-LRR resistance-like protein 4U (MTR_4g080080) mRNA, complete cds	5.28e-59	3
XP_007134960.1	scaffold6754	240273	244184	+	Protein kinase domain	hypothetical protein; K00924	PRGDB00215771	MDP0000180284	Putative_R-Genes,_predicted_from_Pythozome	Malus x domestica	RLP	--	0	3
XP_004506295.1-D8	scaffold6754	418331	422953	+	Protein kinase domain;Salt stress response/antifungal	cysteine-rich receptor-like protein kinase 10; K04730 interleukin-1 receptor-associated kinase 1 [EC:2.7.11.1]	PRGDB00195372	Phvulv091024902m	Putative_R-Genes,_predicted_from_Pythozome	Phaseolus vulgaris	RLK-GNK2	--	0	3
XP_007158656.1-D5	scaffold6754	442604	445977	-	Disease resistance protein signature;NB-ARC domain;TIR domain	Heat shock protein; K03283 heat shock 70kDa protein 1/8; K06758 L1 cell adhesion molecule like protein	PRGDB00162260	Glyma12g36880.1	Putative_R-Genes,_predicted_from_Pythozome	Glycine max	TNL	disease resistance protein (TIR-NBS-LRR class), putative (best arabidopsis hit)	0	3
XP_004485811.1-D2	scaffold6626	259407	262125	+	Carbohydrate-binding protein of the ER;Leucine rich repeat	hypothetical protein; K16224 senescence-induced receptor-like serine/threonine-protein kinase	PRGDB00066485	At.40910	Putative_R-Genes,_predicted_from_NCBI_UniGene	Arabidopsis thaliana	RLP	Arabidopsis thaliana AtRLP4 (Receptor Like Protein 4); protein binding (AtRLP4) mRNA, complete cds	0	3
XP_004485812.1-D2	scaffold6626	263835	264338	+	AP2 domain;Ethylene responsive element binding protein signature	ethylene-responsive transcription factor 4-like; K09286 EREBP-like factor	PRGDB00070731	Mdo.689	Putative_R-Genes,_predicted_from_NCBI_UniGene	Malus x domestica	T	Malus x domestica AP2 domain class transcription factor (AP2D43) mRNA, complete cds	4.41e-28	3
XP_014618496.1-D649	scaffold6626	275067	275549	+	Reverse transcriptase (RNA-dependent DNA polymerase)	hypothetical protein; K06228 fused [EC:2.7.11.1]	PRGDB00217533	Thhalv10011182m	Putative_R-Genes,_predicted_from_Pythozome	Eutrema halophilum	CN	--	1.68e-48	3
NP_181029.1-D2	scaffold6503	62421	78598	-	WRKY DNA -binding domain	WRKY transcription factor 22-like; K13425 WRKY transcription factor 22	PRGDB00203795	Carubv10025744m	Putative_R-Genes,_predicted_from_Pythozome	Capsella rubella	TNL	--	1.42e-29	3
XP_004504735.1	scaffold6503	128420	129181	-	Protein of unknown function (DUF640)	-	PRGDB00179296	Sb05g008160.1	Putative_R-Genes,_predicted_from_Pythozome	Sorghum bicolor	NL	MAP kinase kinase 5 (best arabidopsis hit); resistance protein, putative, expressed (best rice hit)	2.02e-64	3
XP_006580021.1-D3	scaffold6503	177474	189767	-	Protein kinase domain	mitogen-activated protein kinase kinase kinase 1-like; K13414 mitogen-activated protein kinase kinase kinase 1, plant [EC:2.7.11.25]	PRGDB00203590	Carubv10000510m	Putative_R-Genes,_predicted_from_Pythozome	Capsella rubella	Other	--	4.75e-102	3
XP_002531124.1	scaffold6081	178349	181319	-	Aminotransferase class-V	serine-pyruvate aminotransferase, putative (EC:2.6.1.45); K00830 alanine-glyoxylate transaminase / serine-glyoxylate transaminase / serine-pyruvate transaminase [EC:2.6.1.44 2.6.1.45 2.6.1.51]	PRGDB00000481	At1	Reference_R-Genes,_manually_curated	Cucumis melo	Other	Cucumis melo aminotransferase 1 mRNA, complete cds.	0	3
XP_007145234.1-D24	scaffold6081	221384	225761	-	Leucine rich repeat;Leucine Rich Repeat;Leucine-rich repeat signature;Protein kinase domain	receptor protein kinase CLAVATA1; K00924	PRGDB00188851	Gma.48493	Putative_R-Genes,_predicted_from_NCBI_UniGene	Glycine max	RLP	PREDICTED: Glycine max leucine-rich repeat receptor-like serine	0	3
XP_008354068.1-D8	scaffold6081	275056	277905	-	Reverse transcriptase (RNA-dependent DNA polymerase)	60S ribosomal export protein NMD3; K07562 nonsense-mediated mRNA decay protein 3	PRGDB00186672	--	Putative_R-Genes,_collected_from_NCBI_Protein	Arachis hypogaea	NL	Arachis hypogaea clone AHF-205D04 NBS-LRR gene cluster, complete sequence.	0	3
XP_014619646.1	scaffold6047	29717	35824	-	ABC-2 type transporter;ABC transporter	ATP-binding cassette, sub-family G, member 2; K05681 ATP-binding cassette, subfamily G (WHITE), member 2	PRGDB00161648	Glyma11g20220.1	Putative_R-Genes,_predicted_from_Pythozome	Glycine max	N	ABC transporter family protein (best arabidopsis hit)	0	3
XP_007150164.1	scaffold6047	112686	116037	+	ABC-2 type transporter;ABC transporter	hypothetical protein; K05681 ATP-binding cassette, subfamily G (WHITE), member 2	PRGDB00188779	Gma.42211	Putative_R-Genes,_predicted_from_NCBI_UniGene	Glycine max	N	PREDICTED: Glycine max ABC transporter G family member 3-like (LOC100784041), mRNA	0	3
XP_003540199.1-D2	scaffold6047	162522	166211	-	ABC transporter	ABC transporter F family member 1-like; K06185 ATP-binding cassette, subfamily F, member 2	PRGDB00068820	Gma.7643	Putative_R-Genes,_predicted_from_NCBI_UniGene	Glycine max	NL	Glycine max cDNA, clone: GMFL01-41-C06	1.21e-168	3
XP_004510977.1-D15	scaffold5900	73171	78107	-	Leucine rich repeat;Leucine Rich Repeat;Leucine rich repeat N-terminal domain	uncharacterized LOC103648573; K01188 beta-glucosidase [EC:3.2.1.21]	PRGDB00067168	Bna.11253	Putative_R-Genes,_predicted_from_NCBI_UniGene	Brassica napus	RLP	0170389 Brassica napus Flower Brassica napus cDNA, mRNA sequence	1.08e-77	3
NP_001185131.1-D92	scaffold5900	80613	81611	+	Leucine rich repeat;Leucine rich repeat N-terminal domain	uncharacterized LOC103648573; K01188 beta-glucosidase [EC:3.2.1.21]	PRGDB00068071	Csi.40	Putative_R-Genes,_predicted_from_NCBI_UniGene	Citrus sinensis	RLP	C.sinensis mRNA for polygalacturonase-inhibiting protein	1.75e-132	3
NP_201529.1-D7	scaffold5900	201623	205006	-	Leucine rich repeat;Leucine rich repeat N-terminal domain;Protein tyrosine kinase	hypothetical protein; K04730 interleukin-1 receptor-associated kinase 1 [EC:2.7.11.1]	PRGDB00165180	Glyma19g32590.1	Putative_R-Genes,_predicted_from_Pythozome	Glycine max	RLP	Leucine-rich repeat protein kinase family protein (best arabidopsis hit)	0	3
XP_004505181.1-D2	scaffold5797	284700	287371	+	Protein kinase domain	serine/threonine-protein kinase SRK2E; K14498 serine/threonine-protein kinase SRK2 [EC:2.7.11.1]	PRGDB00189827	Hv.34453	Putative_R-Genes,_predicted_from_NCBI_UniGene	Hordeum vulgare	NL	Hordeum vulgare subsp. vulgare mRNA for predicted protein, complete cds, clone: NIASHv2106K13	3.35e-144	3
XP_004498174.1	scaffold5797	305280	312848	-	Leucine rich repeat N-terminal domain	hypothetical protein; K02984 small subunit ribosomal protein S3Ae	PRGDB00066443	At.38466	Putative_R-Genes,_predicted_from_NCBI_UniGene	Arabidopsis thaliana	RLP	Arabidopsis thaliana leucine-rich repeat family protein	1.21e-159	3
XP_002519151.1	scaffold5797	311241	312737	-	Leucine rich repeat N-terminal domain;Proline rich extensin signature	hypothetical protein; K02984 small subunit ribosomal protein S3Ae	PRGWK00000275	MELO3C021193	Contributed_R-Genes	Cucumis melo	RLP	--	3.64e-147	3
XP_012568116.1-D63	scaffold371	5616	8747	+	Leucine rich repeat;Leucine Rich Repeat;Leucine rich repeat N-terminal domain;Protein kinase domain	uncharacterized LOC100216746; K04730 interleukin-1 receptor-associated kinase 1 [EC:2.7.11.1]	PRGDB00155966	Glyma02g10770.1	Putative_R-Genes,_predicted_from_Pythozome	Glycine max	RLP	Leucine-rich receptor-like protein kinase family protein (best arabidopsis hit)	0	3
XP_002524239.1-D27	scaffold371	56806	58788	+	Disease resistance protein signature;NB-ARC domain	putative disease resistance RPP13-like protein 3-like; K13457 disease resistance protein RPM1	PRGDB00165060	Glyma18g51960.1	Putative_R-Genes,_predicted_from_Pythozome	Glycine max	CNL	NB-ARC domain-containing disease resistance protein (best arabidopsis hit)	1.15e-96	3
XP_002524239.1-D14	scaffold371	202214	204739	+	Disease resistance protein signature;NB-ARC domain	putative disease resistance RPP13-like protein 3-like; K13457 disease resistance protein RPM1	PRGDB00165060	Glyma18g51960.1	Putative_R-Genes,_predicted_from_Pythozome	Glycine max	CNL	NB-ARC domain-containing disease resistance protein (best arabidopsis hit)	3.63e-169	3
XP_007154824.1	scaffold3507	36369	37922	+	Ring finger domain	RING-H2 finger protein ATL13-like; K19041 E3 ubiquitin-protein ligase RNF38/44 [EC:2.3.2.27]	PRGDB00183040	GSVIVT01007793001	Putative_R-Genes,_predicted_from_Pythozome	Vitis vinifera	NL	RING/U-box superfamily protein (best arabidopsis hit)	1.69e-37	3
XP_014621758.1-D124	scaffold3507	227537	237644	+	Protein kinase domain;Protein tyrosine kinase;Universal stress protein family	PTI1-like tyrosine-protein kinase At3g15890; K04733 interleukin-1 receptor-associated kinase 4 [EC:2.7.11.1]	PRGDB00064336	Zm.85588	Putative_R-Genes,_predicted_from_NCBI_UniGene	Zea mays	RLK	Zea mays clone Contig355 mRNA sequence	2.71e-132	3
XP_003550669.1	scaffold3507	280489	286433	-	1-deoxy-D-xylulose-5-phosphate synthase;Transketolase, C-terminal domain;Transketolase, pyrimidine binding domain	probable 1-deoxy-D-xylulose-5-phosphate synthase 2, chloroplastic-like; K01662 1-deoxy-D-xylulose-5-phosphate synthase [EC:2.2.1.7]	PRGDB00067001	At.66955	Putative_R-Genes,_predicted_from_NCBI_UniGene	Arabidopsis thaliana	RPW8-NL	Arabidopsis thaliana mRNA for ADR1, complete cds, clone: RAFL15-45-C23	1.59e-115	3
XP_008366485.1-D28	scaffold3289	190746	202510	-	D-mannose binding lectin;PAN-like domain;Protein tyrosine kinase;S-locus glycoprotein domain	G-type lectin S-receptor-like serine/threonine-protein kinase At1g11410; K04733 interleukin-1 receptor-associated kinase 4 [EC:2.7.11.1]	PRGDB00209807	Eucgr.D00886.1	Putative_R-Genes,_predicted_from_Pythozome	Eucalyptus grandis	RLK-GNK2	--	1.04e-116	3
XP_012572623.1-D164	scaffold3289	338982	341019	-	Leucine rich repeat N-terminal domain;Protein kinase domain	probably inactive leucine-rich repeat receptor-like protein kinase At5g48380; K04730 interleukin-1 receptor-associated kinase 1 [EC:2.7.11.1]	PRGDB00068039	Ccl.21635	Putative_R-Genes,_predicted_from_NCBI_UniGene	Citrus clementina	RLP	IC0AAA43AH10RM1 CitNFL Citrus clementina cDNA 5', mRNA sequence	2.2e-74	3
XP_014621758.1-D164	scaffold3289	350362	351261	-	Protein kinase domain	Kinase-like protein; K04730 interleukin-1 receptor-associated kinase 1 [EC:2.7.11.1]	PRGDB00159628	Glyma08g06720.1	Putative_R-Genes,_predicted_from_Pythozome	Glycine max	RLP	BAK1-interacting receptor-like kinase 1 (best arabidopsis hit)	3.48e-131	3
XP_004496756.1	scaffold3200	18363	21622	-	Carbohydrate-binding protein of the ER;Leucine rich repeat N-terminal domain	FRK1; FLG22-induced receptor-like kinase 1; K16224 senescence-induced receptor-like serine/threonine-protein kinase	PRGWK00000202	MELO3C014492	Contributed_R-Genes	Cucumis melo	RLP	--	0	3
XP_004496762.1-D4	scaffold3200	42626	47182	+	alpha/beta hydrolase fold;Protein tyrosine kinase;Salt stress response/antifungal	cysteine-rich receptor-like protein kinase 10; K04730 interleukin-1 receptor-associated kinase 1 [EC:2.7.11.1]	PRGDB00167582	Medtr1g132860.1	Putative_R-Genes,_predicted_from_Pythozome	Medicago truncatula	RLK-GNK2	cysteine-rich RLK (RECEPTOR-like protein kinase) 25 (best arabidopsis hit)	0	3
XP_004506295.1-D13	scaffold3200	296509	302034	+	Protein tyrosine kinase;Salt stress response/antifungal	Cysteine-rich receptor-like protein kinase; K04733 interleukin-1 receptor-associated kinase 4 [EC:2.7.11.1]	PRGDB00161320	Glyma10g39980.1	Putative_R-Genes,_predicted_from_Pythozome	Glycine max	RLK-GNK2	cysteine-rich RLK (RECEPTOR-like protein kinase) 26 (best arabidopsis hit)	2.16e-71	3
XP_014626816.1	scaffold3068	279455	283714	+	Disease resistance protein signature;Leucine Rich Repeat;NB-ARC domain;TIR domain	TMV resistance protein N-like; K19613 leucine-rich repeat protein SHOC2	PRGDB00046910	disease resistance protein	Putative_R-Genes,_collected_from_NCBI_Protein	Phaseolus vulgaris	TNL	Phaseolus vulgaris isolate TL5601 disease resistance protein gene, partial cds.	2.88e-83	3
XP_003525220.1	scaffold3068	287920	297082	-	Disease resistance protein signature;Leucine Rich Repeat;TIR domain;VIT family	hypothetical protein; K19613 leucine-rich repeat protein SHOC2	PRGDB00046910	disease resistance protein	Putative_R-Genes,_collected_from_NCBI_Protein	Phaseolus vulgaris	TNL	Phaseolus vulgaris isolate TL5601 disease resistance protein gene, partial cds.	1.85e-81	3
XP_007160449.1-D2	scaffold3068	292445	297082	-	Disease resistance protein signature;Leucine Rich Repeat;NB-ARC domain;TIR domain	hypothetical protein; K19613 leucine-rich repeat protein SHOC2	PRGDB00155443	Glyma01g03980.1	Putative_R-Genes,_predicted_from_Pythozome	Glycine max	TNL	disease resistance protein (TIR-NBS-LRR class), putative (best arabidopsis hit)	3.04e-56	3
XP_007146952.1	scaffold2921	20692	29089	+	Protein kinase domain;Salt stress response/antifungal	cysteine-rich receptor-like protein kinase 42-like; K04733 interleukin-1 receptor-associated kinase 4 [EC:2.7.11.1]	PRGDB00161720	Glyma11g31990.1	Putative_R-Genes,_predicted_from_Pythozome	Glycine max	RLK-GNK2	cysteine-rich RLK (RECEPTOR-like protein kinase) 42 (best arabidopsis hit)	0	3
XP_004500478.1	scaffold2921	29870	37388	-	Protein tyrosine kinase;Salt stress response/antifungal	cysteine-rich receptor-like protein kinase 42-like; K04733 interleukin-1 receptor-associated kinase 4 [EC:2.7.11.1]	PRGDB00196421	Phvulv091029788m	Putative_R-Genes,_predicted_from_Pythozome	Phaseolus vulgaris	RLK-GNK2	--	0	3
XP_004500478.1-D2	scaffold2921	42561	58194	-	Plant mobile domain;Protein kinase domain;Salt stress response/antifungal	cysteine-rich receptor-like protein kinase 42-like; K04733 interleukin-1 receptor-associated kinase 4 [EC:2.7.11.1]	PRGDB00161722	Glyma11g32070.1	Putative_R-Genes,_predicted_from_Pythozome	Glycine max	RLK-GNK2	cysteine-rich RLK (RECEPTOR-like protein kinase) 2 (best arabidopsis hit)	9.79e-122	3
XP_006584469.1-D2	scaffold21779	51791	54992	+	Protein tyrosine kinase	hypothetical protein; K04733 interleukin-1 receptor-associated kinase 4 [EC:2.7.11.1]	PRGWK00000212	MELO3C015475	Contributed_R-Genes	Cucumis melo	RLK	--	0	3
XP_007135552.1	scaffold21779	55646	76571	-	GMC oxidoreductase;Root hair defective 3 GTP-binding protein (RHD3)	protein HOTHEAD-like; K15403 fatty acid omega-hydroxy dehydrogenase [EC:1.1.-.-]	PRGDB00203535	Carubv10019685m	Putative_R-Genes,_predicted_from_Pythozome	Capsella rubella	CN	--	0	3
XP_003531616.1	scaffold21779	70358	76571	-	Root hair defective 3 GTP-binding protein (RHD3)	-	PRGDB00203535	Carubv10019685m	Putative_R-Genes,_predicted_from_Pythozome	Capsella rubella	CN	--	0	3
XP_002518664.1	scaffold2137	186108	186809	+	Peptidase of plants and bacteria	-	PRGDB00050753	R 11	Putative_R-Genes,_collected_from_NCBI_Protein	Glycine max	TNL	Glycine max cv Williams 82 BAC clone Gm_ISb001_091_F11, complete sequence.	3.45e-106	3
XP_007143060.1	scaffold2137	296631	299247	+	Leucine Rich Repeat;Leucine rich repeat N-terminal domain;Protein kinase domain	LRR receptor-like serine/threonine-protein kinase FLS2; K13420 LRR receptor-like serine/threonine-protein kinase FLS2 [EC:2.7.11.1]	PRGDB00188694	Gma.36627	Putative_R-Genes,_predicted_from_NCBI_UniGene	Glycine max	RLP	PREDICTED: Glycine max receptor protein kinase-like protein At4g34220-like (LOC100820334), partial mRNA	0	3
XP_004496953.1	scaffold2137	300738	305620	+	Domain of unknown function (DUF303);Putative gypsy type transposon	-	PRGDB00188332	Gma.9832	Putative_R-Genes,_predicted_from_NCBI_UniGene	Glycine max	RLP	PREDICTED: Glycine max receptor protein kinase-like protein At4g34220-like (LOC100808248), mRNA	2.33e-105	3
XP_004485770.1-D2	scaffold19279	16292	31987	+	Mlo family	MLO-like protein 11-like; K08472 mlo protein	PRGDB00167262	mgv1a003290m	Putative_R-Genes,_predicted_from_Pythozome	Cucumis x hytivus	Mlo-like	Seven transmembrane MLO family protein (best arabidopsis hit)	4.02e-36	3
XP_002528557.1	scaffold19279	19309	37515	+	Domain of unknown function (DUF1771);Mlo family	MLO-like protein 11-like; K08472 mlo protein	PRGDB00162867	Glyma13g35390.2	Putative_R-Genes,_predicted_from_Pythozome	Glycine max	Mlo-like	Seven transmembrane MLO family protein (best arabidopsis hit)	0	3
XP_006594781.1	scaffold19279	19721	37515	+	Domain of unknown function (DUF1771);Mlo family	MLO-like protein 11-like; K08472 mlo protein	PRGDB00162867	Glyma13g35390.2	Putative_R-Genes,_predicted_from_Pythozome	Glycine max	Mlo-like	Seven transmembrane MLO family protein (best arabidopsis hit)	0	3
XP_007156602.1	scaffold17835	110923	113061	-	Casein kinase II regulatory subunit;Casein kinase II regulatory subunit family signature	casein kinase II subunit beta-like; K03115 casein kinase II subunit beta	PRGDB00182746	107342	Putative_R-Genes,_predicted_from_Pythozome	Ectocarpus siliculosus	N	mitogen-activated protein kinase kinase kinase 7 (best arabidopsis hit)	1.31e-99	3
NP_199519.1-D4	scaffold17835	115576	117394	-	Casein kinase II regulatory subunit;Casein kinase II regulatory subunit family signature	hypothetical protein; K03115 casein kinase II subunit beta	PRGDB00194797	Vca.1757	Putative_R-Genes,_predicted_from_NCBI_UniGene	Volvox carteri	N	Volvox carteri f. nagariensis hypothetical protein, mRNA	6.05e-96	3
XP_004511745.1	scaffold17835	133555	135151	-	EF-hand domain pair;Recoverin family signature	calcineurin B-like protein 1; K06268 serine/threonine-protein phosphatase 2B regulatory subunit	PRGDB00175219	POPTR_0003s08250.1	Putative_R-Genes,_predicted_from_Pythozome	Populus trichocarpa	TNL	transmembrane receptors;ATP binding (best arabidopsis hit)	1.01e-74	3
XP_008337255.1-D5	scaffold1773	85567	89433	+	Domain of unknown function (DUF4219);gag-polypeptide of LTR copia-type;GAG-pre-integrase domain;Integrase core domain;Reverse transcriptase (RNA-dependent DNA polymerase)	uncharacterized LOC103449689; K16570 gamma-tubulin complex component 3	PRGDB00186478	--	Putative_R-Genes,_collected_from_NCBI_Protein	Medicago truncatula	TNL	Medicago truncatula Disease resistance protein (MTR_6g071550) mRNA, complete cds.	8.15e-101	3
XP_007139269.1	scaffold1773	97978	101928	+	3,4-dihydroxy-2-butanone 4-phosphate synthase;GTP cyclohydrolase II;Ribosomal protein L23;Ribosomal protein L23, N-terminal domain	monofunctional riboflavin biosynthesis protein RIBA 3, chloroplastic-like; K14652 3,4-dihydroxy 2-butanone 4-phosphate synthase / GTP cyclohydrolase II [EC:4.1.99.12 3.5.4.25]	PRGDB00186222	GRMZM2G060054_T03	Putative_R-Genes,_predicted_from_Pythozome	Zea mays	CNL	ribosomal protein L23AB (best arabidopsis hit); expressed protein (best rice hit)	8.01e-50	3
XP_002534292.1-D3	scaffold1773	162499	164601	-	Ras family;Transforming protein P21 ras signature	ras-related protein RABE1c; K07901 Ras-related protein Rab-8A	PRGDB00202169	Bra007015	Putative_R-Genes,_predicted_from_Pythozome	Brassica rapa	RLP	--	2.96e-115	3
XP_006607041.1-D65	scaffold1720	101904	102536	+	Reverse transcriptase (RNA-dependent DNA polymerase)	Myosin XI; K10357 myosin V	PRGDB00186672	--	Putative_R-Genes,_collected_from_NCBI_Protein	Arachis hypogaea	NL	Arachis hypogaea clone AHF-205D04 NBS-LRR gene cluster, complete sequence.	3.92e-80	3
XP_006590526.1	scaffold1720	105188	108627	-	Leucine rich repeat;Leucine rich repeat N-terminal domain;Protein tyrosine kinase	hypothetical protein; K04733 interleukin-1 receptor-associated kinase 4 [EC:2.7.11.1]	PRGDB00161415	Glyma11g02690.1	Putative_R-Genes,_predicted_from_Pythozome	Glycine max	RLP	Leucine-rich repeat protein kinase family protein (best arabidopsis hit)	0	3
XP_006573770.1	scaffold1720	122989	127221	-	Glycosyl transferase family 90	KTEL motif-containing protein; K13667 protein glucosyltransferase [EC:2.4.1.-]	PRGDB00158198	Glyma06g02930.1	Putative_R-Genes,_predicted_from_Pythozome	Glycine max	RLP	Leucine-rich receptor-like protein kinase family protein (best arabidopsis hit)	3.14e-34	3
XP_003542059.1-D4	scaffold1713	460644	462944	+	Protein kinase domain;Regulator of chromosome condensation (RCC1) repeat	putative serine/threonine-protein kinase-like protein CCR3; K04730 interleukin-1 receptor-associated kinase 1 [EC:2.7.11.1]	PRGDB00149565	evm.model.supercontig_177.22	Putative_R-Genes,_predicted_from_Pythozome	Arabidopsis lyrata subsp. lyrata	RLP	Leucine-rich receptor-like protein kinase family protein (best arabidopsis hit)	0	3
XP_007151940.1-D80	scaffold1713	464124	483577	-	Leucine Rich Repeat;Plant transposase (Ptta/En/Spm family);Protein kinase domain	hypothetical protein; K00924	PRGDB00161822	Glyma12g00470.1	Putative_R-Genes,_predicted_from_Pythozome	Glycine max	RLP	Leucine-rich receptor-like protein kinase family protein (best arabidopsis hit)	0	3
XP_007155458.1-D27	scaffold1713	464401	467661	-	Leucine Rich Repeat;Leucine rich repeat N-terminal domain;Protein kinase domain	hypothetical protein; K00924	PRGDB00161822	Glyma12g00470.1	Putative_R-Genes,_predicted_from_Pythozome	Glycine max	RLP	Leucine-rich receptor-like protein kinase family protein (best arabidopsis hit)	0	3
XP_012568090.1-D7	scaffold1506	45495	52374	+	Disease resistance protein signature;NB-ARC domain;TIR domain	TMV resistance protein N-like; K19613 leucine-rich repeat protein SHOC2	PRGDB00155563	Glyma01g27440.1	Putative_R-Genes,_predicted_from_Pythozome	Glycine max	TNL	Disease resistance protein (TIR-NBS-LRR class) family (best arabidopsis hit)	8.88e-37	3
XP_012568090.1	scaffold1506	54406	195499	-	Disease resistance protein signature;NB-ARC domain;TIR domain	TMV resistance protein N-like; K19613 leucine-rich repeat protein SHOC2	PRGDB00155566	Glyma01g27460.1	Putative_R-Genes,_predicted_from_Pythozome	Glycine max	TNL	Disease resistance protein (TIR-NBS-LRR class) family (best arabidopsis hit)	0	3
XP_007133979.1-D4	scaffold1506	127431	133595	-	Disease resistance protein signature;NB-ARC domain	TMV resistance protein N-like; K19613 leucine-rich repeat protein SHOC2	PRGDB00155566	Glyma01g27460.1	Putative_R-Genes,_predicted_from_Pythozome	Glycine max	TNL	Disease resistance protein (TIR-NBS-LRR class) family (best arabidopsis hit)	0	3
XP_012570563.1-D16	scaffold14703	79114	80707	+	Reverse transcriptase (RNA-dependent DNA polymerase)	uncharacterized LOC104905624; K05658 ATP-binding cassette, subfamily B (MDR/TAP), member 1 [EC:3.6.3.44]	PRGDB00047409	TIR-NBS-LRR-TIR type disease resistance protein	Putative_R-Genes,_collected_from_NCBI_Protein	Populus trichocarpa	TNL	Populus trichocarpa clone 110301 TIR-NBS-LRR-TIR type disease resistance protein mRNA, partial cds.	2.74e-46	3
XP_002520795.1-D11	scaffold14703	84689	91939	-	LysM domain;Protein kinase domain;Sodium/hydrogen exchanger family	hypothetical protein; K04733 interleukin-1 receptor-associated kinase 4 [EC:2.7.11.1]	PRGWK00000099	MELO3C006481	Contributed_R-Genes	Cucumis melo	RLK	--	0	3
XP_004498011.1	scaffold14703	84689	91939	-	LysM domain;Protein kinase domain;Sodium/hydrogen exchanger family	hypothetical protein; K04733 interleukin-1 receptor-associated kinase 4 [EC:2.7.11.1]	PRGWK00000099	MELO3C006481	Contributed_R-Genes	Cucumis melo	RLK	--	0	3
XP_004497622.1	scaffold1405	97946	102319	+	EF-hand domain pair;Protein kinase domain	calcium-dependent protein kinase 20-like; K13412 calcium-dependent protein kinase [EC:2.7.11.1]	PRGDB00213757	MDP0000162676	Putative_R-Genes,_predicted_from_Pythozome	Malus x domestica	RLP	--	1.37e-168	3
XP_007145759.1	scaffold1405	124662	129652	+	ABC-2 type transporter;ABC transporter	ATP-binding cassette, sub-family G, member 2; K05681 ATP-binding cassette, subfamily G (WHITE), member 2	PRGDB00187647	Gma.56405	Putative_R-Genes,_predicted_from_NCBI_UniGene	Glycine max	N	Glycine max cDNA, clone: GMFL01-18-D08	0	3
XP_004497625.1	scaffold1405	217838	220293	+	Sucrose-6F-phosphate phosphohydrolase;Sucrose-6-phosphate phosphohydrolase C-terminal	hypothetical protein; K14514 ethylene-insensitive protein 3	PRGDB00206399	Lus10012284	Putative_R-Genes,_predicted_from_Pythozome	Linum usitatissimum	N	--	0	3
XP_006607041.1-D211	scaffold13574	13226	13858	+	Reverse transcriptase (RNA-dependent DNA polymerase)	Myosin XI; K10357 myosin V	PRGDB00186672	--	Putative_R-Genes,_collected_from_NCBI_Protein	Arachis hypogaea	NL	Arachis hypogaea clone AHF-205D04 NBS-LRR gene cluster, complete sequence.	1.74e-78	3
XP_002531514.1-D15	scaffold13574	17829	21207	-	Leucine rich repeat;Leucine Rich Repeat;Leucine rich repeat N-terminal domain;Leucine-rich repeat signature;Protein kinase domain	Receptor-like protein kinase; K17422 large subunit ribosomal protein L41	PRGDB00157578	Glyma04g41860.1	Putative_R-Genes,_predicted_from_Pythozome	Glycine max	RLP	Leucine-rich repeat transmembrane protein kinase family protein (best arabidopsis hit)	0	3
XP_008372676.1-D273	scaffold13574	114424	116793	+	Leucine rich repeat;Leucine Rich Repeat;Leucine rich repeat N-terminal domain;Protein tyrosine kinase	Os01g0819100; Similar to predicted protein.; K04733 interleukin-1 receptor-associated kinase 4 [EC:2.7.11.1]	PRGDB00158395	Glyma06g13000.1	Putative_R-Genes,_predicted_from_Pythozome	Glycine max	RLP	Leucine-rich repeat protein kinase family protein (best arabidopsis hit)	0	3
NP_174222.2-D6	scaffold12981	9427	10973	+	WRKY DNA -binding domain	WRKY transcription factor 22-like; K13425 WRKY transcription factor 22	PRGDB00143928	915663	Putative_R-Genes,_predicted_from_Pythozome	Arabidopsis lyrata	NL	Disease resistance protein (TIR-NBS-LRR class) (best arabidopsis hit)	1.15e-32	3
XP_003552736.1-D2	scaffold12981	32651	46850	-	Ring finger domain;TCP-1/cpn60 chaperonin family	T-complex protein 1 subunit zeta-like; K09498 T-complex protein 1 subunit zeta	PRGDB00078682	Vvi.8276	Putative_R-Genes,_predicted_from_NCBI_UniGene	Vitis vinifera	NL	PREDICTED: Vitis vinifera hypothetical protein LOC100250803 (LOC100250803), mRNA	1.76e-104	3
XP_007140922.1	scaffold12981	40630	41820	-	Ring finger domain	RING-H2 finger protein ATL46-like; K19041 E3 ubiquitin-protein ligase RNF38/44 [EC:2.3.2.27]	PRGDB00078682	Vvi.8276	Putative_R-Genes,_predicted_from_NCBI_UniGene	Vitis vinifera	NL	PREDICTED: Vitis vinifera hypothetical protein LOC100250803 (LOC100250803), mRNA	1.12e-150	3
XP_007141880.1	scaffold12821	113265	121802	+	Protein tyrosine kinase	protein kinase APK1A, chloroplastic-like; K04733 interleukin-1 receptor-associated kinase 4 [EC:2.7.11.1]	PRGDB00207849	Aquca_027_00169.1	Putative_R-Genes,_predicted_from_Pythozome	Aquilegia coerulea	RLP	--	1.81e-177	3
XP_006575502.1	scaffold12821	148398	150512	+	RNA recognition motif. (a.k.a. RRM, RBD, or RNP domain)	hypothetical protein; K12900 FUS-interacting serine-arginine-rich protein 1	PRGDB00217252	MDP0000284128	Putative_R-Genes,_predicted_from_Pythozome	Malus x domestica	RLP	--	1.34e-57	3
XP_006595903.1	scaffold12821	173745	178655	+	Leucine-zipper of ternary complex factor MIP1;Protein of unknown function, DUF547	-	PRGDB00217252	MDP0000284128	Putative_R-Genes,_predicted_from_Pythozome	Malus x domestica	RLP	--	0	3
XP_014631284.1-D2	scaffold12777	11975	15071	-	Leucine rich repeat;Protein kinase domain	somatic embryogenesis receptor kinase 2-like; K13418 somatic embryogenesis receptor kinase 1 [EC:2.7.10.1 2.7.11.1]	PRGDB00188278	Gma.5880	Putative_R-Genes,_predicted_from_NCBI_UniGene	Glycine max	RLP	PREDICTED: Glycine max probable LRR receptor-like serine	0	3
XP_006593114.1-D24	scaffold12777	101819	131913	-	Elongation factor G C-terminus;Elongation factor Tu domain 2;Elongation factor Tu GTP binding domain;GTP-binding protein LepA C-terminus;MORN repeat;Myb-like DNA-binding domain;Phosphatidylinositol-4-phosphate 5-Kinase	phosphatidylinositol 4-phosphate 5-kinase 1-like; K00889 1-phosphatidylinositol-4-phosphate 5-kinase [EC:2.7.1.68]	PRGDB00184310	GSVIVT01034283001	Putative_R-Genes,_predicted_from_Pythozome	Vitis vinifera	NL	receptor like protein 14 (best arabidopsis hit)	1.48e-22	3
XP_004503008.1	scaffold12777	115067	124143	-	Elongation factor G C-terminus;Elongation factor Tu domain 2;Elongation factor Tu GTP binding domain;GTP-binding elongation factor signature;GTP-binding protein LepA C-terminus	translation factor GUF1 homolog, chloroplastic; K03596 GTP-binding protein LepA	PRGDB00184310	GSVIVT01034283001	Putative_R-Genes,_predicted_from_Pythozome	Vitis vinifera	NL	receptor like protein 14 (best arabidopsis hit)	1.11e-23	3
XP_003552874.1	scaffold12764	49688	57727	+	Actin;WD domain, G-beta repeat	actin-related protein 5-like; K11672 actin-related protein 5	PRGDB00183702	GSVIVT01023015001	Putative_R-Genes,_predicted_from_Pythozome	Vitis vinifera	NL	NB-ARC domain-containing disease resistance protein (best arabidopsis hit)	6.02e-22	3
XP_004503151.1-D2	scaffold12764	49688	57727	+	Actin;WD domain, G-beta repeat	protein FIZZY-RELATED 3-like; K03364 cell division cycle 20-like protein 1, cofactor of APC complex	PRGDB00183702	GSVIVT01023015001	Putative_R-Genes,_predicted_from_Pythozome	Vitis vinifera	NL	NB-ARC domain-containing disease resistance protein (best arabidopsis hit)	5.99e-22	3
XP_007150326.1-D4	scaffold12764	130711	134923	-	PPR repeat;Protein tyrosine kinase	protein kinase APK1A, chloroplastic-like; K04733 interleukin-1 receptor-associated kinase 4 [EC:2.7.11.1]	PRGDB00207849	Aquca_027_00169.1	Putative_R-Genes,_predicted_from_Pythozome	Aquilegia coerulea	RLP	--	1.28e-170	3
XP_014620667.1	scaffold12426	44848	47363	-	Protein tyrosine kinase	proline-rich receptor-like protein kinase PERK4-like; K04730 interleukin-1 receptor-associated kinase 1 [EC:2.7.11.1]	PRGDB00217566	Thhalv10011979m	Putative_R-Genes,_predicted_from_Pythozome	Eutrema halophilum	RLP	--	2.29e-136	3
NP_001236567.1	scaffold12426	48338	53268	-	Leucine-rich repeat	leucine-rich repeat family protein; K18647 acidic leucine-rich nuclear phosphoprotein 32 family member B	PRGWK00001382	Sotub03g006550.1.1	Contributed_R-Genes	Solanum tuberosum	L	--	2.14e-103	3
XP_007156032.1	scaffold12426	48338	53268	-	Leucine-rich repeat	leucine-rich repeat family protein; K18647 acidic leucine-rich nuclear phosphoprotein 32 family member B	PRGWK00001382	Sotub03g006550.1.1	Contributed_R-Genes	Solanum tuberosum	L	--	2.14e-103	3
XP_006607041.1-D7	scaffold11640	286821	287453	+	Reverse transcriptase (RNA-dependent DNA polymerase)	Myosin XI; K10357 myosin V	PRGDB00186672	--	Putative_R-Genes,_collected_from_NCBI_Protein	Arachis hypogaea	NL	Arachis hypogaea clone AHF-205D04 NBS-LRR gene cluster, complete sequence.	2.85e-82	3
XP_014629841.1	scaffold11640	382045	384203	-	Protein tyrosine kinase;Tyrosine kinase catalytic domain signature	protein kinase, putative (EC:2.7.10.2); K17535 serine/threonine-protein kinase TNNI3K [EC:2.7.11.1]	PRGDB00216122	MDP0000283975	Putative_R-Genes,_predicted_from_Pythozome	Malus x domestica	RLK	--	7.74e-164	3
XP_003523101.1	scaffold11640	390351	393197	-	Leucine rich repeat;Leucine-rich repeat signature	hypothetical protein; K19613 leucine-rich repeat protein SHOC2	PRGWK00000359	MELO3C026254	Contributed_R-Genes	Cucumis melo	RLP	--	0	3
XP_007145463.1	scaffold1159	20183	32954	-	HEAT repeats;Protein kinase domain	serine/threonine-protein kinase TIO-like; K06228 fused [EC:2.7.11.1]	PRGDB00189037	Gma.60863	Putative_R-Genes,_predicted_from_NCBI_UniGene	Glycine max	CN	PREDICTED: Glycine max probable serine	0	3
XP_004504077.1-D5	scaffold1159	264307	271582	-	Ankyrin repeats (3 copies);CG-1 domain;IPT/TIG domain;IQ calmodulin-binding motif	-	PRGDB00189864	Hv.35067	Putative_R-Genes,_predicted_from_NCBI_UniGene	Hordeum vulgare	NL	Hordeum vulgare subsp. vulgare mRNA for predicted protein, complete cds, clone: NIASHv2089K17	2.88e-47	3
XP_004500708.1	scaffold1159	351290	353624	-	PGAP1-like protein	-	PRGDB00200874	Bra023631	Putative_R-Genes,_predicted_from_Pythozome	Brassica rapa	TNL	--	1.25e-102	3
XP_007150032.1-D5	scaffold1142	23772	32871	+	Leucine rich repeat;Leucine rich repeat N-terminal domain;Protein tyrosine kinase	probable receptor protein kinase TMK1; K17285 selenium-binding protein 1	PRGDB00187677	Gma.9607	Putative_R-Genes,_predicted_from_NCBI_UniGene	Glycine max	RLP	Glycine max cultivar Essex Rhg4-like receptor kinase II (Rhg4) mRNA, complete cds	0	3
XP_004504367.1	scaffold1142	119836	121955	+	Serine hydroxymethyltransferase	SHMT; serine hydroxymethyltransferase 2; K00600 glycine hydroxymethyltransferase [EC:2.1.2.1]	PRGDB00214085	MDP0000194411	Putative_R-Genes,_predicted_from_Pythozome	Malus x domestica	N	--	2.76e-33	3
XP_004510758.1-D87	scaffold1142	252659	256233	-	Disease resistance protein signature;NB-ARC domain;TIR domain	TMV resistance protein N-like; K19613 leucine-rich repeat protein SHOC2	PRGDB00162030	Glyma12g15850.1	Putative_R-Genes,_predicted_from_Pythozome	Glycine max	TNL	disease resistance protein (TIR-NBS-LRR class), putative (best arabidopsis hit)	1.88e-52	3
XP_004512416.1-D3	scaffold11242	175957	181452	-	Mob1/phocein family;NmrA-like family	MOB kinase activator-like 1-like; K06685 MOB kinase activator 1	PRGDB00049562	mob1/phocein family protein	Putative_R-Genes,_collected_from_NCBI_Protein	Arabidopsis thaliana	NL	Arabidopsis thaliana mob1/phocein family protein (AT4G19050) mRNA, complete cds.	1.71e-129	3
XP_014634585.1-D2	scaffold11242	221332	228079	+	Leucine rich repeat;Leucine rich repeat N-terminal domain;Protein kinase domain	hypothetical protein; K04730 interleukin-1 receptor-associated kinase 1 [EC:2.7.11.1]	PRGDB00196363	Phvulv091004422m	Putative_R-Genes,_predicted_from_Pythozome	Phaseolus vulgaris	RLP	--	0	3
XP_003547824.1	scaffold11242	231277	234519	-	Bacterial extracellular solute-binding protein;Bacterial periplasmic spermidine/putrescine-binding protein signature	-	PRGDB00206361	Lus10033291	Putative_R-Genes,_predicted_from_Pythozome	Linum usitatissimum	RLP	--	0	3
XP_004496523.1-D27	scaffold1120	316152	318382	+	Leucine rich repeat;Leucine rich repeat N-terminal domain;Protein kinase domain	Os01g0819100; Similar to predicted protein.; K04733 interleukin-1 receptor-associated kinase 4 [EC:2.7.11.1]	PRGDB00192355	Mtr.13764	Putative_R-Genes,_predicted_from_NCBI_UniGene	Medicago truncatula	RLP	Medicago truncatula Atypical receptor-like kinase MARK (MTR_8g107470) mRNA, complete cds	0	3
XP_003530965.1	scaffold1120	336244	343106	-	-	hypothetical protein; K10411 dynein light chain 1, axonemal	PRGWK00001427	Sotub03g032100.1.1	Contributed_R-Genes	Solanum tuberosum	L	--	4.86e-135	3
XP_014617136.1-D549	scaffold1120	425016	426111	-	Reverse transcriptase (RNA-dependent DNA polymerase)	uncharacterized LOC100245431; K05387 glutamate receptor, ionotropic, plant	PRGDB00217533	Thhalv10011182m	Putative_R-Genes,_predicted_from_Pythozome	Eutrema halophilum	CN	--	1.15e-32	3
XP_012573917.1-D55	scaffold10384	38340	38819	+	TIR domain	uncharacterized LOC101313743; K07466 replication factor A1	PRGDB00169881	Medtr8g034210.1	Putative_R-Genes,_predicted_from_Pythozome	Medicago truncatula	T	Disease resistance protein (TIR-NBS-LRR class) family (best arabidopsis hit)	7.15e-66	3
XP_004513533.1-D2	scaffold10384	75793	76540	-	Cupin;Germin signature	uncharacterized LOC101250545; K11426 SET and MYND domain-containing protein	PRGWK00000444	Solyc01g102880.1.1	Contributed_R-Genes	Solanum lycopersicum	TNL-OT	--	6.6e-65	3
NP_566483.1-D59	scaffold10384	79868	84020	-	Subtilase family	peptidase, putative (EC:3.4.21.25); K18443 golgi-specific brefeldin A-resistance guanine nucleotide exchange factor 1	PRGDB00214989	MDP0000481805	Putative_R-Genes,_predicted_from_Pythozome	Malus x domestica	N	--	3.64e-85	3
XP_003535621.1	scaffold10053	234114	237932	+	Leucine rich repeat;Leucine Rich Repeat;Leucine rich repeat N-terminal domain;Leucine-rich repeat signature;Protein kinase domain	Leucine-rich receptor-like protein kinase family protein; K13415 protein brassinosteroid insensitive 1 [EC:2.7.10.1 2.7.11.1]	PRGDB00188770	Gma.41211	Putative_R-Genes,_predicted_from_NCBI_UniGene	Glycine max	RLP	PREDICTED: Glycine max leucine-rich repeat receptor protein kinase EXS-like (LOC100808726), mRNA	0	3
XP_007143437.1	scaffold10053	441092	448559	+	Protein tyrosine kinase;U-box domain	U-box domain-containing protein 33-like; K04730 interleukin-1 receptor-associated kinase 1 [EC:2.7.11.1]	PRGDB00196286	Phvulv091023284m	Putative_R-Genes,_predicted_from_Pythozome	Phaseolus vulgaris	CN	--	0	3
XP_004496545.1	scaffold10053	456203	456952	+	-	-	PRGDB00215944	MDP0000282838	Putative_R-Genes,_predicted_from_Pythozome	Malus x domestica	CN	--	1.2e-105	3
XP_007146379.1	scaffold99	193003	196404	-	Plant mobile domain	uncharacterized LOC100251525; K04460 serine/threonine-protein phosphatase 5 [EC:3.1.3.16]	PRGDB00215267	MDP0000256952	Putative_R-Genes,_predicted_from_Pythozome	Malus x domestica	RLP	--	0	2
XP_006602236.1	scaffold99	205537	212558	-	Calcineurin-like phosphoesterase;PPP5 TPR repeat region;Serine/threonine phosphatase family signature;Tetratricopeptide repeat;TPR repeat	serine/threonine-protein phosphatase 5; K04460 serine/threonine-protein phosphatase 5 [EC:3.1.3.16]	PRGDB00215267	MDP0000256952	Putative_R-Genes,_predicted_from_Pythozome	Malus x domestica	RLP	--	0	2
XP_002531163.1-D7	scaffold9749	75409	84661	-	Protein kinase domain;Ras family;Transforming protein P21 ras signature	hypothetical protein; K04730 interleukin-1 receptor-associated kinase 1 [EC:2.7.11.1]	PRGDB00065209	Aan.49419	Putative_R-Genes,_predicted_from_NCBI_UniGene	Artemisia annua	RLK	TSA: Artemisia annua strain Artemis Contig10132.Aylt mRNA sequence	7.87e-67	2
XP_007153592.1-D3	scaffold9749	75409	84661	-	Protein kinase domain;Ras family	hypothetical protein; K04730 interleukin-1 receptor-associated kinase 1 [EC:2.7.11.1]	PRGDB00065209	Aan.49419	Putative_R-Genes,_predicted_from_NCBI_UniGene	Artemisia annua	RLK	TSA: Artemisia annua strain Artemis Contig10132.Aylt mRNA sequence	8.61e-67	2
XP_004513532.1	scaffold9733	21483	22531	+	Cupin;Germin signature	uncharacterized LOC101250545; K11426 SET and MYND domain-containing protein	PRGDB00182795	GSVIVT01000058001	Putative_R-Genes,_predicted_from_Pythozome	Vitis vinifera	RLP	Leucine-rich repeat protein kinase family protein (best arabidopsis hit)	4.47e-81	2
XP_006607041.1-D85	scaffold9733	29861	30469	-	Reverse transcriptase (RNA-dependent DNA polymerase)	Myosin XI; K10357 myosin V	PRGDB00186672	--	Putative_R-Genes,_collected_from_NCBI_Protein	Arachis hypogaea	NL	Arachis hypogaea clone AHF-205D04 NBS-LRR gene cluster, complete sequence.	6.35e-79	2
XP_002527144.1	scaffold9506	132048	142977	-	Pentatricopeptide repeat domain;PPR repeat;PPR repeat family;Transmembrane amino acid transporter protein	hypothetical protein; K08832 serine/threonine-protein kinase SRPK3 [EC:2.7.11.1]	PRGDB00214610	MDP0000288298	Putative_R-Genes,_predicted_from_Pythozome	Malus x domestica	TNL	--	2.26e-109	2
XP_006590754.1	scaffold9506	143715	145825	+	Protein phosphatase 2C	probable protein phosphatase 2C 47-like; K14803 protein phosphatase 2C homolog 2/3 [EC:3.1.3.16]	PRGDB00213421	MDP0000280399	Putative_R-Genes,_predicted_from_Pythozome	Malus x domestica	RLP	--	1.13e-164	2
NP_181272.1	scaffold9413	52844	55081	+	ABC-2 type transporter;ABC transporter	ppabcg30; ATP-binding cassette transporter, subfamily G, member 30, group WBC protein PpABCG30; K05681 ATP-binding cassette, subfamily G (WHITE), member 2	PRGDB00169715	Medtr7g120490.1	Putative_R-Genes,_predicted_from_Pythozome	Medicago truncatula	N	ABC-2 type transporter family protein (best arabidopsis hit)	0	2
XP_006607041.1-D145	scaffold9413	56923	57555	-	Reverse transcriptase (RNA-dependent DNA polymerase)	Myosin XI; K10357 myosin V	PRGDB00186672	--	Putative_R-Genes,_collected_from_NCBI_Protein	Arachis hypogaea	NL	Arachis hypogaea clone AHF-205D04 NBS-LRR gene cluster, complete sequence.	3.04e-78	2
XP_004496997.1-D8	scaffold9401	152508	155498	-	ATPase family associated with various cellular activities (AAA);BRO1-like domain	ALG-2 interacting protein X-like; K12200 programmed cell death 6-interacting protein	PRGDB00201975	Bra036845	Putative_R-Genes,_predicted_from_Pythozome	Brassica rapa	CNL	--	2.53e-27	2
NP_568357.1-D22	scaffold9401	335508	335831	+	ATPase family associated with various cellular activities (AAA)	probable mitochondrial chaperone BCS1-B; K08900 mitochondrial chaperone BCS1	PRGDB00201975	Bra036845	Putative_R-Genes,_predicted_from_Pythozome	Brassica rapa	CNL	--	2.01e-38	2
XP_007155042.1	scaffold9297	20403	22749	-	Protein tyrosine kinase	Protein kinase 2B; K04733 interleukin-1 receptor-associated kinase 4 [EC:2.7.11.1]	PRGDB00078803	Vvi.12916	Putative_R-Genes,_predicted_from_NCBI_UniGene	Vitis vinifera	N	PREDICTED: Vitis vinifera hypothetical protein LOC100262734 (LOC100262734), mRNA	8.2e-164	2
XP_007155065.1	scaffold9297	311988	318208	+	Protein tyrosine kinase	calmodulin-binding receptor-like cytoplasmic kinase 3; K04730 interleukin-1 receptor-associated kinase 1 [EC:2.7.11.1]	PRGDB00215709	MDP0000189221	Putative_R-Genes,_predicted_from_Pythozome	Malus x domestica	Other	--	7.49e-180	2
XP_002523183.1-D47	scaffold9285	64634	67600	+	Leucine rich repeat N-terminal domain;Protein kinase domain	Os01g0819100; Similar to predicted protein.; K04733 interleukin-1 receptor-associated kinase 4 [EC:2.7.11.1]	PRGDB00070231	Lja.6287	Putative_R-Genes,_predicted_from_NCBI_UniGene	Lotus japonicus	RLP	Lotus japonicus cDNA, clone: LjFL1-063-AF12, HTC	0	2
XP_004508548.1	scaffold9285	501093	502136	-	Triose-phosphate Transporter family	GDP-mannose transporter GONST4; K15356 GDP-mannose transporter	PRGDB00216098	MDP0000255220	Putative_R-Genes,_predicted_from_Pythozome	Malus x domestica	TNL	--	0	2
XP_007155215.1-D2	scaffold9232	110068	110505	-	Translation initiation factor 1A / IF-1	Translation initiation factor; K02518 translation initiation factor IF-1	PRGDB00047345	AT4g11430	Putative_R-Genes,_collected_from_NCBI_Protein	Arabidopsis thaliana	TNL	Arabidopsis thaliana DNA chromosome 4, contig fragment No. 31.	1.15e-28	2
XP_007161007.1	scaffold9232	155827	164278	+	Ethylene-responsive protein kinase Le-CTR1;Protein tyrosine kinase	hypothetical protein; K04424 sterile alpha motif and leucine zipper containing kinase AZK [EC:2.7.11.25]	PRGWK00000005	MELO3C002125	Contributed_R-Genes	Cucumis melo	RLK	--	1.04e-111	2
XP_008375855.1-D33	scaffold9198	82896	83744	+	Endonuclease/Exonuclease/phosphatase family	Protein transport protein Sec24-like protein; K14007 protein transport protein SEC24	PRGDB00186672	--	Putative_R-Genes,_collected_from_NCBI_Protein	Arachis hypogaea	NL	Arachis hypogaea clone AHF-205D04 NBS-LRR gene cluster, complete sequence.	2.77e-149	2
XP_006607041.1-D135	scaffold9198	84367	84690	+	-	Myosin XI; K10357 myosin V	PRGDB00186672	--	Putative_R-Genes,_collected_from_NCBI_Protein	Arachis hypogaea	NL	Arachis hypogaea clone AHF-205D04 NBS-LRR gene cluster, complete sequence.	8.66e-48	2
XP_006607041.1-D115	scaffold9033	81940	82572	+	Reverse transcriptase (RNA-dependent DNA polymerase)	Myosin XI; K10357 myosin V	PRGDB00186672	--	Putative_R-Genes,_collected_from_NCBI_Protein	Arachis hypogaea	NL	Arachis hypogaea clone AHF-205D04 NBS-LRR gene cluster, complete sequence.	1.27e-77	2
XP_007132725.1	scaffold9033	112658	121404	+	Amidohydrolase family	dihydroorotase, mitochondrial-like; K01465 dihydroorotase [EC:3.5.2.3]	PRGDB00201538	Bra013661	Putative_R-Genes,_predicted_from_Pythozome	Brassica rapa	RLK-GNK2	--	0	2
XP_007138299.1-D3	scaffold8994	25358	33122	-	Leucine rich repeat;Leucine rich repeat N-terminal domain;Protein kinase domain;SMC proteins Flexible Hinge Domain	structural maintenance of chromosomes protein 3-like; K06669 structural maintenance of chromosome 3 (chondroitin sulfate proteoglycan 6)	PRGDB00168943	Medtr5g094420.1	Putative_R-Genes,_predicted_from_Pythozome	Medicago truncatula	RLP	PEP1 receptor 2 (best arabidopsis hit)	0	2
XP_012571762.1	scaffold8994	91926	92846	-	Protein of unknown function (DUF3148)	-	PRGDB00192500	Mtr.24179	Putative_R-Genes,_predicted_from_NCBI_UniGene	Medicago truncatula	TNL	Medicago truncatula Tir-nbs-lrr resistance protein (MTR_3g079780) mRNA, complete cds	1.58e-31	2
XP_006590324.1-D2	scaffold8968	295548	310926	+	Leucine-rich repeat signature	hypothetical protein; K04730 interleukin-1 receptor-associated kinase 1 [EC:2.7.11.1]	PRGDB00068337	Ghi.1573	Putative_R-Genes,_predicted_from_NCBI_UniGene	Gossypium hirsutum	RLP	G.hir-Cotyledon 112 cDNA from Cotyledons Gossypium hirsutum cDNA, mRNA sequence	5.92e-112	2
XP_014632539.1-D206	scaffold8968	297155	302136	+	Leucine-rich repeat signature;Plant mobile domain	hypothetical protein; K04730 interleukin-1 receptor-associated kinase 1 [EC:2.7.11.1]	PRGDB00068337	Ghi.1573	Putative_R-Genes,_predicted_from_NCBI_UniGene	Gossypium hirsutum	RLP	G.hir-Cotyledon 112 cDNA from Cotyledons Gossypium hirsutum cDNA, mRNA sequence	3.07e-112	2
XP_004509177.1-D2	scaffold8921	28215	40556	+	Disease resistance protein signature;NB-ARC domain	uncharacterized LOC103401427; K13415 protein brassinosteroid insensitive 1 [EC:2.7.10.1 2.7.11.1]	PRGDB00069007	Gma.22530	Putative_R-Genes,_predicted_from_NCBI_UniGene	Glycine max	CNL	Glycine max cDNA, clone: GMFL01-22-N04	0	2
XP_007155963.1	scaffold8921	69195	73428	+	Disease resistance protein signature;NB-ARC domain	uncharacterized LOC103401427; K13415 protein brassinosteroid insensitive 1 [EC:2.7.10.1 2.7.11.1]	PRGDB00195315	Phvulv091016442m	Putative_R-Genes,_predicted_from_Pythozome	Phaseolus vulgaris	CNL	--	0	2
XP_008373271.1-D17	scaffold8868	100130	101104	+	ABC-2 type transporter	ppabcg12; ATP-binding cassette transporter, subfamily G, member 12, group WBC protein PpABCG12; K05681 ATP-binding cassette, subfamily G (WHITE), member 2	PRGDB00162362	Glyma13g07990.1	Putative_R-Genes,_predicted_from_Pythozome	Glycine max	N	white-brown complex homolog protein 11 (best arabidopsis hit)	4.38e-126	2
XP_003532610.2-D4	scaffold8868	101596	120420	-	ABC-2 type transporter;ABC transporter	hypothetical protein; K05681 ATP-binding cassette, subfamily G (WHITE), member 2	PRGDB00159664	Glyma08g07580.1	Putative_R-Genes,_predicted_from_Pythozome	Glycine max	N	white-brown complex homolog protein 11 (best arabidopsis hit)	0	2
XP_002528881.1-D71	scaffold877	182144	296768	+	Protein kinase domain;S-locus glycoprotein domain	POPTRDRAFT_762394; hypothetical protein; K04730 interleukin-1 receptor-associated kinase 1 [EC:2.7.11.1]	PRGWK00000034	MELO3C003147	Contributed_R-Genes	Cucumis melo	RLK	--	4.88e-123	2
NP_196345.1-D122	scaffold877	274919	278521	+	Leucine rich repeat;Leucine rich repeat N-terminal domain;Protein kinase domain	probable receptor protein kinase TMK1; K00924	PRGDB00196627	Phvulv091022869m	Putative_R-Genes,_predicted_from_Pythozome	Phaseolus vulgaris	RLP	--	0	2
XP_014631657.1	scaffold872	352230	356037	-	Protein of unknown function (DUF1637)	2-aminoethanethiol dioxygenase-like; K10712 cysteamine dioxygenase [EC:1.13.11.19]	PRGDB00192469	Mtr.23140	Putative_R-Genes,_predicted_from_NCBI_UniGene	Medicago truncatula	N	Medicago truncatula NBS-LRR resistance-like protein 4U (MTR_4g080080) mRNA, complete cds	3.06e-122	2
XP_007132829.1	scaffold872	470565	473343	+	Protein kinase domain	shaggy-related protein kinase zeta-like; K14502 protein brassinosteroid insensitive 2 [EC:2.7.11.1]	PRGDB00215771	MDP0000180284	Putative_R-Genes,_predicted_from_Pythozome	Malus x domestica	RLP	--	0	2
XP_007140939.1-D2	scaffold8667	159027	161610	-	Protein kinase domain	hypothetical protein; K08286 protein-serine/threonine kinase [EC:2.7.11.-]	PRGDB00216033	MDP0000314577	Putative_R-Genes,_predicted_from_Pythozome	Malus x domestica	RLP	--	1.46e-90	2
XP_004502257.1-D30	scaffold8667	725619	727896	+	-	probable receptor protein kinase TMK1; K17285 selenium-binding protein 1	PRGDB00157934	Glyma05g28350.1	Putative_R-Genes,_predicted_from_Pythozome	Glycine max	RLP	Leucine-rich repeat protein kinase family protein (best arabidopsis hit)	2.45e-116	2
XP_003555426.1-D8	scaffold8619	86077	88445	-	ABC-2 type transporter;ABC transporter	ATP-binding cassette, sub-family G, member 2; K05681 ATP-binding cassette, subfamily G (WHITE), member 2	PRGDB00162604	Glyma13g25240.1	Putative_R-Genes,_predicted_from_Pythozome	Glycine max	N	ABC-2 type transporter family protein (best arabidopsis hit)	0	2
XP_007148204.1-D2	scaffold8619	115631	116481	-	TIR domain	Heat shock protein; K03283 heat shock 70kDa protein 1/8; K06758 L1 cell adhesion molecule like protein	PRGDB00159298	Glyma07g31240.1	Putative_R-Genes,_predicted_from_Pythozome	Glycine max	T	Toll-Interleukin-Resistance (TIR) domain family protein (best arabidopsis hit)	1.7e-112	2
XP_007135116.1	scaffold8560	58604	58984	+	Histone-like transcription factor (CBF/NF-Y) and archaeal histone	nuclear transcription factor Y subunit C-9-like; K08066 nuclear transcription factor Y, gamma	PRGDB00176268	29656.m000483	Putative_R-Genes,_predicted_from_Pythozome	Oryza barthii	Mlo-like	Seven transmembrane MLO family protein (best arabidopsis hit)	1.75e-27	2
XP_012572623.1-D65	scaffold8560	132912	135915	+	PAN-like domain;Protein tyrosine kinase;S-locus glycoprotein domain	hypothetical protein; K04733 interleukin-1 receptor-associated kinase 4 [EC:2.7.11.1]	PRGDB00209807	Eucgr.D00886.1	Putative_R-Genes,_predicted_from_Pythozome	Eucalyptus grandis	RLK-GNK2	--	1.95e-109	2
XP_006590663.1	scaffold8481	249851	253129	+	Arabidopsis broad-spectrum mildew resistance protein RPW8;Disease resistance protein signature;NB-ARC domain	uncharacterized LOC103401427; K13415 protein brassinosteroid insensitive 1 [EC:2.7.10.1 2.7.11.1]	PRGDB00195026	Phvulv091012050m	Putative_R-Genes,_predicted_from_Pythozome	Phaseolus vulgaris	CNL	--	0	2
NP_201489.1-D2	scaffold8481	255958	259827	-	Protein kinase domain	Serine/threonine protein kinase SAPK3; K14498 serine/threonine-protein kinase SRK2 [EC:2.7.11.1]	PRGDB00189827	Hv.34453	Putative_R-Genes,_predicted_from_NCBI_UniGene	Hordeum vulgare	NL	Hordeum vulgare subsp. vulgare mRNA for predicted protein, complete cds, clone: NIASHv2106K13	7.99e-138	2
NP_001242819.1	scaffold8439	76816	78913	-	N-terminal domain of oxidoreductase;Zinc-binding dehydrogenase	hypothetical protein; K08070 2-alkenal reductase [EC:1.3.1.74]	PRGDB00078525	Vvi.774	Putative_R-Genes,_predicted_from_NCBI_UniGene	Vitis vinifera	RLP	PREDICTED: Vitis vinifera hypothetical protein LOC100251471 (LOC100251471), mRNA	1.74e-162	2
XP_004485915.1-D122	scaffold8439	422982	426456	+	Leucine rich repeat;Leucine-rich repeat signature;Protein kinase domain	receptor serine/threonine kinase, putative; K04730 interleukin-1 receptor-associated kinase 1 [EC:2.7.11.1]	PRGDB00165401	Glyma20g25240.1	Putative_R-Genes,_predicted_from_Pythozome	Glycine max	RLP	Protein kinase superfamily protein (best arabidopsis hit)	7.49e-119	2
XP_003548219.1-D2	scaffold8271	192076	196395	+	LIM-domain binding protein	peroxisomal (S)-2-hydroxy-acid oxidase GLO5-like; K11517 (S)-2-hydroxy-acid oxidase [EC:1.1.3.15]	PRGDB00217351	MDP0000726867	Putative_R-Genes,_predicted_from_Pythozome	Malus x domestica	CNL	--	0	2
XP_003548219.1	scaffold8271	200321	204745	+	LIM-domain binding protein	peroxisomal (S)-2-hydroxy-acid oxidase GLO5-like; K11517 (S)-2-hydroxy-acid oxidase [EC:1.1.3.15]	PRGDB00217351	MDP0000726867	Putative_R-Genes,_predicted_from_Pythozome	Malus x domestica	CNL	--	0	2
XP_002525698.1	scaffold8260	165755	168049	-	Protein of unknown function DUF260	hypothetical protein; K13944	PRGDB00213803	MDP0000322059	Putative_R-Genes,_predicted_from_Pythozome	Malus x domestica	RLP	--	2.91e-64	2
XP_002525699.1-D2	scaffold8260	203349	207120	-	Leucine rich repeat;Protein tyrosine kinase	LRR receptor-like serine/threonine-protein kinase EFR; K13420 LRR receptor-like serine/threonine-protein kinase FLS2 [EC:2.7.11.1]	PRGDB00196772	Phvulv091008939m	Putative_R-Genes,_predicted_from_Pythozome	Phaseolus vulgaris	RLP	--	0	2
XP_012573917.1-D2	scaffold8237	212995	215250	-	TIR domain	hypothetical protein; K19613 leucine-rich repeat protein SHOC2	PRGDB00192328	Mtr.12511	Putative_R-Genes,_predicted_from_NCBI_UniGene	Medicago truncatula	T	Medicago truncatula TMV resistance protein N (MTR_5g037710) mRNA, complete cds	1.58e-108	2
XP_012573917.1	scaffold8237	222833	224058	-	TIR domain	TMV resistance protein N-like; K19613 leucine-rich repeat protein SHOC2	PRGDB00070382	Lja.18116	Putative_R-Genes,_predicted_from_NCBI_UniGene	Lotus japonicus	T	FS321090 LjFL3 Lotus japonicus cDNA clone LjFL3-009-AG11 5', mRNA sequence	1.31e-118	2
XP_004493836.1	scaffold8160	56785	59712	-	Aromatic-L-amino-acid decarboxylase signature;Pyridoxal-dependent decarboxylase conserved domain	Tyrosine decarboxylase; K01592 tyrosine decarboxylase [EC:4.1.1.25]	PRGDB00214154	MDP0000259421	Putative_R-Genes,_predicted_from_Pythozome	Malus x domestica	N	--	0	2
XP_006585572.1-D9	scaffold8160	77138	84916	-	ABC-2 type transporter;ABC transporter;ABC-transporter extracellular N-terminal;Plant PDR ABC transporter associated	ppabcg30; ATP-binding cassette transporter, subfamily G, member 30, group WBC protein PpABCG30; K05681 ATP-binding cassette, subfamily G (WHITE), member 2	PRGDB00156829	Glyma03g32520.1	Putative_R-Genes,_predicted_from_Pythozome	Glycine max	CN	pleiotropic drug resistance 12 (best arabidopsis hit)	0	2
XP_002518685.1-D253	scaffold8138	290565	291029	+	Leucine rich repeat N-terminal domain	POPTRDRAFT_1075175; FLAGELLIN-SENSITIVE 2 family protein; K13420 LRR receptor-like serine/threonine-protein kinase FLS2 [EC:2.7.11.1]	PRGDB00195348	Phvulv091023480m	Putative_R-Genes,_predicted_from_Pythozome	Phaseolus vulgaris	RLP	--	1.45e-56	2
XP_014618140.1-D483	scaffold8138	391231	391533	-	Reverse transcriptase (RNA-dependent DNA polymerase)	Myosin XI; K10357 myosin V	PRGDB00186672	--	Putative_R-Genes,_collected_from_NCBI_Protein	Arachis hypogaea	NL	Arachis hypogaea clone AHF-205D04 NBS-LRR gene cluster, complete sequence.	7.61e-36	2
XP_006606283.1	scaffold8030	88191	92599	+	Galactose oxidase, central domain	hypothetical protein; K14966 host cell factor	PRGDB00200719	Bra005270	Putative_R-Genes,_predicted_from_Pythozome	Brassica rapa	CNL	--	5.32e-92	2
XP_007143816.1	scaffold8030	136889	145881	-	ABC-2 type transporter;ABC transporter;ABC-transporter extracellular N-terminal;Plant PDR ABC transporter associated	hypothetical protein; K05681 ATP-binding cassette, subfamily G (WHITE), member 2	PRGDB00188620	Gma.28897	Putative_R-Genes,_predicted_from_NCBI_UniGene	Glycine max	N	PREDICTED: Glycine max ABC transporter G family member 39-like (LOC100786666), mRNA	0	2
NP_196345.1-D17	scaffold7882	38006	48199	+	Leucine rich repeat;Leucine Rich Repeat;Leucine rich repeat N-terminal domain;Protein kinase domain	Leucine-rich repeat protein kinase family protein, putative; K13420 LRR receptor-like serine/threonine-protein kinase FLS2 [EC:2.7.11.1]	PRGDB00167286	AC159090_29.1	Putative_R-Genes,_predicted_from_Pythozome	Medicago truncatula	RLP	Leucine-rich repeat protein kinase family protein (best arabidopsis hit)	0	2
XP_002515218.1-D10	scaffold7882	241279	242109	+	Protein kinase domain	glycogen synthase kinase-3 homolog MsK-3; K03083 glycogen synthase kinase 3 beta [EC:2.7.11.26]	PRGDB00215524	MDP0000250138	Putative_R-Genes,_predicted_from_Pythozome	Malus x domestica	RLP	--	8.65e-85	2
XP_007144019.1-D3	scaffold783	141672	142226	+	Protein of unknown function (DUF640)	-	PRGDB00149355	clementine0.9_000252m	Putative_R-Genes,_predicted_from_Pythozome	Citrus clementina	CNL	NB-ARC domain-containing disease resistance protein (best arabidopsis hit)	1.41e-65	2
NP_196862.1-D5	scaffold783	339285	341561	+	ABC-2 type transporter;ABC transporter	ppabcg30; ATP-binding cassette transporter, subfamily G, member 30, group WBC protein PpABCG30; K05681 ATP-binding cassette, subfamily G (WHITE), member 2	PRGDB00142526	AcoGoldSmith_v1.016798m	Putative_R-Genes,_predicted_from_Pythozome	Gossypium arboreum	N	ABC-2 type transporter family protein (best arabidopsis hit)	0	2
XP_006607041.1-D98	scaffold7609	48521	48967	-	Reverse transcriptase (RNA-dependent DNA polymerase)	Myosin XI; K10357 myosin V	PRGDB00186672	--	Putative_R-Genes,_collected_from_NCBI_Protein	Arachis hypogaea	NL	Arachis hypogaea clone AHF-205D04 NBS-LRR gene cluster, complete sequence.	9.15e-48	2
XP_004511618.1-D2	scaffold7609	51583	53562	+	Staygreen protein	proteinaceous RNase P 1, chloroplastic/mitochondrial-like; K18213 proteinaceous RNase P [EC:3.1.26.5]	PRGDB00201520	Bra013656	Putative_R-Genes,_predicted_from_Pythozome	Brassica rapa	RLK-GNK2	--	2.48e-101	2
XP_003544226.1	scaffold7517	84519	85550	+	Ring finger domain	hypothetical protein; K10664 E3 ubiquitin-protein ligase ATL6/9/15/31/42/55 [EC:2.3.2.27]	PRGDB00191694	Lsa.50102	Putative_R-Genes,_predicted_from_NCBI_UniGene	Lactuca sativa	N	TSA: Lactuca sativa Letassy_X1_3887 mRNA sequence	4.04e-25	2
XP_004501681.1-D3	scaffold7517	171905	172819	+	Ring finger domain	hypothetical protein; K10664 E3 ubiquitin-protein ligase ATL6/9/15/31/42/55 [EC:2.3.2.27]	PRGDB00191694	Lsa.50102	Putative_R-Genes,_predicted_from_NCBI_UniGene	Lactuca sativa	N	TSA: Lactuca sativa Letassy_X1_3887 mRNA sequence	8.42e-27	2
XP_006578442.1-D3	scaffold7392	52489	62469	+	Thioredoxin-like	Nucleoredoxin; K17609 nucleoredoxin [EC:1.8.1.8]	PRGDB00196102	Phvulv091020202m	Putative_R-Genes,_predicted_from_Pythozome	Phaseolus vulgaris	RLP	--	2.12e-26	2
NP_564756.1-D3	scaffold7392	52489	62469	+	Thioredoxin-like	Nucleoredoxin; K17609 nucleoredoxin [EC:1.8.1.8]	PRGDB00196102	Phvulv091020202m	Putative_R-Genes,_predicted_from_Pythozome	Phaseolus vulgaris	RLP	--	2.12e-26	2
XP_008346337.1-D24	scaffold7304	162626	165453	+	ABC transporter	uncharacterized LOC100500671; K12593 M-phase phosphoprotein 6, animal type	PRGDB00075701	Pvu.8636	Putative_R-Genes,_predicted_from_NCBI_UniGene	Phaseolus vulgaris	N	Pv024B_M13F_C10.ab1 Phaseolus vulgaris cv Early gallatin Phaseolus vulgaris cDNA, mRNA sequence	1.3e-94	2
XP_007162607.1-D6	scaffold7304	176020	180906	-	Aromatic-L-amino-acid decarboxylase signature;Pyridoxal-dependent decarboxylase conserved domain	tyrosine decarboxylase 1; K01592 tyrosine decarboxylase [EC:4.1.1.25]	PRGDB00214154	MDP0000259421	Putative_R-Genes,_predicted_from_Pythozome	Malus x domestica	N	--	5.45e-69	2
XP_004497046.1-D94	scaffold7235	152261	155210	+	Leucine rich repeat;Leucine rich repeat N-terminal domain;Protein kinase domain	probable inactive receptor kinase At2g26730; K04730 interleukin-1 receptor-associated kinase 1 [EC:2.7.11.1]	PRGDB00195848	Phvulv091030399m	Putative_R-Genes,_predicted_from_Pythozome	Phaseolus vulgaris	RLP	--	0	2
XP_008379270.1	scaffold7235	156383	157531	+	Ring finger domain	RING-H2 finger protein ATL46-like; K19041 E3 ubiquitin-protein ligase RNF38/44 [EC:2.3.2.27]	PRGDB00078682	Vvi.8276	Putative_R-Genes,_predicted_from_NCBI_UniGene	Vitis vinifera	NL	PREDICTED: Vitis vinifera hypothetical protein LOC100250803 (LOC100250803), mRNA	1.27e-141	2
XP_012567754.1-D268	scaffold72	254432	254794	+	Reverse transcriptase (RNA-dependent DNA polymerase)	uncharacterized LOC104905624; K05658 ATP-binding cassette, subfamily B (MDR/TAP), member 1 [EC:3.6.3.44]	PRGDB00188818	Gma.45040	Putative_R-Genes,_predicted_from_NCBI_UniGene	Glycine max	NL	PREDICTED: Glycine max putative disease resistance protein At4g11170-like (LOC100803552), mRNA	3.63e-32	2
XP_004490408.1	scaffold72	341184	343260	-	-	protein TRANSPORT INHIBITOR RESPONSE 1-like; K14485 transport inhibitor response 1	PRGWK00001610	Sotub04g029700.1.1	Contributed_R-Genes	Solanum tuberosum	RLP	--	8.4e-98	2
XP_007131450.1-D34	scaffold6903	102179	112172	+	NB-ARC domain	putative disease resistance RPP13-like protein 3-like; K13457 disease resistance protein RPM1	PRGDB00188329	Gma.9560	Putative_R-Genes,_predicted_from_NCBI_UniGene	Glycine max	CNL	PREDICTED: Glycine max putative disease resistance protein At1g50180-like (LOC100814688), mRNA	1e-94	2
XP_002519633.1-D14	scaffold6903	171707	177568	-	Fructose-bisphosphate aldolase class-I;Protein kinase domain	probable fructose-bisphosphate aldolase 3, chloroplastic; K01623 fructose-bisphosphate aldolase, class I [EC:4.1.2.13]	PRGDB00188569	Gma.26168	Putative_R-Genes,_predicted_from_NCBI_UniGene	Glycine max	N	PREDICTED: Glycine max serine	4.86e-28	2
XP_012572486.1-D86	scaffold6895	9581	50740	-	Protein kinase domain	hypothetical protein; K04730 interleukin-1 receptor-associated kinase 1 [EC:2.7.11.1]	PRGDB00141957	AcoGoldSmith_v1.017924m	Putative_R-Genes,_predicted_from_Pythozome	Gossypium arboreum	RLP	Leucine-rich repeat receptor-like protein kinase family protein (best arabidopsis hit)	8.5e-143	2
NP_172597.2-D136	scaffold6895	89222	92576	-	Protein tyrosine kinase;Wall-associated receptor kinase C-terminal	probable receptor-like protein kinase At1g67000-like; K04730 interleukin-1 receptor-associated kinase 1 [EC:2.7.11.1]	PRGDB00141957	AcoGoldSmith_v1.017924m	Putative_R-Genes,_predicted_from_Pythozome	Gossypium arboreum	RLP	Leucine-rich repeat receptor-like protein kinase family protein (best arabidopsis hit)	1.03e-130	2
XP_002530120.1-D152	scaffold6830	6330	9777	+	Leucine rich repeat;Protein tyrosine kinase	probable inactive receptor kinase At5g10020; K04730 interleukin-1 receptor-associated kinase 1 [EC:2.7.11.1]	PRGDB00188777	Gma.41856	Putative_R-Genes,_predicted_from_NCBI_UniGene	Glycine max	RLP	PREDICTED: Glycine max probable LRR receptor-like serine	0	2
XP_014624276.1-D139	scaffold6830	115026	156201	-	PPR repeat;PPR repeat family	hypothetical protein; K17964 leucine-rich PPR motif-containing protein, mitochondrial	PRGDB00213456	MDP0000287771	Putative_R-Genes,_predicted_from_Pythozome	Malus x domestica	RLP	--	2.3e-40	2
NP_191196.1-D117	scaffold6681	144777	148764	+	Leucine rich repeat;Leucine rich repeat N-terminal domain;Protein tyrosine kinase	BRASSINOSTEROID INSENSITIVE 1-associated receptor kinase 1-like; K13416 brassinosteroid insensitive 1-associated receptor kinase 1 [EC:2.7.10.1 2.7.11.1]	PRGDB00155723	Glyma01g42100.1	Putative_R-Genes,_predicted_from_Pythozome	Glycine max	RLP	Leucine-rich repeat protein kinase family protein (best arabidopsis hit)	0	2
XP_002526889.1-D243	scaffold6681	144777	148764	+	Leucine rich repeat;Leucine rich repeat N-terminal domain;Protein tyrosine kinase	BRASSINOSTEROID INSENSITIVE 1-associated receptor kinase 1-like; K13416 brassinosteroid insensitive 1-associated receptor kinase 1 [EC:2.7.10.1 2.7.11.1]	PRGDB00155723	Glyma01g42100.1	Putative_R-Genes,_predicted_from_Pythozome	Glycine max	RLP	Leucine-rich repeat protein kinase family protein (best arabidopsis hit)	0	2
XP_004490767.1-D2	scaffold6663	5207	37338	+	Disease resistance protein signature;NB-ARC domain	hypothetical protein; K13459 disease resistance protein RPS2	PRGDB00195639	Phvulv091018789m	Putative_R-Genes,_predicted_from_Pythozome	Phaseolus vulgaris	CNL	--	6.55e-31	2
XP_007143329.1-D129	scaffold6663	122875	126950	+	Leucine rich repeat N-terminal domain;Protein kinase domain	hypothetical protein; K13418 somatic embryogenesis receptor kinase 1 [EC:2.7.10.1 2.7.11.1]	PRGDB00188452	Gma.19492	Putative_R-Genes,_predicted_from_NCBI_UniGene	Glycine max	RLP	PREDICTED: Glycine max protein NSP-INTERACTING KINASE 1-like, transcript variant 1 (LOC100806650), mRNA	0	2
XP_004497215.1	scaffold6625	8779	19832	-	Protein tyrosine kinase	protein kinase, putative (EC:2.7.10.2); K17535 serine/threonine-protein kinase TNNI3K [EC:2.7.11.1]	PRGDB00213874	MDP0000290680	Putative_R-Genes,_predicted_from_Pythozome	Malus x domestica	RLP	--	0	2
XP_003555849.1	scaffold6625	45372	48235	-	F-box domain	hypothetical protein; K10268 F-box and leucine-rich repeat protein 2/20	PRGDB00213874	MDP0000290680	Putative_R-Genes,_predicted_from_Pythozome	Malus x domestica	RLP	--	1.26e-115	2
XP_004512553.1-D10	scaffold6486	215939	227868	+	Serine hydroxymethyltransferase	serine hydroxymethyltransferase, mitochondrial-like; K00600 glycine hydroxymethyltransferase [EC:2.1.2.1]	PRGDB00214085	MDP0000194411	Putative_R-Genes,_predicted_from_Pythozome	Malus x domestica	N	--	1.51e-35	2
XP_006607041.1-D195	scaffold6486	336250	336696	-	Reverse transcriptase (RNA-dependent DNA polymerase)	Myosin XI; K10357 myosin V	PRGDB00186672	--	Putative_R-Genes,_collected_from_NCBI_Protein	Arachis hypogaea	NL	Arachis hypogaea clone AHF-205D04 NBS-LRR gene cluster, complete sequence.	1.47e-47	2
XP_003539634.1-D2	scaffold6319	125802	128378	-	Carbohydrate-binding protein of the ER;Protein tyrosine kinase	probable receptor-like protein kinase At5g24010; K04730 interleukin-1 receptor-associated kinase 1 [EC:2.7.11.1]	PRGWK00000462	Solyc01g109950.1.1	Contributed_R-Genes	Solanum lycopersicum	Pto-like	--	0	2
XP_008379019.1	scaffold6319	226019	233232	-	Glycosyl hydrolase family 9;Mlo family	endoglucanase 25; K08472 mlo protein	PRGDB00167676	Medtr2g034050.1	Putative_R-Genes,_predicted_from_Pythozome	Medicago truncatula	Mlo-like	Seven transmembrane MLO family protein (best arabidopsis hit)	1.46e-159	2
XP_004517105.2-D14	scaffold6285	162505	199665	+	Carbohydrate-binding protein of the ER;Protein kinase domain;Protein tyrosine kinase	hypothetical protein; K16224 senescence-induced receptor-like serine/threonine-protein kinase	PRGDB00192174	Mtr.4320	Putative_R-Genes,_predicted_from_NCBI_UniGene	Medicago truncatula	RLP	Medicago truncatula Receptor-like protein kinase (MTR_8g014930) mRNA, complete cds	6.17e-65	2
XP_014633910.1-D4	scaffold6285	170859	199665	+	Carbohydrate-binding protein of the ER;Leucine rich repeat;Protein tyrosine kinase	hypothetical protein; K04733 interleukin-1 receptor-associated kinase 4 [EC:2.7.11.1]	PRGDB00169823	Medtr8g016500.1	Putative_R-Genes,_predicted_from_Pythozome	Medicago truncatula	RLP	Leucine-rich repeat transmembrane protein kinase protein (best arabidopsis hit)	9.4e-156	2
NP_181467.1-D8	scaffold6189	297653	299962	-	ABC-2 type transporter;ABC transporter	ppabcg12; ATP-binding cassette transporter, subfamily G, member 12, group WBC protein PpABCG12; K05681 ATP-binding cassette, subfamily G (WHITE), member 2	PRGDB00195777	Phvulv091009910m	Putative_R-Genes,_predicted_from_Pythozome	Phaseolus vulgaris	N	--	0	2
XP_003531771.1	scaffold6189	361426	362502	+	Protein kinase domain	Mitogen-activated protein kinase kinase; K13413 mitogen-activated protein kinase kinase 4/5, plant [EC:2.7.12.2]	PRGDB00179296	Sb05g008160.1	Putative_R-Genes,_predicted_from_Pythozome	Sorghum bicolor	NL	MAP kinase kinase 5 (best arabidopsis hit); resistance protein, putative, expressed (best rice hit)	5.06e-112	2
XP_012568090.1-D92	scaffold6157	220828	229524	+	Disease resistance protein signature;NB-ARC domain;TIR domain	Heat shock protein; K03283 heat shock 70kDa protein 1/8; K06758 L1 cell adhesion molecule like protein	PRGDB00069461	Gma.58567	Putative_R-Genes,_predicted_from_NCBI_UniGene	Glycine max	TNL	Glycine max cultivar McCall Rj2	0	2
XP_002518865.1-D3	scaffold6157	457732	460283	-	70kDa heat shock protein signature;Hsp70 protein	Heat shock protein 70 (Hsp 70) family protein; K09490 heat shock 70kDa protein 5	PRGDB00167710	Medtr2g047020.1	Putative_R-Genes,_predicted_from_Pythozome	Medicago truncatula	TNL	heat shock cognate protein 70-1 (best arabidopsis hit)	1.77e-163	2
XP_008377011.1-D256	scaffold6099	90344	92931	+	Leucine rich repeat;Leucine Rich Repeat;Leucine rich repeat N-terminal domain;Leucine-rich repeat signature;Protein kinase domain	Os01g0819100; Similar to predicted protein.; K04733 interleukin-1 receptor-associated kinase 4 [EC:2.7.11.1]	PRGDB00188204	Gma.846	Putative_R-Genes,_predicted_from_NCBI_UniGene	Glycine max	RLP	PREDICTED: Glycine max probable inactive receptor kinase At5g58300-like (LOC100796675), mRNA	0	2
XP_007140062.1-D2	scaffold6099	178727	181423	-	Carbohydrate-binding protein of the ER;Protein tyrosine kinase	Kinase-like protein; K04730 interleukin-1 receptor-associated kinase 1 [EC:2.7.11.1]	PRGDB00201990	Bra036791	Putative_R-Genes,_predicted_from_Pythozome	Brassica rapa	TNL	--	0	2
XP_007148192.1-D2	scaffold6042	34448	36333	+	Clathrin light chain	uncharacterized LOC103425117; K07870 Ras homolog gene family, member T1	PRGDB00217007	MDP0000579910	Putative_R-Genes,_predicted_from_Pythozome	Malus x domestica	RLP	--	9.84e-72	2
XP_007159310.1	scaffold6042	37826	40789	-	Protein tyrosine kinase	probable LRR receptor-like serine/threonine-protein kinase At1g53440-like; K04733 interleukin-1 receptor-associated kinase 4 [EC:2.7.11.1]	PRGDB00174166	ppa001211m	Putative_R-Genes,_predicted_from_Pythozome	Prunus persica	RLP	Leucine-rich repeat transmembrane protein kinase (best arabidopsis hit)	5.52e-111	2
XP_008347843.1-D293	scaffold5952	113352	113741	+	-	hypothetical protein; K15078 structure-specific endonuclease subunit SLX1 [EC:3.6.1.-]	PRGDB00192490	Mtr.23996	Putative_R-Genes,_predicted_from_NCBI_UniGene	Medicago truncatula	NL	Medicago truncatula NBS-LRR resistance protein (MTR_6g047210) mRNA, complete cds	6.11e-44	2
XP_006594611.1	scaffold5952	180955	191785	-	Leucine Rich Repeat;Leucine-rich repeat signature;Protein tyrosine kinase	hypothetical protein; K04730 interleukin-1 receptor-associated kinase 1 [EC:2.7.11.1]	PRGDB00194982	Phvulv091014932m	Putative_R-Genes,_predicted_from_Pythozome	Phaseolus vulgaris	RLP	--	0	2
XP_014617136.1-D621	scaffold5893	105821	118357	+	Reverse transcriptase (RNA-dependent DNA polymerase)	hypothetical protein; K06228 fused [EC:2.7.11.1]	PRGDB00217533	Thhalv10011182m	Putative_R-Genes,_predicted_from_Pythozome	Eutrema halophilum	CN	--	3.43e-43	2
XP_014617136.1-D509	scaffold5893	133678	134807	+	Reverse transcriptase (RNA-dependent DNA polymerase)	uncharacterized LOC100245431; K05387 glutamate receptor, ionotropic, plant	PRGDB00217533	Thhalv10011182m	Putative_R-Genes,_predicted_from_Pythozome	Eutrema halophilum	CN	--	8.83e-32	2
XP_007154043.1-D6	scaffold5883	129211	134001	-	Heavy-metal-associated domain	hypothetical protein; K04733 interleukin-1 receptor-associated kinase 4 [EC:2.7.11.1]	PRGDB00080958	Pvr.18172	Putative_R-Genes,_predicted_from_NCBI_UniGene	Saccharum hybrid cultivar	RLK	CCGG5871.g1 CCGG Panicum virgatum late flowering buds + seed development (H) Panicum virgatum cDNA clone CCGG5871 3', mRNA sequence	1.21e-26	2
XP_006601749.1-D16	scaffold5883	132302	145875	+	Serine hydroxymethyltransferase	serine hydroxymethyltransferase, mitochondrial-like; K00600 glycine hydroxymethyltransferase [EC:2.1.2.1]	PRGDB00214085	MDP0000194411	Putative_R-Genes,_predicted_from_Pythozome	Malus x domestica	N	--	1.55e-33	2
XP_006575266.1-D2	scaffold5696	173803	177011	+	ABC-2 type transporter;ABC transporter	ATP-binding cassette, sub-family G, member 2; K05681 ATP-binding cassette, subfamily G (WHITE), member 2	PRGDB00187647	Gma.56405	Putative_R-Genes,_predicted_from_NCBI_UniGene	Glycine max	N	Glycine max cDNA, clone: GMFL01-18-D08	0	2
XP_006588885.1	scaffold5696	353187	371221	-	EF-hand domain pair;Protein kinase domain	calcium-dependent protein kinase 1-like; K13412 calcium-dependent protein kinase [EC:2.7.11.1]	PRGDB00213757	MDP0000162676	Putative_R-Genes,_predicted_from_Pythozome	Malus x domestica	RLP	--	1.28e-158	2
XP_003525183.1	scaffold5643	82246	85643	+	ABC-2 type transporter;ABC transporter	ppabcg12; ATP-binding cassette transporter, subfamily G, member 12, group WBC protein PpABCG12; K05681 ATP-binding cassette, subfamily G (WHITE), member 2	PRGDB00196762	Phvulv091008848m	Putative_R-Genes,_predicted_from_Pythozome	Phaseolus vulgaris	N	--	0	2
XP_004502857.1-D54	scaffold5643	189772	192311	-	Leucine rich repeat N-terminal domain;Protein kinase domain	Os01g0819100; Similar to predicted protein.; K04733 interleukin-1 receptor-associated kinase 4 [EC:2.7.11.1]	PRGDB00196303	Phvulv091011235m	Putative_R-Genes,_predicted_from_Pythozome	Phaseolus vulgaris	RLP	--	0	2
XP_012570563.1-D21	scaffold5558	63517	65112	+	Reverse transcriptase (RNA-dependent DNA polymerase)	uncharacterized LOC104905624; K05658 ATP-binding cassette, subfamily B (MDR/TAP), member 1 [EC:3.6.3.44]	PRGDB00047409	TIR-NBS-LRR-TIR type disease resistance protein	Putative_R-Genes,_collected_from_NCBI_Protein	Populus trichocarpa	TNL	Populus trichocarpa clone 110301 TIR-NBS-LRR-TIR type disease resistance protein mRNA, partial cds.	5.45e-46	2
XP_014627750.1	scaffold5558	283462	286367	+	Mitochondrial PGP phosphatase	hypothetical protein; K01094 phosphatidylglycerophosphatase GEP4 [EC:3.1.3.27]	PRGDB00212998	MDP0000127305	Putative_R-Genes,_predicted_from_Pythozome	Malus x domestica	RLP	--	5.05e-112	2
XP_007161986.1-D5	scaffold5507	22047	37733	+	ABC1 family;Phosphoribulokinase / Uridine kinase family;Uridine kinase signature	uncharacterized aarF domain-containing protein kinase At1g79600, chloroplastic-like; K13457 disease resistance protein RPM1	PRGDB00078970	Vvi.20745	Putative_R-Genes,_predicted_from_NCBI_UniGene	Vitis vinifera	CNL	PREDICTED: Vitis vinifera hypothetical protein LOC100252764 (LOC100252764), mRNA	1.44e-94	2
XP_003542175.1-D2	scaffold5507	28723	33569	+	ABC1 family	uncharacterized aarF domain-containing protein kinase At1g79600, chloroplastic-like; K13457 disease resistance protein RPM1	PRGDB00078970	Vvi.20745	Putative_R-Genes,_predicted_from_NCBI_UniGene	Vitis vinifera	CNL	PREDICTED: Vitis vinifera hypothetical protein LOC100252764 (LOC100252764), mRNA	5.62e-113	2
XP_003553372.1	scaffold5473	178884	181092	-	Protein of unknown function DUF260	hypothetical protein; K13944	PRGDB00213803	MDP0000322059	Putative_R-Genes,_predicted_from_Pythozome	Malus x domestica	RLP	--	4.34e-65	2
XP_002525699.1	scaffold5473	184952	188826	-	Leucine rich repeat;Protein tyrosine kinase	LRR receptor-like serine/threonine-protein kinase EFR; K13420 LRR receptor-like serine/threonine-protein kinase FLS2 [EC:2.7.11.1]	PRGDB00196355	Phvulv091001224m	Putative_R-Genes,_predicted_from_Pythozome	Phaseolus vulgaris	RLP	--	0	2
XP_002517677.1-D4	scaffold5432	265990	299045	-	Leucine rich repeat;Leucine rich repeat N-terminal domain;Protein kinase domain	probable LRR receptor-like serine/threonine-protein kinase At3g47570; K13420 LRR receptor-like serine/threonine-protein kinase FLS2 [EC:2.7.11.1]	PRGDB00163261	Glyma14g06580.1	Putative_R-Genes,_predicted_from_Pythozome	Glycine max	RLP	Leucine-rich repeat protein kinase family protein (best arabidopsis hit)	0	2
NP_193747.2-D48	scaffold5432	459824	472108	-	Leucine rich repeat;Leucine Rich Repeat;Protein kinase domain	Leucine-rich repeat protein kinase family protein, putative; K13420 LRR receptor-like serine/threonine-protein kinase FLS2 [EC:2.7.11.1]	PRGDB00163261	Glyma14g06580.1	Putative_R-Genes,_predicted_from_Pythozome	Glycine max	RLP	Leucine-rich repeat protein kinase family protein (best arabidopsis hit)	0	2
XP_007160537.1	scaffold5316	113324	134322	-	Adenine nucleotide translocator signature;Mitochondrial carrier protein;Mitochondrial carrier protein signature;Root hair defective 3 GTP-binding protein (RHD3)	ADP,ATP carrier protein ER-ANT1; K05863 solute carrier family 25 (mitochondrial adenine nucleotide translocator), member 4/5/6/31	PRGDB00203535	Carubv10019685m	Putative_R-Genes,_predicted_from_Pythozome	Capsella rubella	CN	--	3.28e-90	2
XP_014617339.1	scaffold5316	117767	127106	-	Root hair defective 3 GTP-binding protein (RHD3)	-	PRGDB00203535	Carubv10019685m	Putative_R-Genes,_predicted_from_Pythozome	Capsella rubella	CN	--	0	2
XP_007161789.1-D33	scaffold5294	22325	25144	-	Glycosyl hydrolases family 16	hypothetical protein; K08235 xyloglucan:xyloglucosyl transferase [EC:2.4.1.207]	PRGDB00188562	Gma.25716	Putative_R-Genes,_predicted_from_NCBI_UniGene	Glycine max	RLP	PREDICTED: Glycine max protein NSP-INTERACTING KINASE 1-like (LOC100797768), mRNA	1.78e-34	2
XP_014626645.1-D39	scaffold5294	23060	23785	-	-	hypothetical protein; K13418 somatic embryogenesis receptor kinase 1 [EC:2.7.10.1 2.7.11.1]	PRGDB00165051	Glyma18g51330.1	Putative_R-Genes,_predicted_from_Pythozome	Glycine max	RLP	NSP-interacting kinase 1 (best arabidopsis hit)	9.72e-71	2
XP_007132725.1-D2	scaffold5113	66305	75451	+	Amidohydrolase family	dihydroorotase, mitochondrial-like; K01465 dihydroorotase [EC:3.5.2.3]	PRGDB00201538	Bra013661	Putative_R-Genes,_predicted_from_Pythozome	Brassica rapa	RLK-GNK2	--	0	2
XP_006598006.1	scaffold5113	249741	254504	+	Leucine rich repeat;Protein tyrosine kinase	hypothetical protein; K04733 interleukin-1 receptor-associated kinase 4 [EC:2.7.11.1]	PRGDB00160012	Glyma08g24610.1	Putative_R-Genes,_predicted_from_Pythozome	Glycine max	RLP	Leucine-rich repeat protein kinase family protein (best arabidopsis hit)	0	2
NP_001239903.1	scaffold4888	78236	80411	+	-	rhodanese-like domain-containing protein 4, chloroplastic; K17525 chitinase domain-containing protein 1	PRGDB00183046	GSVIVT01008201001	Putative_R-Genes,_predicted_from_Pythozome	Vitis vinifera	NL	calcium sensing receptor (best arabidopsis hit)	0	2
XP_007155185.1	scaffold4888	201596	209820	-	B3/4 domain;tRNA synthetase B5 domain	hypothetical protein; K01890 phenylalanyl-tRNA synthetase beta chain [EC:6.1.1.20]	PRGDB00201734	Bra006335	Putative_R-Genes,_predicted_from_Pythozome	Brassica rapa	RLP	--	1.47e-37	2
NP_173217.1-D154	scaffold4873	121849	125858	+	Leucine rich repeat N-terminal domain;Protein kinase domain	Leucine-rich receptor-like protein kinase family protein; K00924	PRGDB00188838	Gma.45856	Putative_R-Genes,_predicted_from_NCBI_UniGene	Glycine max	RLP	PREDICTED: Glycine max probable inactive leucine-rich repeat receptor-like protein kinase At1g66830-like (LOC100793996), mRNA	0	2
XP_002522030.1-D99	scaffold4873	177189	179873	-	Leucine rich repeat;Leucine rich repeat N-terminal domain;Protein tyrosine kinase	receptor-like protein kinase HSL1; K00924	PRGDB00188566	Gma.26054	Putative_R-Genes,_predicted_from_NCBI_UniGene	Glycine max	RLP	PREDICTED: Glycine max probably inactive leucine-rich repeat receptor-like protein kinase IMK2-like (LOC100799290), mRNA	0	2
XP_003541281.1	scaffold4796	178060	182655	+	ALG6, ALG8 glycosyltransferase family;PRA1 family protein	probable dolichyl pyrophosphate Man9GlcNAc2 alpha-1,3-glucosyltransferase-like; K03848 alpha-1,3-glucosyltransferase [EC:2.4.1.267]	PRGDB00184231	GSVIVT01032740001	Putative_R-Genes,_predicted_from_Pythozome	Vitis vinifera	RLP	inflorescence meristem receptor-like kinase 2 (best arabidopsis hit)	5.3e-75	2
XP_007147476.1-D5	scaffold4796	182017	192415	+	Leucine rich repeat;Leucine rich repeat N-terminal domain;PRA1 family protein;Protein tyrosine kinase	receptor-like protein kinase HSL1; K00924	PRGDB00189183	Gma.63730	Putative_R-Genes,_predicted_from_NCBI_UniGene	Glycine max	RLP	PREDICTED: Glycine max probably inactive leucine-rich repeat receptor-like protein kinase IMK2-like (LOC100811174), mRNA	0	2
XP_004505644.1-D17	scaffold4750	220632	231516	+	ABC-2 type transporter	hypothetical protein; K05681 ATP-binding cassette, subfamily G (WHITE), member 2	PRGDB00168265	Medtr4g104470.1	Putative_R-Genes,_predicted_from_Pythozome	Medicago truncatula	N	ABC-2 type transporter family protein (best arabidopsis hit)	4.5e-83	2
XP_002517501.1-D28	scaffold4750	239144	244471	-	Protein kinase domain	serine/threonine-protein kinase SAPK3-like; K14498 serine/threonine-protein kinase SRK2 [EC:2.7.11.1]	PRGDB00189827	Hv.34453	Putative_R-Genes,_predicted_from_NCBI_UniGene	Hordeum vulgare	NL	Hordeum vulgare subsp. vulgare mRNA for predicted protein, complete cds, clone: NIASHv2106K13	7.72e-46	2
XP_007149549.1	scaffold47	109919	113867	+	BES1/BZR1 plant transcription factor, N-terminal	BRASSINAZOLE-RESISTANT 1 protein, putative; K14503 brassinosteroid resistant 1/2	PRGDB00186771	--	Putative_R-Genes,_collected_from_NCBI_Protein	Vitis vinifera	CNL	PREDICTED: Vitis vinifera probable disease resistance protein At4g27220-like (LOC100243492), mRNA.	7.47e-29	2
XP_007143180.1-D6	scaffold47	194205	217033	+	Protein kinase domain;Salt stress response/antifungal	hypothetical protein; K04730 interleukin-1 receptor-associated kinase 1 [EC:2.7.11.1]	PRGDB00172785	ppa001541m	Putative_R-Genes,_predicted_from_Pythozome	Prunus persica	RLK-GNK2	cysteine-rich RLK (RECEPTOR-like protein kinase) 10 (best arabidopsis hit)	1.92e-74	2
XP_007136277.1-D2	scaffold4698	36164	38583	-	Mitochondrial ribosomal protein L27	hypothetical protein; K17422 large subunit ribosomal protein L41	PRGDB00192275	Mtr.10176	Putative_R-Genes,_predicted_from_NCBI_UniGene	Medicago truncatula	RLP	Medicago truncatula Receptor-like protein kinase (MTR_5g045910) mRNA, complete cds	2.91e-41	2
XP_004501681.1	scaffold4698	133547	134704	+	Ring finger domain	RING-H2 finger protein ATL11-like; K10664 E3 ubiquitin-protein ligase ATL6/9/15/31/42/55 [EC:2.3.2.27]	PRGDB00191694	Lsa.50102	Putative_R-Genes,_predicted_from_NCBI_UniGene	Lactuca sativa	N	TSA: Lactuca sativa Letassy_X1_3887 mRNA sequence	1.43e-27	2
XP_003531303.1-D2	scaffold4643	378058	381721	-	MORN repeat;Phosphatidylinositol-4-phosphate 5-Kinase	hypothetical protein; K00889 1-phosphatidylinositol-4-phosphate 5-kinase [EC:2.7.1.68]	PRGDB00215167	MDP0000184177	Putative_R-Genes,_predicted_from_Pythozome	Malus x domestica	TNL	--	1.5e-28	2
XP_002510817.1-D64	scaffold4643	631459	635678	-	Leucine rich repeat;Protein kinase domain	HSL1; receptor-like protein kinase HSL1; K00924	PRGDB00188995	Gma.59553	Putative_R-Genes,_predicted_from_NCBI_UniGene	Glycine max	RLP	PREDICTED: Glycine max receptor-like protein kinase HSL1-like (LOC100785822), mRNA	0	2
NP_172597.2-D128	scaffold4562	493428	495578	-	Protein kinase domain	hypothetical protein; K04733 interleukin-1 receptor-associated kinase 4 [EC:2.7.11.1]	PRGWK00000575	Solyc03g083470.1.1	Contributed_R-Genes	Solanum lycopersicum	RLK	--	4.45e-144	2
XP_007140047.1-D498	scaffold4562	595089	597827	+	Leucine Rich Repeat;Leucine rich repeat N-terminal domain	clustered mitochondria protein-like; K03255 protein TIF31	PRGDB00188720	Gma.38391	Putative_R-Genes,_predicted_from_NCBI_UniGene	Glycine max	RLP	PREDICTED: Glycine max probably inactive leucine-rich repeat receptor-like protein kinase At3g28040-like (LOC100795810), mRNA	4.59e-74	2
XP_014632352.1	scaffold4551	281111	286472	-	Protein tyrosine kinase;U-box domain	kinase family protein; K17609 nucleoredoxin [EC:1.8.1.8]	PRGDB00070332	Lja.15945	Putative_R-Genes,_predicted_from_NCBI_UniGene	Lotus japonicus	CN	Lotus japonicus cDNA, clone: LjFL3-020-AF01, HTC	0	2
XP_004499602.1	scaffold4551	372395	376118	+	DNA repair REX1-B	-	PRGDB00216630	MDP0000266107	Putative_R-Genes,_predicted_from_Pythozome	Malus x domestica	TNL	--	2.16e-83	2
NP_176789.1-D5	scaffold4448	238294	241222	-	Leucine rich repeat;Leucine rich repeat N-terminal domain;Protein tyrosine kinase	probable receptor protein kinase TMK1; K00924	PRGDB00168364	Medtr4g156280.1	Putative_R-Genes,_predicted_from_Pythozome	Medicago truncatula	RLP	transmembrane kinase 1 (best arabidopsis hit)	0	2
XP_004500281.1	scaffold4448	320029	330794	+	Clathrin, heavy-chain linker;Clathrin-H-link;Clathrin propeller repeat;Region in Clathrin and VPS	hypothetical protein; K04646 clathrin heavy chain	PRGDB00147219	Bradi4g25570.1	Putative_R-Genes,_predicted_from_Pythozome	Ricinus communis	CN	Clathrin, heavy chain (best arabidopsis hit); clathrin heavy chain, putative, expressed (best rice hit)	0	2
XP_008375855.1-D22	scaffold4185	62896	63744	-	Endonuclease/Exonuclease/phosphatase family	Protein transport protein Sec24-like protein; K14007 protein transport protein SEC24	PRGDB00186672	--	Putative_R-Genes,_collected_from_NCBI_Protein	Arachis hypogaea	NL	Arachis hypogaea clone AHF-205D04 NBS-LRR gene cluster, complete sequence.	7.52e-149	2
XP_002533914.1	scaffold4185	81460	101251	-	ABC-2 type transporter;ABC transporter;Double-stranded RNA binding motif	ATP-binding cassette, sub-family G, member 2; K05681 ATP-binding cassette, subfamily G (WHITE), member 2	PRGDB00158640	Glyma06g38400.1	Putative_R-Genes,_predicted_from_Pythozome	Glycine max	N	ABC-2 type transporter family protein (best arabidopsis hit)	0	2
XP_002514350.1-D4	scaffold4177	152921	167117	+	ABC-2 type transporter;ABC transporter;ABC-transporter extracellular N-terminal;Plant PDR ABC transporter associated	ATP-binding cassette, sub-family G, member 2; K05681 ATP-binding cassette, subfamily G (WHITE), member 2	PRGDB00158987	Glyma07g03780.1	Putative_R-Genes,_predicted_from_Pythozome	Glycine max	N	pleiotropic drug resistance 12 (best arabidopsis hit)	0	2
NP_181179.2-D23	scaffold4177	178987	195978	+	ABC-2 type transporter;ABC transporter;ABC-transporter extracellular N-terminal;Plant PDR ABC transporter associated	ATP-binding cassette, sub-family G, member 2; K05681 ATP-binding cassette, subfamily G (WHITE), member 2	PRGDB00158987	Glyma07g03780.1	Putative_R-Genes,_predicted_from_Pythozome	Glycine max	N	pleiotropic drug resistance 12 (best arabidopsis hit)	0	2
XP_004491527.1-D2	scaffold4091	142580	151937	+	ABC-2 type transporter;ABC transporter	ATP-binding cassette, sub-family G, member 2; K05681 ATP-binding cassette, subfamily G (WHITE), member 2	PRGDB00164807	Glyma18g08290.1	Putative_R-Genes,_predicted_from_Pythozome	Glycine max	N	ABC-2 type transporter family protein (best arabidopsis hit)	0	2
NP_193747.2-D19	scaffold4091	437424	441464	+	Leucine rich repeat;Leucine rich repeat N-terminal domain;Leucine-rich repeat signature;Protein kinase domain	Receptor-like protein kinase; K17422 large subunit ribosomal protein L41	PRGDB00188390	Gma.15630	Putative_R-Genes,_predicted_from_NCBI_UniGene	Glycine max	RLP	PREDICTED: Glycine max probable LRR receptor-like serine	0	2
NP_001237737.1	scaffold3935	6063	13021	-	Calcineurin-like phosphoesterase;Protein kinase domain	hypothetical protein; K08286 protein-serine/threonine kinase [EC:2.7.11.-]	PRGDB00215446	MDP0000264975	Putative_R-Genes,_predicted_from_Pythozome	Malus x domestica	TNL	--	6.11e-64	2
XP_007162876.1-D2	scaffold3935	10007	13021	-	Protein kinase domain	protein kinase G11A-like; K08286 protein-serine/threonine kinase [EC:2.7.11.-]	PRGDB00216033	MDP0000314577	Putative_R-Genes,_predicted_from_Pythozome	Malus x domestica	RLP	--	3.56e-66	2
XP_007151211.1-D2	scaffold383	61350	64542	-	Aldose 1-epimerase	hypothetical protein; K01785 aldose 1-epimerase [EC:5.1.3.3]	PRGDB00183143	GSVIVT01011370001	Putative_R-Genes,_predicted_from_Pythozome	Vitis vinifera	RLP	Leucine-rich repeat receptor-like protein kinase family protein (best arabidopsis hit)	1.95e-147	2
XP_007151211.1	scaffold383	79929	85437	-	Aldose 1-epimerase	hypothetical protein; K01785 aldose 1-epimerase [EC:5.1.3.3]	PRGDB00183143	GSVIVT01011370001	Putative_R-Genes,_predicted_from_Pythozome	Vitis vinifera	RLP	Leucine-rich repeat receptor-like protein kinase family protein (best arabidopsis hit)	3.02e-145	2
NP_001235367.1	scaffold3709	132819	134817	-	Rdx family	-	PRGDB00213588	MDP0000304482	Putative_R-Genes,_predicted_from_Pythozome	Malus x domestica	CNL	--	1.7e-46	2
XP_002522715.1-D64	scaffold3709	365382	369104	+	Glycosyl hydrolases family 18;Protein kinase domain	cysteine-rich receptor-like protein kinase 19; K01183 chitinase [EC:3.2.1.14]	PRGDB00144259	895321	Putative_R-Genes,_predicted_from_Pythozome	Arabidopsis lyrata	RLK-GNK2	cysteine-rich RLK (RECEPTOR-like protein kinase) 31 (best arabidopsis hit)	1.34e-91	2
XP_003540255.1	scaffold3483	352429	355073	+	Leucine rich repeat	protein phosphatase 1 regulatory subunit SDS22; K17550 protein phosphatase 1 regulatory subunit 7	PRGWK00002261	Sotub11g025490.1.1	Contributed_R-Genes	Solanum tuberosum	L	--	7.44e-114	2
XP_007143380.1-D53	scaffold3483	545484	593738	-	Leucine rich repeat;Leucine Rich Repeat;Leucine-rich repeat signature;Protein kinase domain	LRR receptor-like serine/threonine-protein kinase FLS2; K13420 LRR receptor-like serine/threonine-protein kinase FLS2 [EC:2.7.11.1]	PRGDB00173687	ppa001888m	Putative_R-Genes,_predicted_from_Pythozome	Prunus persica	RLP	Leucine-rich repeat protein kinase family protein (best arabidopsis hit)	2.05e-125	2
NP_197569.2-D211	scaffold3462	113949	123911	+	Protein tyrosine kinase;TMEM154 protein family	probable LRR receptor-like serine/threonine-protein kinase At4g31250; K04730 interleukin-1 receptor-associated kinase 1 [EC:2.7.11.1]	PRGDB00184389	GSVIVT01035571001	Putative_R-Genes,_predicted_from_Pythozome	Vitis vinifera	RLP	Leucine-rich repeat protein kinase family protein (best arabidopsis hit)	7.81e-48	2
XP_012572883.1-D572	scaffold3462	253424	254672	-	Reverse transcriptase (RNA-dependent DNA polymerase)	hypothetical protein; K06228 fused [EC:2.7.11.1]	PRGDB00217533	Thhalv10011182m	Putative_R-Genes,_predicted_from_Pythozome	Eutrema halophilum	CN	--	1.77e-61	2
XP_003535210.2	scaffold3267	179585	180654	-	Pathogenesis-related protein signature;Thaumatin family	nuclear pore complex protein Nup96 homolog; K14297 nuclear pore complex protein Nup98-Nup96	PRGDB00213092	MDP0000278380	Putative_R-Genes,_predicted_from_Pythozome	Malus x domestica	Other	--	6.8e-99	2
NP_193559.2-D90	scaffold3267	186554	212072	-	Pathogenesis-related protein signature;Thaumatin family	nuclear pore complex protein Nup96 homolog; K14297 nuclear pore complex protein Nup98-Nup96	PRGDB00213092	MDP0000278380	Putative_R-Genes,_predicted_from_Pythozome	Malus x domestica	Other	--	1.32e-85	2
XP_006607041.1-D5	scaffold3141	246281	246913	-	Reverse transcriptase (RNA-dependent DNA polymerase)	Myosin XI; K10357 myosin V	PRGDB00186672	--	Putative_R-Genes,_collected_from_NCBI_Protein	Arachis hypogaea	NL	Arachis hypogaea clone AHF-205D04 NBS-LRR gene cluster, complete sequence.	3.33e-82	2
XP_007158852.1-D126	scaffold3141	263432	275688	+	Leucine Rich Repeat;No apical meristem (NAM) protein;Protein kinase domain	receptor-like protein kinase HSL1; K00924	PRGDB00162195	Glyma12g33450.1	Putative_R-Genes,_predicted_from_Pythozome	Glycine max	RLP	HAESA-like 1 (best arabidopsis hit)	0	2
XP_004491181.1-D53	scaffold3134	18589	22076	+	Leucine rich repeat;Leucine rich repeat N-terminal domain;Protein kinase domain	probable LRR receptor-like serine/threonine-protein kinase At4g31250; K04730 interleukin-1 receptor-associated kinase 1 [EC:2.7.11.1]	PRGDB00158102	Glyma05g36470.1	Putative_R-Genes,_predicted_from_Pythozome	Glycine max	RLP	Leucine-rich repeat protein kinase family protein (best arabidopsis hit)	0	2
XP_008388895.1-D173	scaffold3134	41228	46187	+	Protein tyrosine kinase;Universal stress protein family	hypothetical protein; K17609 nucleoredoxin [EC:1.8.1.8]	PRGWK00000178	MELO3C011467	Contributed_R-Genes	Cucumis melo	RLK	--	0	2
XP_002520400.1-D2	scaffold29690	23096	26700	+	Calcineurin-like phosphoesterase;PPP5 TPR repeat region;Serine/threonine phosphatase family signature;Tetratricopeptide repeat;TPR repeat	PP5, LePP5; type 5 serine/threonine phosphatase 55 kDa isoform (EC:3.1.3.16); K04460 serine/threonine-protein phosphatase 5 [EC:3.1.3.16]	PRGDB00215267	MDP0000256952	Putative_R-Genes,_predicted_from_Pythozome	Malus x domestica	RLP	--	0	2
XP_007142243.1	scaffold29690	38763	45672	-	Di-glucose binding within endoplasmic reticulum;Leucine rich repeat;Protein kinase domain	hypothetical protein; K04733 interleukin-1 receptor-associated kinase 4 [EC:2.7.11.1]	PRGDB00196209	Phvulv091022555m	Putative_R-Genes,_predicted_from_Pythozome	Phaseolus vulgaris	RLP	--	0	2
XP_012567242.1	scaffold2960	27005	29753	-	Protein kinase domain	protein kinase G11A-like; K08286 protein-serine/threonine kinase [EC:2.7.11.-]	PRGDB00216033	MDP0000314577	Putative_R-Genes,_predicted_from_Pythozome	Malus x domestica	RLP	--	1.76e-74	2
XP_004514203.2	scaffold2960	62207	81145	+	Disease resistance protein signature;NB-ARC domain	disease resistance protein RPS2-like; K13459 disease resistance protein RPS2	PRGDB00164153	Glyma16g03500.1	Putative_R-Genes,_predicted_from_Pythozome	Glycine max	NL	NB-ARC domain-containing disease resistance protein (best arabidopsis hit)	0	2
XP_003536931.1	scaffold2878	114448	115813	+	Protein of unknown function DUF260	LOB domain-containing protein 29-like; K13945	PRGDB00213803	MDP0000322059	Putative_R-Genes,_predicted_from_Pythozome	Malus x domestica	RLP	--	9.18e-45	2
XP_004493763.1-D2	scaffold2878	211427	213084	-	Protein of unknown function DUF260	LOB domain-containing protein 16; K13944	PRGDB00213803	MDP0000322059	Putative_R-Genes,_predicted_from_Pythozome	Malus x domestica	RLP	--	7.02e-48	2
NP_001078576.1-D29	scaffold2769	77363	80547	-	Fructose-bisphosphate aldolase class-I;Protein kinase domain	calcium-dependent protein kinase 10-like; K13412 calcium-dependent protein kinase [EC:2.7.11.1]	PRGDB00196335	Phvulv091016128m	Putative_R-Genes,_predicted_from_Pythozome	Phaseolus vulgaris	RLP	--	1.44e-56	2
XP_008361628.1-D22	scaffold2769	77378	77704	-	Protein kinase domain	BRASSINOSTEROID INSENSITIVE 1-associated receptor kinase 1 precursor, putative (EC:2.7.10.1); K13418 somatic embryogenesis receptor kinase 1 [EC:2.7.10.1 2.7.11.1]	PRGDB00196335	Phvulv091016128m	Putative_R-Genes,_predicted_from_Pythozome	Phaseolus vulgaris	RLP	--	4.02e-57	2
XP_002529835.1	scaffold2764	102238	112562	-	Domain of unknown function (DUF1984);Phytochelatin synthase	glutathione gamma-glutamylcysteinyltransferase 1; K05941 glutathione gamma-glutamylcysteinyltransferase [EC:2.3.2.15]	PRGDB00214578	MDP0000311735	Putative_R-Genes,_predicted_from_Pythozome	Malus x domestica	CNL	--	5.4e-35	2
XP_003521301.1	scaffold2764	102238	112562	-	Domain of unknown function (DUF1984);Phytochelatin synthase	glutathione gamma-glutamylcysteinyltransferase 3-like; K05941 glutathione gamma-glutamylcysteinyltransferase [EC:2.3.2.15]	PRGDB00214578	MDP0000311735	Putative_R-Genes,_predicted_from_Pythozome	Malus x domestica	CNL	--	3.48e-35	2
XP_004516059.1-D8	scaffold2726	184761	186729	+	70kDa heat shock protein signature;Hsp70 protein	Heat shock protein; K03283 heat shock 70kDa protein 1/8; K06758 L1 cell adhesion molecule like protein	PRGDB00167710	Medtr2g047020.1	Putative_R-Genes,_predicted_from_Pythozome	Medicago truncatula	TNL	heat shock cognate protein 70-1 (best arabidopsis hit)	2.91e-170	2
XP_006585436.1-D50	scaffold2726	261980	267935	+	Leucine rich repeat;Leucine rich repeat N-terminal domain;Leucine-rich repeat signature;Protein kinase domain	receptor-like protein kinase HSL1; K00924	PRGDB00196661	Phvulv091012006m	Putative_R-Genes,_predicted_from_Pythozome	Phaseolus vulgaris	RLP	--	0	2
XP_006592426.1	scaffold2693	137538	155913	-	alpha/beta hydrolase fold;Epoxide hydrolase signature;Ulp1 protease family, C-terminal catalytic domain	hypothetical protein; K08726 soluble epoxide hydrolase / lipid-phosphate phosphatase [EC:3.3.2.10 3.1.3.76]	PRGDB00213322	MDP0000279719	Putative_R-Genes,_predicted_from_Pythozome	Malus x domestica	NL	--	1.22e-125	2
XP_002521508.1-D11	scaffold2693	152594	154770	-	alpha/beta hydrolase fold;Epoxide hydrolase signature	hypothetical protein; K08726 soluble epoxide hydrolase / lipid-phosphate phosphatase [EC:3.3.2.10 3.1.3.76]	PRGDB00213322	MDP0000279719	Putative_R-Genes,_predicted_from_Pythozome	Malus x domestica	NL	--	2.33e-136	2
NP_196564.1-D2	scaffold26305	172016	175667	-	Leucine rich repeat N-terminal domain;Protein tyrosine kinase	probable inactive receptor kinase At5g10020; K04730 interleukin-1 receptor-associated kinase 1 [EC:2.7.11.1]	PRGDB00156307	Glyma02g44210.1	Putative_R-Genes,_predicted_from_Pythozome	Glycine max	RLP	Leucine-rich repeat protein kinase family protein (best arabidopsis hit)	0	2
XP_004491185.1	scaffold26305	232262	234650	-	Leucine Rich Repeat;Leucine rich repeat N-terminal domain	serk2; somatic embryogenesis receptor-like kinase2; K13418 somatic embryogenesis receptor kinase 1 [EC:2.7.10.1 2.7.11.1]	PRGDB00068414	Ghi.6257	Putative_R-Genes,_predicted_from_NCBI_UniGene	Gossypium hirsutum	RLP	UFL_226_84 Cotton fiber 0-10 day post anthesis Gossypium hirsutum cDNA, mRNA sequence	4.05e-116	2
XP_002522003.1-D112	scaffold2585	71430	73712	-	Leucine Rich Repeat;Leucine-rich repeat signature;Protein tyrosine kinase	receptor-like protein kinase HSL1; K00924	PRGDB00068833	Gma.8444	Putative_R-Genes,_predicted_from_NCBI_UniGene	Glycine max	RLP	Glycine max receptor-like kinase RHG1 mRNA, complete cds	0	2
XP_002522003.1-D111	scaffold2585	75467	78172	+	Leucine Rich Repeat;Leucine rich repeat N-terminal domain;Leucine-rich repeat signature;Protein tyrosine kinase	Kinase family protein with leucine-rich repeat domain, putative; K00924	PRGDB00068833	Gma.8444	Putative_R-Genes,_predicted_from_NCBI_UniGene	Glycine max	RLP	Glycine max receptor-like kinase RHG1 mRNA, complete cds	0	2
XP_014621573.1-D50	scaffold2541	65078	65434	-	Hsp70 protein	heat shock cognate 70 kDa protein 2-like; K03283 heat shock 70kDa protein 1/8; K06758 L1 cell adhesion molecule like protein	PRGDB00167710	Medtr2g047020.1	Putative_R-Genes,_predicted_from_Pythozome	Medicago truncatula	TNL	heat shock cognate protein 70-1 (best arabidopsis hit)	7.43e-49	2
XP_007134387.1	scaffold2541	158222	160681	-	Protein kinase domain;Protein tyrosine kinase	hypothetical protein; K04730 interleukin-1 receptor-associated kinase 1 [EC:2.7.11.1]	PRGDB00064709	Aan.6255	Putative_R-Genes,_predicted_from_NCBI_UniGene	Artemisia annua	RLK	CATC4601.fwd CATC Artemisia annua, Tanzanian, from Sandeman Seeds, 0.5-1kb Artemisia annua cDNA clone CATC4601 5', mRNA sequence	4.03e-86	2
XP_007144924.1-D2	scaffold25068	1680	2563	+	Protein of unknown function DUF260	uncharacterized LOC100527324; K13945	PRGDB00213803	MDP0000322059	Putative_R-Genes,_predicted_from_Pythozome	Malus x domestica	RLP	--	8.03e-44	2
XP_007162525.1	scaffold25068	11739	13075	-	Protein of unknown function DUF260	LOB domain-containing protein 16; K13944	PRGDB00213803	MDP0000322059	Putative_R-Genes,_predicted_from_Pythozome	Malus x domestica	RLP	--	4.66e-48	2
XP_002518453.1	scaffold2483	52241	53473	+	Petal formation-expressed	-	PRGDB00206435	Lus10015549	Putative_R-Genes,_predicted_from_Pythozome	Linum usitatissimum	RLP	--	5.47e-38	2
XP_003534707.1-D3	scaffold2483	58674	59915	+	Petal formation-expressed	-	PRGDB00206435	Lus10015549	Putative_R-Genes,_predicted_from_Pythozome	Linum usitatissimum	RLP	--	1.54e-37	2
XP_008390491.1-D2	scaffold2468	17268	57084	+	ABC-2 type transporter;ABC transporter;ABC-transporter extracellular N-terminal;Plant PDR ABC transporter associated	ppabcg30; ATP-binding cassette transporter, subfamily G, member 30, group WBC protein PpABCG30; K05681 ATP-binding cassette, subfamily G (WHITE), member 2	PRGDB00188895	Gma.51771	Putative_R-Genes,_predicted_from_NCBI_UniGene	Glycine max	N	PREDICTED: Glycine max pleiotropic drug resistance protein 3-like (LOC100783980), mRNA	0	2
XP_008390491.1	scaffold2468	204265	214540	+	ABC-2 type transporter;ABC transporter;ABC-transporter extracellular N-terminal;Plant PDR ABC transporter associated	ppabcg30; ATP-binding cassette transporter, subfamily G, member 30, group WBC protein PpABCG30; K05681 ATP-binding cassette, subfamily G (WHITE), member 2	PRGDB00188895	Gma.51771	Putative_R-Genes,_predicted_from_NCBI_UniGene	Glycine max	N	PREDICTED: Glycine max pleiotropic drug resistance protein 3-like (LOC100783980), mRNA	0	2
XP_004486025.1	scaffold24284	11654	28492	+	Protein of unknown function (DUF640);Reverse transcriptase (RNA-dependent DNA polymerase);Type II intron maturase	-	PRGDB00155469	orange1.1g000354m	Putative_R-Genes,_predicted_from_Pythozome	Citrus sinensis	CNL	NB-ARC domain-containing disease resistance protein (best arabidopsis hit)	2.8e-43	2
XP_003552937.1-D3	scaffold24284	11687	12391	+	Protein of unknown function (DUF640)	-	PRGDB00179296	Sb05g008160.1	Putative_R-Genes,_predicted_from_Pythozome	Sorghum bicolor	NL	MAP kinase kinase 5 (best arabidopsis hit); resistance protein, putative, expressed (best rice hit)	8.28e-73	2
XP_006604928.1	scaffold2376	14569	20398	+	Protein kinase domain	hypothetical protein; K04730 interleukin-1 receptor-associated kinase 1 [EC:2.7.11.1]	PRGDB00188966	Gma.58805	Putative_R-Genes,_predicted_from_NCBI_UniGene	Glycine max	RLP	PREDICTED: Glycine max protein STRUBBELIG-RECEPTOR FAMILY 6-like (LOC100807707), mRNA	0	2
XP_007144218.1-D23	scaffold2376	118270	121441	+	Leucine rich repeat;Leucine rich repeat N-terminal domain;Protein kinase domain	receptor protein kinase CLAVATA1; K00924	PRGDB00156826	Glyma03g32460.1	Putative_R-Genes,_predicted_from_Pythozome	Glycine max	RLP	Leucine-rich repeat transmembrane protein kinase family protein (best arabidopsis hit)	0	2
XP_007154870.1-D5	scaffold2350	127493	129427	-	70kDa heat shock protein signature;Hsp70 protein	hypothetical protein; K03283 heat shock 70kDa protein 1/8; K06758 L1 cell adhesion molecule like protein	PRGDB00167710	Medtr2g047020.1	Putative_R-Genes,_predicted_from_Pythozome	Medicago truncatula	TNL	heat shock cognate protein 70-1 (best arabidopsis hit)	0	2
NP_177694.1-D9	scaffold2350	183218	186469	+	Leucine rich repeat;Leucine rich repeat N-terminal domain;Leucine-rich repeat signature;Protein kinase domain	Receptor-like protein kinase; K17422 large subunit ribosomal protein L41	PRGDB00196002	Phvulv091012859m	Putative_R-Genes,_predicted_from_Pythozome	Phaseolus vulgaris	RLP	--	0	2
NP_001235355.1-D3	scaffold22634	22489	23121	-	PsaD	photosystem I reaction center subunit II, chloroplastic-like; K02692 photosystem I subunit II	PRGDB00192813	Smo.15449	Putative_R-Genes,_predicted_from_NCBI_UniGene	Selaginella moellendorffii	N	Selaginella moellendorffii hypothetical protein, mRNA	1.05e-80	2
XP_007138788.1-D2	scaffold22634	39588	44855	-	Disease resistance protein signature;NB-ARC domain;TIR domain	hypothetical protein; K19613 leucine-rich repeat protein SHOC2	PRGDB00188922	Gma.53510	Putative_R-Genes,_predicted_from_NCBI_UniGene	Glycine max	TNL	PREDICTED: Glycine max protein SUPPRESSOR OF npr1-1, CONSTITUTIVE 1-like (LOC100802823), mRNA	0	2
XP_008365627.1-D116	scaffold2256	235817	236200	+	-	uncharacterized LOC104905624; K05658 ATP-binding cassette, subfamily B (MDR/TAP), member 1 [EC:3.6.3.44]	PRGDB00178373	POPTR_0672s00200.1	Putative_R-Genes,_predicted_from_Pythozome	Populus trichocarpa	RLP	Leucine-rich repeat protein kinase family protein (best arabidopsis hit)	2.4e-38	2
XP_006596428.1	scaffold2256	252223	255027	+	Rdx family	-	PRGDB00213588	MDP0000304482	Putative_R-Genes,_predicted_from_Pythozome	Malus x domestica	CNL	--	2.06e-48	2
XP_004486780.1-D25	scaffold2210	114844	117723	+	ABC-2 type transporter;ABC transporter	hypothetical protein; K05681 ATP-binding cassette, subfamily G (WHITE), member 2	PRGDB00159658	Glyma08g07530.1	Putative_R-Genes,_predicted_from_Pythozome	Glycine max	N	white-brown complex homolog protein 11 (best arabidopsis hit)	0	2
XP_014621691.1	scaffold2210	133247	155337	-	ABC-2 type transporter;ABC transporter	hypothetical protein; K05681 ATP-binding cassette, subfamily G (WHITE), member 2	PRGDB00183364	GSVIVT01015768001	Putative_R-Genes,_predicted_from_Pythozome	Vitis vinifera	N	white-brown complex homolog protein 11 (best arabidopsis hit)	0	2
XP_004515994.1-D2	scaffold21	287089	327027	+	Aldehyde dehydrogenase family;Mlo family	MLO-like protein 12-like; K08472 mlo protein	PRGDB00164293	Glyma16g26090.1	Putative_R-Genes,_predicted_from_Pythozome	Glycine max	Mlo-like	Seven transmembrane MLO family protein (best arabidopsis hit)	0	2
XP_007155616.1-D19	scaffold21	320258	327402	+	Aldehyde dehydrogenase family;Mlo family	MLO-like protein 12-like; K08472 mlo protein	PRGDB00164293	Glyma16g26090.1	Putative_R-Genes,_predicted_from_Pythozome	Glycine max	Mlo-like	Seven transmembrane MLO family protein (best arabidopsis hit)	1.76e-90	2
XP_006603025.1-D3	scaffold19699	116567	128810	+	Ribosomal protein L23;Ribosomal protein L23, N-terminal domain	hypothetical protein; K02893 large subunit ribosomal protein L23Ae	PRGDB00186222	GRMZM2G060054_T03	Putative_R-Genes,_predicted_from_Pythozome	Zea mays	CNL	ribosomal protein L23AB (best arabidopsis hit); expressed protein (best rice hit)	8.36e-49	2
XP_008385160.1-D4	scaffold19699	217052	219161	-	Ras family;Transforming protein P21 ras signature	hypothetical protein; K07901 Ras-related protein Rab-8A	PRGDB00202169	Bra007015	Putative_R-Genes,_predicted_from_Pythozome	Brassica rapa	RLP	--	4.63e-126	2
XP_007150219.1	scaffold1905	421979	427124	+	Mlo family	hypothetical protein; K08472 mlo protein	PRGDB00195113	Phvulv091024194m	Putative_R-Genes,_predicted_from_Pythozome	Phaseolus vulgaris	Mlo-like	--	0	2
XP_007150218.1	scaffold1905	429166	429492	+	Sec61beta family	hypothetical protein; K09481 protein transport protein SEC61 subunit beta	PRGDB00183798	GSVIVT01025162001	Putative_R-Genes,_predicted_from_Pythozome	Vitis vinifera	Mlo-like	Seven transmembrane MLO family protein (best arabidopsis hit)	1.25e-39	2
XP_008347334.1-D3	scaffold1883	47040	72924	-	ABC-2 type transporter;ABC transporter;Domain of unknown function (DUF4283);RNA recognition motif. (a.k.a. RRM, RBD, or RNP domain)	ATP-binding cassette, sub-family G, member 2; K05681 ATP-binding cassette, subfamily G (WHITE), member 2	PRGDB00195901	Phvulv091025367m	Putative_R-Genes,_predicted_from_Pythozome	Phaseolus vulgaris	N	--	0	2
XP_004490285.1-D2	scaffold1883	148275	154419	-	Phosphoenolpyruvate carboxylase;Phosphoenolpyruvate carboxylase signature	PEPC17; phosphoenolpyruvate carboxylase (EC:4.1.1.31); K01595 phosphoenolpyruvate carboxylase [EC:4.1.1.31]	PRGDB00167562	Medtr1g118320.1	Putative_R-Genes,_predicted_from_Pythozome	Medicago truncatula	CN	phosphoenolpyruvate carboxylase 4 (best arabidopsis hit)	0	2
XP_007145255.1	scaffold18591	96260	106766	-	Ethylene-responsive protein kinase Le-CTR1;Heat shock factor (HSF) domain signature;HSF-type DNA-binding;Protein tyrosine kinase	serine/threonine-protein kinase CTR1; K14510 serine/threonine-protein kinase CTR1 [EC:2.7.11.1]	PRGDB00206219	Lus10043428	Putative_R-Genes,_predicted_from_Pythozome	Linum usitatissimum	N	--	4.69e-57	2
XP_014618508.1	scaffold18591	100928	106766	-	Ethylene-responsive protein kinase Le-CTR1;Protein tyrosine kinase;Tyrosine kinase catalytic domain signature	serine/threonine-protein kinase CTR1-like; K14510 serine/threonine-protein kinase CTR1 [EC:2.7.11.1]	PRGDB00206219	Lus10043428	Putative_R-Genes,_predicted_from_Pythozome	Linum usitatissimum	N	--	4.99e-136	2
XP_014617136.1-D59	scaffold1848	3707	4820	+	Reverse transcriptase (RNA-dependent DNA polymerase)	uncharacterized LOC100245431; K05387 glutamate receptor, ionotropic, plant	PRGDB00206816	LOC_Os10g21950.1	Putative_R-Genes,_predicted_from_Pythozome	Oryza sativa	NL	--	5.69e-66	2
XP_012570419.1-D45	scaffold1848	4677	5183	+	-	uncharacterized LOC100245431; K05387 glutamate receptor, ionotropic, plant	PRGDB00188818	Gma.45040	Putative_R-Genes,_predicted_from_NCBI_UniGene	Glycine max	NL	PREDICTED: Glycine max putative disease resistance protein At4g11170-like (LOC100803552), mRNA	3.87e-29	2
XP_007145541.1-D2	scaffold1823	12389	19764	+	ABC-2 type transporter;ABC transporter;ABC-transporter extracellular N-terminal;Plant PDR ABC transporter associated	hypothetical protein; K05681 ATP-binding cassette, subfamily G (WHITE), member 2	PRGDB00165231	Glyma19g37760.1	Putative_R-Genes,_predicted_from_Pythozome	Glycine max	N	pleiotropic drug resistance 11 (best arabidopsis hit)	0	2
XP_003554420.1	scaffold1823	45775	62874	+	Alpha amylase, catalytic domain;Alpha amylase, C-terminal all-beta domain;Carbohydrate-binding module 48 (Isoamylase N-terminal domain)	hypothetical protein; K00700 1,4-alpha-glucan branching enzyme [EC:2.4.1.18]	PRGDB00202237	Bra017241	Putative_R-Genes,_predicted_from_Pythozome	Brassica rapa	N	--	0	2
XP_007159317.1-D2	scaffold1799	55034	112530	-	Transcription factor Tfb2	general transcription factor IIH subunit 4; K03144 transcription initiation factor TFIIH subunit 4	PRGDB00062428	tir-nbs resistance protein	Putative_R-Genes,_collected_from_NCBI_Protein	Populus trichocarpa	N	Populus trichocarpa linkage group III, whole genome shotgun sequence.	0	2
XP_007160083.1	scaffold1799	67465	70410	-	-	-	PRGDB00062428	tir-nbs resistance protein	Putative_R-Genes,_collected_from_NCBI_Protein	Populus trichocarpa	N	Populus trichocarpa linkage group III, whole genome shotgun sequence.	0	2
XP_008354068.1-D55	scaffold1778	42246	44979	+	Endonuclease/Exonuclease/phosphatase family;Reverse transcriptase (RNA-dependent DNA polymerase)	60S ribosomal export protein NMD3; K07562 nonsense-mediated mRNA decay protein 3	PRGDB00186672	--	Putative_R-Genes,_collected_from_NCBI_Protein	Arachis hypogaea	NL	Arachis hypogaea clone AHF-205D04 NBS-LRR gene cluster, complete sequence.	0	2
XP_014621270.1-D2	scaffold1778	266159	268024	-	Protein kinase domain	hypothetical protein; K13418 somatic embryogenesis receptor kinase 1 [EC:2.7.10.1 2.7.11.1]	PRGDB00189026	Gma.60608	Putative_R-Genes,_predicted_from_NCBI_UniGene	Glycine max	RLP	PREDICTED: Glycine max probable LRR receptor-like serine	0	2
XP_004507479.1	scaffold1772	116662	117857	-	NAC domain	transcription factor BTF3 homolog 4-like; K01527 nascent polypeptide-associated complex subunit beta	PRGDB00167870	Medtr3g021430.1	Putative_R-Genes,_predicted_from_Pythozome	Medicago truncatula	CNL	Disease resistance protein (TIR-NBS-LRR class) family (best arabidopsis hit)	1.46e-69	2
XP_004507479.1-D2	scaffold1772	119033	120470	+	NAC domain	transcription factor BTF3 homolog 4-like; K01527 nascent polypeptide-associated complex subunit beta	PRGDB00167870	Medtr3g021430.1	Putative_R-Genes,_predicted_from_Pythozome	Medicago truncatula	CNL	Disease resistance protein (TIR-NBS-LRR class) family (best arabidopsis hit)	1.57e-69	2
XP_008370575.1-D7	scaffold177	252619	254814	-	Protein of unknown function (DUF616)	POPTRDRAFT_756677; hypothetical protein; K04730 interleukin-1 receptor-associated kinase 1 [EC:2.7.11.1]	PRGWK00000140	MELO3C009089	Contributed_R-Genes	Cucumis melo	RLK	--	1.29e-84	2
XP_007160799.1-D5	scaffold177	252861	254814	-	Protein of unknown function (DUF616)	POPTRDRAFT_756677; hypothetical protein; K04730 interleukin-1 receptor-associated kinase 1 [EC:2.7.11.1]	PRGWK00000140	MELO3C009089	Contributed_R-Genes	Cucumis melo	RLK	--	4.75e-63	2
XP_014632591.1	scaffold17499	99579	119089	+	Disease resistance protein signature;NB-ARC domain	disease resistance protein RPM1-like; K13457 disease resistance protein RPM1	PRGDB00061652	NBS-LRR type disease resistance protein	Putative_R-Genes,_collected_from_NCBI_Protein	Glycine max	NL	Glycine max clone cw25 NBS-LRR type disease resistance protein mRNA, complete cds.	0	2
XP_007158209.1-D3	scaffold17499	121393	124784	+	Disease resistance protein signature;Leucine rich repeat;NB-ARC domain	disease resistance protein RPM1-like; K13457 disease resistance protein RPM1	PRGDB00188929	Gma.54361	Putative_R-Genes,_predicted_from_NCBI_UniGene	Glycine max	CNL	PREDICTED: Glycine max disease resistance protein RPM1-like (LOC100805346), mRNA	0	2
XP_006601749.1	scaffold17024	34114	38730	+	Serine hydroxymethyltransferase	serine hydroxymethyltransferase 5; K00600 glycine hydroxymethyltransferase [EC:2.1.2.1]	PRGDB00214085	MDP0000194411	Putative_R-Genes,_predicted_from_Pythozome	Malus x domestica	N	--	3.73e-60	2
XP_004512550.1-D2	scaffold17024	64811	71046	-	Carbohydrate-binding protein of the ER;Leucine rich repeat N-terminal domain;Protein tyrosine kinase	nodulation receptor kinase-like; K04730 interleukin-1 receptor-associated kinase 1 [EC:2.7.11.1]	PRGDB00070373	Lja.17570	Putative_R-Genes,_predicted_from_NCBI_UniGene	Lotus japonicus	RLP	Lotus japonicus receptor-like kinase SYMRK mRNA, complete cds	0	2
XP_002526877.1-D192	scaffold16800	81348	82489	-	Protein kinase domain	probable LRR receptor-like serine/threonine-protein kinase At3g47570; K04730 interleukin-1 receptor-associated kinase 1 [EC:2.7.11.1]	PRGDB00155626	Glyma01g35560.1	Putative_R-Genes,_predicted_from_Pythozome	Glycine max	RLP	Leucine-rich repeat protein kinase family protein (best arabidopsis hit)	8.9e-46	2
XP_007157942.1-D36	scaffold16800	94851	98902	+	Leucine rich repeat;Leucine rich repeat N-terminal domain;Protein tyrosine kinase	LRR receptor-like serine/threonine-protein kinase EFR; K13428 LRR receptor-like serine/threonine-protein kinase EFR [EC:2.7.11.1]	PRGDB00196361	Phvulv091004404m	Putative_R-Genes,_predicted_from_Pythozome	Phaseolus vulgaris	RLP	--	0	2
XP_006575644.2-D6	scaffold16498	28744	97260	+	Disease resistance protein signature;NB-ARC domain;TIR domain	Heat shock protein; K03283 heat shock 70kDa protein 1/8; K06758 L1 cell adhesion molecule like protein	PRGDB00186478	--	Putative_R-Genes,_collected_from_NCBI_Protein	Medicago truncatula	TNL	Medicago truncatula Disease resistance protein (MTR_6g071550) mRNA, complete cds.	1.07e-36	2
XP_012570563.1-D11	scaffold16498	55515	57132	-	Reverse transcriptase (RNA-dependent DNA polymerase)	uncharacterized LOC104905624; K05658 ATP-binding cassette, subfamily B (MDR/TAP), member 1 [EC:3.6.3.44]	PRGDB00047409	TIR-NBS-LRR-TIR type disease resistance protein	Putative_R-Genes,_collected_from_NCBI_Protein	Populus trichocarpa	TNL	Populus trichocarpa clone 110301 TIR-NBS-LRR-TIR type disease resistance protein mRNA, partial cds.	7.05e-48	2
XP_002509914.1	scaffold1645	81795	83966	-	Aldose 1-epimerase	putative glucose-6-phosphate 1-epimerase; K01792 glucose-6-phosphate 1-epimerase [EC:5.1.3.15]	PRGDB00201591	Bra013728	Putative_R-Genes,_predicted_from_Pythozome	Brassica rapa	RLP	--	7.63e-148	2
XP_014620127.1-D575	scaffold1645	100684	101025	+	-	uncharacterized LOC104905624; K05658 ATP-binding cassette, subfamily B (MDR/TAP), member 1 [EC:3.6.3.44]	PRGDB00178373	POPTR_0672s00200.1	Putative_R-Genes,_predicted_from_Pythozome	Populus trichocarpa	RLP	Leucine-rich repeat protein kinase family protein (best arabidopsis hit)	4.62e-33	2
XP_007158068.1	scaffold16409	2187	13527	+	ABC-2 type transporter;ABC transporter;N-terminal domain of CBF1 interacting co-repressor CIR	hypothetical protein; K06066 CBF1 interacting corepressor	PRGDB00217654	Thhalv10007027m	Putative_R-Genes,_predicted_from_Pythozome	Eutrema halophilum	N	--	0	2
XP_003537708.1-D2	scaffold16409	2187	4942	+	ABC-2 type transporter;ABC transporter	ATP-binding cassette, sub-family G, member 2; K05681 ATP-binding cassette, subfamily G (WHITE), member 2	PRGDB00188741	Gma.39202	Putative_R-Genes,_predicted_from_NCBI_UniGene	Glycine max	CN	PREDICTED: Glycine max ABC transporter G family member 14-like (LOC100794774), mRNA	0	2
XP_008354068.1-D14	scaffold16286	15597	18413	+	Reverse transcriptase (RNA-dependent DNA polymerase)	60S ribosomal export protein NMD3; K07562 nonsense-mediated mRNA decay protein 3	PRGDB00186672	--	Putative_R-Genes,_collected_from_NCBI_Protein	Arachis hypogaea	NL	Arachis hypogaea clone AHF-205D04 NBS-LRR gene cluster, complete sequence.	0	2
XP_006589413.1	scaffold16286	40287	45341	+	ABC transporter	ATP-binding cassette, sub-family G, member 2; K05681 ATP-binding cassette, subfamily G (WHITE), member 2	PRGDB00188259	Gma.4748	Putative_R-Genes,_predicted_from_NCBI_UniGene	Glycine max	N	PREDICTED: Glycine max ABC transporter G family member 24-like (LOC100775464), mRNA	0	2
XP_003532450.2	scaffold16178	4514	31206	-	Leucine rich repeat;Leucine rich repeat N-terminal domain;Protein tyrosine kinase;tRNA pseudouridine synthase	probable LRR receptor-like serine/threonine-protein kinase RLK; K04730 interleukin-1 receptor-associated kinase 1 [EC:2.7.11.1]	PRGDB00158102	Glyma05g36470.1	Putative_R-Genes,_predicted_from_Pythozome	Glycine max	RLP	Leucine-rich repeat protein kinase family protein (best arabidopsis hit)	3.09e-139	2
XP_002526683.1-D78	scaffold16178	4514	11501	-	Leucine rich repeat;Leucine rich repeat N-terminal domain;Protein tyrosine kinase;tRNA pseudouridine synthase	probable LRR receptor-like serine/threonine-protein kinase At4g31250; K04730 interleukin-1 receptor-associated kinase 1 [EC:2.7.11.1]	PRGDB00158102	Glyma05g36470.1	Putative_R-Genes,_predicted_from_Pythozome	Glycine max	RLP	Leucine-rich repeat protein kinase family protein (best arabidopsis hit)	0	2
XP_008384273.1-D9	scaffold1592	343300	345251	-	70kDa heat shock protein signature;Hsp70 protein	probable mediator of RNA polymerase II transcription subunit 37c-like; K03283 heat shock 70kDa protein 1/8; K06758 L1 cell adhesion molecule like protein	PRGDB00167710	Medtr2g047020.1	Putative_R-Genes,_predicted_from_Pythozome	Medicago truncatula	TNL	heat shock cognate protein 70-1 (best arabidopsis hit)	0	2
XP_008384273.1-D17	scaffold1592	358038	360628	-	70kDa heat shock protein signature;Hsp70 protein	probable mediator of RNA polymerase II transcription subunit 37c-like; K03283 heat shock 70kDa protein 1/8; K06758 L1 cell adhesion molecule like protein	PRGDB00167710	Medtr2g047020.1	Putative_R-Genes,_predicted_from_Pythozome	Medicago truncatula	TNL	heat shock cognate protein 70-1 (best arabidopsis hit)	3.4e-125	2
XP_004503376.1	scaffold15103	122840	132049	+	Calmodulin binding protein-like;Protein kinase domain;Wall-associated receptor kinase C-terminal	probable receptor-like protein kinase At1g67000-like; K04730 interleukin-1 receptor-associated kinase 1 [EC:2.7.11.1]	PRGDB00165401	Glyma20g25240.1	Putative_R-Genes,_predicted_from_Pythozome	Glycine max	RLP	Protein kinase superfamily protein (best arabidopsis hit)	1.05e-130	2
NP_001238159.1-D47	scaffold15103	122840	132049	+	Calmodulin binding protein-like;Protein kinase domain;Wall-associated receptor kinase C-terminal	probable receptor-like protein kinase At1g67000-like; K04730 interleukin-1 receptor-associated kinase 1 [EC:2.7.11.1]	PRGDB00165401	Glyma20g25240.1	Putative_R-Genes,_predicted_from_Pythozome	Glycine max	RLP	Protein kinase superfamily protein (best arabidopsis hit)	5.26e-131	2
XP_012568418.1-D2	scaffold149	88002	95304	-	-	-	PRGDB00215932	MDP0000247856	Putative_R-Genes,_predicted_from_Pythozome	Malus x domestica	TNL	--	0	2
XP_003545895.1	scaffold149	105392	131005	-	Clathrin light chain	-	PRGDB00217007	MDP0000579910	Putative_R-Genes,_predicted_from_Pythozome	Malus x domestica	RLP	--	9.02e-69	2
XP_002528881.1-D59	scaffold14439	119933	129470	-	Leucine rich repeat;Leucine Rich Repeat;Protein kinase domain	probable receptor-like protein kinase At1g67000; K04730 interleukin-1 receptor-associated kinase 1 [EC:2.7.11.1]	PRGDB00067837	Can.26084	Putative_R-Genes,_predicted_from_NCBI_UniGene	Capsicum annuum	RLK	Capsicum annuum receptor-like protein kinase mRNA, complete cds	2.11e-126	2
XP_008371728.1-D17	scaffold14439	124015	154211	-	Leucine rich repeat N-terminal domain;Protein kinase domain	PR5-like receptor kinase, putative; K04733 interleukin-1 receptor-associated kinase 4 [EC:2.7.11.1]	PRGDB00169616	Medtr7g093320.1	Putative_R-Genes,_predicted_from_Pythozome	Medicago truncatula	RLP	Leucine-rich repeat protein kinase family protein (best arabidopsis hit)	5.02e-153	2
XP_012568090.1-D33	scaffold1440	137313	258868	+	Disease resistance protein signature;Leucine Rich Repeat;NB-ARC domain;TIR domain	hypothetical protein; K19613 leucine-rich repeat protein SHOC2	PRGDB00169876	Medtr8g034140.1	Putative_R-Genes,_predicted_from_Pythozome	Medicago truncatula	TNL	disease resistance protein (TIR-NBS-LRR class), putative (best arabidopsis hit)	0	2
XP_002513539.1-D84	scaffold1440	238774	255143	+	Disease resistance protein signature;Leucine Rich Repeat;NB-ARC domain;TIR domain	hypothetical protein; K19613 leucine-rich repeat protein SHOC2	PRGDB00169876	Medtr8g034140.1	Putative_R-Genes,_predicted_from_Pythozome	Medicago truncatula	TNL	disease resistance protein (TIR-NBS-LRR class), putative (best arabidopsis hit)	0	2
XP_004486443.1-D2	scaffold1389	73836	82938	+	Glycosyl hydrolases family 28;Root hair defective 3 GTP-binding protein (RHD3)	hypothetical protein; K01184 polygalacturonase [EC:3.2.1.15]	PRGDB00203535	Carubv10019685m	Putative_R-Genes,_predicted_from_Pythozome	Capsella rubella	CN	--	0	2
XP_004505337.1	scaffold1389	174473	177631	+	Protein of unknown function DUF260	uncharacterized LOC102704525; K01227 mannosyl-glycoprotein endo-beta-N-acetylglucosaminidase [EC:3.2.1.96]	PRGWK00002314	Sotub11g029390.1.1	Contributed_R-Genes	Solanum tuberosum	CNL	--	9.63e-44	2
XP_004486782.1	scaffold13816	25324	53933	-	ABC-2 type transporter;ABC transporter;Malic enzyme, NAD binding domain;Malic enzyme, N-terminal domain;Malic enzyme signature;Myb-like DNA-binding domain;Plant PDR ABC transporter associated	NADP-dependent malic enzyme-like; K00029 malate dehydrogenase (oxaloacetate-decarboxylating)(NADP+) [EC:1.1.1.40]	PRGDB00187665	Gma.59420	Putative_R-Genes,_predicted_from_NCBI_UniGene	Glycine max	N	Glycine max cDNA, clone: GMFL01-24-L17	0	2
XP_014621614.1	scaffold13816	56098	67105	-	ABC-2 type transporter;ABC transporter;ABC-transporter extracellular N-terminal;Plant PDR ABC transporter associated	hypothetical protein; K05681 ATP-binding cassette, subfamily G (WHITE), member 2	PRGDB00158924	Glyma07g01860.1	Putative_R-Genes,_predicted_from_Pythozome	Glycine max	N	ABC-2 and Plant PDR ABC-type transporter family protein (best arabidopsis hit)	0	2
XP_007158820.1-D21	scaffold13752	51922	55268	-	Leucine rich repeat;Leucine rich repeat N-terminal domain;Leucine-rich repeat signature;Protein kinase domain	Receptor-like protein kinase; K17422 large subunit ribosomal protein L41	PRGDB00189096	Gma.62020	Putative_R-Genes,_predicted_from_NCBI_UniGene	Glycine max	RLP	PREDICTED: Glycine max probable LRR receptor-like serine	0	2
XP_004491527.1	scaffold13752	97210	100430	-	ABC-2 type transporter;ABC transporter	ATP-binding cassette, sub-family G, member 2; K05681 ATP-binding cassette, subfamily G (WHITE), member 2	PRGDB00169055	Medtr5g103980.1	Putative_R-Genes,_predicted_from_Pythozome	Medicago truncatula	N	ABC-2 type transporter family protein (best arabidopsis hit)	0	2
XP_006607041.1-D203	scaffold13742	150895	151341	-	Reverse transcriptase (RNA-dependent DNA polymerase)	Myosin XI; K10357 myosin V	PRGDB00186672	--	Putative_R-Genes,_collected_from_NCBI_Protein	Arachis hypogaea	NL	Arachis hypogaea clone AHF-205D04 NBS-LRR gene cluster, complete sequence.	6.86e-47	2
XP_008375855.1-D43	scaffold13742	151924	152771	-	Endonuclease/Exonuclease/phosphatase family	Protein transport protein Sec24-like protein; K14007 protein transport protein SEC24	PRGDB00186672	--	Putative_R-Genes,_collected_from_NCBI_Protein	Arachis hypogaea	NL	Arachis hypogaea clone AHF-205D04 NBS-LRR gene cluster, complete sequence.	1.33e-142	2
XP_008346258.1-D129	scaffold13543	21937	22419	+	gag-polypeptide of LTR copia-type	myb-related protein Myb4-like; K09422 myb proto-oncogene protein, plant	PRGDB00215527	MDP0000553601	Putative_R-Genes,_predicted_from_Pythozome	Malus x domestica	TNL	--	5.85e-48	2
XP_003555860.1	scaffold13543	168602	170657	+	Protein phosphatase 2C	probable protein phosphatase 2C 64-like; K01102 pyruvate dehydrogenase phosphatase [EC:3.1.3.43]	PRGDB00189838	Hv.34616	Putative_R-Genes,_predicted_from_NCBI_UniGene	Hordeum vulgare	NL	Hordeum vulgare subsp. vulgare mRNA for predicted protein, partial cds, clone: NIASHv3149K09	1.48e-130	2
XP_006582994.1-D5	scaffold13275	44562	57721	-	Protein tyrosine kinase;Ras family;Transforming protein P21 ras signature	proline-rich receptor-like protein kinase PERK1-like; K04730 interleukin-1 receptor-associated kinase 1 [EC:2.7.11.1]	PRGDB00201609	Bra021250	Putative_R-Genes,_predicted_from_Pythozome	Brassica rapa	RLP	--	4.69e-143	2
XP_007135679.1	scaffold13275	48541	52804	-	Protein tyrosine kinase	proline-rich receptor-like protein kinase PERK1-like; K04730 interleukin-1 receptor-associated kinase 1 [EC:2.7.11.1]	PRGDB00201609	Bra021250	Putative_R-Genes,_predicted_from_Pythozome	Brassica rapa	RLP	--	3.63e-151	2
XP_006604012.1-D2	scaffold13217	110814	132712	-	CRS1 / YhbY (CRM) domain;No apical meristem (NAM) protein;Protein tyrosine kinase	uncharacterized CRM domain-containing protein At3g25440, chloroplastic-like; K01148 poly(A)-specific ribonuclease [EC:3.1.13.4]	PRGDB00216122	MDP0000283975	Putative_R-Genes,_predicted_from_Pythozome	Malus x domestica	RLK	--	1.15e-108	2
XP_012568090.1-D135	scaffold13217	173406	175554	-	TIR domain	Heat shock protein; K03283 heat shock 70kDa protein 1/8; K06758 L1 cell adhesion molecule like protein	PRGDB00069461	Gma.58567	Putative_R-Genes,_predicted_from_NCBI_UniGene	Glycine max	TNL	Glycine max cultivar McCall Rj2	8.02e-74	2
XP_014623565.1-D2	scaffold13125	30877	34130	-	Glycosyl transferases group 1;Sucrose synthase	SS, N-100; sucrose synthase (EC:2.4.1.13); K00695 sucrose synthase [EC:2.4.1.13]	PRGDB00192324	Mtr.12478	Putative_R-Genes,_predicted_from_NCBI_UniGene	Medicago truncatula	TNL	Medicago truncatula Sucrose synthase (MTR_6g081120) mRNA, complete cds	7.07e-55	2
XP_006593976.2	scaffold13125	150303	158586	+	Alanine dehydrogenase/PNT, N-terminal domain;LOR/SDH bifunctional enzyme conserved region;Saccharopine dehydrogenase C-terminal domain;Saccharopine dehydrogenase NADP binding domain	alpha-aminoadipic semialdehyde synthase-like; K14157 alpha-aminoadipic semialdehyde synthase [EC:1.5.1.8 1.5.1.9]	PRGDB00216498	MDP0000177416	Putative_R-Genes,_predicted_from_Pythozome	Malus x domestica	CN	--	0	2
XP_003536089.1-D18	scaffold12959	28737	39138	+	-	Protein kinase 2B; K04733 interleukin-1 receptor-associated kinase 4 [EC:2.7.11.1]	PRGDB00164671	Glyma17g24070.1	Putative_R-Genes,_predicted_from_Pythozome	Glycine max	RLP	Leucine-rich repeat protein kinase family protein (best arabidopsis hit)	1.43e-33	2
XP_008385362.1-D2	scaffold12959	51315	51959	+	-	hypothetical protein; K05681 ATP-binding cassette, subfamily G (WHITE), member 2	PRGDB00188468	Gma.20481	Putative_R-Genes,_predicted_from_NCBI_UniGene	Glycine max	N	PREDICTED: Glycine max ABC transporter G family member 3-like (LOC100799773), mRNA	3.32e-110	2
XP_006602644.1-D579	scaffold12942	107329	107781	-	Leucine Rich Repeat	LRR receptor-like serine/threonine-protein kinase FLS2; K13420 LRR receptor-like serine/threonine-protein kinase FLS2 [EC:2.7.11.1]	PRGDB00159897	Glyma08g18610.1	Putative_R-Genes,_predicted_from_Pythozome	Glycine max	RLP	Leucine-rich receptor-like protein kinase family protein (best arabidopsis hit)	4.5e-70	2
XP_004485486.1	scaffold12942	109047	111867	-	Serine hydroxymethyltransferase	serine hydroxymethyltransferase 7-like; K00600 glycine hydroxymethyltransferase [EC:2.1.2.1]	PRGDB00214085	MDP0000194411	Putative_R-Genes,_predicted_from_Pythozome	Malus x domestica	N	--	1.32e-29	2
XP_007157556.1	scaffold12773	181014	189869	-	Disease resistance protein signature;NB-ARC domain;TIR domain	leucine-rich repeat-containing protein, putative; K19613 leucine-rich repeat protein SHOC2	PRGDB00155449	Glyma01g04590.1	Putative_R-Genes,_predicted_from_Pythozome	Glycine max	TNL	transmembrane receptors;ATP binding (best arabidopsis hit)	0	2
XP_007157556.1-D2	scaffold12773	190319	197345	+	Disease resistance protein signature;NB-ARC domain;TIR domain	leucine-rich repeat-containing protein, putative; K19613 leucine-rich repeat protein SHOC2	PRGDB00216451	MDP0000321952	Putative_R-Genes,_predicted_from_Pythozome	Malus x domestica	TNL	--	1.49e-47	2
XP_008375855.1-D182	scaffold12770	8843	9660	+	Endonuclease/Exonuclease/phosphatase family	Protein transport protein Sec24-like protein; K14007 protein transport protein SEC24	PRGDB00186672	--	Putative_R-Genes,_collected_from_NCBI_Protein	Arachis hypogaea	NL	Arachis hypogaea clone AHF-205D04 NBS-LRR gene cluster, complete sequence.	8.87e-134	2
XP_007141662.1-D2	scaffold12770	19008	19628	-	AP2 domain;Ethylene responsive element binding protein signature	hypothetical protein; K09286 EREBP-like factor	PRGDB00070731	Mdo.689	Putative_R-Genes,_predicted_from_NCBI_UniGene	Malus x domestica	T	Malus x domestica AP2 domain class transcription factor (AP2D43) mRNA, complete cds	4.15e-29	2
XP_002534492.1-D2	scaffold12297	121588	126755	-	Leucine Rich Repeat;Leucine rich repeat N-terminal domain;Protein kinase domain	BRASSINOSTEROID INSENSITIVE 1-associated receptor kinase 1-like; K13416 brassinosteroid insensitive 1-associated receptor kinase 1 [EC:2.7.10.1 2.7.11.1]	PRGDB00188233	Gma.3083	Putative_R-Genes,_predicted_from_NCBI_UniGene	Glycine max	RLP	PREDICTED: Glycine max BRASSINOSTEROID INSENSITIVE 1-associated receptor kinase 1-like, transcript variant 1 (LOC100800522), mRNA	0	2
XP_004485552.1-D62	scaffold12297	135550	140306	-	Leucine Rich Repeat;Leucine rich repeat N-terminal domain;Zinc knuckle	BRASSINOSTEROID INSENSITIVE 1-associated receptor kinase 1-like; K13416 brassinosteroid insensitive 1-associated receptor kinase 1 [EC:2.7.10.1 2.7.11.1]	PRGDB00159911	Glyma08g19270.1	Putative_R-Genes,_predicted_from_Pythozome	Glycine max	RLP	BRI1-associated receptor kinase (best arabidopsis hit)	8.26e-95	2
XP_008375855.1-D77	scaffold1226	50177	50966	+	Endonuclease/Exonuclease/phosphatase family	Protein transport protein Sec24-like protein; K14007 protein transport protein SEC24	PRGDB00186672	--	Putative_R-Genes,_collected_from_NCBI_Protein	Arachis hypogaea	NL	Arachis hypogaea clone AHF-205D04 NBS-LRR gene cluster, complete sequence.	6.8e-125	2
XP_007138799.1-D2	scaffold1226	53911	72378	+	Aldose 1-epimerase	putative glucose-6-phosphate 1-epimerase-like; K01792 glucose-6-phosphate 1-epimerase [EC:5.1.3.15]	PRGDB00201591	Bra013728	Putative_R-Genes,_predicted_from_Pythozome	Brassica rapa	RLP	--	7.21e-128	2
NP_199378.1-D4	scaffold12180	39634	41991	-	PA domain;Peptidase inhibitor I9;Subtilase family;Subtilisin serine protease family (S8) signature	peptidase, putative (EC:3.4.21.25); K18443 golgi-specific brefeldin A-resistance guanine nucleotide exchange factor 1	PRGDB00214989	MDP0000481805	Putative_R-Genes,_predicted_from_Pythozome	Malus x domestica	N	--	0	2
XP_007152413.1	scaffold12180	343639	347093	-	Leucine rich repeat;Leucine rich repeat N-terminal domain;Protein tyrosine kinase	serk1; somatic embryogenesis receptor-like kinase1; K13418 somatic embryogenesis receptor kinase 1 [EC:2.7.10.1 2.7.11.1]	PRGDB00164447	Glyma16g33010.1	Putative_R-Genes,_predicted_from_Pythozome	Glycine max	RLP	Leucine-rich repeat protein kinase family protein (best arabidopsis hit)	0	2
XP_007147540.1	scaffold12128	23188	33940	-	Glycosyl hydrolase family 79, N-terminal domain;Leucine rich repeat;Leucine rich repeat N-terminal domain;Protein tyrosine kinase	heparanase-like protein 2-like; K07964 heparanase 1 [EC:3.2.1.166]	PRGDB00188227	Gma.2638	Putative_R-Genes,_predicted_from_NCBI_UniGene	Glycine max	RLP	PREDICTED: Glycine max probable leucine-rich repeat receptor-like protein kinase At5g49770-like (LOC100810323), mRNA	0	2
XP_004486417.1	scaffold12128	64102	71258	-	Leucine rich repeat N-terminal domain;Protein tyrosine kinase	POPTRDRAFT_756677; hypothetical protein; K04730 interleukin-1 receptor-associated kinase 1 [EC:2.7.11.1]	PRGDB00192302	Mtr.11429	Putative_R-Genes,_predicted_from_NCBI_UniGene	Medicago truncatula	RLP	Medicago truncatula Somatic embryogenesis receptor-like kinase (MTR_2g028580) mRNA, complete cds	0	2
XP_003548415.1	scaffold12097	81774	92499	+	Seven in absentia protein family	hypothetical protein; K04506 E3 ubiquitin-protein ligase SIAH1 [EC:2.3.2.27]	PRGWK00001141	Solyc12g100010.1.1	Contributed_R-Genes	Solanum lycopersicum	RLP	--	2.95e-22	2
XP_004510666.1	scaffold12097	83106	92611	+	Seven in absentia protein family	E3 ubiquitin-protein ligase SINAT3-like; K04506 E3 ubiquitin-protein ligase SIAH1 [EC:2.3.2.27]	PRGWK00001141	Solyc12g100010.1.1	Contributed_R-Genes	Solanum lycopersicum	RLP	--	6.64e-26	2
XP_006598006.1-D6	scaffold12078	22205	25172	-	Leucine Rich Repeat;Protein tyrosine kinase	hypothetical protein; K04733 interleukin-1 receptor-associated kinase 4 [EC:2.7.11.1]	PRGDB00195736	Phvulv091000109m	Putative_R-Genes,_predicted_from_Pythozome	Phaseolus vulgaris	RLP	--	0	2
XP_012572623.1-D149	scaffold12078	60970	61821	-	Protein tyrosine kinase	POPTRDRAFT_762394; hypothetical protein; K04730 interleukin-1 receptor-associated kinase 1 [EC:2.7.11.1]	PRGDB00066905	At.55620	Putative_R-Genes,_predicted_from_NCBI_UniGene	Arabidopsis thaliana	RLK	Arabidopsis thaliana lectin protein kinase family protein (AT5G59270) mRNA, complete cds	2.64e-117	2
XP_012572623.1-D88	scaffold11549	8091	9170	+	Protein tyrosine kinase	probable receptor-like protein kinase At1g67000-like; K04730 interleukin-1 receptor-associated kinase 1 [EC:2.7.11.1]	PRGDB00141957	AcoGoldSmith_v1.017924m	Putative_R-Genes,_predicted_from_Pythozome	Gossypium arboreum	RLP	Leucine-rich repeat receptor-like protein kinase family protein (best arabidopsis hit)	1.64e-142	2
NP_172597.2-D92	scaffold11549	26303	32980	+	Protein tyrosine kinase	probable receptor-like protein kinase At1g67000-like; K04730 interleukin-1 receptor-associated kinase 1 [EC:2.7.11.1]	PRGDB00141957	AcoGoldSmith_v1.017924m	Putative_R-Genes,_predicted_from_Pythozome	Gossypium arboreum	RLP	Leucine-rich repeat receptor-like protein kinase family protein (best arabidopsis hit)	2.17e-131	2
XP_003540159.1	scaffold11543	65585	68530	-	Protein kinase domain	serine/threonine-protein kinase SRK2A-like; K14498 serine/threonine-protein kinase SRK2 [EC:2.7.11.1]	PRGDB00189827	Hv.34453	Putative_R-Genes,_predicted_from_NCBI_UniGene	Hordeum vulgare	NL	Hordeum vulgare subsp. vulgare mRNA for predicted protein, complete cds, clone: NIASHv2106K13	1.39e-163	2
XP_014634583.1	scaffold11543	87317	90796	-	Mlo family	MLO-like protein 4; K08472 mlo protein	PRGDB00159925	Glyma08g20120.1	Putative_R-Genes,_predicted_from_Pythozome	Glycine max	Mlo-like	Seven transmembrane MLO family protein (best arabidopsis hit)	0	2
XP_003517581.1-D9	scaffold10932	61637	63453	+	Sugar (and other) transporter;Sugar transporter signature	inositol transporter 1-like; K08150 MFS transporter, SP family, solute carrier family 2 (myo-inositol transporter), member 13	PRGDB00214649	MDP0000281431	Putative_R-Genes,_predicted_from_Pythozome	Malus x domestica	RLP	--	1.01e-46	2
XP_008390015.1-D19	scaffold10932	286239	298126	-	gag-polypeptide of LTR copia-type;Reverse transcriptase (RNA-dependent DNA polymerase)	uncharacterized LOC104905624; K05658 ATP-binding cassette, subfamily B (MDR/TAP), member 1 [EC:3.6.3.44]	PRGDB00217533	Thhalv10011182m	Putative_R-Genes,_predicted_from_Pythozome	Eutrema halophilum	CN	--	2.2e-34	2
XP_006575301.1	scaffold10789	298920	304871	-	-	-	PRGDB00215645	MDP0000303549	Putative_R-Genes,_predicted_from_Pythozome	Malus x domestica	NL	--	3.01e-76	2
XP_003535753.1	scaffold10789	298920	304871	-	-	-	PRGDB00215645	MDP0000303549	Putative_R-Genes,_predicted_from_Pythozome	Malus x domestica	NL	--	3.01e-76	2
NP_974892.1-D2	scaffold1056	27513	30363	-	-	cellulose synthase A catalytic subunit 8 [UDP-forming]-like; K10999 cellulose synthase A [EC:2.4.1.12]	PRGDB00215771	MDP0000180284	Putative_R-Genes,_predicted_from_Pythozome	Malus x domestica	RLP	--	4.03e-37	2
XP_012573094.1-D33	scaffold1056	27594	28258	-	Protein kinase domain	shaggy-related protein kinase eta; K14502 protein brassinosteroid insensitive 2 [EC:2.7.11.1]	PRGDB00215771	MDP0000180284	Putative_R-Genes,_predicted_from_Pythozome	Malus x domestica	RLP	--	3.02e-49	2
XP_007148303.1-D18	scaffold10086	198133	205226	+	Allergen V5/Tpx-1 family signature;Cysteine-rich secretory protein family;Leucine rich repeat	hypothetical protein; K13449 pathogenesis-related protein 1	PRGDB00194979	Phvulv091014709m	Putative_R-Genes,_predicted_from_Pythozome	Phaseolus vulgaris	RLP	--	3.23e-57	2
XP_003554412.1-D75	scaffold10086	198133	200321	+	Leucine rich repeat;Protein kinase domain	probably inactive leucine-rich repeat receptor-like protein kinase At5g48380; K04730 interleukin-1 receptor-associated kinase 1 [EC:2.7.11.1]	PRGDB00194979	Phvulv091014709m	Putative_R-Genes,_predicted_from_Pythozome	Phaseolus vulgaris	RLP	--	0	2
XP_002520780.1-D2	scaffold9955	186458	187435	-	Protein of unknown function DUF260	uncharacterized LOC102704525; K01227 mannosyl-glycoprotein endo-beta-N-acetylglucosaminidase [EC:3.2.1.96]	PRGWK00002314	Sotub11g029390.1.1	Contributed_R-Genes	Solanum tuberosum	CNL	--	9.61e-45	1
XP_012569349.1-D8	scaffold9953	68179	70351	-	Pyridoxal-dependent decarboxylase conserved domain	tyrosine decarboxylase 1-like; K01592 tyrosine decarboxylase [EC:4.1.1.25]	PRGDB00214154	MDP0000259421	Putative_R-Genes,_predicted_from_Pythozome	Malus x domestica	N	--	2.17e-39	1
XP_008354068.1-D26	scaffold9902	2609	5407	+	Reverse transcriptase (RNA-dependent DNA polymerase)	60S ribosomal export protein NMD3; K07562 nonsense-mediated mRNA decay protein 3	PRGDB00186672	--	Putative_R-Genes,_collected_from_NCBI_Protein	Arachis hypogaea	NL	Arachis hypogaea clone AHF-205D04 NBS-LRR gene cluster, complete sequence.	0	1
XP_004488225.1-D95	scaffold9858	35879	38633	+	Leucine rich repeat;Leucine rich repeat N-terminal domain;Leucine-rich repeat signature;Protein kinase domain	CLV1; receptor protein kinase CLAVATA1; K00924	PRGDB00168395	Medtr5g011540.1	Putative_R-Genes,_predicted_from_Pythozome	Medicago truncatula	RLP	Leucine-rich repeat protein kinase family protein (best arabidopsis hit)	0	1
XP_007146334.1	scaffold9847	21729	26812	-	Glycosyl transferases group 1;Sucrose-6F-phosphate phosphohydrolase;Sucrose synthase	probable sucrose-phosphate synthase 3-like; K00696 sucrose-phosphate synthase [EC:2.4.1.14]	PRGDB00186167	AC152495.1_FGT003	Putative_R-Genes,_predicted_from_Pythozome	Zea mays	CNL	LRR and NB-ARC domains-containing disease resistance protein (best arabidopsis hit); rp1, putative, expressed (best rice hit)	3.9e-30	1
XP_008366187.1-D38	scaffold9841	65876	68314	-	D-mannose binding lectin;Protein kinase domain;S-locus glycoprotein domain	G-type lectin S-receptor-like serine/threonine-protein kinase RLK1; K04733 interleukin-1 receptor-associated kinase 4 [EC:2.7.11.1]	PRGDB00147787	clementine0.9_034484m	Putative_R-Genes,_predicted_from_Pythozome	Citrus clementina	RLK	receptor-like protein kinase 1 (best arabidopsis hit)	6.86e-102	1
XP_003555707.1	scaffold9823	126575	152590	-	Protein kinase domain	serine/threonine-protein kinase SRK2E; K14498 serine/threonine-protein kinase SRK2 [EC:2.7.11.1]	PRGDB00189827	Hv.34453	Putative_R-Genes,_predicted_from_NCBI_UniGene	Hordeum vulgare	NL	Hordeum vulgare subsp. vulgare mRNA for predicted protein, complete cds, clone: NIASHv2106K13	1.92e-142	1
XP_004502492.1	scaffold9819	81358	95676	+	Peptidase dimerisation domain;Peptidase family M20/M25/M40	IAA-amino acid hydrolase ILR1-like 6-like; K14664 IAA-amino acid hydrolase [EC:3.5.1.-]	PRGDB00167788	Medtr2g121840.1	Putative_R-Genes,_predicted_from_Pythozome	Medicago truncatula	RLP	Leucine-rich repeat transmembrane protein kinase protein (best arabidopsis hit)	1.19e-48	1
XP_004513853.1-D191	scaffold9783	140874	143436	+	Integrase core domain;Reverse transcriptase (RNA-dependent DNA polymerase)	uncharacterized LOC103707976; K01191 alpha-mannosidase [EC:3.2.1.24]	PRGDB00061511	disease resistance protein	Putative_R-Genes,_collected_from_NCBI_Protein	Brassica rapa subsp. pekinensis	TNL	Brassica rapa subsp. pekinensis isolate BrTNL10 disease resistance protein gene, complete cds.	1.11e-32	1
XP_008363615.1	scaffold9775	6572	7207	-	AP2 domain;Ethylene responsive element binding protein signature	ethylene-responsive transcription factor 4-like; K09286 EREBP-like factor	PRGDB00070731	Mdo.689	Putative_R-Genes,_predicted_from_NCBI_UniGene	Malus x domestica	T	Malus x domestica AP2 domain class transcription factor (AP2D43) mRNA, complete cds	1.37e-32	1
XP_008365627.1-D179	scaffold9724	163278	163679	+	-	uncharacterized LOC104905624; K05658 ATP-binding cassette, subfamily B (MDR/TAP), member 1 [EC:3.6.3.44]	PRGDB00178373	POPTR_0672s00200.1	Putative_R-Genes,_predicted_from_Pythozome	Populus trichocarpa	RLP	Leucine-rich repeat protein kinase family protein (best arabidopsis hit)	1.71e-40	1
XP_003556014.2-D47	scaffold97	78192	82163	+	Protein tyrosine kinase;Salt stress response/antifungal	Cysteine-rich receptor-like protein kinase; K04733 interleukin-1 receptor-associated kinase 4 [EC:2.7.11.1]	PRGDB00167467	Medtr1g025630.1	Putative_R-Genes,_predicted_from_Pythozome	Medicago truncatula	RLK-GNK2	cysteine-rich RLK (RECEPTOR-like protein kinase) 29 (best arabidopsis hit)	0	1
XP_014625958.1-D2	scaffold9687	130538	134362	+	Protein kinase domain;U-box domain	U-box domain-containing protein 33-like; K04730 interleukin-1 receptor-associated kinase 1 [EC:2.7.11.1]	PRGDB00188804	Gma.43838	Putative_R-Genes,_predicted_from_NCBI_UniGene	Glycine max	CN	PREDICTED: Glycine max U-box domain-containing protein 33-like (LOC100780079), mRNA	0	1
XP_014618662.1	scaffold965	79116	88238	-	Armadillo/beta-catenin-like repeat;Atypical Arm repeat;Importin beta binding domain	hypothetical protein; K10590 E3 ubiquitin-protein ligase TRIP12 [EC:2.3.2.26]	PRGDB00152926	orange1.1g037562m	Putative_R-Genes,_predicted_from_Pythozome	Citrus sinensis	NL	importin alpha isoform 2 (best arabidopsis hit)	0	1
XP_007145032.1	scaffold9623	116683	120136	-	Protein kinase domain	hypothetical protein; K03083 glycogen synthase kinase 3 beta [EC:2.7.11.26]	PRGDB00215771	MDP0000180284	Putative_R-Genes,_predicted_from_Pythozome	Malus x domestica	RLP	--	0	1
XP_006607041.1-D48	scaffold9608	7723	8169	+	Reverse transcriptase (RNA-dependent DNA polymerase)	Myosin XI; K10357 myosin V	PRGDB00186672	--	Putative_R-Genes,_collected_from_NCBI_Protein	Arachis hypogaea	NL	Arachis hypogaea clone AHF-205D04 NBS-LRR gene cluster, complete sequence.	1.77e-46	1
XP_002511172.1	scaffold9597	2285	3570	+	Histone-like transcription factor (CBF/NF-Y) and archaeal histone	hypothetical protein; K08066 nuclear transcription factor Y, gamma	PRGDB00176268	29656.m000483	Putative_R-Genes,_predicted_from_Pythozome	Oryza barthii	Mlo-like	Seven transmembrane MLO family protein (best arabidopsis hit)	6.71e-52	1
XP_006592789.1-D5	scaffold9579	77688	79183	+	-	probable receptor-like protein kinase At1g49730; K04733 interleukin-1 receptor-associated kinase 4 [EC:2.7.11.1]	PRGDB00064900	Aan.23430	Putative_R-Genes,_predicted_from_NCBI_UniGene	Artemisia annua	RLK	CAZI22156.rev CAZI Artemisia annua normalized leaf library Artemisia annua cDNA clone CAZI22156 3', mRNA sequence	3.27e-30	1
XP_004503698.1	scaffold9577	31618	35995	-	Clathrin light chain	-	PRGDB00217007	MDP0000579910	Putative_R-Genes,_predicted_from_Pythozome	Malus x domestica	RLP	--	1.67e-56	1
XP_004496375.1	scaffold9571	35895	42043	+	ABC-2 type transporter;ABC transporter	ATP-binding cassette, sub-family G, member 2; K05681 ATP-binding cassette, subfamily G (WHITE), member 2	PRGDB00188356	Gma.12068	Putative_R-Genes,_predicted_from_NCBI_UniGene	Glycine max	N	PREDICTED: Glycine max ABC transporter G family member 25-like (LOC100812127), mRNA	0	1
XP_006603682.1-D3	scaffold9498	8472	9428	-	Protein of unknown function (DUF640)	-	PRGDB00149354	clementine0.9_000239m	Putative_R-Genes,_predicted_from_Pythozome	Citrus clementina	CNL	NB-ARC domain-containing disease resistance protein (best arabidopsis hit)	1.56e-70	1
XP_014617136.1-D192	scaffold9453	49081	50166	+	Reverse transcriptase (RNA-dependent DNA polymerase)	uncharacterized LOC104905624; K05658 ATP-binding cassette, subfamily B (MDR/TAP), member 1 [EC:3.6.3.44]	PRGDB00047409	TIR-NBS-LRR-TIR type disease resistance protein	Putative_R-Genes,_collected_from_NCBI_Protein	Populus trichocarpa	TNL	Populus trichocarpa clone 110301 TIR-NBS-LRR-TIR type disease resistance protein mRNA, partial cds.	4.45e-51	1
NP_001238448.1-D66	scaffold945	27772	31515	+	Glutathione S-transferase, N-terminal domain;Protein tyrosine kinase	BRASSINOSTEROID INSENSITIVE 1-associated receptor kinase 1-like; K13416 brassinosteroid insensitive 1-associated receptor kinase 1 [EC:2.7.10.1 2.7.11.1]	PRGDB00162350	Glyma13g07060.2	Putative_R-Genes,_predicted_from_Pythozome	Glycine max	RLP	NSP-interacting kinase 1 (best arabidopsis hit)	9.66e-59	1
XP_002527482.1-D32	scaffold9448	53640	55604	-	Disease resistance protein signature;NB-ARC domain	putative disease resistance protein RGA1; K19613 leucine-rich repeat protein SHOC2	PRGDB00195793	Phvulv091001222m	Putative_R-Genes,_predicted_from_Pythozome	Phaseolus vulgaris	NL	--	2.01e-163	1
XP_003548638.1-D2	scaffold9438	50906	52256	+	WRKY DNA -binding domain	WRKY transcription factor 22-like; K13425 WRKY transcription factor 22	PRGDB00049550	TTR1	Putative_R-Genes,_collected_from_NCBI_Protein	Arabidopsis thaliana	TNL	Arabidopsis thaliana TTR1 (WRKY domain family protein 16); transcription factor (TTR1) mRNA, complete cds.	7.94e-33	1
XP_014622968.1-D96	scaffold9427	119247	119903	-	Protein kinase domain	probable receptor-like protein kinase At1g67000; K04730 interleukin-1 receptor-associated kinase 1 [EC:2.7.11.1]	PRGDB00192513	Mtr.24353	Putative_R-Genes,_predicted_from_NCBI_UniGene	Medicago truncatula	RLP	Medicago truncatula Receptor-like kinase (MTR_7g082300) mRNA, complete cds	1.22e-91	1
XP_014624525.1-D2	scaffold9426	37460	39894	-	TLC domain	ASC1-like protein-like; K04710 ceramide synthetase [EC:2.3.1.24]	PRGDB00000029	Asc-1	Reference_R-Genes,_manually_curated	Solanum lycopersicum	Other	Lycopersicon esculentum ASC1 (Asc) gene, Asc-1 allele, complete cds.	4.16e-97	1
NP_199445.1-D72	scaffold9424	91078	94509	-	Leucine Rich Repeat;Leucine rich repeat N-terminal domain;Protein kinase domain	probable LRR receptor-like serine/threonine-protein kinase RPK1; K04730 interleukin-1 receptor-associated kinase 1 [EC:2.7.11.1]	PRGDB00162332	Glyma13g06210.1	Putative_R-Genes,_predicted_from_Pythozome	Glycine max	RLP	receptor-like protein kinase 2 (best arabidopsis hit)	0	1
NP_193747.2-D95	scaffold9421	69966	73029	+	Leucine rich repeat;Leucine Rich Repeat;Leucine rich repeat N-terminal domain;Protein kinase domain	uncharacterized LOC100274594; K04730 interleukin-1 receptor-associated kinase 1 [EC:2.7.11.1]	PRGDB00160832	Glyma09g41110.1	Putative_R-Genes,_predicted_from_Pythozome	Glycine max	RLP	Leucine-rich receptor-like protein kinase family protein (best arabidopsis hit)	0	1
XP_003522288.1-D7	scaffold938	56846	69517	+	Mlo family	MLO-like protein 1-like; K08472 mlo protein	PRGDB00157089	Glyma04g00370.1	Putative_R-Genes,_predicted_from_Pythozome	Glycine max	Mlo-like	Seven transmembrane MLO family protein (best arabidopsis hit)	6.27e-86	1
NP_001235355.1-D4	scaffold9375	140087	140638	-	PsaD	photosystem I reaction center subunit II, chloroplastic-like; K02692 photosystem I subunit II	PRGDB00192813	Smo.15449	Putative_R-Genes,_predicted_from_NCBI_UniGene	Selaginella moellendorffii	N	Selaginella moellendorffii hypothetical protein, mRNA	7.29e-32	1
XP_008373885.1-D241	scaffold9344	73	492	+	gag-polypeptide of LTR copia-type	myb-related protein Myb4-like; K09422 myb proto-oncogene protein, plant	PRGDB00215527	MDP0000553601	Putative_R-Genes,_predicted_from_Pythozome	Malus x domestica	TNL	--	5.25e-38	1
XP_014632591.1-D5	scaffold9312	16206	23600	-	Disease resistance protein signature;NB-ARC domain	putative disease resistance RPP13-like protein 3-like; K13457 disease resistance protein RPM1	PRGDB00188329	Gma.9560	Putative_R-Genes,_predicted_from_NCBI_UniGene	Glycine max	CNL	PREDICTED: Glycine max putative disease resistance protein At1g50180-like (LOC100814688), mRNA	4.16e-133	1
XP_007150326.1-D11	scaffold9304	64376	66155	-	Protein tyrosine kinase	hypothetical protein; K04733 interleukin-1 receptor-associated kinase 4 [EC:2.7.11.1]	PRGDB00207849	Aquca_027_00169.1	Putative_R-Genes,_predicted_from_Pythozome	Aquilegia coerulea	RLP	--	5.7e-126	1
XP_012568090.1-D10	scaffold9295	66763	80396	+	Disease resistance protein signature;NB-ARC domain;TIR domain	TMV resistance protein N-like; K19613 leucine-rich repeat protein SHOC2	PRGDB00155563	Glyma01g27440.1	Putative_R-Genes,_predicted_from_Pythozome	Glycine max	TNL	Disease resistance protein (TIR-NBS-LRR class) family (best arabidopsis hit)	3.94e-36	1
XP_007162586.1-D2	scaffold9291	47358	52935	-	Leucine rich repeat;Leucine rich repeat N-terminal domain;Leucine-rich repeat signature;Protein kinase domain	POPTRDRAFT_1075175; FLAGELLIN-SENSITIVE 2 family protein; K13420 LRR receptor-like serine/threonine-protein kinase FLS2 [EC:2.7.11.1]	PRGDB00173774	ppa019080m	Putative_R-Genes,_predicted_from_Pythozome	Prunus persica	RLP	Protein kinase family protein with leucine-rich repeat domain (best arabidopsis hit)	0	1
XP_007139297.1-D144	scaffold9272	54389	59002	-	Leucine Rich Repeat;Leucine rich repeat N-terminal domain;Protein tyrosine kinase	hypothetical protein; K04730 interleukin-1 receptor-associated kinase 1 [EC:2.7.11.1]	PRGDB00195761	Phvulv091026017m	Putative_R-Genes,_predicted_from_Pythozome	Phaseolus vulgaris	RLP	--	0	1
XP_004507961.1	scaffold9244	86405	91227	+	Protein tyrosine kinase;U-box domain;Universal stress protein family	kinase family protein; K17609 nucleoredoxin [EC:1.8.1.8]	PRGDB00189121	Gma.62448	Putative_R-Genes,_predicted_from_NCBI_UniGene	Glycine max	CN	PREDICTED: Glycine max U-box domain-containing protein 34-like (LOC100805896), mRNA	0	1
XP_002528705.1-D12	scaffold923	151338	153899	+	Carbohydrate-binding protein of the ER;Protein tyrosine kinase	probable receptor-like protein kinase At5g24010; K04730 interleukin-1 receptor-associated kinase 1 [EC:2.7.11.1]	PRGWK00000961	Solyc10g006870.1.1	Contributed_R-Genes	Solanum lycopersicum	Pto-like	--	0	1
XP_012573378.1-D2	scaffold9211	28616	33345	+	Glycosyl transferases group 1;Sucrose synthase	sucrose synthase-like; K00695 sucrose synthase [EC:2.4.1.13]	PRGDB00192324	Mtr.12478	Putative_R-Genes,_predicted_from_NCBI_UniGene	Medicago truncatula	TNL	Medicago truncatula Sucrose synthase (MTR_6g081120) mRNA, complete cds	1.35e-54	1
XP_002510965.1	scaffold9209	89282	98254	-	Leucine Rich Repeat;Leucine rich repeat N-terminal domain;Leucine-rich repeat signature;Protein kinase domain	probable LRR receptor-like serine/threonine-protein kinase At4g08850-like; K04730 interleukin-1 receptor-associated kinase 1 [EC:2.7.11.1]	PRGDB00189109	Gma.62260	Putative_R-Genes,_predicted_from_NCBI_UniGene	Glycine max	RLP	PREDICTED: Glycine max probable LRR receptor-like serine	0	1
XP_003548370.2	scaffold9201	19225	21961	+	Leucine rich repeat;Leucine rich repeat N-terminal domain;Protein kinase domain	probable LRR receptor-like serine/threonine-protein kinase At4g31250; K04730 interleukin-1 receptor-associated kinase 1 [EC:2.7.11.1]	PRGDB00164138	Glyma16g01200.1	Putative_R-Genes,_predicted_from_Pythozome	Glycine max	RLP	Leucine-rich repeat protein kinase family protein (best arabidopsis hit)	0	1
XP_008383731.1-D13	scaffold9195	10990	14201	+	Protein kinase domain	L-type lectin-domain containing receptor kinase VII.1-like; K04733 interleukin-1 receptor-associated kinase 4 [EC:2.7.11.1]	PRGDB00067385	Bna.28951	Putative_R-Genes,_predicted_from_NCBI_UniGene	Brassica napus	RLK	0162451 Brassica napus Flower Brassica napus cDNA, mRNA sequence	2.13e-98	1
NP_178984.1	scaffold9176	52602	54578	+	ABC-2 type transporter;ABC transporter	ppabcg12; ATP-binding cassette transporter, subfamily G, member 12, group WBC protein PpABCG12; K05681 ATP-binding cassette, subfamily G (WHITE), member 2	PRGDB00188359	Gma.12533	Putative_R-Genes,_predicted_from_NCBI_UniGene	Glycine max	N	PREDICTED: Glycine max ABC transporter G family member 5-like (LOC100789722), mRNA	0	1
XP_012568090.1-D6	scaffold9164	10465	25520	-	Disease resistance protein signature;NB-ARC domain;TIR domain	TMV resistance protein N-like; K19613 leucine-rich repeat protein SHOC2	PRGDB00168161	Medtr4g011970.1	Putative_R-Genes,_predicted_from_Pythozome	Medicago truncatula	NL	Disease resistance protein (TIR-NBS-LRR class) family (best arabidopsis hit)	0	1
XP_002535568.1-D3	scaffold9110	804	1769	-	NADH-plastoquinone oxidoreductase chain 5 signature;NADH-ubiquinone oxidoreductase chain 5 signature;Proton-conducting membrane transporter	A subunit of NADH dehydrogenase; K05577 NAD(P)H-quinone oxidoreductase subunit 5 [EC:1.6.5.3]	PRGDB00182943	GSVIVT01004101001	Putative_R-Genes,_predicted_from_Pythozome	Vitis vinifera	NL	NB-ARC domain-containing disease resistance protein (best arabidopsis hit)	3.01e-30	1
XP_008354068.1-D143	scaffold9103	27427	30009	+	Reverse transcriptase (RNA-dependent DNA polymerase)	60S ribosomal export protein NMD3; K07562 nonsense-mediated mRNA decay protein 3	PRGDB00186672	--	Putative_R-Genes,_collected_from_NCBI_Protein	Arachis hypogaea	NL	Arachis hypogaea clone AHF-205D04 NBS-LRR gene cluster, complete sequence.	0	1
NP_001276274.1-D66	scaffold9091	210193	212253	+	Cyclin, N-terminal domain	hypothetical protein; K05681 ATP-binding cassette, subfamily G (WHITE), member 2	PRGDB00195563	Phvulv091025821m	Putative_R-Genes,_predicted_from_Pythozome	Phaseolus vulgaris	N	--	5.02e-42	1
XP_006603025.1-D2	scaffold908	105705	106952	+	Ribosomal protein L23;Ribosomal protein L23, N-terminal domain	60S ribosomal protein L23a-1-like; K02893 large subunit ribosomal protein L23Ae	PRGDB00186222	GRMZM2G060054_T03	Putative_R-Genes,_predicted_from_Pythozome	Zea mays	CNL	ribosomal protein L23AB (best arabidopsis hit); expressed protein (best rice hit)	5.01e-53	1
XP_004503474.1	scaffold9078	1083	4687	-	Leucine Rich repeats (2 copies);Leucine-rich repeat signature	protein phosphatase 1 regulatory subunit pprA; K17550 protein phosphatase 1 regulatory subunit 7	PRGWK00000073	MELO3C004581	Contributed_R-Genes	Cucumis melo	RLP	--	3.77e-177	1
XP_007160217.1	scaffold9059	60068	63413	-	Protein kinase domain;Universal stress protein family	hypothetical protein; K17609 nucleoredoxin [EC:1.8.1.8]	PRGWK00000178	MELO3C011467	Contributed_R-Genes	Cucumis melo	RLK	--	1.56e-175	1
XP_007148482.1-D10	scaffold9029	75801	82604	-	Protein kinase domain	hypothetical protein; K13414 mitogen-activated protein kinase kinase kinase 1, plant [EC:2.7.11.25]	PRGDB00213451	MDP0000295586	Putative_R-Genes,_predicted_from_Pythozome	Malus x domestica	T	--	4.58e-31	1
XP_008375855.1-D34	scaffold9025	13796	14644	-	Endonuclease/Exonuclease/phosphatase family	Protein transport protein Sec24-like protein; K14007 protein transport protein SEC24	PRGDB00186672	--	Putative_R-Genes,_collected_from_NCBI_Protein	Arachis hypogaea	NL	Arachis hypogaea clone AHF-205D04 NBS-LRR gene cluster, complete sequence.	2.12e-148	1
XP_004500442.1	scaffold8987	36803	43801	+	Protein of unknown function DUF260	uncharacterized LOC102704525; K01227 mannosyl-glycoprotein endo-beta-N-acetylglucosaminidase [EC:3.2.1.96]	PRGWK00002314	Sotub11g029390.1.1	Contributed_R-Genes	Solanum tuberosum	CNL	--	1.09e-38	1
XP_003535237.1-D25	scaffold897	132119	138031	-	Leucine rich repeat;Leucine rich repeat N-terminal domain;Leucine-rich repeat signature;Protein kinase domain	CLV1; receptor protein kinase CLAVATA1; K00924	PRGDB00167542	Medtr1g094070.1	Putative_R-Genes,_predicted_from_Pythozome	Medicago truncatula	RLP	Leucine-rich receptor-like protein kinase family protein (best arabidopsis hit)	0	1
XP_008375855.1-D40	scaffold894	48270	49118	-	Endonuclease/Exonuclease/phosphatase family	Protein transport protein Sec24-like protein; K14007 protein transport protein SEC24	PRGDB00186672	--	Putative_R-Genes,_collected_from_NCBI_Protein	Arachis hypogaea	NL	Arachis hypogaea clone AHF-205D04 NBS-LRR gene cluster, complete sequence.	8.71e-144	1
XP_007159914.1-D3	scaffold8922	39801	42287	-	Protein kinase domain	SPK-3; protein kinase 3; K14498 serine/threonine-protein kinase SRK2 [EC:2.7.11.1]	PRGDB00189827	Hv.34453	Putative_R-Genes,_predicted_from_NCBI_UniGene	Hordeum vulgare	NL	Hordeum vulgare subsp. vulgare mRNA for predicted protein, complete cds, clone: NIASHv2106K13	2.26e-160	1
XP_006607041.1-D45	scaffold8916	22851	23483	+	Reverse transcriptase (RNA-dependent DNA polymerase)	Myosin XI; K10357 myosin V	PRGDB00186672	--	Putative_R-Genes,_collected_from_NCBI_Protein	Arachis hypogaea	NL	Arachis hypogaea clone AHF-205D04 NBS-LRR gene cluster, complete sequence.	6.19e-83	1
XP_008390015.1-D9	scaffold890	93312	97660	-	gag-polypeptide of LTR copia-type;Reverse transcriptase (RNA-dependent DNA polymerase)	uncharacterized LOC104905624; K05658 ATP-binding cassette, subfamily B (MDR/TAP), member 1 [EC:3.6.3.44]	PRGDB00217533	Thhalv10011182m	Putative_R-Genes,_predicted_from_Pythozome	Eutrema halophilum	CN	--	2.54e-34	1
XP_012574773.1	scaffold8899	100109	109258	-	Leucine rich repeat;Leucine rich repeat N-terminal domain;Protein kinase domain	Kinase family protein with leucine-rich repeat domain, putative; K00924	PRGDB00155372	Glyma01g01080.1	Putative_R-Genes,_predicted_from_Pythozome	Glycine max	RLP	Protein kinase family protein with leucine-rich repeat domain (best arabidopsis hit)	0	1
XP_008358557.1-D113	scaffold8884	30021	32372	-	Leucine Rich Repeat;Protein kinase domain	receptor-like protein kinase HSL1; K00924	PRGDB00068368	Ghi.3088	Putative_R-Genes,_predicted_from_NCBI_UniGene	Gossypium hirsutum	RLP	UFL_601_17 Cotton fiber 0-10 day post anthesis Gossypium hirsutum cDNA, mRNA sequence	3.59e-114	1
XP_008387729.1-D3	scaffold8871	15651	18624	+	Ras family;Transforming protein P21 ras signature	ras-related protein RABE1c; K07901 Ras-related protein Rab-8A	PRGDB00202169	Bra007015	Putative_R-Genes,_predicted_from_Pythozome	Brassica rapa	RLP	--	1.36e-119	1
XP_006607041.1-D2	scaffold8863	207041	207397	+	-	Myosin XI; K10357 myosin V	PRGDB00186672	--	Putative_R-Genes,_collected_from_NCBI_Protein	Arachis hypogaea	NL	Arachis hypogaea clone AHF-205D04 NBS-LRR gene cluster, complete sequence.	6.63e-48	1
XP_007143674.1	scaffold8860	111084	112876	+	Protein of unknown function DUF260	uncharacterized LOC102704525; K01227 mannosyl-glycoprotein endo-beta-N-acetylglucosaminidase [EC:3.2.1.96]	PRGWK00002314	Sotub11g029390.1.1	Contributed_R-Genes	Solanum tuberosum	CNL	--	2.05e-65	1
XP_007142329.1	scaffold8847	87895	88581	-	AP2 domain;Ethylene responsive element binding protein signature	ethylene-responsive transcription factor 3-like; K09286 EREBP-like factor	PRGDB00070731	Mdo.689	Putative_R-Genes,_predicted_from_NCBI_UniGene	Malus x domestica	T	Malus x domestica AP2 domain class transcription factor (AP2D43) mRNA, complete cds	1.71e-28	1
XP_004510375.1	scaffold8843	35577	42269	-	Root hair defective 3 GTP-binding protein (RHD3)	-	PRGDB00203535	Carubv10019685m	Putative_R-Genes,_predicted_from_Pythozome	Capsella rubella	CN	--	0	1
XP_004515994.1	scaffold881	749	30783	+	Mlo family	MLO-like protein 12-like; K08472 mlo protein	PRGDB00164293	Glyma16g26090.1	Putative_R-Genes,_predicted_from_Pythozome	Glycine max	Mlo-like	Seven transmembrane MLO family protein (best arabidopsis hit)	0	1
XP_007148482.1-D7	scaffold878	319899	324891	+	Protein kinase domain	hypothetical protein; K13414 mitogen-activated protein kinase kinase kinase 1, plant [EC:2.7.11.25]	PRGDB00213451	MDP0000295586	Putative_R-Genes,_predicted_from_Pythozome	Malus x domestica	T	--	1.69e-39	1
XP_012574118.1	scaffold8767	76275	93830	-	DnaJ domain;DnaJ domain signature	dnaJ homolog subfamily B member 6-A; K09512 DnaJ homolog subfamily B member 6	PRGDB00188945	Gma.56835	Putative_R-Genes,_predicted_from_NCBI_UniGene	Glycine max	RLP	PREDICTED: Glycine max probable LRR receptor-like serine	1.01e-32	1
XP_008354068.1-D31	scaffold8758	13599	16448	+	Reverse transcriptase (RNA-dependent DNA polymerase)	60S ribosomal export protein NMD3; K07562 nonsense-mediated mRNA decay protein 3	PRGDB00186672	--	Putative_R-Genes,_collected_from_NCBI_Protein	Arachis hypogaea	NL	Arachis hypogaea clone AHF-205D04 NBS-LRR gene cluster, complete sequence.	0	1
XP_002521135.1-D15	scaffold8725	222603	226201	+	Leucine rich repeat N-terminal domain;Protein kinase domain	receptor protein kinase CLAVATA1; K00924	PRGDB00187728	Gma.2496	Putative_R-Genes,_predicted_from_NCBI_UniGene	Glycine max	RLP	Glycine max clone cw128 receptor-like protein kinase mRNA, complete cds	0	1
NP_176339.1-D123	scaffold8722	27627	45196	+	Protein tyrosine kinase	G-type lectin S-receptor-like serine/threonine-protein kinase At1g11410; K04733 interleukin-1 receptor-associated kinase 4 [EC:2.7.11.1]	PRGDB00175910	POPTR_0004s02560.1	Putative_R-Genes,_predicted_from_Pythozome	Populus trichocarpa	RLK-GNK2	cysteine-rich RLK (RECEPTOR-like protein kinase) 10 (best arabidopsis hit)	1.06e-87	1
XP_008362066.1-D171	scaffold8720	447	1049	-	Domain of unknown function (DUF4219);gag-polypeptide of LTR copia-type	Far upstream element-binding protein; K13210 far upstream element-binding protein	PRGDB00184523	GSVIVT01037631001	Putative_R-Genes,_predicted_from_Pythozome	Vitis vinifera	CNL	NB-ARC domain-containing disease resistance protein (best arabidopsis hit)	8.9e-80	1
XP_007133997.1	scaffold8710	208967	212005	-	Protein kinase domain	protein kinase APK1B, chloroplastic-like; K04733 interleukin-1 receptor-associated kinase 4 [EC:2.7.11.1]	PRGDB00207849	Aquca_027_00169.1	Putative_R-Genes,_predicted_from_Pythozome	Aquilegia coerulea	RLP	--	0	1
XP_007131785.1-D4	scaffold8696	304440	307863	-	PAN-like domain;Protein kinase domain;S-locus glycoprotein domain	G-type lectin S-receptor-like serine/threonine-protein kinase At4g03230; K04733 interleukin-1 receptor-associated kinase 4 [EC:2.7.11.1]	PRGDB00148816	clementine0.9_004892m	Putative_R-Genes,_predicted_from_Pythozome	Citrus clementina	RLK-GNK2	cysteine-rich RLK (RECEPTOR-like protein kinase) 10 (best arabidopsis hit)	1.55e-131	1
XP_007154557.1-D2	scaffold8684	93459	98681	-	Beta-ketoacyl synthase, C-terminal domain;Beta-ketoacyl synthase, N-terminal domain	hypothetical protein; K09458 3-oxoacyl-[acyl-carrier-protein] synthase II [EC:2.3.1.179]	PRGDB00217051	MDP0000182032	Putative_R-Genes,_predicted_from_Pythozome	Malus x domestica	T	--	0	1
XP_002528705.1-D16	scaffold8683	106495	109023	+	Carbohydrate-binding protein of the ER;Protein tyrosine kinase	hypothetical protein; K04733 interleukin-1 receptor-associated kinase 4 [EC:2.7.11.1]	PRGWK00000961	Solyc10g006870.1.1	Contributed_R-Genes	Solanum lycopersicum	Pto-like	--	0	1
NP_176196.1-D8	scaffold8673	98957	126111	+	ABC-2 type transporter;ABC transporter;ABC-transporter extracellular N-terminal	ATP-binding cassette, sub-family G, member 2; K05681 ATP-binding cassette, subfamily G (WHITE), member 2	PRGDB00194825	Phvulv091008534m	Putative_R-Genes,_predicted_from_Pythozome	Phaseolus vulgaris	N	--	0	1
NP_196925.2-D2	scaffold8658	12189	16126	-	Leucine rich repeat;Protein tyrosine kinase	systemin receptor SR160-like; K13415 protein brassinosteroid insensitive 1 [EC:2.7.10.1 2.7.11.1]	PRGDB00188678	Gma.35940	Putative_R-Genes,_predicted_from_NCBI_UniGene	Glycine max	RLP	PREDICTED: Glycine max probable inactive leucine-rich repeat receptor-like protein kinase At3g03770-like (LOC100780663), mRNA	0	1
XP_003548405.1	scaffold8655	17666	20910	-	CRS1 / YhbY (CRM) domain	-	PRGDB00213507	MDP0000288100	Putative_R-Genes,_predicted_from_Pythozome	Malus x domestica	NL	--	0	1
XP_012570732.1-D2	scaffold8652	201426	208042	-	Protein tyrosine kinase;Universal stress protein family	hypothetical protein; K17609 nucleoredoxin [EC:1.8.1.8]	PRGWK00000178	MELO3C011467	Contributed_R-Genes	Cucumis melo	RLK	--	0	1
XP_007160891.1-D5	scaffold8574	168753	169484	+	Cyclin, C-terminal domain	putative cyclin-A3-1; K06627 cyclin A	PRGDB00217072	MDP0000261726	Putative_R-Genes,_predicted_from_Pythozome	Malus x domestica	RLP	--	5.29e-48	1
XP_002517216.1-D2	scaffold8548	40955	42722	+	Sugar (and other) transporter;Sugar transporter signature	inositol transporter 1; K08150 MFS transporter, SP family, solute carrier family 2 (myo-inositol transporter), member 13	PRGDB00201715	Bra001175	Putative_R-Genes,_predicted_from_Pythozome	Brassica rapa	TNL	--	1.87e-57	1
XP_004509103.1-D98	scaffold853	84869	85597	+	-	hypothetical protein; K04730 interleukin-1 receptor-associated kinase 1 [EC:2.7.11.1]	PRGDB00189094	Gma.61990	Putative_R-Genes,_predicted_from_NCBI_UniGene	Glycine max	RLP	PREDICTED: Glycine max probable inactive leucine-rich repeat receptor-like protein kinase At1g66830-like (LOC100807517), mRNA	1.57e-130	1
XP_004513818.1-D4	scaffold8523	81638	84485	+	Sugar (and other) transporter;Sugar transporter signature	inositol transporter 1-like; K08150 MFS transporter, SP family, solute carrier family 2 (myo-inositol transporter), member 13	PRGDB00214649	MDP0000281431	Putative_R-Genes,_predicted_from_Pythozome	Malus x domestica	RLP	--	9e-52	1
XP_007138872.1-D176	scaffold8506	125795	127261	-	Leucine Rich Repeat;Protein tyrosine kinase	probably inactive leucine-rich repeat receptor-like protein kinase At5g48380-like; K04730 interleukin-1 receptor-associated kinase 1 [EC:2.7.11.1]	PRGDB00149295	evm.model.supercontig_14.64	Putative_R-Genes,_predicted_from_Pythozome	Arabidopsis lyrata subsp. lyrata	RLP	Leucine-rich repeat protein kinase family protein (best arabidopsis hit)	0	1
XP_008387729.1	scaffold85	218525	220549	+	Ras family;Transforming protein P21 ras signature	hypothetical protein; K07901 Ras-related protein Rab-8A	PRGDB00202169	Bra007015	Putative_R-Genes,_predicted_from_Pythozome	Brassica rapa	RLP	--	1.36e-115	1
XP_002517677.1-D101	scaffold8480	55464	57719	-	Leucine Rich Repeat;Leucine rich repeat N-terminal domain;Leucine-rich repeat signature	LRR receptor-like serine/threonine-protein kinase FLS2-like; K13420 LRR receptor-like serine/threonine-protein kinase FLS2 [EC:2.7.11.1]	PRGWK00000007	MELO3C002280	Contributed_R-Genes	Cucumis melo	RLP	--	0	1
XP_003545033.1	scaffold8449	43401	48804	+	Thioredoxin	thioredoxin domain-containing protein 9 homolog; K02995 small subunit ribosomal protein S8e	PRGDB00183512	GSVIVT01018889001	Putative_R-Genes,_predicted_from_Pythozome	Vitis vinifera	CNL	HOPZ-ACTIVATED RESISTANCE 1 (best arabidopsis hit)	4.41e-119	1
NP_172592.1-D16	scaffold8421	78228	79948	+	Sugar (and other) transporter;Sugar transporter signature	inositol transporter 1-like; K08150 MFS transporter, SP family, solute carrier family 2 (myo-inositol transporter), member 13	PRGDB00214649	MDP0000281431	Putative_R-Genes,_predicted_from_Pythozome	Malus x domestica	RLP	--	1.53e-50	1
XP_004509947.1	scaffold8383	148191	150899	+	Protein tyrosine kinase	hypothetical protein; K04733 interleukin-1 receptor-associated kinase 4 [EC:2.7.11.1]	PRGDB00078803	Vvi.12916	Putative_R-Genes,_predicted_from_NCBI_UniGene	Vitis vinifera	N	PREDICTED: Vitis vinifera hypothetical protein LOC100262734 (LOC100262734), mRNA	0	1
XP_004507136.1-D5	scaffold8367	150161	151270	-	Leucine rich repeat;Leucine rich repeat N-terminal domain;Leucine-rich repeat signature	hypothetical protein; K13420 LRR receptor-like serine/threonine-protein kinase FLS2 [EC:2.7.11.1]	PRGWK00000321	MELO3C023962	Contributed_R-Genes	Cucumis melo	RLP	--	2.67e-173	1
XP_014626645.1	scaffold8347	207175	210496	+	Leucine Rich Repeat;Leucine rich repeat N-terminal domain;Protein kinase domain	hypothetical protein; K13418 somatic embryogenesis receptor kinase 1 [EC:2.7.10.1 2.7.11.1]	PRGDB00188854	Gma.48636	Putative_R-Genes,_predicted_from_NCBI_UniGene	Glycine max	RLP	PREDICTED: Glycine max protein NSP-INTERACTING KINASE 1-like (LOC100798412), mRNA	0	1
XP_007150847.1-D4	scaffold8343	75872	81484	-	Leucine rich repeat;Leucine rich repeat N-terminal domain;Protein kinase domain	probable LRR receptor-like serine/threonine-protein kinase At4g31250; K04730 interleukin-1 receptor-associated kinase 1 [EC:2.7.11.1]	PRGDB00196399	Phvulv091001815m	Putative_R-Genes,_predicted_from_Pythozome	Phaseolus vulgaris	RLP	--	0	1
XP_003529180.1-D76	scaffold8325	17103	21343	-	Leucine rich repeat;Protein tyrosine kinase	systemin receptor SR160; K13415 protein brassinosteroid insensitive 1 [EC:2.7.10.1 2.7.11.1]	PRGDB00195794	Phvulv091028462m	Putative_R-Genes,_predicted_from_Pythozome	Phaseolus vulgaris	RLP	--	0	1
XP_008386144.1-D4	scaffold8298	66845	75136	+	Leucine rich repeat	ABC transporter B family member 28; K05655 ATP-binding cassette, subfamily B (MDR/TAP), member 8	PRGWK00000223	MELO3C016523	Contributed_R-Genes	Cucumis melo	RLP	--	6.85e-27	1
NP_186862.3-D2	scaffold8292	89900	93680	-	Leucine rich repeat;Leucine Rich Repeat;Leucine rich repeat N-terminal domain;Protein kinase domain	probable LRR receptor-like serine/threonine-protein kinase RPK1; K04730 interleukin-1 receptor-associated kinase 1 [EC:2.7.11.1]	PRGDB00196100	Phvulv091009239m	Putative_R-Genes,_predicted_from_Pythozome	Phaseolus vulgaris	RLP	--	0	1
XP_007160878.1	scaffold8270	91320	92510	+	-	hypothetical protein; K02984 small subunit ribosomal protein S3Ae	PRGWK00000226	MELO3C016775	Contributed_R-Genes	Cucumis melo	RLP	--	0	1
XP_003518609.1-D2	scaffold8246	134159	135304	+	Mitochondrial carrier protein	POPTRDRAFT_559351; mitochondrial substrate carrier family protein; K15111 solute carrier family 25 (mitochondrial S-adenosylmethionine transporter), member 26	PRGDB00216316	MDP0000248430	Putative_R-Genes,_predicted_from_Pythozome	Malus x domestica	N	--	1.13e-173	1
XP_012570563.1-D40	scaffold824	24215	25809	+	Reverse transcriptase (RNA-dependent DNA polymerase)	uncharacterized LOC104905624; K05658 ATP-binding cassette, subfamily B (MDR/TAP), member 1 [EC:3.6.3.44]	PRGDB00047409	TIR-NBS-LRR-TIR type disease resistance protein	Putative_R-Genes,_collected_from_NCBI_Protein	Populus trichocarpa	TNL	Populus trichocarpa clone 110301 TIR-NBS-LRR-TIR type disease resistance protein mRNA, partial cds.	1.43e-47	1
XP_002518580.1-D30	scaffold8220	225300	225827	-	ABC transporter	-	PRGDB00149322	evm.model.supercontig_146.34	Putative_R-Genes,_predicted_from_Pythozome	Arabidopsis lyrata subsp. lyrata	N	pleiotropic drug resistance 9 (best arabidopsis hit)	5.23e-31	1
NP_197417.1-D18	scaffold8199	116444	120413	-	GDSL/SGNH-like Acyl-Esterase family found in Pmr5 and Cas1p;Protein kinase domain	serine-threonine protein kinase, plant-type, putative (EC:2.7.10.2); K04733 interleukin-1 receptor-associated kinase 4 [EC:2.7.11.1]	PRGDB00177510	POPTR_0001s28330.1	Putative_R-Genes,_predicted_from_Pythozome	Populus trichocarpa	RLK-GNK2	cysteine-rich RLK (RECEPTOR-like protein kinase) 3 (best arabidopsis hit)	1.62e-28	1
XP_003540499.1	scaffold8172	161698	165515	+	Ubiquitin-binding domain	-	PRGDB00201186	Bra039669	Putative_R-Genes,_predicted_from_Pythozome	Brassica rapa	N	--	1.01e-53	1
XP_003544671.1-D2	scaffold8159	57461	67890	-	GAT domain;VHS domain	baculoviral IAP repeat-containing protein 6-like; K10581 ubiquitin-conjugating enzyme E2 O [EC:2.3.2.24]	PRGDB00216535	MDP0000279752	Putative_R-Genes,_predicted_from_Pythozome	Malus x domestica	N	--	1.18e-26	1
XP_008372622.1-D246	scaffold8156	4	501	-	gag-polypeptide of LTR copia-type	myb-related protein Myb4-like; K09422 myb proto-oncogene protein, plant	PRGDB00215527	MDP0000553601	Putative_R-Genes,_predicted_from_Pythozome	Malus x domestica	TNL	--	2.55e-53	1
XP_006607041.1-D91	scaffold8110	56984	57616	+	Reverse transcriptase (RNA-dependent DNA polymerase)	Myosin XI; K10357 myosin V	PRGDB00186672	--	Putative_R-Genes,_collected_from_NCBI_Protein	Arachis hypogaea	NL	Arachis hypogaea clone AHF-205D04 NBS-LRR gene cluster, complete sequence.	1.77e-80	1
XP_007135636.1-D11	scaffold8062	20435	28951	+	ABC-2 type transporter;ABC transporter;ABC-transporter extracellular N-terminal;Plant PDR ABC transporter associated	hypothetical protein; K05681 ATP-binding cassette, subfamily G (WHITE), member 2	PRGDB00188456	Gma.19859	Putative_R-Genes,_predicted_from_NCBI_UniGene	Glycine max	N	PREDICTED: Glycine max pleiotropic drug resistance protein 1-like (LOC100810505), mRNA	0	1
XP_008347144.1-D111	scaffold805	35492	35917	+	-	myb-related protein Myb4-like; K09422 myb proto-oncogene protein, plant	PRGDB00215527	MDP0000553601	Putative_R-Genes,_predicted_from_Pythozome	Malus x domestica	TNL	--	2.69e-33	1
XP_008387315.1-D3	scaffold8027	116756	206039	-	Endonuclease/Exonuclease/phosphatase family;Reverse transcriptase (RNA-dependent DNA polymerase);zinc-binding in reverse transcriptase	uncharacterized LOC103414113; K18577 mannosylglycoprotein endo-beta-mannosidase [EC:3.2.1.152]	PRGDB00047409	TIR-NBS-LRR-TIR type disease resistance protein	Putative_R-Genes,_collected_from_NCBI_Protein	Populus trichocarpa	TNL	Populus trichocarpa clone 110301 TIR-NBS-LRR-TIR type disease resistance protein mRNA, partial cds.	2.98e-111	1
XP_008354068.1-D248	scaffold8006	59740	61824	-	Endonuclease/Exonuclease/phosphatase family;Reverse transcriptase (RNA-dependent DNA polymerase)	Myosin XI; K10357 myosin V	PRGDB00186672	--	Putative_R-Genes,_collected_from_NCBI_Protein	Arachis hypogaea	NL	Arachis hypogaea clone AHF-205D04 NBS-LRR gene cluster, complete sequence.	0	1
XP_007152836.1	scaffold8001	107671	110866	-	Protein tyrosine kinase	proline-rich receptor-like protein kinase PERK1; K04730 interleukin-1 receptor-associated kinase 1 [EC:2.7.11.1]	PRGDB00201609	Bra021250	Putative_R-Genes,_predicted_from_Pythozome	Brassica rapa	RLP	--	1.01e-153	1
XP_014617941.1	scaffold7996	23250	29795	-	Protein tyrosine kinase;Tyrosine kinase catalytic domain signature	protein kinase, putative (EC:2.7.10.2); K17535 serine/threonine-protein kinase TNNI3K [EC:2.7.11.1]	PRGDB00216122	MDP0000283975	Putative_R-Genes,_predicted_from_Pythozome	Malus x domestica	RLK	--	4.11e-115	1
XP_002533985.1-D490	scaffold7994	184944	189429	-	Protein kinase domain	probable LRR receptor-like serine/threonine-protein kinase At4g08850; K04730 interleukin-1 receptor-associated kinase 1 [EC:2.7.11.1]	PRGDB00164108	Glyma15g40320.1	Putative_R-Genes,_predicted_from_Pythozome	Glycine max	RLP	Leucine-rich receptor-like protein kinase family protein (best arabidopsis hit)	2.92e-105	1
XP_004511955.1	scaffold7973	14606	22318	+	Leucine rich repeat N-terminal domain;p21-C-terminal region-binding protein;Protein tyrosine kinase	protein BCCIP homolog; K15262 protein BCP1	PRGDB00158143	Glyma05g37960.1	Putative_R-Genes,_predicted_from_Pythozome	Glycine max	RLP	Leucine-rich repeat protein kinase family protein (best arabidopsis hit)	0	1
XP_007163551.1	scaffold796	276290	278728	-	Protein kinase domain	putative serine/threonine-protein kinase-like protein CCR3; K04730 interleukin-1 receptor-associated kinase 1 [EC:2.7.11.1]	PRGWK00000759	Solyc05g052590.1.1	Contributed_R-Genes	Solanum lycopersicum	Pto-like	--	0	1
XP_004501144.1-D351	scaffold7940	186070	187359	+	Leucine rich repeat;Leucine rich repeat N-terminal domain;Leucine-rich repeat signature	hypothetical protein; K02984 small subunit ribosomal protein S3Ae	PRGWK00000748	Solyc05g026240.1.1	Contributed_R-Genes	Solanum lycopersicum	RLP	--	1.14e-177	1
XP_003554373.1	scaffold7932	8907	13013	-	3-dehydroquinate synthase (EC 4.6.1.3)	-	PRGDB00183145	GSVIVT01011374001	Putative_R-Genes,_predicted_from_Pythozome	Vitis vinifera	RLP	--	0	1
NP_194047.2-D11	scaffold7894	133319	225176	+	Protein kinase domain;Reverse transcriptase (RNA-dependent DNA polymerase)	Kinase family protein with leucine-rich repeat domain, putative; K00924	PRGDB00164199	Glyma16g08570.1	Putative_R-Genes,_predicted_from_Pythozome	Glycine max	RLP	Protein kinase family protein with leucine-rich repeat domain (best arabidopsis hit)	0	1
XP_003556014.2-D6	scaffold7886	82448	93514	+	Protein tyrosine kinase;Salt stress response/antifungal	cysteine-rich receptor-like protein kinase 25; K04733 interleukin-1 receptor-associated kinase 4 [EC:2.7.11.1]	PRGDB00168386	Medtr5g005710.1	Putative_R-Genes,_predicted_from_Pythozome	Medicago truncatula	RLK-GNK2	cysteine-rich RLK (RECEPTOR-like protein kinase) 10 (best arabidopsis hit)	0	1
XP_007146996.1	scaffold7876	75091	78868	+	-	F-box/LRR-repeat protein 3-like; K10268 F-box and leucine-rich repeat protein 2/20	PRGWK00001242	Sotub01g037760.1.1	Contributed_R-Genes	Solanum tuberosum	RLP	--	7.89e-93	1
XP_007141662.1	scaffold7867	120065	120724	-	AP2 domain;Ethylene responsive element binding protein signature	hypothetical protein; K09286 EREBP-like factor	PRGDB00070731	Mdo.689	Putative_R-Genes,_predicted_from_NCBI_UniGene	Malus x domestica	T	Malus x domestica AP2 domain class transcription factor (AP2D43) mRNA, complete cds	4.07e-27	1
XP_002517677.1-D3	scaffold7857	33182	77117	-	Leucine rich repeat;Leucine rich repeat N-terminal domain;Protein kinase domain	LRR receptor-like serine/threonine-protein kinase EFR; K13428 LRR receptor-like serine/threonine-protein kinase EFR [EC:2.7.11.1]	PRGDB00195085	Phvulv091017856m	Putative_R-Genes,_predicted_from_Pythozome	Phaseolus vulgaris	RLP	--	0	1
XP_007139688.1-D15	scaffold7833	4127	4810	-	Leucine rich repeat;Leucine rich repeat N-terminal domain	hypothetical protein; K04730 interleukin-1 receptor-associated kinase 1 [EC:2.7.11.1]	PRGDB00063098	protein kinase	Putative_R-Genes,_collected_from_NCBI_Protein	Glycine max	RLP	Glycine max clone 8070616 protein kinase mRNA, complete cds.	2.54e-105	1
XP_014631324.1	scaffold7789	115923	117971	-	-	-	PRGDB00065877	At.3076	Putative_R-Genes,_predicted_from_NCBI_UniGene	Arabidopsis thaliana	TNL	Arabidopsis thaliana WRKY19; transcription factor (WRKY19) mRNA, complete cds	5.53e-72	1
XP_014618662.1-D2	scaffold7777	13109	17496	-	Armadillo/beta-catenin-like repeat;Atypical Arm repeat;Importin beta binding domain	hypothetical protein; K10590 E3 ubiquitin-protein ligase TRIP12 [EC:2.3.2.26]	PRGDB00152926	orange1.1g037562m	Putative_R-Genes,_predicted_from_Pythozome	Citrus sinensis	NL	importin alpha isoform 2 (best arabidopsis hit)	0	1
NP_177209.1	scaffold7770	86629	89711	+	Protein kinase domain;Salt stress response/antifungal	cysteine-rich receptor-like protein kinase 3; K04733 interleukin-1 receptor-associated kinase 4 [EC:2.7.11.1]	PRGDB00196615	Phvulv091025077m	Putative_R-Genes,_predicted_from_Pythozome	Phaseolus vulgaris	RLK-GNK2	--	0	1
NP_199283.1-D17	scaffold7732	121847	131286	+	Leucine rich repeat;Leucine Rich Repeat;Leucine-rich repeat signature;Protein tyrosine kinase	LRR receptor-like serine/threonine-protein kinase FLS2; K13420 LRR receptor-like serine/threonine-protein kinase FLS2 [EC:2.7.11.1]	PRGDB00156500	Glyma03g03170.1	Putative_R-Genes,_predicted_from_Pythozome	Glycine max	RLP	Protein kinase family protein with leucine-rich repeat domain (best arabidopsis hit)	0	1
XP_007162607.1-D8	scaffold7698	205531	207107	-	Pyridoxal-dependent decarboxylase conserved domain	tyrosine decarboxylase 1; K01592 tyrosine decarboxylase [EC:4.1.1.25]	PRGDB00214154	MDP0000259421	Putative_R-Genes,_predicted_from_Pythozome	Malus x domestica	N	--	7.83e-60	1
XP_002533978.1-D59	scaffold7669	171654	174401	-	Fructose-bisphosphate aldolase class-I;Protein kinase domain	BRASSINOSTEROID INSENSITIVE 1-associated receptor kinase 1 precursor, putative (EC:2.7.10.1); K13418 somatic embryogenesis receptor kinase 1 [EC:2.7.10.1 2.7.11.1]	PRGDB00196335	Phvulv091016128m	Putative_R-Genes,_predicted_from_Pythozome	Phaseolus vulgaris	RLP	--	4.18e-55	1
XP_004504818.1-D13	scaffold7663	80413	85825	+	ABC-2 type transporter	hypothetical protein; K05681 ATP-binding cassette, subfamily G (WHITE), member 2	PRGDB00159658	Glyma08g07530.1	Putative_R-Genes,_predicted_from_Pythozome	Glycine max	N	white-brown complex homolog protein 11 (best arabidopsis hit)	3.65e-128	1
XP_004496399.1	scaffold7650	124848	129617	+	Leucine Rich Repeat;Leucine rich repeat N-terminal domain;Protein kinase domain	somatic embryogenesis receptor kinase 2-like; K13418 somatic embryogenesis receptor kinase 1 [EC:2.7.10.1 2.7.11.1]	PRGDB00161242	Glyma10g36280.1	Putative_R-Genes,_predicted_from_Pythozome	Glycine max	RLP	somatic embryogenesis receptor-like kinase 1 (best arabidopsis hit)	0	1
XP_006574820.1-D26	scaffold7646	80588	82180	+	70kDa heat shock protein signature;Hsp70 protein	probable mediator of RNA polymerase II transcription subunit 37c-like; K03283 heat shock 70kDa protein 1/8; K06758 L1 cell adhesion molecule like protein	PRGDB00167710	Medtr2g047020.1	Putative_R-Genes,_predicted_from_Pythozome	Medicago truncatula	TNL	heat shock cognate protein 70-1 (best arabidopsis hit)	2.03e-156	1
XP_007162147.1	scaffold7645	198481	202700	-	Disease resistance protein signature;Leucine rich repeat;Leucine Rich Repeat;NB-ARC domain;TIR domain	hypothetical protein; K19613 leucine-rich repeat protein SHOC2	PRGDB00189055	Gma.61241	Putative_R-Genes,_predicted_from_NCBI_UniGene	Glycine max	TNL	PREDICTED: Glycine max TMV resistance protein N-like (LOC100815486), mRNA	0	1
XP_012570419.1-D24	scaffold7632	89778	90336	-	-	uncharacterized LOC100245431; K05387 glutamate receptor, ionotropic, plant	PRGDB00188818	Gma.45040	Putative_R-Genes,_predicted_from_NCBI_UniGene	Glycine max	NL	PREDICTED: Glycine max putative disease resistance protein At4g11170-like (LOC100803552), mRNA	4.38e-29	1
XP_007152490.1-D3	scaffold7620	21279	25566	+	Disease resistance protein signature;NB-ARC domain;TIR domain	hypothetical protein; K19613 leucine-rich repeat protein SHOC2	PRGDB00167760	Medtr2g097790.1	Putative_R-Genes,_predicted_from_Pythozome	Medicago truncatula	TNL	disease resistance protein (TIR-NBS-LRR class), putative (best arabidopsis hit)	0	1
XP_004501092.1-D164	scaffold7615	227552	228376	+	Protein kinase domain	Leucine-rich repeat protein kinase family protein, putative; K13420 LRR receptor-like serine/threonine-protein kinase FLS2 [EC:2.7.11.1]	PRGDB00183628	GSVIVT01021648001	Putative_R-Genes,_predicted_from_Pythozome	Vitis vinifera	RLP	Leucine-rich repeat transmembrane protein kinase (best arabidopsis hit)	6.91e-27	1
XP_007141287.1	scaffold760	136220	138442	-	Transcription initiation factor IIA, gamma subunit;Transcription initiation factor IIA, gamma subunit, helical domain	hypothetical protein; K03123 transcription initiation factor TFIIA small subunit	PRGDB00061449	Xa5	Reference_R-Genes,_manually_curated	Oryza sativa Indica Group	Other	Oryza sativa (indica cultivar-group) transcription factor IIA gamma subunit (TFIIAy) mRNA, partial cds.	2.59e-62	1
XP_003543502.1-D12	scaffold7581	17964	19086	+	Ras family;Transforming protein P21 ras signature	ras-related protein RABE1c; K07901 Ras-related protein Rab-8A	PRGDB00202169	Bra007015	Putative_R-Genes,_predicted_from_Pythozome	Brassica rapa	RLP	--	8.36e-89	1
XP_002535359.1	scaffold7579	41554	42122	-	Respiratory-chain NADH dehydrogenase, 30 Kd subunit	nad9, GlmaxMp61; NADH dehydrogenase subunit 9; K03936 NADH dehydrogenase (ubiquinone) Fe-S protein 3 [EC:1.6.5.3 1.6.99.3]	PRGWK00001170	Sotub01g008290.1.1	Contributed_R-Genes	Solanum tuberosum	RLK-GNK2	--	9.57e-33	1
XP_004513081.1	scaffold7568	144279	148557	-	Carbohydrate-binding protein of the ER;Leucine rich repeat;Protein tyrosine kinase	hypothetical protein; K16224 senescence-induced receptor-like serine/threonine-protein kinase	PRGDB00159163	Glyma07g15270.1	Putative_R-Genes,_predicted_from_Pythozome	Glycine max	RLP	root hair specific 16 (best arabidopsis hit)	0	1
NP_200249.1-D3	scaffold7565	41136	43634	+	Carbohydrate-binding protein of the ER;Protein tyrosine kinase	probable receptor-like protein kinase At5g24010; K04730 interleukin-1 receptor-associated kinase 1 [EC:2.7.11.1]	PRGWK00001072	Solyc11g072910.1.1	Contributed_R-Genes	Solanum lycopersicum	Pto-like	--	0	1
XP_004511327.2-D147	scaffold7563	75180	76049	-	Protein kinase domain	putative serine/threonine-protein kinase-like protein CCR3; K04730 interleukin-1 receptor-associated kinase 1 [EC:2.7.11.1]	PRGWK00001041	Solyc11g020230.1.1	Contributed_R-Genes	Solanum lycopersicum	Pto-like	--	6.37e-124	1
XP_014629389.1-D4	scaffold7554	36261	37979	+	Carbohydrate-binding module 48 (Isoamylase N-terminal domain)	1,4-alpha-glucan-branching enzyme 2-1, chloroplastic/amyloplastic-like; K00700 1,4-alpha-glucan branching enzyme [EC:2.4.1.18]	PRGDB00202237	Bra017241	Putative_R-Genes,_predicted_from_Pythozome	Brassica rapa	N	--	2.24e-57	1
XP_004490737.1	scaffold7542	284249	287972	-	Homodimerisation region of STAR domain protein	KH domain-containing protein At3g08620-like; K14945 protein quaking	PRGDB00213184	MDP0000285888	Putative_R-Genes,_predicted_from_Pythozome	Malus x domestica	CNL	--	3.29e-68	1
NP_001240990.1-D4	scaffold751	20106	28561	+	-	peptidyl-prolyl cis-trans isomerase CYP40-like; K05864 peptidyl-prolyl isomerase D [EC:5.2.1.8]	PRGDB00177734	30138.m004038	Putative_R-Genes,_predicted_from_Pythozome	Oryza barthii	N	Protein kinase superfamily protein (best arabidopsis hit)	1.06e-23	1
XP_003555067.1	scaffold750	109243	112212	-	Protein tyrosine kinase;Salt stress response/antifungal	cysteine-rich receptor-like protein kinase 3; K04733 interleukin-1 receptor-associated kinase 4 [EC:2.7.11.1]	PRGDB00188366	Gma.12889	Putative_R-Genes,_predicted_from_NCBI_UniGene	Glycine max	RLK-GNK2	PREDICTED: Glycine max cysteine-rich receptor-like protein kinase 42-like (LOC100790404), mRNA	0	1
XP_002514536.1-D295	scaffold7478	97365	97915	+	Protein tyrosine kinase	hypothetical protein; K13418 somatic embryogenesis receptor kinase 1 [EC:2.7.10.1 2.7.11.1]	PRGDB00196335	Phvulv091016128m	Putative_R-Genes,_predicted_from_Pythozome	Phaseolus vulgaris	RLP	--	6.44e-88	1
XP_003549277.1-D2	scaffold7477	70339	73228	-	Leucine rich repeat	hypothetical protein; K19613 leucine-rich repeat protein SHOC2	PRGWK00000043	MELO3C003949	Contributed_R-Genes	Cucumis melo	RLP	--	6.75e-141	1
NP_197417.1-D15	scaffold7472	153298	157127	-	GDSL/SGNH-like Acyl-Esterase family found in Pmr5 and Cas1p;Protein kinase domain	serine-threonine protein kinase, plant-type, putative (EC:2.7.10.2); K04733 interleukin-1 receptor-associated kinase 4 [EC:2.7.11.1]	PRGDB00194454	Pgl.16506	Putative_R-Genes,_predicted_from_NCBI_UniGene	Picea glauca	RLK-GNK2	Picea glauca clone GQ03518_C06 mRNA sequence	1.88e-27	1
XP_003540949.1	scaffold7437	53516	60380	-	Mlo family	MLO-like protein 12-like; K08472 mlo protein	PRGDB00162010	Glyma12g13950.1	Putative_R-Genes,_predicted_from_Pythozome	Glycine max	Mlo-like	Seven transmembrane MLO family protein (best arabidopsis hit)	6.42e-151	1
XP_003527064.1	scaffold7429	72646	78655	-	ABC-2 family transporter protein;ABC transporter	ATP-binding cassette superfamily; K05641 ATP-binding cassette, subfamily A (ABC1), member 1	PRGDB00078512	Vvi.298	Putative_R-Genes,_predicted_from_NCBI_UniGene	Vitis vinifera	N	PREDICTED: Vitis vinifera hypothetical protein LOC100258795, transcript variant 1 (LOC100258795), mRNA	0	1
XP_007143192.1	scaffold7400	22621	83253	+	Protein kinase domain;Protein tyrosine kinase;Salt stress response/antifungal	cysteine-rich receptor-like protein kinase 10; K04730 interleukin-1 receptor-associated kinase 1 [EC:2.7.11.1]	PRGDB00188295	Gma.7519	Putative_R-Genes,_predicted_from_NCBI_UniGene	Glycine max	RLK-GNK2	PREDICTED: Glycine max cysteine-rich receptor-like protein kinase 6-like (LOC100807113), mRNA	7.03e-24	1
XP_002511730.1	scaffold7399	2853	60363	+	Protein of unknown function DUF260	LOB domain-containing protein 16; K13944	PRGDB00213803	MDP0000322059	Putative_R-Genes,_predicted_from_Pythozome	Malus x domestica	RLP	--	6.34e-43	1
XP_006607041.1-D51	scaffold7370	88484	89116	-	Reverse transcriptase (RNA-dependent DNA polymerase)	Myosin XI; K10357 myosin V	PRGDB00186672	--	Putative_R-Genes,_collected_from_NCBI_Protein	Arachis hypogaea	NL	Arachis hypogaea clone AHF-205D04 NBS-LRR gene cluster, complete sequence.	2.54e-82	1
XP_012571014.1-D15	scaffold7369	127718	129807	-	-	hypothetical protein; K17609 nucleoredoxin [EC:1.8.1.8]	PRGDB00167827	Medtr3g009640.2	Putative_R-Genes,_predicted_from_Pythozome	Medicago truncatula	CN	U-box domain-containing protein kinase family protein (best arabidopsis hit)	3.44e-85	1
XP_002531806.1-D4	scaffold7360	141906	150347	+	Leucine rich repeat;Protein kinase domain	hypothetical protein; K04730 interleukin-1 receptor-associated kinase 1 [EC:2.7.11.1]	PRGDB00195428	Phvulv091027156m	Putative_R-Genes,_predicted_from_Pythozome	Phaseolus vulgaris	RLP	--	0	1
NP_189066.1	scaffold7339	143717	147572	+	Leucine rich repeat;Leucine rich repeat N-terminal domain;Leucine-rich repeat signature;Protein kinase domain	Receptor-like protein kinase; K17422 large subunit ribosomal protein L41	PRGDB00195058	Phvulv091000517m	Putative_R-Genes,_predicted_from_Pythozome	Phaseolus vulgaris	RLP	--	0	1
XP_006589537.1-D12	scaffold7324	31637	35329	-	ABC transporter;B3 DNA binding domain;Pectinacetylesterase	ATP-binding cassette, sub-family G, member 2; K05681 ATP-binding cassette, subfamily G (WHITE), member 2	PRGDB00161223	Glyma10g35310.2	Putative_R-Genes,_predicted_from_Pythozome	Glycine max	N	P-loop containing nucleoside triphosphate hydrolases superfamily protein (best arabidopsis hit)	4.75e-58	1
XP_006607041.1-D130	scaffold7309	116796	117428	+	Reverse transcriptase (RNA-dependent DNA polymerase)	Myosin XI; K10357 myosin V	PRGDB00186672	--	Putative_R-Genes,_collected_from_NCBI_Protein	Arachis hypogaea	NL	Arachis hypogaea clone AHF-205D04 NBS-LRR gene cluster, complete sequence.	3.17e-79	1
XP_003527294.1	scaffold7305	229294	231889	+	Protein phosphatase 2C	probable protein phosphatase 2C 27-like; K14803 protein phosphatase 2C homolog 2/3 [EC:3.1.3.16]	PRGDB00213421	MDP0000280399	Putative_R-Genes,_predicted_from_Pythozome	Malus x domestica	RLP	--	0	1
XP_004506126.1-D2	scaffold73	138799	145468	+	Transmembrane amino acid transporter protein	hypothetical protein; K14209 solute carrier family 36 (proton-coupled amino acid transporter)	PRGDB00192408	Mtr.17858	Putative_R-Genes,_predicted_from_NCBI_UniGene	Medicago truncatula	NL	Medicago truncatula NBS resistance protein (MTR_4g055630) mRNA, complete cds	1.27e-87	1
XP_007161512.1-D8	scaffold7286	176630	178892	+	Protein kinase domain;Wall-associated receptor kinase galacturonan-binding	hypothetical protein; K04733 interleukin-1 receptor-associated kinase 4 [EC:2.7.11.1]	PRGDB00081328	Qro.14128	Putative_R-Genes,_predicted_from_NCBI_UniGene	Cucumis sativus	RLK	FN640787 SSH Quercus robur one year old cuttings Quercus robur cDNA clone WZ0AQRAL3YN20FM1, mRNA sequence	3.95e-124	1
XP_006601749.1-D15	scaffold7285	356388	358174	+	Serine hydroxymethyltransferase	serine hydroxymethyltransferase 5; K00600 glycine hydroxymethyltransferase [EC:2.1.2.1]	PRGDB00214085	MDP0000194411	Putative_R-Genes,_predicted_from_Pythozome	Malus x domestica	N	--	2.09e-60	1
NP_188064.1-D246	scaffold7259	62181	62570	-	NB-ARC domain	hypothetical protein; K19613 leucine-rich repeat protein SHOC2	PRGDB00167806	Medtr3g005620.1	Putative_R-Genes,_predicted_from_Pythozome	Medicago truncatula	NL	NB-ARC domain-containing disease resistance protein (best arabidopsis hit)	1.39e-59	1
NP_001235355.1-D2	scaffold7241	16658	17290	-	PsaD	photosystem I reaction center subunit II, chloroplastic-like; K02692 photosystem I subunit II	PRGDB00192813	Smo.15449	Putative_R-Genes,_predicted_from_NCBI_UniGene	Selaginella moellendorffii	N	Selaginella moellendorffii hypothetical protein, mRNA	1.71e-79	1
XP_003526266.1-D13	scaffold7210	29658	30416	-	Protein kinase domain	shaggy-related protein kinase eta-like; K14502 protein brassinosteroid insensitive 2 [EC:2.7.11.1]	PRGDB00215524	MDP0000250138	Putative_R-Genes,_predicted_from_Pythozome	Malus x domestica	RLP	--	9.87e-65	1
NP_178291.1-D4	scaffold7207	92515	96364	-	Leucine Rich Repeat;Leucine rich repeat N-terminal domain;Protein tyrosine kinase	probable receptor protein kinase TMK1; K17285 selenium-binding protein 1	PRGDB00168042	Medtr3g104610.1	Putative_R-Genes,_predicted_from_Pythozome	Medicago truncatula	RLP	Leucine-rich repeat protein kinase family protein (best arabidopsis hit)	0	1
XP_008354068.1-D5	scaffold7202	123287	126136	-	Reverse transcriptase (RNA-dependent DNA polymerase)	60S ribosomal export protein NMD3; K07562 nonsense-mediated mRNA decay protein 3	PRGDB00186672	--	Putative_R-Genes,_collected_from_NCBI_Protein	Arachis hypogaea	NL	Arachis hypogaea clone AHF-205D04 NBS-LRR gene cluster, complete sequence.	0	1
XP_008359953.1-D42	scaffold7185	9651	11055	+	-	Clc chloride channel; K05016 chloride channel 7	PRGDB00188255	Gma.4681	Putative_R-Genes,_predicted_from_NCBI_UniGene	Glycine max	RLP	PREDICTED: Glycine max probable LRR receptor-like serine	8.68e-84	1
NP_173166.2-D55	scaffold7170	98203	101263	-	Leucine rich repeat N-terminal domain;Protein kinase domain	receptor-like protein kinase HSL1; K00924	PRGDB00157283	Glyma04g09380.1	Putative_R-Genes,_predicted_from_Pythozome	Glycine max	RLP	Leucine-rich receptor-like protein kinase family protein (best arabidopsis hit)	0	1
XP_002533989.1-D5	scaffold717	187114	187932	-	Ring finger domain	RING-H2 finger protein ATL46-like; K19041 E3 ubiquitin-protein ligase RNF38/44 [EC:2.3.2.27]	PRGDB00078682	Vvi.8276	Putative_R-Genes,_predicted_from_NCBI_UniGene	Vitis vinifera	NL	PREDICTED: Vitis vinifera hypothetical protein LOC100250803 (LOC100250803), mRNA	4.22e-103	1
XP_008388897.1-D227	scaffold7159	99851	100459	+	-	myb-related protein Myb4-like; K09422 myb proto-oncogene protein, plant	PRGDB00215527	MDP0000553601	Putative_R-Genes,_predicted_from_Pythozome	Malus x domestica	TNL	--	5.66e-59	1
XP_014634000.1-D948	scaffold715	103311	103661	+	Reverse transcriptase (RNA-dependent DNA polymerase)	uncharacterized LOC103696395; K13356 alcohol-forming fatty acyl-CoA reductase [EC:1.2.1.84]	PRGDB00061511	disease resistance protein	Putative_R-Genes,_collected_from_NCBI_Protein	Brassica rapa subsp. pekinensis	TNL	Brassica rapa subsp. pekinensis isolate BrTNL10 disease resistance protein gene, complete cds.	8.89e-43	1
XP_014633012.1-D49	scaffold7141	46952	47377	+	Reverse transcriptase (RNA-dependent DNA polymerase)	pre-mRNA polyadenylation factor fip-1-like; K12741 heterogeneous nuclear ribonucleoprotein A1/A3	PRGDB00206841	LOC_Os04g53040.1	Putative_R-Genes,_predicted_from_Pythozome	Oryza sativa	NL	--	1.07e-51	1
XP_014630706.1-D7	scaffold714	253624	263723	-	Protein kinase domain;Protein tyrosine kinase;Wall-associated receptor kinase galacturonan-binding	wall-associated receptor kinase-like 1; K04733 interleukin-1 receptor-associated kinase 4 [EC:2.7.11.1]	PRGDB00000490	RFO1	Reference_R-Genes,_manually_curated	Arabidopsis thaliana	RLK	Arabidopsis thaliana RFO1 (RESISTANCE TO FUSARIUM OXYSPORUM 1); kinase (RFO1) mRNA, complete cds.	5.42e-139	1
XP_007143060.1-D20	scaffold7136	149564	151687	-	Leucine rich repeat N-terminal domain;Protein kinase domain	Os01g0819100; Similar to predicted protein.; K04733 interleukin-1 receptor-associated kinase 4 [EC:2.7.11.1]	PRGDB00188466	Gma.20349	Putative_R-Genes,_predicted_from_NCBI_UniGene	Glycine max	RLP	PREDICTED: Glycine max probable inactive receptor kinase At5g58300-like, transcript variant 1 (LOC100818444), mRNA	0	1
XP_007146497.1	scaffold7134	325179	329613	-	Tetraacyldisaccharide-1-P 4'-kinase	probable tetraacyldisaccharide 4'-kinase, mitochondrial-like; K00912 tetraacyldisaccharide 4'-kinase [EC:2.7.1.130]	PRGDB00202501	Bra036019	Putative_R-Genes,_predicted_from_Pythozome	Brassica rapa	TNL	--	4.75e-142	1
XP_006607041.1-D105	scaffold7099	52188	52796	-	Reverse transcriptase (RNA-dependent DNA polymerase)	Myosin XI; K10357 myosin V	PRGDB00186672	--	Putative_R-Genes,_collected_from_NCBI_Protein	Arachis hypogaea	NL	Arachis hypogaea clone AHF-205D04 NBS-LRR gene cluster, complete sequence.	4.26e-73	1
XP_007143787.1	scaffold7028	294946	296885	+	Leucine rich repeat	Receptor-like protein kinase; K17422 large subunit ribosomal protein L41	PRGWK00000727	Solyc05g009990.1.1	Contributed_R-Genes	Solanum lycopersicum	RLP	--	5.47e-173	1
XP_014617136.1-D81	scaffold7025	19860	20977	+	Reverse transcriptase (RNA-dependent DNA polymerase)	uncharacterized LOC100245431; K05387 glutamate receptor, ionotropic, plant	PRGDB00188818	Gma.45040	Putative_R-Genes,_predicted_from_NCBI_UniGene	Glycine max	NL	PREDICTED: Glycine max putative disease resistance protein At4g11170-like (LOC100803552), mRNA	5.05e-31	1
XP_004506220.1-D3	scaffold7009	103976	107177	-	Leucine rich repeat;Leucine Rich Repeat;Leucine rich repeat N-terminal domain;Protein tyrosine kinase	probable receptor protein kinase TMK1; K00924	PRGDB00196686	Phvulv091021569m	Putative_R-Genes,_predicted_from_Pythozome	Phaseolus vulgaris	RLP	--	0	1
XP_002518113.1	scaffold6986	58672	67868	+	G protein beta WD-40 repeat signature;LisH;WD domain, G-beta repeat	uncharacterized LOC100217300; K14963 COMPASS component SWD3	PRGDB00215548	MDP0000187349	Putative_R-Genes,_predicted_from_Pythozome	Malus x domestica	NL	--	7.5e-78	1
XP_008354068.1-D69	scaffold6984	234716	237582	-	Reverse transcriptase (RNA-dependent DNA polymerase)	60S ribosomal export protein NMD3; K07562 nonsense-mediated mRNA decay protein 3	PRGDB00186672	--	Putative_R-Genes,_collected_from_NCBI_Protein	Arachis hypogaea	NL	Arachis hypogaea clone AHF-205D04 NBS-LRR gene cluster, complete sequence.	0	1
XP_003530591.1	scaffold6981	113753	118915	-	1-deoxy-D-xylulose-5-phosphate synthase;Transketolase, C-terminal domain;Transketolase, pyrimidine binding domain	probable 1-deoxy-D-xylulose-5-phosphate synthase 2, chloroplastic-like; K01662 1-deoxy-D-xylulose-5-phosphate synthase [EC:2.2.1.7]	PRGDB00067001	At.66955	Putative_R-Genes,_predicted_from_NCBI_UniGene	Arabidopsis thaliana	RPW8-NL	Arabidopsis thaliana mRNA for ADR1, complete cds, clone: RAFL15-45-C23	8.7e-119	1
NP_173166.2-D133	scaffold6974	186222	188559	+	Leucine rich repeat N-terminal domain;Protein tyrosine kinase	hypothetical protein; K04730 interleukin-1 receptor-associated kinase 1 [EC:2.7.11.1]	PRGDB00164990	Glyma18g48170.1	Putative_R-Genes,_predicted_from_Pythozome	Glycine max	RLP	BAK1-interacting receptor-like kinase 1 (best arabidopsis hit)	0	1
XP_002528881.1-D88	scaffold6955	210751	251004	-	D-mannose binding lectin;Protein tyrosine kinase	G-type lectin S-receptor-like serine/threonine-protein kinase RLK1; K04733 interleukin-1 receptor-associated kinase 4 [EC:2.7.11.1]	PRGDB00078676	Vvi.7945	Putative_R-Genes,_predicted_from_NCBI_UniGene	Vitis vinifera	RLK	PREDICTED: Vitis vinifera hypothetical protein LOC100261425 (LOC100261425), mRNA	4.95e-116	1
XP_004513853.1-D55	scaffold6942	61063	63684	-	Integrase core domain;Reverse transcriptase (RNA-dependent DNA polymerase)	uncharacterized LOC103707976; K01191 alpha-mannosidase [EC:3.2.1.24]	PRGDB00061511	disease resistance protein	Putative_R-Genes,_collected_from_NCBI_Protein	Brassica rapa subsp. pekinensis	TNL	Brassica rapa subsp. pekinensis isolate BrTNL10 disease resistance protein gene, complete cds.	6.02e-34	1
XP_008347144.1-D155	scaffold694	42155	42541	+	-	myb-related protein Myb4-like; K09422 myb proto-oncogene protein, plant	PRGDB00215527	MDP0000553601	Putative_R-Genes,_predicted_from_Pythozome	Malus x domestica	TNL	--	7.15e-33	1
XP_006607041.1-D129	scaffold6882	15013	15645	+	Reverse transcriptase (RNA-dependent DNA polymerase)	Myosin XI; K10357 myosin V	PRGDB00186672	--	Putative_R-Genes,_collected_from_NCBI_Protein	Arachis hypogaea	NL	Arachis hypogaea clone AHF-205D04 NBS-LRR gene cluster, complete sequence.	1.25e-77	1
XP_006607041.1-D87	scaffold6873	239338	239970	-	Reverse transcriptase (RNA-dependent DNA polymerase)	Myosin XI; K10357 myosin V	PRGDB00186672	--	Putative_R-Genes,_collected_from_NCBI_Protein	Arachis hypogaea	NL	Arachis hypogaea clone AHF-205D04 NBS-LRR gene cluster, complete sequence.	2.03e-82	1
XP_002509547.1-D2	scaffold6805	102764	107360	-	Leucine rich repeat;Protein tyrosine kinase	hypothetical protein; K13420 LRR receptor-like serine/threonine-protein kinase FLS2 [EC:2.7.11.1]	PRGDB00164178	Glyma16g06440.1	Putative_R-Genes,_predicted_from_Pythozome	Glycine max	RLP	Leucine-rich repeat protein kinase family protein (best arabidopsis hit)	0	1
XP_007149537.1-D4	scaffold6739	4870	12748	+	Di-glucose binding within endoplasmic reticulum;Eukaryotic aspartyl protease;Protein tyrosine kinase	Leucine-rich repeat family protein / protein kinase family protein; K04733 interleukin-1 receptor-associated kinase 4 [EC:2.7.11.1]	PRGDB00167733	Medtr2g090750.1	Putative_R-Genes,_predicted_from_Pythozome	Medicago truncatula	RLP	Leucine-rich repeat transmembrane protein kinase (best arabidopsis hit)	0	1
XP_004507203.1	scaffold6701	98919	105180	-	Leucine rich repeat;Protein tyrosine kinase	hypothetical protein; K04730 interleukin-1 receptor-associated kinase 1 [EC:2.7.11.1]	PRGDB00196354	Phvulv091027120m	Putative_R-Genes,_predicted_from_Pythozome	Phaseolus vulgaris	RLP	--	0	1
XP_004514300.1-D131	scaffold6689	5839	10403	-	Mitochondrial carrier protein;NB-ARC domain;Ras family	Heat shock protein; K03283 heat shock 70kDa protein 1/8; K06758 L1 cell adhesion molecule like protein	PRGDB00195228	Phvulv091001547m	Putative_R-Genes,_predicted_from_Pythozome	Phaseolus vulgaris	CNL	--	0	1
XP_004494629.1	scaffold6667	69821	70600	-	Histone-like transcription factor (CBF/NF-Y) and archaeal histone	nuclear transcription factor Y subunit C-3-like; K08066 nuclear transcription factor Y, gamma	PRGDB00176268	29656.m000483	Putative_R-Genes,_predicted_from_Pythozome	Oryza barthii	Mlo-like	Seven transmembrane MLO family protein (best arabidopsis hit)	2.06e-73	1
XP_012572883.1-D551	scaffold6637	122641	123928	+	Reverse transcriptase (RNA-dependent DNA polymerase)	uncharacterized LOC104905624; K05658 ATP-binding cassette, subfamily B (MDR/TAP), member 1 [EC:3.6.3.44]	PRGDB00217533	Thhalv10011182m	Putative_R-Genes,_predicted_from_Pythozome	Eutrema halophilum	CN	--	3e-50	1
NP_850456.2-D8	scaffold6614	81186	84525	+	Protein kinase domain	glycerophosphodiester phosphodiesterase protein kinase domain-containing GDPDL2-like; K04733 interleukin-1 receptor-associated kinase 4 [EC:2.7.11.1]	PRGDB00081328	Qro.14128	Putative_R-Genes,_predicted_from_NCBI_UniGene	Cucumis sativus	RLK	FN640787 SSH Quercus robur one year old cuttings Quercus robur cDNA clone WZ0AQRAL3YN20FM1, mRNA sequence	3.32e-113	1
XP_006607041.1-D53	scaffold6604	237992	238624	+	Reverse transcriptase (RNA-dependent DNA polymerase)	Myosin XI; K10357 myosin V	PRGDB00186672	--	Putative_R-Genes,_collected_from_NCBI_Protein	Arachis hypogaea	NL	Arachis hypogaea clone AHF-205D04 NBS-LRR gene cluster, complete sequence.	1.29e-81	1
XP_007159957.1-D11	scaffold6587	651	5447	-	FF domain;RNA recognition motif 2	pre-mRNA-processing protein 40A-like; K12821 pre-mRNA-processing factor 40	PRGDB00168305	Medtr4g120740.1	Putative_R-Genes,_predicted_from_Pythozome	Medicago truncatula	N	white-brown complex homolog protein 11 (best arabidopsis hit)	1.03e-31	1
NP_181467.1-D9	scaffold6586	45807	47660	-	ABC-2 type transporter;ABC transporter	ppabcg12; ATP-binding cassette transporter, subfamily G, member 12, group WBC protein PpABCG12; K05681 ATP-binding cassette, subfamily G (WHITE), member 2	PRGDB00196278	Phvulv091007026m	Putative_R-Genes,_predicted_from_Pythozome	Phaseolus vulgaris	N	--	0	1
XP_006607041.1-D126	scaffold6568	250483	250929	+	Reverse transcriptase (RNA-dependent DNA polymerase)	Myosin XI; K10357 myosin V	PRGDB00186672	--	Putative_R-Genes,_collected_from_NCBI_Protein	Arachis hypogaea	NL	Arachis hypogaea clone AHF-205D04 NBS-LRR gene cluster, complete sequence.	3.4e-49	1
XP_004512092.1-D2	scaffold6538	319660	320895	-	Leucine rich repeat;Leucine Rich Repeat	probable LRR receptor-like serine/threonine-protein kinase At3g47570; K13420 LRR receptor-like serine/threonine-protein kinase FLS2 [EC:2.7.11.1]	PRGWK00000233	MELO3C017541	Contributed_R-Genes	Cucumis melo	RLP	--	8.12e-163	1
XP_008363824.1-D19	scaffold6516	11945	14028	+	Legume lectin domain;Protein kinase domain	L-type lectin-domain containing receptor kinase IV.1-like; K04730 interleukin-1 receptor-associated kinase 1 [EC:2.7.11.1]	PRGWK00000588	Solyc03g112310.1.1	Contributed_R-Genes	Solanum lycopersicum	RLK	--	0	1
XP_008365913.1-D14	scaffold6500	191297	194617	+	Protein kinase domain	POPTRDRAFT_825852; hypothetical protein; K10527 enoyl-CoA hydratase/3-hydroxyacyl-CoA dehydrogenase [EC:4.2.1.17 1.1.1.35 1.1.1.211]	PRGDB00069440	Gma.58475	Putative_R-Genes,_predicted_from_NCBI_UniGene	Glycine max	RLK-GNK2	Glycine max clone cw104 protein kinase family protein mRNA, complete cds	4.33e-24	1
XP_004489462.1-D118	scaffold65	528694	531123	-	Protein tyrosine kinase	probable receptor protein kinase TMK1; K00924	PRGDB00161628	Glyma11g18310.1	Putative_R-Genes,_predicted_from_Pythozome	Glycine max	RLP	Leucine-rich repeat protein kinase family protein (best arabidopsis hit)	0	1
XP_004513853.1-D11	scaffold6466	18168	20234	+	Integrase core domain;Reverse transcriptase (RNA-dependent DNA polymerase)	uncharacterized LOC103707976; K01191 alpha-mannosidase [EC:3.2.1.24]	PRGDB00061511	disease resistance protein	Putative_R-Genes,_collected_from_NCBI_Protein	Brassica rapa subsp. pekinensis	TNL	Brassica rapa subsp. pekinensis isolate BrTNL10 disease resistance protein gene, complete cds.	1.16e-31	1
XP_007135353.1-D2	scaffold6463	15060	20507	+	Leucine rich repeat;Leucine Rich Repeat;Leucine rich repeat N-terminal domain;Protein tyrosine kinase	hypothetical protein; K04730 interleukin-1 receptor-associated kinase 1 [EC:2.7.11.1]	PRGDB00192175	Mtr.4332	Putative_R-Genes,_predicted_from_NCBI_UniGene	Medicago truncatula	RLP	Medicago truncatula Protein STRUBBELIG-RECEPTOR FAMILY (MTR_8g023560) mRNA, complete cds	0	1
XP_012571341.1-D113	scaffold6444	13685	17384	-	Protein kinase domain;Universal stress protein family	hypothetical protein; K17609 nucleoredoxin [EC:1.8.1.8]	PRGWK00000178	MELO3C011467	Contributed_R-Genes	Cucumis melo	RLK	--	0	1
XP_008388467.1-D5	scaffold6421	128568	132980	-	Armadillo/beta-catenin-like repeat;Atypical Arm repeat;Importin beta binding domain	hypothetical protein; K10590 E3 ubiquitin-protein ligase TRIP12 [EC:2.3.2.26]	PRGDB00152926	orange1.1g037562m	Putative_R-Genes,_predicted_from_Pythozome	Citrus sinensis	NL	importin alpha isoform 2 (best arabidopsis hit)	0	1
XP_003544250.1-D2	scaffold6413	3268	9877	-	Ethylene-responsive protein kinase Le-CTR1;Protein tyrosine kinase;Tyrosine kinase catalytic domain signature	serine/threonine-protein kinase CTR1-like; K14510 serine/threonine-protein kinase CTR1 [EC:2.7.11.1]	PRGWK00000005	MELO3C002125	Contributed_R-Genes	Cucumis melo	RLK	--	9.72e-102	1
XP_008354068.1-D23	scaffold6400	109705	112551	-	Reverse transcriptase (RNA-dependent DNA polymerase)	60S ribosomal export protein NMD3; K07562 nonsense-mediated mRNA decay protein 3	PRGDB00186672	--	Putative_R-Genes,_collected_from_NCBI_Protein	Arachis hypogaea	NL	Arachis hypogaea clone AHF-205D04 NBS-LRR gene cluster, complete sequence.	0	1
XP_002535568.1-D2	scaffold6394	251759	252718	-	NADH-plastoquinone oxidoreductase chain 5 signature;NADH-ubiquinone oxidoreductase chain 5 signature;Proton-conducting membrane transporter	A subunit of NADH dehydrogenase; K05577 NAD(P)H-quinone oxidoreductase subunit 5 [EC:1.6.5.3]	PRGDB00182943	GSVIVT01004101001	Putative_R-Genes,_predicted_from_Pythozome	Vitis vinifera	NL	NB-ARC domain-containing disease resistance protein (best arabidopsis hit)	1.34e-31	1
NP_190723.1-D17	scaffold6374	14135	16648	+	Carbohydrate-binding protein of the ER;Protein tyrosine kinase	probable receptor-like protein kinase At5g24010; K04730 interleukin-1 receptor-associated kinase 1 [EC:2.7.11.1]	PRGWK00001072	Solyc11g072910.1.1	Contributed_R-Genes	Solanum lycopersicum	Pto-like	--	0	1
XP_007132600.1-D131	scaffold6338	213835	216234	+	D-mannose binding lectin;PAN-like domain;Protein kinase domain	G-type lectin S-receptor-like serine/threonine-protein kinase RLK1; K04733 interleukin-1 receptor-associated kinase 4 [EC:2.7.11.1]	PRGDB00188789	Gma.43044	Putative_R-Genes,_predicted_from_NCBI_UniGene	Glycine max	RLK	PREDICTED: Glycine max G-type lectin S-receptor-like serine	0	1
XP_003555426.1-D6	scaffold6335	62476	66539	-	ABC-2 type transporter;ABC transporter	ATP-binding cassette, sub-family G, member 2; K05681 ATP-binding cassette, subfamily G (WHITE), member 2	PRGDB00195359	Phvulv091028303m	Putative_R-Genes,_predicted_from_Pythozome	Phaseolus vulgaris	N	--	0	1
XP_003533119.1	scaffold6325	19526	21180	-	Protein phosphatase 2C	probable protein phosphatase 2C 13; K14803 protein phosphatase 2C homolog 2/3 [EC:3.1.3.16]	PRGDB00214649	MDP0000281431	Putative_R-Genes,_predicted_from_Pythozome	Malus x domestica	RLP	--	2.21e-57	1
XP_002532618.1-D296	scaffold6310	29071	29382	+	Leucine Rich Repeat	Leucine-rich receptor-like protein kinase family protein; K00924	PRGDB00188720	Gma.38391	Putative_R-Genes,_predicted_from_NCBI_UniGene	Glycine max	RLP	PREDICTED: Glycine max probably inactive leucine-rich repeat receptor-like protein kinase At3g28040-like (LOC100795810), mRNA	5.97e-39	1
XP_014625958.1	scaffold6306	85730	90103	-	Protein kinase domain;U-box domain	U-box domain-containing protein 33-like; K04730 interleukin-1 receptor-associated kinase 1 [EC:2.7.11.1]	PRGDB00192320	Mtr.12374	Putative_R-Genes,_predicted_from_NCBI_UniGene	Medicago truncatula	N	Medicago truncatula U-box domain-containing protein (MTR_7g077780) mRNA, complete cds	0	1
XP_007154887.1-D2	scaffold6298	13601	26304	+	Ubiquitin carboxyl-terminal hydrolase	hypothetical protein; K11855 ubiquitin carboxyl-terminal hydrolase 36/42 [EC:3.4.19.12]	PRGDB00216981	MDP0000297928	Putative_R-Genes,_predicted_from_Pythozome	Malus x domestica	RLP	--	5.14e-116	1
XP_007135931.1	scaffold6258	129466	133795	-	Variant SH3 domain	hypothetical protein; K11247 endophilin-A	PRGDB00216755	MDP0000661138	Putative_R-Genes,_predicted_from_Pythozome	Malus x domestica	T	--	2.65e-30	1
XP_007152694.1	scaffold6238	290880	299310	-	Ethylene-responsive protein kinase Le-CTR1;Protein tyrosine kinase;Tyrosine kinase catalytic domain signature	serine/threonine-protein kinase EDR1-like isoform X1; K04424 sterile alpha motif and leucine zipper containing kinase AZK [EC:2.7.11.25]	PRGWK00000005	MELO3C002125	Contributed_R-Genes	Cucumis melo	RLK	--	0	1
XP_012573611.1	scaffold6231	46208	49168	-	Leucine rich repeat;Leucine Rich Repeat;Leucine rich repeat N-terminal domain;Leucine-rich repeat signature	hypothetical protein; K13420 LRR receptor-like serine/threonine-protein kinase FLS2 [EC:2.7.11.1]	PRGWK00000007	MELO3C002280	Contributed_R-Genes	Cucumis melo	RLP	--	0	1
XP_004487366.1	scaffold6229	68908	72095	-	Formin Homology 2 Domain	hypothetical protein; K02184 formin 2	PRGDB00205338	Lus10015091	Putative_R-Genes,_predicted_from_Pythozome	Linum usitatissimum	RLK-GNK2	--	6.23e-173	1
XP_012574590.1-D16	scaffold6208	72458	76543	+	Leucine rich repeat;Leucine Rich Repeat;Leucine rich repeat N-terminal domain;Leucine-rich repeat signature;Protein tyrosine kinase	LRR receptor-like serine/threonine-protein kinase EFR; K13428 LRR receptor-like serine/threonine-protein kinase EFR [EC:2.7.11.1]	PRGDB00157555	Glyma04g40870.1	Putative_R-Genes,_predicted_from_Pythozome	Glycine max	RLP	Leucine-rich repeat protein kinase family protein (best arabidopsis hit)	0	1
XP_004508548.1-D2	scaffold6195	206039	207082	-	Triose-phosphate Transporter family	GDP-mannose transporter GONST4; K15356 GDP-mannose transporter	PRGDB00216098	MDP0000255220	Putative_R-Genes,_predicted_from_Pythozome	Malus x domestica	TNL	--	0	1
XP_002524872.1-D2	scaffold6185	155903	158844	-	-	phosphatidylserine synthase 2-like; K08730 phosphatidylserine synthase 2 [EC:2.7.8.29]	PRGDB00206302	Lus10035445	Putative_R-Genes,_predicted_from_Pythozome	Linum usitatissimum	N	--	3.51e-116	1
XP_002530072.1-D17	scaffold6165	32342	54592	+	Disease resistance protein signature;NB-ARC domain;TIR domain	Heat shock protein; K03283 heat shock 70kDa protein 1/8; K06758 L1 cell adhesion molecule like protein	PRGDB00195228	Phvulv091001547m	Putative_R-Genes,_predicted_from_Pythozome	Phaseolus vulgaris	CNL	--	0	1
NP_193602.4-D15	scaffold6155	39323	39694	+	-	hypothetical protein; K02984 small subunit ribosomal protein S3Ae	PRGDB00068078	Csi.686	Putative_R-Genes,_predicted_from_NCBI_UniGene	Citrus sinensis	RLP	CGF1004521_E02 Developing fruit flavedo at 80 DAFB Citrus sinensis cDNA clone F80DAB0001_IVF_E02 5', mRNA sequence	9.01e-55	1
XP_002519242.1	scaffold6152	103800	107930	+	Protein phosphatase 2C	probable protein phosphatase 2C 42; K01102 pyruvate dehydrogenase phosphatase [EC:3.1.3.43]	PRGDB00189838	Hv.34616	Putative_R-Genes,_predicted_from_NCBI_UniGene	Hordeum vulgare	NL	Hordeum vulgare subsp. vulgare mRNA for predicted protein, partial cds, clone: NIASHv3149K09	1.73e-132	1
NP_850755.1-D68	scaffold6141	132228	132807	+	Protein tyrosine kinase	protein kinase; K04733 interleukin-1 receptor-associated kinase 4 [EC:2.7.11.1]	PRGDB00207850	Aquca_027_00169.2	Putative_R-Genes,_predicted_from_Pythozome	Aquilegia coerulea	RLP	--	6.37e-70	1
XP_007152809.1	scaffold6137	22951	25164	-	Leucine rich repeat N-terminal domain;Proline rich extensin signature	hypothetical protein; K02984 small subunit ribosomal protein S3Ae	PRGWK00000072	MELO3C004550	Contributed_R-Genes	Cucumis melo	RLP	--	0	1
XP_002525699.1-D7	scaffold6078	36816	43126	+	Protein kinase domain	LRR receptor-like serine/threonine-protein kinase FLS2; K13420 LRR receptor-like serine/threonine-protein kinase FLS2 [EC:2.7.11.1]	PRGDB00189146	Gma.62786	Putative_R-Genes,_predicted_from_NCBI_UniGene	Glycine max	RLP	PREDICTED: Glycine max probable LRR receptor-like serine	0	1
XP_002528586.1-D2	scaffold6068	17052	30833	+	Ethylene-responsive protein kinase Le-CTR1;Protein tyrosine kinase;Tyrosine kinase catalytic domain signature	serine/threonine-protein kinase CTR1-like; K14510 serine/threonine-protein kinase CTR1 [EC:2.7.11.1]	PRGDB00206219	Lus10043428	Putative_R-Genes,_predicted_from_Pythozome	Linum usitatissimum	N	--	4.01e-121	1
NP_182223.1-D9	scaffold6048	182021	190399	+	ABC transporter;ABC transporter transmembrane region	ABC transporter B family member 19-like; K05658 ATP-binding cassette, subfamily B (MDR/TAP), member 1 [EC:3.6.3.44]	PRGDB00078803	Vvi.12916	Putative_R-Genes,_predicted_from_NCBI_UniGene	Vitis vinifera	N	PREDICTED: Vitis vinifera hypothetical protein LOC100262734 (LOC100262734), mRNA	0	1
XP_004510733.1	scaffold6025	151401	153389	-	Bacterial transferase hexapeptide (six repeats);Serine acetyltransferase, N-terminal	serine acetyltransferase 5; K00640 serine O-acetyltransferase [EC:2.3.1.30]	PRGDB00216620	MDP0000287465	Putative_R-Genes,_predicted_from_Pythozome	Malus x domestica	N	--	1.7e-29	1
XP_007160648.1	scaffold6021	194601	196508	+	Pathogenesis-related protein signature;Thaumatin family	nuclear pore complex protein Nup96 homolog; K14297 nuclear pore complex protein Nup98-Nup96	PRGDB00175861	POPTR_0004s01460.1	Putative_R-Genes,_predicted_from_Pythozome	Populus trichocarpa	Other	PR5-like receptor kinase (best arabidopsis hit)	2.44e-54	1
XP_008390338.1-D236	scaffold5984	21901	24235	-	Elongation factor P (EF-P) KOW-like domain	hypothetical protein; K02356 elongation factor P	PRGDB00164955	Glyma18g44950.1	Putative_R-Genes,_predicted_from_Pythozome	Glycine max	RLP	Leucine-rich repeat protein kinase family protein (best arabidopsis hit)	1.83e-42	1
XP_007133232.1	scaffold5972	75019	75588	+	Protein of unknown function (DUF640)	-	PRGDB00149355	clementine0.9_000252m	Putative_R-Genes,_predicted_from_Pythozome	Citrus clementina	CNL	NB-ARC domain-containing disease resistance protein (best arabidopsis hit)	2.39e-78	1
XP_007157345.1	scaffold5967	21982	35148	-	Autophagy protein Atg8 ubiquitin like;MSP (Major sperm protein) domain	autophagy-related protein 8f-like; K08341 GABA(A) receptor-associated protein	PRGDB00063167	vesicle-associated protein 1-4	Putative_R-Genes,_collected_from_NCBI_Protein	Arabidopsis thaliana	T	Arabidopsis thaliana vesicle-associated protein 1-4 (AT1G51270) mRNA, complete cds.	7.52e-58	1
NP_195341.2-D5	scaffold5941	141103	156860	+	Leucine rich repeat;Leucine rich repeat N-terminal domain;Protein kinase domain	Receptor-like protein kinase; K17422 large subunit ribosomal protein L41	PRGDB00195645	Phvulv091005654m	Putative_R-Genes,_predicted_from_Pythozome	Phaseolus vulgaris	RLP	--	0	1
XP_012574773.1-D17	scaffold5933	118802	184628	-	Leucine rich repeat;Protein kinase domain;Protein tyrosine kinase	receptor protein kinase CLAVATA1; K00924	PRGDB00161825	Glyma12g00890.1	Putative_R-Genes,_predicted_from_Pythozome	Glycine max	RLP	Leucine-rich repeat protein kinase family protein (best arabidopsis hit)	0	1
XP_006607041.1-D42	scaffold591	329172	329804	-	Reverse transcriptase (RNA-dependent DNA polymerase)	Myosin XI; K10357 myosin V	PRGDB00186672	--	Putative_R-Genes,_collected_from_NCBI_Protein	Arachis hypogaea	NL	Arachis hypogaea clone AHF-205D04 NBS-LRR gene cluster, complete sequence.	1.94e-83	1
XP_007147065.1-D2	scaffold5898	57038	57796	-	Histone-like transcription factor (CBF/NF-Y) and archaeal histone	Nuclear transcription factor Y subunit C-9; K08066 nuclear transcription factor Y, gamma	PRGDB00176268	29656.m000483	Putative_R-Genes,_predicted_from_Pythozome	Oryza barthii	Mlo-like	Seven transmembrane MLO family protein (best arabidopsis hit)	5.52e-70	1
XP_006607041.1-D52	scaffold5854	29914	30546	+	Reverse transcriptase (RNA-dependent DNA polymerase)	Myosin XI; K10357 myosin V	PRGDB00186672	--	Putative_R-Genes,_collected_from_NCBI_Protein	Arachis hypogaea	NL	Arachis hypogaea clone AHF-205D04 NBS-LRR gene cluster, complete sequence.	6.19e-83	1
XP_006592402.1	scaffold585	57569	62088	-	D-mannose binding lectin;Domain of unknown function (DUF3403);PAN-like domain;Protein tyrosine kinase;S-locus glycoprotein domain	G-type lectin S-receptor-like serine/threonine-protein kinase At4g03230; K04733 interleukin-1 receptor-associated kinase 4 [EC:2.7.11.1]	PRGDB00174688	POPTR_0017s09070.1	Putative_R-Genes,_predicted_from_Pythozome	Populus trichocarpa	RLK-GNK2	cysteine-rich RLK (RECEPTOR-like protein kinase) 10 (best arabidopsis hit)	2.38e-132	1
XP_007138872.1-D58	scaffold5828	25709	28803	-	Leucine Rich Repeat;Leucine rich repeat N-terminal domain;Protein kinase domain	hypothetical protein; K00924	PRGDB00167618	Medtr2g010510.1	Putative_R-Genes,_predicted_from_Pythozome	Medicago truncatula	RLP	Leucine-rich receptor-like protein kinase family protein (best arabidopsis hit)	0	1
XP_012570563.1-D618	scaffold5825	110914	111606	+	Reverse transcriptase (RNA-dependent DNA polymerase)	uncharacterized LOC104905624; K05658 ATP-binding cassette, subfamily B (MDR/TAP), member 1 [EC:3.6.3.44]	PRGDB00217533	Thhalv10011182m	Putative_R-Genes,_predicted_from_Pythozome	Eutrema halophilum	CN	--	2.33e-24	1
XP_004512119.1-D18	scaffold5823	104402	108318	-	Leucine rich repeat;Leucine Rich Repeat;Leucine rich repeat N-terminal domain;Protein kinase domain	Receptor-like protein kinase; K17422 large subunit ribosomal protein L41	PRGDB00157678	Glyma05g02470.1	Putative_R-Genes,_predicted_from_Pythozome	Glycine max	RLP	Leucine-rich receptor-like protein kinase family protein (best arabidopsis hit)	0	1
XP_007145487.1	scaffold5806	206460	215650	+	ABC transporter	ATP-binding cassette, sub-family G, member 2; K05681 ATP-binding cassette, subfamily G (WHITE), member 2	PRGDB00189195	Gma.64008	Putative_R-Genes,_predicted_from_NCBI_UniGene	Glycine max	N	PREDICTED: Glycine max ABC transporter G family member 24-like (LOC100783798), mRNA	0	1
XP_002530200.1-D585	scaffold5802	223524	226086	-	Leucine Rich Repeat;Thioesterase-like superfamily	SERK1; somatic embryogenesis receptor kinase; K13418 somatic embryogenesis receptor kinase 1 [EC:2.7.10.1 2.7.11.1]	PRGDB00064870	Aan.22099	Putative_R-Genes,_predicted_from_NCBI_UniGene	Artemisia annua	RLP	CAZI17476.fwd CAZI Artemisia annua normalized leaf library Artemisia annua cDNA clone CAZI17476 5', mRNA sequence	3.18e-37	1
XP_014617136.1-D176	scaffold5795	9899	11058	+	Reverse transcriptase (RNA-dependent DNA polymerase)	uncharacterized LOC104905624; K05658 ATP-binding cassette, subfamily B (MDR/TAP), member 1 [EC:3.6.3.44]	PRGDB00047409	TIR-NBS-LRR-TIR type disease resistance protein	Putative_R-Genes,_collected_from_NCBI_Protein	Populus trichocarpa	TNL	Populus trichocarpa clone 110301 TIR-NBS-LRR-TIR type disease resistance protein mRNA, partial cds.	6.89e-48	1
XP_004498638.1-D2	scaffold5777	10508	18324	-	LisH;WD domain, G-beta repeat	uncharacterized LOC100217300; K14963 COMPASS component SWD3	PRGDB00213320	MDP0000177665	Putative_R-Genes,_predicted_from_Pythozome	Malus x domestica	T	--	9.45e-140	1
XP_007141280.1	scaffold5741	35852	41492	+	Ethylene-responsive protein kinase Le-CTR1;Protein tyrosine kinase;Tyrosine kinase catalytic domain signature	serine/threonine-protein kinase CTR1; K14510 serine/threonine-protein kinase CTR1 [EC:2.7.11.1]	PRGWK00000005	MELO3C002125	Contributed_R-Genes	Cucumis melo	RLK	--	1.32e-102	1
XP_007145436.1	scaffold5738	21419	23872	-	FAD-dependent pyridine nucleotide reductase signature;Flavin-binding monooxygenase-like;Pyridine nucleotide disulphide reductase class-II signature	hypothetical protein; K11816 indole-3-pyruvate monooxygenase [EC:1.14.13.168]	PRGDB00035714	Bs3	Reference_R-Genes,_manually_curated	Capsicum annuum	Other	Capsicum annuum cultivar ECW-30R Bs3 (Bs3) gene, complete cds.	2.18e-103	1
XP_007138788.1-D17	scaffold5731	41702	89554	-	Disease resistance protein signature;NB-ARC domain;Wall-associated receptor kinase galacturonan-binding	hypothetical protein; K19613 leucine-rich repeat protein SHOC2	PRGDB00169876	Medtr8g034140.1	Putative_R-Genes,_predicted_from_Pythozome	Medicago truncatula	TNL	disease resistance protein (TIR-NBS-LRR class), putative (best arabidopsis hit)	4.92e-150	1
XP_002532495.1-D53	scaffold573	208310	212691	-	PPR repeat;PPR repeat family;Protein kinase domain	Pentatricopeptide repeat-containing protein; K17710 pentatricopeptide repeat domain-containing protein 1	PRGWK00000005	MELO3C002125	Contributed_R-Genes	Cucumis melo	RLK	--	1.3e-92	1
XP_008377334.1-D103	scaffold5700	14307	16535	+	Leucine rich repeat;Leucine rich repeat N-terminal domain;Protein tyrosine kinase	hypothetical protein; K04730 interleukin-1 receptor-associated kinase 1 [EC:2.7.11.1]	PRGDB00164990	Glyma18g48170.1	Putative_R-Genes,_predicted_from_Pythozome	Glycine max	RLP	BAK1-interacting receptor-like kinase 1 (best arabidopsis hit)	0	1
XP_002521235.1	scaffold57	158548	166486	+	Protein tyrosine kinase;Tyrosine kinase catalytic domain signature	protein kinase, putative (EC:2.7.10.2); K17535 serine/threonine-protein kinase TNNI3K [EC:2.7.11.1]	PRGDB00213874	MDP0000290680	Putative_R-Genes,_predicted_from_Pythozome	Malus x domestica	RLP	--	0	1
XP_012567754.1-D258	scaffold5673	78404	78766	-	Reverse transcriptase (RNA-dependent DNA polymerase)	uncharacterized LOC104905624; K05658 ATP-binding cassette, subfamily B (MDR/TAP), member 1 [EC:3.6.3.44]	PRGDB00188818	Gma.45040	Putative_R-Genes,_predicted_from_NCBI_UniGene	Glycine max	NL	PREDICTED: Glycine max putative disease resistance protein At4g11170-like (LOC100803552), mRNA	2.58e-34	1
XP_006582992.1-D2	scaffold5671	129161	129778	-	-	-	PRGDB00203483	Carubv10021511m	Putative_R-Genes,_predicted_from_Pythozome	Capsella rubella	RLP	--	1.38e-45	1
XP_004514153.1	scaffold5653	116608	118560	+	RNA recognition motif. (a.k.a. RRM, RBD, or RNP domain)	serine/arginine-rich splicing factor 33-like; K12900 FUS-interacting serine-arginine-rich protein 1	PRGDB00217252	MDP0000284128	Putative_R-Genes,_predicted_from_Pythozome	Malus x domestica	RLP	--	2.99e-33	1
XP_006576269.1-D2	scaffold5639	62613	78573	+	ABC-2 type transporter;ABC transporter;ABC-transporter extracellular N-terminal;Plant PDR ABC transporter associated	ppabcg30; ATP-binding cassette transporter, subfamily G, member 30, group WBC protein PpABCG30; K05681 ATP-binding cassette, subfamily G (WHITE), member 2	PRGDB00189030	Gma.60744	Putative_R-Genes,_predicted_from_NCBI_UniGene	Glycine max	N	PREDICTED: Glycine max pleiotropic drug resistance protein 1-like (LOC100813417), mRNA	0	1
XP_004512961.1	scaffold5633	129452	131683	-	Proline rich extensin signature	hypothetical protein; K02984 small subunit ribosomal protein S3Ae	PRGWK00000072	MELO3C004550	Contributed_R-Genes	Cucumis melo	RLP	--	0	1
XP_008375855.1-D186	scaffold563	16788	17561	-	-	Protein transport protein Sec24-like protein; K14007 protein transport protein SEC24	PRGDB00186672	--	Putative_R-Genes,_collected_from_NCBI_Protein	Arachis hypogaea	NL	Arachis hypogaea clone AHF-205D04 NBS-LRR gene cluster, complete sequence.	1.06e-100	1
XP_004497016.1	scaffold560	77001	85237	-	Fructose-bisphosphate aldolase class-I	hypothetical protein; K01623 fructose-bisphosphate aldolase, class I [EC:4.1.2.13]	PRGDB00206302	Lus10035445	Putative_R-Genes,_predicted_from_Pythozome	Linum usitatissimum	N	--	8.69e-116	1
XP_007149249.1-D67	scaffold5598	121367	141318	+	Leucine rich repeat;Leucine Rich Repeat;Leucine rich repeat N-terminal domain;Protein kinase domain	brassinosteroid LRR receptor kinase; K13415 protein brassinosteroid insensitive 1 [EC:2.7.10.1 2.7.11.1]	PRGDB00196245	Phvulv091028639m	Putative_R-Genes,_predicted_from_Pythozome	Phaseolus vulgaris	RLP	--	0	1
XP_002509777.1-D3	scaffold5592	25546	27430	-	Leucine Rich Repeat;Protein tyrosine kinase	hypothetical protein; K04733 interleukin-1 receptor-associated kinase 4 [EC:2.7.11.1]	PRGDB00195500	Phvulv091008575m	Putative_R-Genes,_predicted_from_Pythozome	Phaseolus vulgaris	RLP	--	0	1
XP_008375855.1-D17	scaffold5545	24147	24995	-	Endonuclease/Exonuclease/phosphatase family	Protein transport protein Sec24-like protein; K14007 protein transport protein SEC24	PRGDB00186672	--	Putative_R-Genes,_collected_from_NCBI_Protein	Arachis hypogaea	NL	Arachis hypogaea clone AHF-205D04 NBS-LRR gene cluster, complete sequence.	1.87e-149	1
XP_007136190.1	scaffold5532	500993	505885	-	Protein kinase domain	mitogen-activated protein kinase kinase kinase 1-like; K13414 mitogen-activated protein kinase kinase kinase 1, plant [EC:2.7.11.25]	PRGDB00203590	Carubv10000510m	Putative_R-Genes,_predicted_from_Pythozome	Capsella rubella	Other	--	7.89e-121	1
XP_004493999.2-D2	scaffold5529	285040	287491	-	70kDa heat shock protein signature;Hsp70 protein	heat shock cognate 70 kDa protein-like; K03283 heat shock 70kDa protein 1/8; K06758 L1 cell adhesion molecule like protein	PRGDB00167710	Medtr2g047020.1	Putative_R-Genes,_predicted_from_Pythozome	Medicago truncatula	TNL	heat shock cognate protein 70-1 (best arabidopsis hit)	0	1
XP_002525400.1	scaffold5524	208731	212047	-	Leucine rich repeat N-terminal domain;Protein kinase domain	hypothetical protein; K13418 somatic embryogenesis receptor kinase 1 [EC:2.7.10.1 2.7.11.1]	PRGDB00155878	Glyma02g04150.1	Putative_R-Genes,_predicted_from_Pythozome	Glycine max	RLP	NSP-interacting kinase 3 (best arabidopsis hit)	0	1
XP_003546757.2-D6	scaffold5520	76275	80992	+	Disease resistance protein signature;NB-ARC domain	disease resistance protein RPS2-like; K13459 disease resistance protein RPS2	PRGDB00167805	Medtr3g005310.1	Putative_R-Genes,_predicted_from_Pythozome	Medicago truncatula	CNL	NB-ARC domain-containing disease resistance protein (best arabidopsis hit)	0	1
XP_008372863.1-D2	scaffold5502	39650	43665	+	Apoptosis antagonizing transcription factor	hypothetical protein; K14782 protein AATF/BFR2	PRGDB00158505	Glyma06g19620.1	Putative_R-Genes,_predicted_from_Pythozome	Glycine max	RLP	Leucine-rich repeat protein kinase family protein (best arabidopsis hit)	4.22e-29	1
XP_003518009.1	scaffold5482	41781	52564	-	Carbohydrate-binding protein of the ER	hypothetical protein; K16224 senescence-induced receptor-like serine/threonine-protein kinase	PRGWK00000726	Solyc05g009800.1.1	Contributed_R-Genes	Solanum lycopersicum	RLP-Malectin	--	0	1
XP_006607041.1-D14	scaffold5477	33566	34198	-	Reverse transcriptase (RNA-dependent DNA polymerase)	Myosin XI; K10357 myosin V	PRGDB00186672	--	Putative_R-Genes,_collected_from_NCBI_Protein	Arachis hypogaea	NL	Arachis hypogaea clone AHF-205D04 NBS-LRR gene cluster, complete sequence.	6.19e-83	1
XP_006598570.1-D472	scaffold5472	148438	148770	+	-	hypothetical protein; K06228 fused [EC:2.7.11.1]	PRGDB00217533	Thhalv10011182m	Putative_R-Genes,_predicted_from_Pythozome	Eutrema halophilum	CN	--	3.19e-43	1
XP_002530676.1-D32	scaffold5469	26817	45153	+	Protein kinase domain	Serine/threonine-protein kinase SAPK3 isoform 1; K14498 serine/threonine-protein kinase SRK2 [EC:2.7.11.1]	PRGDB00189827	Hv.34453	Putative_R-Genes,_predicted_from_NCBI_UniGene	Hordeum vulgare	NL	Hordeum vulgare subsp. vulgare mRNA for predicted protein, complete cds, clone: NIASHv2106K13	5.61e-22	1
XP_004486660.1	scaffold5465	31466	33768	-	Protein tyrosine kinase	PTI1-like tyrosine-protein kinase At3g15890; K04733 interleukin-1 receptor-associated kinase 4 [EC:2.7.11.1]	PRGDB00064120	Zm.28649	Putative_R-Genes,_predicted_from_NCBI_UniGene	Zea mays	RLK	Zea mays full-length cDNA clone ZM_BFb0232B17 mRNA, complete cds	0	1
XP_014626324.1-D2	scaffold5454	78598	90254	+	Clathrin, heavy-chain linker;Clathrin-H-link;Clathrin propeller repeat;Region in Clathrin and VPS	clathrin heavy chain 2-like; K04646 clathrin heavy chain	PRGDB00147219	Bradi4g25570.1	Putative_R-Genes,_predicted_from_Pythozome	Ricinus communis	CN	Clathrin, heavy chain (best arabidopsis hit); clathrin heavy chain, putative, expressed (best rice hit)	0	1
XP_012569150.1-D2	scaffold5449	99842	104168	+	Putative S-adenosyl-L-methionine-dependent methyltransferase	probable methyltransferase PMT28; K16302 metal transporter CNNM	PRGDB00184933	GRMZM2G431021_T01	Putative_R-Genes,_predicted_from_Pythozome	Zea mays	RLK-GNK2	cysteine-rich RLK (RECEPTOR-like protein kinase) 10 (best arabidopsis hit); TKL_IRAK_DUF26-lc.12 - DUF26 kinases have homology to DUF26 containing loci, expressed (best rice hit)	4.18e-58	1
XP_008368361.1-D155	scaffold5439	25669	27941	+	Leucine rich repeat;Leucine Rich Repeat;Leucine-rich repeat signature;Protein kinase domain	Leucine-rich repeat protein kinase family protein; K13420 LRR receptor-like serine/threonine-protein kinase FLS2 [EC:2.7.11.1]	PRGDB00157882	Glyma05g25640.1	Putative_R-Genes,_predicted_from_Pythozome	Glycine max	RLP	Leucine-rich repeat protein kinase family protein (best arabidopsis hit)	0	1
XP_012568577.1-D2	scaffold5423	112618	117176	+	UreF	hypothetical protein; K03188 urease accessory protein	PRGDB00215028	MDP0000183137	Putative_R-Genes,_predicted_from_Pythozome	Malus x domestica	TNL	--	8.26e-37	1
XP_006589174.1	scaffold5406	61341	97150	-	C-terminal region of Mon2 protein;Dimerisation and cyclophilin-binding domain of Mon2;Domain of unknown function (DUF1981);Guanine nucleotide exchange factor in Golgi transport N-terminal	hypothetical protein; K13462 guanine nucleotide-exchange factor	PRGDB00205746	Lus10004115	Putative_R-Genes,_predicted_from_Pythozome	Linum usitatissimum	TNL	--	0	1
XP_014627745.1	scaffold5404	580293	582110	-	Leucine rich repeat;Leucine rich repeat N-terminal domain	BRASSINOSTEROID INSENSITIVE 1-associated receptor kinase 1; K13416 brassinosteroid insensitive 1-associated receptor kinase 1 [EC:2.7.10.1 2.7.11.1]	PRGDB00081239	Qro.2478	Putative_R-Genes,_predicted_from_NCBI_UniGene	Cucumis sativus	RLP	FN704271 WZOAQRAR Quercus robur cDNA clone WZ0AQRAR7YO18NM1, mRNA sequence	3.24e-121	1
XP_002527226.1-D12	scaffold540	295311	296167	-	Serine hydroxymethyltransferase	serine hydroxymethyltransferase, putative (EC:2.1.2.1); K00600 glycine hydroxymethyltransferase [EC:2.1.2.1]	PRGDB00214085	MDP0000194411	Putative_R-Genes,_predicted_from_Pythozome	Malus x domestica	N	--	1.1e-52	1
XP_003551713.1-D2	scaffold5337	106707	109426	+	Protein kinase domain	protein kinase G11A-like; K08286 protein-serine/threonine kinase [EC:2.7.11.-]	PRGDB00216033	MDP0000314577	Putative_R-Genes,_predicted_from_Pythozome	Malus x domestica	RLP	--	2.37e-77	1
XP_003535370.1	scaffold533	8449	13809	-	Carbohydrate-binding protein of the ER;Protein tyrosine kinase	hypothetical protein; K04733 interleukin-1 receptor-associated kinase 4 [EC:2.7.11.1]	PRGWK00000419	Solyc01g059910.1.1	Contributed_R-Genes	Solanum lycopersicum	Pto-like	--	0	1
XP_004500957.1-D137	scaffold5318	37562	39810	-	Leucine Rich Repeat;Leucine rich repeat N-terminal domain;Protein kinase domain	hypothetical protein; K00924	PRGDB00188504	Gma.22164	Putative_R-Genes,_predicted_from_NCBI_UniGene	Glycine max	RLP	PREDICTED: Glycine max probable inactive leucine-rich repeat receptor-like protein kinase At1g66830-like (LOC100792873), mRNA	0	1
XP_006604033.1	scaffold5285	95424	98216	+	Protein kinase domain	protein kinase G11A-like; K08286 protein-serine/threonine kinase [EC:2.7.11.-]	PRGDB00216033	MDP0000314577	Putative_R-Genes,_predicted_from_Pythozome	Malus x domestica	RLP	--	3.05e-91	1
XP_008372806.1	scaffold5282	492069	510734	-	Inorganic H+ pyrophosphatase;Prephenate dehydrogenase	pyrophosphate-energized vacuolar membrane proton pump-like; K01507 inorganic pyrophosphatase [EC:3.6.1.1]	PRGDB00184313	GSVIVT01034326001	Putative_R-Genes,_predicted_from_Pythozome	Vitis vinifera	RLK-GNK2	cysteine-rich RLK (RECEPTOR-like protein kinase) 10 (best arabidopsis hit)	1.02e-38	1
XP_004505555.1	scaffold5261	182775	183485	+	AP2 domain;Ethylene responsive element binding protein signature	hypothetical protein; K09286 EREBP-like factor	PRGDB00070731	Mdo.689	Putative_R-Genes,_predicted_from_NCBI_UniGene	Malus x domestica	T	Malus x domestica AP2 domain class transcription factor (AP2D43) mRNA, complete cds	3.72e-30	1
XP_007145094.1-D2	scaffold5257	185977	189322	-	SecA Wing and Scaffold domain	hypothetical protein; K03070 preprotein translocase subunit SecA	PRGDB00067618	Bol.25109	Putative_R-Genes,_predicted_from_NCBI_UniGene	Brassica oleracea	RLP	DK463848 full-length kale cDNA library (capsules) Brassica oleracea var. acephala cDNA clone KALE-021L09 5', mRNA sequence	4.11e-34	1
XP_006576670.1-D12	scaffold5254	266	1882	+	N-terminal domain of oxidoreductase;Zinc-binding dehydrogenase	2-alkenal reductase (NADP(+)-dependent)-like; K07119 uncharacterized protein	PRGDB00078525	Vvi.774	Putative_R-Genes,_predicted_from_NCBI_UniGene	Vitis vinifera	RLP	PREDICTED: Vitis vinifera hypothetical protein LOC100251471 (LOC100251471), mRNA	7.65e-82	1
XP_014632694.1	scaffold5249	124270	124989	+	Pathogenesis-related protein signature;Thaumatin family	nuclear pore complex protein Nup96 homolog; K14297 nuclear pore complex protein Nup98-Nup96	PRGDB00202605	Carubv10019327m	Putative_R-Genes,_predicted_from_Pythozome	Capsella rubella	Other	--	3.97e-96	1
XP_003532185.1	scaffold5240	39475	42849	-	RNA polymerase Rpb3/Rpb11 dimerisation domain;RNA polymerase Rpb3/RpoA insert domain	DNA-directed RNA polymerases I and III subunit RPAC1-like; K03027 DNA-directed RNA polymerases I and III subunit RPAC1	PRGDB00215326	MDP0000285649	Putative_R-Genes,_predicted_from_Pythozome	Malus x domestica	NL	--	2.01e-151	1
XP_003532308.2	scaffold5215	32814	37254	+	Leucine rich repeat;Leucine Rich Repeat;Leucine rich repeat N-terminal domain;Leucine-rich repeat signature;Protein kinase domain	Receptor-like protein kinase; K17422 large subunit ribosomal protein L41	PRGDB00195795	Phvulv091028470m	Putative_R-Genes,_predicted_from_Pythozome	Phaseolus vulgaris	RLP	--	0	1
XP_004502339.1-D3	scaffold5209	122143	131642	-	Carbohydrate-binding protein of the ER;Protein tyrosine kinase	hypothetical protein; K04730 interleukin-1 receptor-associated kinase 1 [EC:2.7.11.1]	PRGDB00188710	Gma.37772	Putative_R-Genes,_predicted_from_NCBI_UniGene	Glycine max	RLP	PREDICTED: Glycine max probable LRR receptor-like serine	0	1
XP_003527824.1	scaffold5197	155271	161561	-	Protein kinase domain	proline-rich receptor-like protein kinase PERK1-like; K04730 interleukin-1 receptor-associated kinase 1 [EC:2.7.11.1]	PRGDB00217566	Thhalv10011979m	Putative_R-Genes,_predicted_from_Pythozome	Eutrema halophilum	RLP	--	1.19e-121	1
XP_007135830.1-D2	scaffold5191	173823	179516	+	Domain of unknown function (DUF1995);Translation initiation factor IF-3, C-terminal domain;Translation initiation factor IF-3, N-terminal domain	uncharacterized LOC101501802; K02520 translation initiation factor IF-3	PRGDB00065930	At.11684	Putative_R-Genes,_predicted_from_NCBI_UniGene	Arabidopsis thaliana	RLP	Arabidopsis thaliana At1g73070 mRNA for unknown protein, complete cds, clone: RAFL16-96-P09	8.42e-95	1
XP_007140129.1-D145	scaffold5186	24305	26620	+	Leucine Rich Repeat;Protein kinase domain	Os01g0819100; Similar to predicted protein.; K04733 interleukin-1 receptor-associated kinase 4 [EC:2.7.11.1]	PRGDB00184277	GSVIVT01033749001	Putative_R-Genes,_predicted_from_Pythozome	Vitis vinifera	RLP	Leucine-rich repeat protein kinase family protein (best arabidopsis hit)	0	1
XP_008390839.1-D4	scaffold5161	189294	190016	-	Histone-like transcription factor (CBF/NF-Y) and archaeal histone	nuclear transcription factor Y subunit C-2-like; K08066 nuclear transcription factor Y, gamma	PRGDB00176268	29656.m000483	Putative_R-Genes,_predicted_from_Pythozome	Oryza barthii	Mlo-like	Seven transmembrane MLO family protein (best arabidopsis hit)	1.75e-48	1
XP_002524514.1	scaffold5120	122055	129070	+	Di-glucose binding within endoplasmic reticulum;Protein tyrosine kinase	hypothetical protein; K04733 interleukin-1 receptor-associated kinase 4 [EC:2.7.11.1]	PRGDB00162237	Glyma12g36190.1	Putative_R-Genes,_predicted_from_Pythozome	Glycine max	RLP	Leucine-rich repeat transmembrane protein kinase (best arabidopsis hit)	0	1
XP_008363615.1-D2	scaffold5108	114760	115401	+	AP2 domain;Ethylene responsive element binding protein signature	ATERF-4/ATERF4/ERF4/RAP2.5; K09286 EREBP-like factor	PRGDB00070731	Mdo.689	Putative_R-Genes,_predicted_from_NCBI_UniGene	Malus x domestica	T	Malus x domestica AP2 domain class transcription factor (AP2D43) mRNA, complete cds	1.95e-32	1
XP_014621185.1	scaffold5101	151835	153687	+	Seven in absentia protein family	E3 ubiquitin-protein ligase SINAT5-like; K04506 E3 ubiquitin-protein ligase SIAH1 [EC:2.3.2.27]	PRGWK00001141	Solyc12g100010.1.1	Contributed_R-Genes	Solanum lycopersicum	RLP	--	9.38e-30	1
XP_012570563.1-D32	scaffold5084	265906	267497	-	Reverse transcriptase (RNA-dependent DNA polymerase)	uncharacterized LOC104905624; K05658 ATP-binding cassette, subfamily B (MDR/TAP), member 1 [EC:3.6.3.44]	PRGDB00047409	TIR-NBS-LRR-TIR type disease resistance protein	Putative_R-Genes,_collected_from_NCBI_Protein	Populus trichocarpa	TNL	Populus trichocarpa clone 110301 TIR-NBS-LRR-TIR type disease resistance protein mRNA, partial cds.	1.14e-44	1
XP_004491018.1	scaffold5077	116768	120226	+	Leucine rich repeat N-terminal domain;Protein tyrosine kinase	probable inactive receptor-like protein kinase At3g56050; K04733 interleukin-1 receptor-associated kinase 4 [EC:2.7.11.1]	PRGDB00196095	Phvulv091021786m	Putative_R-Genes,_predicted_from_Pythozome	Phaseolus vulgaris	RLP	--	0	1
NP_195650.1-D2	scaffold5067	164099	167680	-	Leucine rich repeat;Leucine Rich Repeat;Leucine rich repeat N-terminal domain;Leucine-rich repeat signature;Protein kinase domain	systemin receptor SR160-like; K13415 protein brassinosteroid insensitive 1 [EC:2.7.10.1 2.7.11.1]	PRGDB00188955	Gma.58244	Putative_R-Genes,_predicted_from_NCBI_UniGene	Glycine max	RLP	PREDICTED: Glycine max brassinosteroid LRR receptor kinase-like (LOC100799772), mRNA	0	1
XP_007157884.1-D5	scaffold5013	6067	6519	+	Skp1 family, dimerisation domain;Skp1 family, tetramerisation domain	SKP1-like protein 1A; K03094 S-phase kinase-associated protein 1	PRGDB00215380	MDP0000255887	Putative_R-Genes,_predicted_from_Pythozome	Malus x domestica	TNL	--	1.69e-56	1
XP_014621691.1-D6	scaffold4998	98408	101236	+	ABC-2 type transporter;ABC transporter	hypothetical protein; K05681 ATP-binding cassette, subfamily G (WHITE), member 2	PRGDB00162362	Glyma13g07990.1	Putative_R-Genes,_predicted_from_Pythozome	Glycine max	N	white-brown complex homolog protein 11 (best arabidopsis hit)	0	1
XP_008390015.1-D80	scaffold4987	93308	97980	+	gag-polypeptide of LTR copia-type;Reverse transcriptase (RNA-dependent DNA polymerase)	uncharacterized LOC104905624; K05658 ATP-binding cassette, subfamily B (MDR/TAP), member 1 [EC:3.6.3.44]	PRGDB00217533	Thhalv10011182m	Putative_R-Genes,_predicted_from_Pythozome	Eutrema halophilum	CN	--	7.23e-34	1
XP_006607041.1-D69	scaffold4974	68979	69611	-	Reverse transcriptase (RNA-dependent DNA polymerase)	Myosin XI; K10357 myosin V	PRGDB00186672	--	Putative_R-Genes,_collected_from_NCBI_Protein	Arachis hypogaea	NL	Arachis hypogaea clone AHF-205D04 NBS-LRR gene cluster, complete sequence.	3.6e-82	1
XP_012574690.1-D5	scaffold4962	1321	1788	+	Protein tyrosine kinase	hypothetical protein; K04424 sterile alpha motif and leucine zipper containing kinase AZK [EC:2.7.11.25]	PRGWK00000005	MELO3C002125	Contributed_R-Genes	Cucumis melo	RLK	--	1.51e-40	1
XP_012570114.1-D4	scaffold4947	314606	320131	-	-	hypothetical protein; K02984 small subunit ribosomal protein S3Ae	PRGWK00000100	MELO3C006506	Contributed_R-Genes	Cucumis melo	RLP	--	2.22e-121	1
XP_003536896.1	scaffold4945	212118	213916	-	Leucine rich repeat N-terminal domain	LRR receptor-like serine/threonine-protein kinase FLS2; K13420 LRR receptor-like serine/threonine-protein kinase FLS2 [EC:2.7.11.1]	PRGWK00000199	MELO3C014415	Contributed_R-Genes	Cucumis melo	RLP	--	0	1
XP_003550129.1	scaffold4924	90953	94379	+	1-deoxy-D-xylulose-5-phosphate synthase;Transketolase, C-terminal domain;Transketolase, pyrimidine binding domain	probable 1-deoxy-D-xylulose-5-phosphate synthase, chloroplastic; K01662 1-deoxy-D-xylulose-5-phosphate synthase [EC:2.2.1.7]	PRGDB00067001	At.66955	Putative_R-Genes,_predicted_from_NCBI_UniGene	Arabidopsis thaliana	RPW8-NL	Arabidopsis thaliana mRNA for ADR1, complete cds, clone: RAFL15-45-C23	9.74e-156	1
XP_002521903.1-D13	scaffold4915	71106	74909	-	Leucine rich repeat;Leucine rich repeat N-terminal domain;Protein kinase domain	Receptor-like protein kinase; K17422 large subunit ribosomal protein L41	PRGDB00167539	Medtr1g093120.1	Putative_R-Genes,_predicted_from_Pythozome	Medicago truncatula	RLP	Leucine-rich repeat protein kinase family protein (best arabidopsis hit)	0	1
XP_006592356.1-D19	scaffold491	8549	9508	+	Leucine rich repeat N-terminal domain	probable receptor protein kinase TMK1; K00924	PRGDB00216697	MDP0000258495	Putative_R-Genes,_predicted_from_Pythozome	Malus x domestica	RLP	--	1.69e-67	1
XP_012568090.1-D16	scaffold4905	66006	99693	+	Disease resistance protein signature;Leucine rich repeat;Leucine Rich Repeat;NB-ARC domain;Reverse transcriptase (RNA-dependent DNA polymerase);TIR domain	Heat shock protein; K03283 heat shock 70kDa protein 1/8; K06758 L1 cell adhesion molecule like protein	PRGDB00047409	TIR-NBS-LRR-TIR type disease resistance protein	Putative_R-Genes,_collected_from_NCBI_Protein	Populus trichocarpa	TNL	Populus trichocarpa clone 110301 TIR-NBS-LRR-TIR type disease resistance protein mRNA, partial cds.	3.29e-72	1
NP_192232.5-D34	scaffold4842	210349	211320	-	Protein tyrosine kinase	G-type lectin S-receptor-like serine/threonine-protein kinase At1g11330; K04733 interleukin-1 receptor-associated kinase 4 [EC:2.7.11.1]	PRGDB00066505	At.42140	Putative_R-Genes,_predicted_from_NCBI_UniGene	Arabidopsis thaliana	RLK	Arabidopsis thaliana S-locus lectin protein kinase family protein (AT1G11330) mRNA, complete cds	1.17e-105	1
NP_180259.1-D2	scaffold4800	110985	122735	-	ABC-2 type transporter;ABC transporter;ABC-transporter extracellular N-terminal;Plant PDR ABC transporter associated	ppabcg30; ATP-binding cassette transporter, subfamily G, member 30, group WBC protein PpABCG30; K05681 ATP-binding cassette, subfamily G (WHITE), member 2	PRGDB00196337	Phvulv091016142m	Putative_R-Genes,_predicted_from_Pythozome	Phaseolus vulgaris	N	--	0	1
XP_007145032.1-D2	scaffold4792	23707	27783	-	Protein kinase domain	hypothetical protein; K03083 glycogen synthase kinase 3 beta [EC:2.7.11.26]	PRGDB00215771	MDP0000180284	Putative_R-Genes,_predicted_from_Pythozome	Malus x domestica	RLP	--	0	1
XP_004502650.1-D4	scaffold4778	61243	63973	+	Seven in absentia protein family	E3 ubiquitin-protein ligase SINAT3-like; K04506 E3 ubiquitin-protein ligase SIAH1 [EC:2.3.2.27]	PRGWK00001141	Solyc12g100010.1.1	Contributed_R-Genes	Solanum lycopersicum	RLP	--	3.46e-28	1
XP_004492826.1-D301	scaffold4776	74632	75129	+	Leucine rich repeat	hypothetical protein; K13420 LRR receptor-like serine/threonine-protein kinase FLS2 [EC:2.7.11.1]	PRGDB00188720	Gma.38391	Putative_R-Genes,_predicted_from_NCBI_UniGene	Glycine max	RLP	PREDICTED: Glycine max probably inactive leucine-rich repeat receptor-like protein kinase At3g28040-like (LOC100795810), mRNA	7.98e-55	1
XP_008375855.1-D141	scaffold4771	33731	34566	+	Endonuclease/Exonuclease/phosphatase family	Protein transport protein Sec24-like protein; K14007 protein transport protein SEC24	PRGDB00186672	--	Putative_R-Genes,_collected_from_NCBI_Protein	Arachis hypogaea	NL	Arachis hypogaea clone AHF-205D04 NBS-LRR gene cluster, complete sequence.	1.72e-141	1
XP_014617136.1-D77	scaffold4767	1143	2270	+	Reverse transcriptase (RNA-dependent DNA polymerase)	uncharacterized LOC100245431; K05387 glutamate receptor, ionotropic, plant	PRGDB00206816	LOC_Os10g21950.1	Putative_R-Genes,_predicted_from_Pythozome	Oryza sativa	NL	--	8.54e-62	1
XP_004508670.1	scaffold4747	60364	74961	-	F-box associated;F-box domain;OB-fold nucleic acid binding domain;Replication factor-A C terminal domain;Replication factor-A protein 1, N-terminal domain;Replication protein A OB domain	hypothetical protein; K07466 replication factor A1	PRGDB00205274	Lus10003268	Putative_R-Genes,_predicted_from_Pythozome	Linum usitatissimum	T	--	2.14e-50	1
XP_002520400.1-D4	scaffold4732	273104	274415	-	PPP5 TPR repeat region	protein phosphatase-5, putative (EC:3.1.3.16); K04460 serine/threonine-protein phosphatase 5 [EC:3.1.3.16]	PRGDB00215267	MDP0000256952	Putative_R-Genes,_predicted_from_Pythozome	Malus x domestica	RLP	--	5.42e-34	1
XP_002533302.1	scaffold4731	46920	48212	+	Leucine rich repeat	hypothetical protein; K13420 LRR receptor-like serine/threonine-protein kinase FLS2 [EC:2.7.11.1]	PRGWK00000233	MELO3C017541	Contributed_R-Genes	Cucumis melo	RLP	--	0	1
NP_201198.1-D92	scaffold4729	201882	205355	-	Leucine rich repeat;Leucine Rich Repeat;Leucine rich repeat N-terminal domain;Leucine-rich repeat signature;Protein kinase domain	CLV1; receptor protein kinase CLAVATA1; K00924	PRGDB00188878	Gma.50655	Putative_R-Genes,_predicted_from_NCBI_UniGene	Glycine max	RLP	PREDICTED: Glycine max probably inactive leucine-rich repeat receptor-like protein kinase At2g25790-like (LOC100776180), mRNA	0	1
XP_002530672.1-D2	scaffold4681	90880	92717	-	Mlo family	MLO-like protein 4; K08472 mlo protein	PRGDB00192167	Mtr.3114	Putative_R-Genes,_predicted_from_NCBI_UniGene	Medicago truncatula	Mlo-like	Medicago truncatula MLO-like protein (MTR_2g006280) mRNA, complete cds	2.15e-125	1
XP_002521164.1-D2	scaffold4645	308993	310594	+	FAD-dependent pyridine nucleotide reductase signature;Flavin-binding monooxygenase-like;Pyridine nucleotide disulphide reductase class-II signature	probable indole-3-pyruvate monooxygenase YUCCA5; K11816 indole-3-pyruvate monooxygenase [EC:1.14.13.168]	PRGDB00035714	Bs3	Reference_R-Genes,_manually_curated	Capsicum annuum	Other	Capsicum annuum cultivar ECW-30R Bs3 (Bs3) gene, complete cds.	3.6e-96	1
XP_014619496.1	scaffold4629	103272	106636	+	Putative S-adenosyl-L-methionine-dependent methyltransferase	probable methyltransferase PMT28; K16302 metal transporter CNNM	PRGDB00192055	Lsa.52737	Putative_R-Genes,_predicted_from_NCBI_UniGene	Lactuca sativa	NL	TSA: Lactuca sativa CLC_LTR_V1A_40077 mRNA sequence	1e-24	1
XP_002513563.1-D130	scaffold46	258737	259036	+	Protein tyrosine kinase	probable receptor-like protein kinase At1g67000; K04730 interleukin-1 receptor-associated kinase 1 [EC:2.7.11.1]	PRGDB00169616	Medtr7g093320.1	Putative_R-Genes,_predicted_from_Pythozome	Medicago truncatula	RLP	Leucine-rich repeat protein kinase family protein (best arabidopsis hit)	7.67e-40	1
XP_004500676.1-D2	scaffold4591	22643	26096	-	-	phospholipid-transporting ATPase 2-like; K01530 phospholipid-translocating ATPase [EC:3.6.3.1]	PRGWK00001761	Sotub06g009190.1.1	Contributed_R-Genes	Solanum tuberosum	RLK	--	3.17e-25	1
XP_004508778.1	scaffold4587	154742	158517	+	Leucine rich repeat N-terminal domain;Protein kinase domain	hypothetical protein; K04730 interleukin-1 receptor-associated kinase 1 [EC:2.7.11.1]	PRGDB00188919	Gma.53384	Putative_R-Genes,_predicted_from_NCBI_UniGene	Glycine max	RLP	PREDICTED: Glycine max LRR receptor-like serine	0	1
XP_008346242.1-D12	scaffold4580	189996	190361	+	-	hypothetical protein; K04733 interleukin-1 receptor-associated kinase 4 [EC:2.7.11.1]	PRGWK00000212	MELO3C015475	Contributed_R-Genes	Cucumis melo	RLK	--	5.9e-43	1
XP_012567754.1-D156	scaffold4575	321196	321996	-	Reverse transcriptase (RNA-dependent DNA polymerase)	probable inactive beta-glucosidase 33; K01188 beta-glucosidase [EC:3.2.1.21]	PRGDB00206816	LOC_Os10g21950.1	Putative_R-Genes,_predicted_from_Pythozome	Oryza sativa	NL	--	6.68e-28	1
XP_006577006.1	scaffold4545	273069	279111	-	Carbohydrate-binding protein of the ER;Protein tyrosine kinase	hypothetical protein; K16224 senescence-induced receptor-like serine/threonine-protein kinase	PRGDB00189062	Gma.61319	Putative_R-Genes,_predicted_from_NCBI_UniGene	Glycine max	RLP	PREDICTED: Glycine max probable LRR receptor-like serine	0	1
XP_014621573.1-D49	scaffold4531	23382	24455	+	Hsp70 protein	heat shock cognate 70 kDa protein 2-like; K03283 heat shock 70kDa protein 1/8; K06758 L1 cell adhesion molecule like protein	PRGDB00167710	Medtr2g047020.1	Putative_R-Genes,_predicted_from_Pythozome	Medicago truncatula	TNL	heat shock cognate protein 70-1 (best arabidopsis hit)	1.95e-46	1
XP_008366930.1-D220	scaffold4474	45217	46114	+	-	SERK2a-2; hypothetical protein; K13418 somatic embryogenesis receptor kinase 1 [EC:2.7.10.1 2.7.11.1]	PRGDB00188398	Gma.16701	Putative_R-Genes,_predicted_from_NCBI_UniGene	Glycine max	RLP	PREDICTED: Glycine max probable leucine-rich repeat receptor-like protein kinase At5g49770-like (LOC100811702), mRNA	2.85e-56	1
XP_008375855.1-D105	scaffold4467	111326	112126	-	Endonuclease/Exonuclease/phosphatase family	Protein transport protein Sec24-like protein; K14007 protein transport protein SEC24	PRGDB00186672	--	Putative_R-Genes,_collected_from_NCBI_Protein	Arachis hypogaea	NL	Arachis hypogaea clone AHF-205D04 NBS-LRR gene cluster, complete sequence.	5.52e-120	1
XP_002516674.1-D2	scaffold4466	126156	129417	+	Seven in absentia protein family	Ubiquitin ligase SINAT3; K04506 E3 ubiquitin-protein ligase SIAH1 [EC:2.3.2.27]	PRGWK00001141	Solyc12g100010.1.1	Contributed_R-Genes	Solanum lycopersicum	RLP	--	1.71e-28	1
XP_007159301.1	scaffold446	32918	34653	-	alpha/beta hydrolase fold;Alpha/beta hydrolase fold signature;Epoxide hydrolase signature	hypothetical protein; K08726 soluble epoxide hydrolase / lipid-phosphate phosphatase [EC:3.3.2.10 3.1.3.76]	PRGDB00213322	MDP0000279719	Putative_R-Genes,_predicted_from_Pythozome	Malus x domestica	NL	--	6.91e-148	1
XP_004505555.1-D2	scaffold4445	5214	5867	-	AP2 domain;Ethylene responsive element binding protein signature	ethylene response factor 2; K09286 EREBP-like factor	PRGDB00070731	Mdo.689	Putative_R-Genes,_predicted_from_NCBI_UniGene	Malus x domestica	T	Malus x domestica AP2 domain class transcription factor (AP2D43) mRNA, complete cds	3.14e-31	1
XP_004495090.1-D6	scaffold4438	161988	191839	-	Protein of unknown function (DUF640)	-	PRGDB00155469	orange1.1g000354m	Putative_R-Genes,_predicted_from_Pythozome	Citrus sinensis	CNL	NB-ARC domain-containing disease resistance protein (best arabidopsis hit)	4.92e-47	1
XP_002528331.1-D49	scaffold4436	355827	357130	-	Leucine rich repeat N-terminal domain;Zinc-binding dehydrogenase	Os02g0805600; K00344 NADPH2:quinone reductase [EC:1.6.5.5]	PRGDB00188406	Gma.17922	Putative_R-Genes,_predicted_from_NCBI_UniGene	Glycine max	RLP	PREDICTED: Glycine max probably inactive leucine-rich repeat receptor-like protein kinase At3g28040-like (LOC100813764), mRNA	6.87e-29	1
XP_002522330.1-D14	scaffold4418	23198	25090	+	Protein kinase domain	hypothetical protein; K14498 serine/threonine-protein kinase SRK2 [EC:2.7.11.1]	PRGDB00189827	Hv.34453	Putative_R-Genes,_predicted_from_NCBI_UniGene	Hordeum vulgare	NL	Hordeum vulgare subsp. vulgare mRNA for predicted protein, complete cds, clone: NIASHv2106K13	6.26e-74	1
XP_008370575.1-D6	scaffold4412	171972	174345	+	Protein kinase domain;Protein of unknown function (DUF616)	POPTRDRAFT_756677; hypothetical protein; K04730 interleukin-1 receptor-associated kinase 1 [EC:2.7.11.1]	PRGDB00188587	Gma.26745	Putative_R-Genes,_predicted_from_NCBI_UniGene	Glycine max	RLP	PREDICTED: Glycine max probable leucine-rich repeat receptor-like protein kinase At5g49770-like (LOC100782142), mRNA	6.05e-94	1
XP_008370139.1-D258	scaffold4385	271961	277826	-	gag-polypeptide of LTR copia-type;Integrase core domain;Zinc knuckle	hypothetical protein; K06228 fused [EC:2.7.11.1]	PRGDB00217533	Thhalv10011182m	Putative_R-Genes,_predicted_from_Pythozome	Eutrema halophilum	CN	--	3.15e-84	1
XP_007148814.1-D10	scaffold4368	17139	23162	-	Disease resistance protein signature;NB-ARC domain;TIR domain	Heat shock protein; K03283 heat shock 70kDa protein 1/8; K06758 L1 cell adhesion molecule like protein	PRGDB00169075	Medtr6g008840.1	Putative_R-Genes,_predicted_from_Pythozome	Medicago truncatula	TNL	disease resistance protein (TIR-NBS-LRR class), putative (best arabidopsis hit)	4.33e-50	1
XP_007150705.1-D10	scaffold435	251095	252762	-	HCO3- transporter family	U-box domain-containing protein 33-like; K04730 interleukin-1 receptor-associated kinase 1 [EC:2.7.11.1]	PRGDB00188903	Gma.52021	Putative_R-Genes,_predicted_from_NCBI_UniGene	Glycine max	CN	PREDICTED: Glycine max U-box domain-containing protein 33-like (LOC100807515), mRNA	1.65e-25	1
XP_002532988.1-D7	scaffold4309	49344	54320	+	Di-glucose binding within endoplasmic reticulum;Protein tyrosine kinase	hypothetical protein; K04733 interleukin-1 receptor-associated kinase 4 [EC:2.7.11.1]	PRGDB00167736	Medtr2g090860.1	Putative_R-Genes,_predicted_from_Pythozome	Medicago truncatula	RLP	Leucine-rich repeat transmembrane protein kinase (best arabidopsis hit)	0	1
XP_007147476.1-D100	scaffold4304	20576	43479	-	Leucine rich repeat N-terminal domain;Protein kinase domain	probable LRR receptor-like serine/threonine-protein kinase At4g31250; K04730 interleukin-1 receptor-associated kinase 1 [EC:2.7.11.1]	PRGDB00167713	Medtr2g050050.1	Putative_R-Genes,_predicted_from_Pythozome	Medicago truncatula	RLP	Leucine-rich repeat protein kinase family protein (best arabidopsis hit)	0	1
XP_003550036.1-D19	scaffold4301	4735	7060	-	Leucine Rich Repeat;Leucine rich repeat N-terminal domain;Protein tyrosine kinase	Os01g0819100; Similar to predicted protein.; K04733 interleukin-1 receptor-associated kinase 4 [EC:2.7.11.1]	PRGDB00156242	Glyma02g40340.1	Putative_R-Genes,_predicted_from_Pythozome	Glycine max	RLP	Leucine-rich repeat protein kinase family protein (best arabidopsis hit)	0	1
XP_006596179.1	scaffold4293	436456	442337	+	haloacid dehalogenase-like hydrolase;Uncharacterized protein family UPF0054	hypothetical protein; K07042 probable rRNA maturation factor	PRGDB00078524	Vvi.704	Putative_R-Genes,_predicted_from_NCBI_UniGene	Vitis vinifera	RLP	PREDICTED: Vitis vinifera hypothetical protein LOC100268155 (LOC100268155), mRNA	0	1
XP_007149537.1-D2	scaffold4263	212171	221211	-	Di-glucose binding within endoplasmic reticulum;Leucine rich repeat;Protein kinase domain	hypothetical protein; K04733 interleukin-1 receptor-associated kinase 4 [EC:2.7.11.1]	PRGDB00162237	Glyma12g36190.1	Putative_R-Genes,_predicted_from_Pythozome	Glycine max	RLP	Leucine-rich repeat transmembrane protein kinase (best arabidopsis hit)	0	1
NP_197417.1-D16	scaffold4173	66550	70212	+	GDSL/SGNH-like Acyl-Esterase family found in Pmr5 and Cas1p;Protein kinase domain	serine-threonine protein kinase, plant-type, putative (EC:2.7.10.2); K04733 interleukin-1 receptor-associated kinase 4 [EC:2.7.11.1]	PRGDB00194454	Pgl.16506	Putative_R-Genes,_predicted_from_NCBI_UniGene	Picea glauca	RLK-GNK2	Picea glauca clone GQ03518_C06 mRNA sequence	1.31e-27	1
XP_004495773.1-D2	scaffold4171	326267	333696	-	Ethylene-responsive protein kinase Le-CTR1;Protein tyrosine kinase;Tyrosine kinase catalytic domain signature	hypothetical protein; K10357 myosin V	PRGWK00000005	MELO3C002125	Contributed_R-Genes	Cucumis melo	RLK	--	3.12e-146	1
XP_002526439.1-D16	scaffold4153	44292	46100	+	Protein kinase domain	shaggy-related protein kinase kappa-like; K03083 glycogen synthase kinase 3 beta [EC:2.7.11.26]	PRGDB00213723	MDP0000127212	Putative_R-Genes,_predicted_from_Pythozome	Malus x domestica	RLP	--	2.59e-33	1
XP_008354068.1-D6	scaffold4136	71376	74225	-	Reverse transcriptase (RNA-dependent DNA polymerase)	60S ribosomal export protein NMD3; K07562 nonsense-mediated mRNA decay protein 3	PRGDB00186672	--	Putative_R-Genes,_collected_from_NCBI_Protein	Arachis hypogaea	NL	Arachis hypogaea clone AHF-205D04 NBS-LRR gene cluster, complete sequence.	0	1
XP_006607041.1-D179	scaffold4124	14916	15362	-	Reverse transcriptase (RNA-dependent DNA polymerase)	Myosin XI; K10357 myosin V	PRGDB00186672	--	Putative_R-Genes,_collected_from_NCBI_Protein	Arachis hypogaea	NL	Arachis hypogaea clone AHF-205D04 NBS-LRR gene cluster, complete sequence.	3.68e-51	1
XP_007152378.1-D6	scaffold4096	40084	44305	-	Protein kinase domain;Salt stress response/antifungal	Serine/threonine protein kinase; K04733 interleukin-1 receptor-associated kinase 4 [EC:2.7.11.1]	PRGDB00188648	Gma.30612	Putative_R-Genes,_predicted_from_NCBI_UniGene	Glycine max	RLK-GNK2	PREDICTED: Glycine max putative cysteine-rich receptor-like protein kinase 23-like (LOC100806048), mRNA	1.36e-152	1
NP_001237411.1-D9	scaffold409	102772	110342	+	Leucine Rich Repeat;Leucine rich repeat N-terminal domain;Protein kinase domain	Receptor-like protein kinase; K17422 large subunit ribosomal protein L41	PRGDB00188827	Gma.45286	Putative_R-Genes,_predicted_from_NCBI_UniGene	Glycine max	RLP	PREDICTED: Glycine max leucine-rich repeat receptor-like serine	0	1
XP_012574773.1-D5	scaffold4079	193337	227301	+	Leucine rich repeat;Leucine Rich Repeat;Leucine rich repeat N-terminal domain;Protein kinase domain	Receptor-like protein kinase; K17422 large subunit ribosomal protein L41	PRGDB00195522	Phvulv091020810m	Putative_R-Genes,_predicted_from_Pythozome	Phaseolus vulgaris	RLP	--	0	1
XP_012570563.1	scaffold4047	26854	28510	+	Reverse transcriptase (RNA-dependent DNA polymerase)	uncharacterized LOC104905624; K05658 ATP-binding cassette, subfamily B (MDR/TAP), member 1 [EC:3.6.3.44]	PRGDB00047409	TIR-NBS-LRR-TIR type disease resistance protein	Putative_R-Genes,_collected_from_NCBI_Protein	Populus trichocarpa	TNL	Populus trichocarpa clone 110301 TIR-NBS-LRR-TIR type disease resistance protein mRNA, partial cds.	4.41e-48	1
XP_004513532.1-D2	scaffold404	25851	27025	-	Cupin;Germin signature	uncharacterized LOC101250545; K11426 SET and MYND domain-containing protein	PRGDB00182795	GSVIVT01000058001	Putative_R-Genes,_predicted_from_Pythozome	Vitis vinifera	RLP	Leucine-rich repeat protein kinase family protein (best arabidopsis hit)	3.07e-83	1
XP_007139781.1	scaffold4007	79779	81557	-	WRKY DNA -binding domain	WRKY transcription factor 22-like; K13425 WRKY transcription factor 22	PRGDB00203795	Carubv10025744m	Putative_R-Genes,_predicted_from_Pythozome	Capsella rubella	TNL	--	2.18e-28	1
XP_002517527.1-D9	scaffold4001	14128	17186	+	ABC transporter	ABC transporter F family member 1-like; K06185 ATP-binding cassette, subfamily F, member 2	PRGDB00068820	Gma.7643	Putative_R-Genes,_predicted_from_NCBI_UniGene	Glycine max	NL	Glycine max cDNA, clone: GMFL01-41-C06	1.55e-83	1
XP_007159170.1-D406	scaffold3988	4695	5165	-	Protein tyrosine kinase	putative serine/threonine-protein kinase; K04733 interleukin-1 receptor-associated kinase 4 [EC:2.7.11.1]	PRGDB00188689	Gma.36403	Putative_R-Genes,_predicted_from_NCBI_UniGene	Glycine max	RLP	PREDICTED: Glycine max probable leucine-rich repeat receptor-like protein kinase At1g35710-like (LOC100806056), mRNA	5.34e-95	1
XP_003518009.1-D2	scaffold3984	21541	26691	+	Carbohydrate-binding protein of the ER	hypothetical protein; K16224 senescence-induced receptor-like serine/threonine-protein kinase	PRGWK00000726	Solyc05g009800.1.1	Contributed_R-Genes	Solanum lycopersicum	RLP-Malectin	--	0	1
XP_007135595.1-D4	scaffold3962	36479	39768	-	Peptidase dimerisation domain;Peptidase family M20/M25/M40	IAA-amino acid hydrolase ILR1-like 4-like; K14664 IAA-amino acid hydrolase [EC:3.5.1.-]	PRGDB00167788	Medtr2g121840.1	Putative_R-Genes,_predicted_from_Pythozome	Medicago truncatula	RLP	Leucine-rich repeat transmembrane protein kinase protein (best arabidopsis hit)	3.15e-68	1
XP_007138872.1-D129	scaffold3931	122932	125235	-	Leucine rich repeat;Leucine Rich Repeat;Leucine-rich repeat signature;Protein tyrosine kinase	systemin receptor SR160; K13415 protein brassinosteroid insensitive 1 [EC:2.7.10.1 2.7.11.1]	PRGDB00196336	Phvulv091016125m	Putative_R-Genes,_predicted_from_Pythozome	Phaseolus vulgaris	RLP	--	2.82e-155	1
XP_007157782.1	scaffold3904	43034	47552	+	Disease resistance protein signature;Leucine Rich Repeat;NB-ARC domain;TIR domain	hypothetical protein; K19613 leucine-rich repeat protein SHOC2	PRGDB00196575	Phvulv091017493m	Putative_R-Genes,_predicted_from_Pythozome	Phaseolus vulgaris	TNL	--	0	1
XP_008365528.1-D173	scaffold3886	351411	357124	-	Leucine rich repeat N-terminal domain;Protein kinase domain	somatic embryogenesis receptor kinase 2-like; K13418 somatic embryogenesis receptor kinase 1 [EC:2.7.10.1 2.7.11.1]	PRGDB00188278	Gma.5880	Putative_R-Genes,_predicted_from_NCBI_UniGene	Glycine max	RLP	PREDICTED: Glycine max probable LRR receptor-like serine	0	1
XP_007148685.1-D4	scaffold3850	505358	508507	-	Leucine rich repeat;Leucine rich repeats (6 copies);Leucine-rich repeat signature;Protein kinase domain	systemin receptor SR160; K13415 protein brassinosteroid insensitive 1 [EC:2.7.10.1 2.7.11.1]	PRGDB00159733	Glyma08g09750.1	Putative_R-Genes,_predicted_from_Pythozome	Glycine max	RLP	BRI1-like 2 (best arabidopsis hit)	0	1
XP_006582117.1	scaffold3846	48730	57386	-	Di-glucose binding within endoplasmic reticulum;Leucine rich repeat;Protein tyrosine kinase	hypothetical protein; K04733 interleukin-1 receptor-associated kinase 4 [EC:2.7.11.1]	PRGDB00192142	Mtr.1466	Putative_R-Genes,_predicted_from_NCBI_UniGene	Medicago truncatula	RLP	Medicago truncatula Receptor-like serine	0	1
XP_006607041.1-D29	scaffold3832	133115	133747	+	Reverse transcriptase (RNA-dependent DNA polymerase)	Myosin XI; K10357 myosin V	PRGDB00186672	--	Putative_R-Genes,_collected_from_NCBI_Protein	Arachis hypogaea	NL	Arachis hypogaea clone AHF-205D04 NBS-LRR gene cluster, complete sequence.	6.19e-83	1
XP_004500511.1	scaffold3826	13474	17040	+	Leucine rich repeat;Leucine rich repeat N-terminal domain;Protein tyrosine kinase	probable inactive receptor-like protein kinase At3g56050; K04733 interleukin-1 receptor-associated kinase 4 [EC:2.7.11.1]	PRGDB00188817	Gma.44875	Putative_R-Genes,_predicted_from_NCBI_UniGene	Glycine max	RLP	PREDICTED: Glycine max probable LRR receptor-like serine	0	1
XP_002515931.1-D15	scaffold3783	95672	97311	-	Protein tyrosine kinase	hypothetical protein; K04733 interleukin-1 receptor-associated kinase 4 [EC:2.7.11.1]	PRGDB00159949	Glyma08g21190.1	Putative_R-Genes,_predicted_from_Pythozome	Glycine max	RLP	Leucine-rich repeat transmembrane protein kinase protein (best arabidopsis hit)	9.92e-139	1
XP_003524997.1-D2	scaffold3764	137982	142182	-	Protein tyrosine kinase	serine/threonine-protein kinase At5g01020; K04733 interleukin-1 receptor-associated kinase 4 [EC:2.7.11.1]	PRGDB00159802	Glyma08g13040.1	Putative_R-Genes,_predicted_from_Pythozome	Glycine max	NL	Protein kinase superfamily protein (best arabidopsis hit)	3.09e-174	1
XP_014619626.1-D7	scaffold376	76406	78952	+	Protein kinase domain	Protein kinase, putative; K03083 glycogen synthase kinase 3 beta [EC:2.7.11.26]	PRGDB00215771	MDP0000180284	Putative_R-Genes,_predicted_from_Pythozome	Malus x domestica	RLP	--	0	1
XP_003540697.2	scaffold3758	561502	564787	+	Protein kinase domain	hypothetical protein; K04730 interleukin-1 receptor-associated kinase 1 [EC:2.7.11.1]	PRGWK00001048	Solyc11g044940.1.1	Contributed_R-Genes	Solanum lycopersicum	Pto-like	--	0	1
XP_006607041.1-D21	scaffold3751	175808	176440	+	Reverse transcriptase (RNA-dependent DNA polymerase)	Myosin XI; K10357 myosin V	PRGDB00186672	--	Putative_R-Genes,_collected_from_NCBI_Protein	Arachis hypogaea	NL	Arachis hypogaea clone AHF-205D04 NBS-LRR gene cluster, complete sequence.	2.4e-81	1
XP_014629887.1	scaffold3744	50612	53134	+	Protein kinase domain	proline-rich receptor-like protein kinase PERK4; K04730 interleukin-1 receptor-associated kinase 1 [EC:2.7.11.1]	PRGDB00217566	Thhalv10011979m	Putative_R-Genes,_predicted_from_Pythozome	Eutrema halophilum	RLP	--	2.46e-133	1
XP_007147270.1	scaffold3722	684739	688181	-	Aldose 1-epimerase	hypothetical protein; K01792 glucose-6-phosphate 1-epimerase [EC:5.1.3.15]	PRGDB00201591	Bra013728	Putative_R-Genes,_predicted_from_Pythozome	Brassica rapa	RLP	--	1e-141	1
XP_006607041.1-D113	scaffold3720	91910	92356	+	Reverse transcriptase (RNA-dependent DNA polymerase)	Myosin XI; K10357 myosin V	PRGDB00186672	--	Putative_R-Genes,_collected_from_NCBI_Protein	Arachis hypogaea	NL	Arachis hypogaea clone AHF-205D04 NBS-LRR gene cluster, complete sequence.	3.68e-51	1
XP_012568090.1-D51	scaffold3714	162804	215411	+	Disease resistance protein signature;NB-ARC domain;TIR domain	hypothetical protein; K19613 leucine-rich repeat protein SHOC2	PRGDB00165324	Glyma20g10830.1	Putative_R-Genes,_predicted_from_Pythozome	Glycine max	TNL	disease resistance protein (TIR-NBS-LRR class), putative (best arabidopsis hit)	2.88e-32	1
XP_014628784.1-D2	scaffold3700	106338	109580	-	Protein tyrosine kinase	hypothetical protein; K04733 interleukin-1 receptor-associated kinase 4 [EC:2.7.11.1]	PRGDB00078803	Vvi.12916	Putative_R-Genes,_predicted_from_NCBI_UniGene	Vitis vinifera	N	PREDICTED: Vitis vinifera hypothetical protein LOC100262734 (LOC100262734), mRNA	0	1
XP_003540402.1	scaffold3686	49909	50448	+	Protein of unknown function (DUF640)	-	PRGDB00149355	clementine0.9_000252m	Putative_R-Genes,_predicted_from_Pythozome	Citrus clementina	CNL	NB-ARC domain-containing disease resistance protein (best arabidopsis hit)	2.58e-87	1
XP_004504609.1-D16	scaffold3681	68257	71406	-	Leucine rich repeat;Leucine Rich Repeat;Leucine rich repeat N-terminal domain;Protein kinase domain	hypothetical protein; K04730 interleukin-1 receptor-associated kinase 1 [EC:2.7.11.1]	PRGDB00195908	Phvulv091017693m	Putative_R-Genes,_predicted_from_Pythozome	Phaseolus vulgaris	RLP	--	0	1
NP_193747.2-D10	scaffold3678	240787	250327	+	Leucine rich repeat;Leucine Rich Repeat;Protein kinase domain	LRR receptor-like serine/threonine-protein kinase FLS2-like; K13420 LRR receptor-like serine/threonine-protein kinase FLS2 [EC:2.7.11.1]	PRGDB00188424	Gma.18772	Putative_R-Genes,_predicted_from_NCBI_UniGene	Glycine max	RLP	PREDICTED: Glycine max probable LRR receptor-like serine	0	1
XP_014629886.1	scaffold3665	82583	86449	-	Leucine rich repeat;Leucine Rich Repeat;Leucine rich repeat N-terminal domain;Protein tyrosine kinase	systemin receptor SR160-like; K13415 protein brassinosteroid insensitive 1 [EC:2.7.10.1 2.7.11.1]	PRGDB00188874	Gma.50321	Putative_R-Genes,_predicted_from_NCBI_UniGene	Glycine max	RLP	PREDICTED: Glycine max probable LRR receptor-like serine	0	1
XP_014617136.1-D138	scaffold3658	96103	97217	-	Reverse transcriptase (RNA-dependent DNA polymerase)	uncharacterized LOC100245431; K05387 glutamate receptor, ionotropic, plant	PRGDB00047409	TIR-NBS-LRR-TIR type disease resistance protein	Putative_R-Genes,_collected_from_NCBI_Protein	Populus trichocarpa	TNL	Populus trichocarpa clone 110301 TIR-NBS-LRR-TIR type disease resistance protein mRNA, partial cds.	1.2e-51	1
XP_014624618.1	scaffold3635	7922	9329	+	B3 DNA binding domain	hypothetical protein; K09287 RAV-like factor	PRGDB00189344	Hv.10056	Putative_R-Genes,_predicted_from_NCBI_UniGene	Hordeum vulgare	NL	Hordeum vulgare subsp. vulgare mRNA for predicted protein, complete cds, clone: NIASHv2087M16	9.29e-37	1
NP_189178.1-D143	scaffold3623	99309	137143	-	Leucine rich repeat	putative disease resistance protein At3g14460; K19613 leucine-rich repeat protein SHOC2	PRGDB00156529	Glyma03g04590.1	Putative_R-Genes,_predicted_from_Pythozome	Glycine max	NL	LRR and NB-ARC domains-containing disease resistance protein (best arabidopsis hit)	9.1e-30	1
XP_012570419.1-D78	scaffold3608	12894	23006	+	-	uncharacterized LOC100245431; K05387 glutamate receptor, ionotropic, plant	PRGDB00188818	Gma.45040	Putative_R-Genes,_predicted_from_NCBI_UniGene	Glycine max	NL	PREDICTED: Glycine max putative disease resistance protein At4g11170-like (LOC100803552), mRNA	5.63e-27	1
XP_012568090.1-D22	scaffold3579	124893	155604	+	Disease resistance protein signature;Leucine rich repeat;Leucine Rich Repeat;NB-ARC domain;TIR domain	hypothetical protein; K19613 leucine-rich repeat protein SHOC2	PRGDB00168274	Medtr4g109860.1	Putative_R-Genes,_predicted_from_Pythozome	Medicago truncatula	TNL	disease resistance protein (TIR-NBS-LRR class), putative (best arabidopsis hit)	0	1
XP_006573705.1-D3	scaffold3571	58425	61083	+	Casein kinase II regulatory subunit;Casein kinase II regulatory subunit family signature	Casein kinase II beta chain 1 isoform 1; K03115 casein kinase II subunit beta	PRGDB00194797	Vca.1757	Putative_R-Genes,_predicted_from_NCBI_UniGene	Volvox carteri	N	Volvox carteri f. nagariensis hypothetical protein, mRNA	3.98e-99	1
XP_002525400.1-D2	scaffold357	13186	16551	-	Leucine rich repeat;Leucine rich repeat N-terminal domain;Protein kinase domain	hypothetical protein; K13418 somatic embryogenesis receptor kinase 1 [EC:2.7.10.1 2.7.11.1]	PRGDB00188717	Gma.38046	Putative_R-Genes,_predicted_from_NCBI_UniGene	Glycine max	RLP	PREDICTED: Glycine max protein NSP-INTERACTING KINASE 3-like (LOC100806943), mRNA	0	1
XP_014617136.1-D556	scaffold3566	78183	79320	-	Reverse transcriptase (RNA-dependent DNA polymerase)	uncharacterized LOC100245431; K05387 glutamate receptor, ionotropic, plant	PRGDB00047409	TIR-NBS-LRR-TIR type disease resistance protein	Putative_R-Genes,_collected_from_NCBI_Protein	Populus trichocarpa	TNL	Populus trichocarpa clone 110301 TIR-NBS-LRR-TIR type disease resistance protein mRNA, partial cds.	2.96e-47	1
XP_004499432.1	scaffold3543	11382	20236	+	ABC-2 family transporter protein;ABC transporter	POPTRDRAFT_831828; ABC transporter family protein; K05643 ATP-binding cassette, subfamily A (ABC1), member 3	PRGDB00149440	clementine0.9_001644m	Putative_R-Genes,_predicted_from_Pythozome	Citrus clementina	N	ABC2 homolog 6 (best arabidopsis hit)	0	1
NP_177451.1-D16	scaffold3523	216371	219758	-	Leucine rich repeat;Leucine rich repeat N-terminal domain;Leucine-rich repeat signature;Protein kinase domain	Receptor-like protein kinase; K17422 large subunit ribosomal protein L41	PRGDB00196230	Phvulv091006120m	Putative_R-Genes,_predicted_from_Pythozome	Phaseolus vulgaris	RLP	--	0	1
XP_004500985.1	scaffold3522	86204	87963	+	Protein kinase domain	mitogen-activated protein kinase homolog NTF3-like; K04371 mitogen-activated protein kinase 1/3 [EC:2.7.11.24]	PRGDB00147216	Bradi4g24910.1	Putative_R-Genes,_predicted_from_Pythozome	Ricinus communis	RLP	mitogen-activated protein kinase 1 (best arabidopsis hit); CGMC_MAPKCMGC_2_SLT2y_ERK.2 - CGMC includes CDA, MAPK, GSK3, and CLKC kinases, expressed (best rice hit)	0	1
XP_003530453.1-D2	scaffold3515	86082	88665	-	70kDa heat shock protein signature;Hsp70 protein	heat shock protein, putative (EC:1.3.1.74); K09490 heat shock 70kDa protein 5	PRGDB00167710	Medtr2g047020.1	Putative_R-Genes,_predicted_from_Pythozome	Medicago truncatula	TNL	heat shock cognate protein 70-1 (best arabidopsis hit)	1.47e-156	1
XP_007156930.1	scaffold3505	10851	13445	+	Protein tyrosine kinase	proline-rich receptor-like protein kinase PERK4-like; K04730 interleukin-1 receptor-associated kinase 1 [EC:2.7.11.1]	PRGDB00217566	Thhalv10011979m	Putative_R-Genes,_predicted_from_Pythozome	Eutrema halophilum	RLP	--	3.01e-136	1
XP_006604039.1-D29	scaffold3499	151014	153834	+	Protein tyrosine kinase;Wall-associated receptor kinase C-terminal	probable receptor-like protein kinase At1g67000-like; K04730 interleukin-1 receptor-associated kinase 1 [EC:2.7.11.1]	PRGDB00203281	Carubv10022795m	Putative_R-Genes,_predicted_from_Pythozome	Capsella rubella	Other	--	4.66e-127	1
XP_003542175.1-D4	scaffold3495	3644	4375	-	-	uncharacterized aarF domain-containing protein kinase At1g79600, chloroplastic-like; K13457 disease resistance protein RPM1	PRGDB00078970	Vvi.20745	Putative_R-Genes,_predicted_from_NCBI_UniGene	Vitis vinifera	CNL	PREDICTED: Vitis vinifera hypothetical protein LOC100252764 (LOC100252764), mRNA	1.23e-35	1
XP_008390015.1-D100	scaffold349	177983	182269	+	Reverse transcriptase (RNA-dependent DNA polymerase)	uncharacterized LOC104905624; K05658 ATP-binding cassette, subfamily B (MDR/TAP), member 1 [EC:3.6.3.44]	PRGDB00217533	Thhalv10011182m	Putative_R-Genes,_predicted_from_Pythozome	Eutrema halophilum	CN	--	7.8e-34	1
NP_180555.2	scaffold3436	132918	145479	-	ABC-2 type transporter;ABC transporter;ABC-transporter extracellular N-terminal;Plant PDR ABC transporter associated	hypothetical protein; K05681 ATP-binding cassette, subfamily G (WHITE), member 2	PRGDB00196211	Phvulv091022481m	Putative_R-Genes,_predicted_from_Pythozome	Phaseolus vulgaris	N	--	0	1
XP_007133637.1-D125	scaffold3408	164101	164559	-	Salt stress response/antifungal	Cysteine-rich receptor-like protein kinase; K04733 interleukin-1 receptor-associated kinase 4 [EC:2.7.11.1]	PRGDB00196348	Phvulv091012369m	Putative_R-Genes,_predicted_from_Pythozome	Phaseolus vulgaris	RLK-GNK2	--	3.85e-67	1
XP_006578802.1-D3	scaffold339	52394	55599	-	Protein kinase domain;Protein of unknown function (DUF632)	serine/threonine-protein kinase ULK3-like; K08269 serine/threonine-protein kinase ULK/ATG1 [EC:2.7.11.1]	PRGDB00215596	MDP0000375492	Putative_R-Genes,_predicted_from_Pythozome	Malus x domestica	RLP	--	6.73e-42	1
XP_007152076.1-D310	scaffold3389	26307	26645	+	Leucine rich repeat;Leucine Rich Repeat;Leucine-rich repeat signature	Di-glucose binding protein with Kinesin motor domain; K10406 kinesin family member C2/C3	PRGDB00064682	Aan.2463	Putative_R-Genes,_predicted_from_NCBI_UniGene	Artemisia annua	RLP	CAZI6530.fwd CAZI Artemisia annua normalized leaf library Artemisia annua cDNA clone CAZI6530 5', mRNA sequence	2e-37	1
XP_004502553.1	scaffold3375	300421	304571	+	GAT domain;VHS domain	-	PRGDB00216535	MDP0000279752	Putative_R-Genes,_predicted_from_Pythozome	Malus x domestica	N	--	1.57e-42	1
XP_007157716.1	scaffold3352	85469	87846	+	-	hypothetical protein; K02984 small subunit ribosomal protein S3Ae	PRGWK00000259	MELO3C019529	Contributed_R-Genes	Cucumis melo	RLP	--	5.35e-163	1
XP_014629390.1	scaffold3294	293818	297708	+	Protein kinase domain	hypothetical protein; K08286 protein-serine/threonine kinase [EC:2.7.11.-]	PRGDB00216033	MDP0000314577	Putative_R-Genes,_predicted_from_Pythozome	Malus x domestica	RLP	--	6.78e-67	1
XP_003554105.1	scaffold3293	77261	79551	+	Cyclin, C-terminal domain;Cyclin, N-terminal domain	G2/mitotic-specific cyclin S13-7-like; K05868 cyclin B	PRGDB00192459	Mtr.22577	Putative_R-Genes,_predicted_from_NCBI_UniGene	Medicago truncatula	CNL	Medicago truncatula NB-LRR type disease resistance protein (MTR_7g089080) mRNA, complete cds	0	1
XP_003548275.1-D18	scaffold3291	223917	225012	+	-	hypothetical protein; K05681 ATP-binding cassette, subfamily G (WHITE), member 2	PRGDB00188355	Gma.11993	Putative_R-Genes,_predicted_from_NCBI_UniGene	Glycine max	N	PREDICTED: Glycine max ABC transporter G family member 11-like (LOC100803731), mRNA	2.71e-79	1
NP_001239662.1	scaffold3285	13551	14855	+	-	hypothetical protein; K13459 disease resistance protein RPS2	PRGDB00144080	907240	Putative_R-Genes,_predicted_from_Pythozome	Arabidopsis lyrata	CNL	Disease resistance protein (CC-NBS-LRR class) family (best arabidopsis hit)	1.6e-29	1
XP_004485471.1-D4	scaffold3281	466633	473286	+	Mlo family	MLO-like protein 4; K08472 mlo protein	PRGDB00192167	Mtr.3114	Putative_R-Genes,_predicted_from_NCBI_UniGene	Medicago truncatula	Mlo-like	Medicago truncatula MLO-like protein (MTR_2g006280) mRNA, complete cds	4.49e-119	1
XP_006581953.1-D2	scaffold3272	113190	126750	-	DnaJ C terminal domain;DnaJ domain;DnaJ domain signature;Leucine rich repeat N-terminal domain;Protein kinase domain	hypothetical protein; K09510 DnaJ homolog subfamily B member 4	PRGDB00194955	Phvulv091017072m	Putative_R-Genes,_predicted_from_Pythozome	Phaseolus vulgaris	RLP	--	0	1
XP_006607041.1-D46	scaffold3240	36942	37574	+	Reverse transcriptase (RNA-dependent DNA polymerase)	Myosin XI; K10357 myosin V	PRGDB00186672	--	Putative_R-Genes,_collected_from_NCBI_Protein	Arachis hypogaea	NL	Arachis hypogaea clone AHF-205D04 NBS-LRR gene cluster, complete sequence.	8.18e-81	1
XP_007132855.1	scaffold3237	57548	58138	+	Protein of unknown function (DUF640)	-	PRGDB00149355	clementine0.9_000252m	Putative_R-Genes,_predicted_from_Pythozome	Citrus clementina	CNL	NB-ARC domain-containing disease resistance protein (best arabidopsis hit)	3.74e-82	1
XP_006602382.1	scaffold3231	189696	193017	-	Protein tyrosine kinase	hypothetical protein; K04733 interleukin-1 receptor-associated kinase 4 [EC:2.7.11.1]	PRGDB00217566	Thhalv10011979m	Putative_R-Genes,_predicted_from_Pythozome	Eutrema halophilum	RLP	--	3.13e-124	1
XP_007148814.1	scaffold3227	126150	130804	+	Disease resistance protein signature;NB-ARC domain	Heat shock protein; K03283 heat shock 70kDa protein 1/8; K06758 L1 cell adhesion molecule like protein	PRGDB00196345	Phvulv091012371m	Putative_R-Genes,_predicted_from_Pythozome	Phaseolus vulgaris	CNL	--	0	1
XP_004490285.1	scaffold3223	105450	115232	-	Phosphoenolpyruvate carboxylase;Phosphoenolpyruvate carboxylase signature	phosphoenolpyruvate carboxylase 4-like; K01595 phosphoenolpyruvate carboxylase [EC:4.1.1.31]	PRGDB00167562	Medtr1g118320.1	Putative_R-Genes,_predicted_from_Pythozome	Medicago truncatula	CN	phosphoenolpyruvate carboxylase 4 (best arabidopsis hit)	0	1
XP_008390015.1-D36	scaffold3182	134802	139131	+	gag-polypeptide of LTR copia-type;Reverse transcriptase (RNA-dependent DNA polymerase)	uncharacterized LOC104905624; K05658 ATP-binding cassette, subfamily B (MDR/TAP), member 1 [EC:3.6.3.44]	PRGDB00217533	Thhalv10011182m	Putative_R-Genes,_predicted_from_Pythozome	Eutrema halophilum	CN	--	2.33e-33	1
XP_007154851.1	scaffold3172	111320	115280	+	Leucine rich repeat;Leucine rich repeat N-terminal domain;Leucine-rich repeat signature;Protein kinase domain	hypothetical protein; K13418 somatic embryogenesis receptor kinase 1 [EC:2.7.10.1 2.7.11.1]	PRGDB00196335	Phvulv091016128m	Putative_R-Genes,_predicted_from_Pythozome	Phaseolus vulgaris	RLP	--	0	1
XP_002518580.1-D29	scaffold3170	72149	72675	-	ABC transporter	-	PRGDB00195757	Phvulv091007225m	Putative_R-Genes,_predicted_from_Pythozome	Phaseolus vulgaris	N	--	1.46e-30	1
XP_003555805.2	scaffold315	250973	261564	-	ATPase family associated with various cellular activities (AAA);ATP-dependent protease La (LON) substrate-binding domain;Endopeptidase La (Lon) serine protease (S16) signature;Lon protease (S16) C-terminal proteolytic domain	lon protease homolog 1, mitochondrial-like; K08675 Lon-like ATP-dependent protease [EC:3.4.21.-]	PRGDB00158618	Glyma06g35980.1	Putative_R-Genes,_predicted_from_Pythozome	Glycine max	CNL	lon protease 1 (best arabidopsis hit)	0	1
XP_007133997.1-D4	scaffold3133	13114	16009	+	Protein kinase domain	probable serine/threonine-protein kinase NAK-like; K04733 interleukin-1 receptor-associated kinase 4 [EC:2.7.11.1]	PRGDB00207849	Aquca_027_00169.1	Putative_R-Genes,_predicted_from_Pythozome	Aquilegia coerulea	RLP	--	0	1
XP_012568530.1-D19	scaffold313	71137	73859	+	Protein kinase domain	Os01g0819100; Similar to predicted protein.; K04733 interleukin-1 receptor-associated kinase 4 [EC:2.7.11.1]	PRGDB00195643	Phvulv091005590m	Putative_R-Genes,_predicted_from_Pythozome	Phaseolus vulgaris	RLP	--	0	1
XP_007149249.1-D84	scaffold3098	136399	139482	+	Leucine rich repeat;Leucine Rich Repeat;Protein kinase domain	hypothetical protein; K04730 interleukin-1 receptor-associated kinase 1 [EC:2.7.11.1]	PRGDB00188249	Gma.4094	Putative_R-Genes,_predicted_from_NCBI_UniGene	Glycine max	RLP	PREDICTED: Glycine max probable LRR receptor-like serine	0	1
XP_002520400.1-D3	scaffold3071	46562	47124	+	PPP5 TPR repeat region	protein phosphatase-5, putative (EC:3.1.3.16); K04460 serine/threonine-protein phosphatase 5 [EC:3.1.3.16]	PRGDB00215267	MDP0000256952	Putative_R-Genes,_predicted_from_Pythozome	Malus x domestica	RLP	--	3.49e-39	1
NP_187677.1	scaffold3057	46404	53353	+	EF-hand domain pair;Protein kinase domain	CDPK; calcium-dependent protein kinase; K13412 calcium-dependent protein kinase [EC:2.7.11.1]	PRGDB00213743	MDP0000457940	Putative_R-Genes,_predicted_from_Pythozome	Malus x domestica	TNL	--	0	1
XP_014626945.1-D6	scaffold3030	14658	37935	+	Phosphoenolpyruvate carboxylase	phosphoenolpyruvate carboxylase 4; K01595 phosphoenolpyruvate carboxylase [EC:4.1.1.31]	PRGDB00167562	Medtr1g118320.1	Putative_R-Genes,_predicted_from_Pythozome	Medicago truncatula	CN	phosphoenolpyruvate carboxylase 4 (best arabidopsis hit)	2.15e-31	1
XP_004485726.1-D205	scaffold302	231300	233243	-	Disease resistance protein signature;NB-ARC domain	putative disease resistance protein RGA3; K15078 structure-specific endonuclease subunit SLX1 [EC:3.6.1.-]	PRGDB00195548	Phvulv091020863m	Putative_R-Genes,_predicted_from_Pythozome	Phaseolus vulgaris	CNL	--	0	1
XP_008354068.1-D25	scaffold3011	12178	15012	+	Endonuclease/Exonuclease/phosphatase family;Reverse transcriptase (RNA-dependent DNA polymerase)	60S ribosomal export protein NMD3; K07562 nonsense-mediated mRNA decay protein 3	PRGDB00186672	--	Putative_R-Genes,_collected_from_NCBI_Protein	Arachis hypogaea	NL	Arachis hypogaea clone AHF-205D04 NBS-LRR gene cluster, complete sequence.	0	1
XP_002532890.1-D3	scaffold3004	9256	14311	+	Leucine rich repeat;Leucine rich repeat N-terminal domain;Protein kinase domain	hypothetical protein; K13418 somatic embryogenesis receptor kinase 1 [EC:2.7.10.1 2.7.11.1]	PRGDB00188960	Gma.58582	Putative_R-Genes,_predicted_from_NCBI_UniGene	Glycine max	RLP	PREDICTED: Glycine max protein NSP-INTERACTING KINASE 2-like (LOC100790194), mRNA	0	1
XP_012568530.1-D90	scaffold3003	110203	112846	+	Leucine rich repeat;Leucine-rich repeat signature;Protein kinase domain	CLV1B; receptor protein kinase-like protein; K00924	PRGDB00195316	Phvulv091016476m	Putative_R-Genes,_predicted_from_Pythozome	Phaseolus vulgaris	RLP	--	0	1
XP_012570419.1-D42	scaffold2983	35523	36065	+	-	uncharacterized LOC100245431; K05387 glutamate receptor, ionotropic, plant	PRGDB00188818	Gma.45040	Putative_R-Genes,_predicted_from_NCBI_UniGene	Glycine max	NL	PREDICTED: Glycine max putative disease resistance protein At4g11170-like (LOC100803552), mRNA	1.82e-29	1
XP_007158852.1	scaffold2977	48458	52351	-	Leucine rich repeat;Leucine Rich Repeat;Leucine rich repeat N-terminal domain;Leucine-rich repeat signature;Protein kinase domain	LRR receptor-like serine/threonine-protein kinase FLS2-like; K13420 LRR receptor-like serine/threonine-protein kinase FLS2 [EC:2.7.11.1]	PRGDB00157907	Glyma05g26520.1	Putative_R-Genes,_predicted_from_Pythozome	Glycine max	RLP	Leucine-rich repeat transmembrane protein kinase (best arabidopsis hit)	0	1
NP_199445.1-D6	scaffold2967	68153	71542	+	Leucine rich repeat;Leucine Rich Repeat;Leucine rich repeat N-terminal domain;Protein tyrosine kinase	LRR receptor-like serine/threonine-protein kinase FLS2; K13420 LRR receptor-like serine/threonine-protein kinase FLS2 [EC:2.7.11.1]	PRGDB00161502	Glyma11g07970.1	Putative_R-Genes,_predicted_from_Pythozome	Glycine max	RLP	Leucine-rich receptor-like protein kinase family protein (best arabidopsis hit)	0	1
XP_004502878.1	scaffold29536	8091	11702	+	Leucine rich repeat;Leucine rich repeat N-terminal domain;Leucine-rich repeat signature;Protein kinase domain	brassinosteroid LRR receptor kinase; K13415 protein brassinosteroid insensitive 1 [EC:2.7.10.1 2.7.11.1]	PRGDB00196486	Phvulv091026475m	Putative_R-Genes,_predicted_from_Pythozome	Phaseolus vulgaris	RLP	--	0	1
XP_002532495.1-D38	scaffold29507	511	798	-	Protein kinase domain	serine/threonine-protein kinase EDR1; K04424 sterile alpha motif and leucine zipper containing kinase AZK [EC:2.7.11.25]	PRGWK00000005	MELO3C002125	Contributed_R-Genes	Cucumis melo	RLK	--	8.61e-30	1
XP_014633575.1-D240	scaffold2933	20149	20454	-	-	uncharacterized LOC104905624; K05658 ATP-binding cassette, subfamily B (MDR/TAP), member 1 [EC:3.6.3.44]	PRGDB00178373	POPTR_0672s00200.1	Putative_R-Genes,_predicted_from_Pythozome	Populus trichocarpa	RLP	Leucine-rich repeat protein kinase family protein (best arabidopsis hit)	1.51e-26	1
XP_002526561.1-D8	scaffold29301	11281	15872	-	Leucine rich repeat;Leucine rich repeat N-terminal domain;Leucine-rich repeat signature;Protein kinase domain	probable LRR receptor-like serine/threonine-protein kinase At4g08850-like; K04730 interleukin-1 receptor-associated kinase 1 [EC:2.7.11.1]	PRGDB00189109	Gma.62260	Putative_R-Genes,_predicted_from_NCBI_UniGene	Glycine max	RLP	PREDICTED: Glycine max probable LRR receptor-like serine	0	1
XP_008377542.1-D44	scaffold2926	13538	14539	-	ABC transporter;Multicopper oxidase	hypothetical protein; K05681 ATP-binding cassette, subfamily G (WHITE), member 2	PRGDB00069482	Gra.914	Putative_R-Genes,_predicted_from_NCBI_UniGene	Gossypium raimondii	N	GR__Eb015K05.r GR__Eb Gossypium raimondii cDNA clone GR__Eb015K05 3', mRNA sequence	1.17e-55	1
XP_008372622.1-D163	scaffold2919	187307	187936	-	gag-polypeptide of LTR copia-type	myb-related protein Myb4-like; K09422 myb proto-oncogene protein, plant	PRGDB00215527	MDP0000553601	Putative_R-Genes,_predicted_from_Pythozome	Malus x domestica	TNL	--	1.87e-62	1
XP_008354068.1-D7	scaffold289	360146	362995	-	Reverse transcriptase (RNA-dependent DNA polymerase)	60S ribosomal export protein NMD3; K07562 nonsense-mediated mRNA decay protein 3	PRGDB00186672	--	Putative_R-Genes,_collected_from_NCBI_Protein	Arachis hypogaea	NL	Arachis hypogaea clone AHF-205D04 NBS-LRR gene cluster, complete sequence.	0	1
XP_006594862.1	scaffold288	66285	72574	+	Leucine rich repeat;Leucine rich repeat N-terminal domain;Protein tyrosine kinase	hypothetical protein; K04730 interleukin-1 receptor-associated kinase 1 [EC:2.7.11.1]	PRGDB00189058	Gma.61272	Putative_R-Genes,_predicted_from_NCBI_UniGene	Glycine max	RLP	PREDICTED: Glycine max protein STRUBBELIG-RECEPTOR FAMILY 3-like (LOC100813617), mRNA	0	1
XP_007158852.1-D90	scaffold2877	96467	103416	-	Leucine rich repeat;Leucine Rich Repeat;Leucine rich repeat N-terminal domain;Protein tyrosine kinase	uncharacterized LOC100274594; K04730 interleukin-1 receptor-associated kinase 1 [EC:2.7.11.1]	PRGDB00157536	Glyma04g40080.1	Putative_R-Genes,_predicted_from_Pythozome	Glycine max	RLP	Leucine-rich repeat protein kinase family protein (best arabidopsis hit)	0	1
XP_003522288.1-D4	scaffold2855	21647	27003	+	Mlo family	MLO-like protein 1-like; K08472 mlo protein	PRGDB00157089	Glyma04g00370.1	Putative_R-Genes,_predicted_from_Pythozome	Glycine max	Mlo-like	Seven transmembrane MLO family protein (best arabidopsis hit)	6.16e-84	1
XP_007159313.1	scaffold2852	77309	87040	-	-	-	PRGDB00215932	MDP0000247856	Putative_R-Genes,_predicted_from_Pythozome	Malus x domestica	TNL	--	0	1
XP_012569401.1	scaffold2849	80305	87974	+	ABC transporter	ATP-binding cassette, sub-family G, member 2; K05681 ATP-binding cassette, subfamily G (WHITE), member 2	PRGDB00162523	Glyma13g20750.1	Putative_R-Genes,_predicted_from_Pythozome	Glycine max	N	non-intrinsic ABC protein 12 (best arabidopsis hit)	0	1
XP_002511751.1	scaffold2848	7368	9896	+	Protein kinase domain	hypothetical protein; K04730 interleukin-1 receptor-associated kinase 1 [EC:2.7.11.1]	PRGDB00067978	Ccl.11915	Putative_R-Genes,_predicted_from_NCBI_UniGene	Citrus clementina	RLK	IC0AAA88BC03RM1 CitNFL Citrus clementina cDNA 5', mRNA sequence	9.74e-83	1
XP_007146336.1-D493	scaffold2835	95032	95562	-	-	uncharacterized LOC104905624; K05658 ATP-binding cassette, subfamily B (MDR/TAP), member 1 [EC:3.6.3.44]	PRGDB00175646	POPTR_0014s01150.1	Putative_R-Genes,_predicted_from_Pythozome	Populus trichocarpa	CNL	LRR and NB-ARC domains-containing disease resistance protein (best arabidopsis hit)	5.04e-33	1
XP_004501846.1-D48	scaffold2817	117028	117549	+	Leucine rich repeat	hypothetical protein; K13420 LRR receptor-like serine/threonine-protein kinase FLS2 [EC:2.7.11.1]	PRGDB00188985	Gma.59249	Putative_R-Genes,_predicted_from_NCBI_UniGene	Glycine max	RLP	PREDICTED: Glycine max leucine-rich repeat receptor-like serine	1.88e-66	1
XP_007144753.1	scaffold2809	221610	222803	+	Ring finger domain	RING finger family protein; K10664 E3 ubiquitin-protein ligase ATL6/9/15/31/42/55 [EC:2.3.2.27]	PRGDB00191694	Lsa.50102	Putative_R-Genes,_predicted_from_NCBI_UniGene	Lactuca sativa	N	TSA: Lactuca sativa Letassy_X1_3887 mRNA sequence	4.89e-30	1
XP_004514489.1	scaffold2790	222834	242264	-	Protein of unknown function (DUF740)	-	PRGDB00214816	MDP0000171887	Putative_R-Genes,_predicted_from_Pythozome	Malus x domestica	CNL	--	1.35e-34	1
NP_178984.1-D2	scaffold2787	8709	10652	+	ABC-2 type transporter;ABC transporter	ppabcg12; ATP-binding cassette transporter, subfamily G, member 12, group WBC protein PpABCG12; K05681 ATP-binding cassette, subfamily G (WHITE), member 2	PRGDB00168351	Medtr4g142950.1	Putative_R-Genes,_predicted_from_Pythozome	Medicago truncatula	N	ABC-2 type transporter family protein (best arabidopsis hit)	0	1
XP_002528881.1-D51	scaffold2778	322264	362362	-	Legume lectin domain;Protein kinase domain	L-type lectin-domain containing receptor kinase IX.1-like; K04730 interleukin-1 receptor-associated kinase 1 [EC:2.7.11.1]	PRGDB00206645	Lus10016836	Putative_R-Genes,_predicted_from_Pythozome	Linum usitatissimum	N	--	1.88e-30	1
XP_003530453.1	scaffold2777	168108	170707	+	70kDa heat shock protein signature;Hsp70 protein	heat shock protein, putative (EC:1.3.1.74); K09490 heat shock 70kDa protein 5	PRGDB00167710	Medtr2g047020.1	Putative_R-Genes,_predicted_from_Pythozome	Medicago truncatula	TNL	heat shock cognate protein 70-1 (best arabidopsis hit)	4.3e-86	1
NP_177209.1-D2	scaffold2741	43038	45944	+	Protein tyrosine kinase;Salt stress response/antifungal	cysteine-rich receptor-like protein kinase 3; K04733 interleukin-1 receptor-associated kinase 4 [EC:2.7.11.1]	PRGDB00155432	Glyma01g03420.1	Putative_R-Genes,_predicted_from_Pythozome	Glycine max	RLK-GNK2	cysteine-rich RLK (RECEPTOR-like protein kinase) 2 (best arabidopsis hit)	0	1
XP_004511618.1	scaffold27265	36932	38505	-	Staygreen protein	proteinaceous RNase P 1, chloroplastic/mitochondrial-like; K18213 proteinaceous RNase P [EC:3.1.26.5]	PRGDB00201520	Bra013656	Putative_R-Genes,_predicted_from_Pythozome	Brassica rapa	RLK-GNK2	--	1.97e-107	1
XP_008372622.1-D45	scaffold27063	140	766	+	gag-polypeptide of LTR copia-type	myb-related protein Myb4-like; K09422 myb proto-oncogene protein, plant	PRGDB00215527	MDP0000553601	Putative_R-Genes,_predicted_from_Pythozome	Malus x domestica	TNL	--	1.21e-65	1
XP_007138799.1-D3	scaffold269	152483	156348	-	Aldose 1-epimerase	putative glucose-6-phosphate 1-epimerase-like; K01792 glucose-6-phosphate 1-epimerase [EC:5.1.3.15]	PRGDB00201591	Bra013728	Putative_R-Genes,_predicted_from_Pythozome	Brassica rapa	RLP	--	1.4e-127	1
XP_002531267.1-D5	scaffold2689	101853	104849	-	CG-1 domain	-	PRGDB00189864	Hv.35067	Putative_R-Genes,_predicted_from_NCBI_UniGene	Hordeum vulgare	NL	Hordeum vulgare subsp. vulgare mRNA for predicted protein, complete cds, clone: NIASHv2089K17	3.43e-26	1
XP_014629388.1-D2	scaffold26888	4542	8647	+	Alpha amylase, catalytic domain;Carbohydrate-binding module 48 (Isoamylase N-terminal domain)	1,4-alpha-glucan-branching enzyme 2-1, chloroplastic/amyloplastic-like; K00700 1,4-alpha-glucan branching enzyme [EC:2.4.1.18]	PRGDB00202237	Bra017241	Putative_R-Genes,_predicted_from_Pythozome	Brassica rapa	N	--	0	1
XP_008345134.1-D443	scaffold2672	107408	110420	-	Leucine rich repeat;Leucine-rich repeat signature	hypothetical protein; K19613 leucine-rich repeat protein SHOC2	PRGDB00157907	Glyma05g26520.1	Putative_R-Genes,_predicted_from_Pythozome	Glycine max	RLP	Leucine-rich repeat transmembrane protein kinase (best arabidopsis hit)	2.5e-53	1
XP_012571113.1-D41	scaffold2670	102876	124926	+	Plant transposase (Ptta/En/Spm family)	putative disease resistance RPP13-like protein 1; K19613 leucine-rich repeat protein SHOC2	PRGDB00044663	Disease resistance protein	Putative_R-Genes,_collected_from_NCBI_Protein	Medicago truncatula	NL	Medicago truncatula chromosome 2 clone mth2-48e18, complete sequence.	1.47e-26	1
XP_004512416.1-D2	scaffold2667	227101	230185	+	Mob1/phocein family	hypothetical protein; K06685 MOB kinase activator 1	PRGDB00143314	492950	Putative_R-Genes,_predicted_from_Pythozome	Arabidopsis lyrata	NL	NB-ARC domain-containing disease resistance protein (best arabidopsis hit)	4.27e-135	1
XP_004508091.1	scaffold26617	12284	20938	+	ABC-2 type transporter;ABC transporter;ABC-transporter extracellular N-terminal;Plant PDR ABC transporter associated	ATP-binding cassette, sub-family G, member 2; K05681 ATP-binding cassette, subfamily G (WHITE), member 2	PRGDB00188669	Gma.34822	Putative_R-Genes,_predicted_from_NCBI_UniGene	Glycine max	N	PREDICTED: Glycine max pleiotropic drug resistance protein 3-like (LOC100779615), mRNA	0	1
NP_001242194.1	scaffold26474	163394	166276	-	FHA domain	NADH:cytochrome B5 reductase 1; K00326 cytochrome-b5 reductase [EC:1.6.2.2]	PRGDB00184503	GSVIVT01037444001	Putative_R-Genes,_predicted_from_Pythozome	Vitis vinifera	CNL	NB-ARC domain-containing disease resistance protein (best arabidopsis hit)	1.22e-54	1
NP_563882.1-D3	scaffold26431	8368	10739	+	Mlo family	MLO-like protein; K08472 mlo protein	PRGDB00192167	Mtr.3114	Putative_R-Genes,_predicted_from_NCBI_UniGene	Medicago truncatula	Mlo-like	Medicago truncatula MLO-like protein (MTR_2g006280) mRNA, complete cds	2.83e-127	1
XP_007150164.1-D2	scaffold26358	5604	9206	-	ABC-2 type transporter;ABC transporter	hypothetical protein; K05681 ATP-binding cassette, subfamily G (WHITE), member 2	PRGDB00188779	Gma.42211	Putative_R-Genes,_predicted_from_NCBI_UniGene	Glycine max	N	PREDICTED: Glycine max ABC transporter G family member 3-like (LOC100784041), mRNA	0	1
XP_007160390.1	scaffold2629	171831	179430	+	CHY zinc finger;Hemerythrin HHE cation binding domain;Ring finger domain;Zinc-ribbon	uncharacterized LOC100801725; K16276 zinc finger protein-like protein	PRGDB00184759	GRMZM2G312712_T02	Putative_R-Genes,_predicted_from_Pythozome	Zea mays	N	zinc finger protein-related (best arabidopsis hit); E3 ubiquitin ligase, putative, expressed (best rice hit)	0	1
XP_003551795.1	scaffold2612	111147	115177	+	Proline rich extensin signature;Protein tyrosine kinase	proline-rich receptor-like protein kinase PERK8; K04733 interleukin-1 receptor-associated kinase 4 [EC:2.7.11.1]	PRGDB00217566	Thhalv10011979m	Putative_R-Genes,_predicted_from_Pythozome	Eutrema halophilum	RLP	--	2.53e-124	1
XP_008390015.1-D33	scaffold2610	93485	97821	+	Reverse transcriptase (RNA-dependent DNA polymerase)	uncharacterized LOC104905624; K05658 ATP-binding cassette, subfamily B (MDR/TAP), member 1 [EC:3.6.3.44]	PRGDB00217533	Thhalv10011182m	Putative_R-Genes,_predicted_from_Pythozome	Eutrema halophilum	CN	--	3.6e-34	1
XP_006594504.1-D2	scaffold26019	7395	17835	+	Leucine rich repeat;Leucine Rich Repeat;Leucine-rich repeat signature	probable leucine-rich repeat receptor-like protein kinase At1g35710; K19613 leucine-rich repeat protein SHOC2	PRGWK00000028	MELO3C002740	Contributed_R-Genes	Cucumis melo	RLP	--	4.73e-151	1
NP_001238335.1-D2	scaffold2599	426064	435849	-	PITH domain;Serine hydroxymethyltransferase	hypothetical protein; K00600 glycine hydroxymethyltransferase [EC:2.1.2.1]	PRGDB00214085	MDP0000194411	Putative_R-Genes,_predicted_from_Pythozome	Malus x domestica	N	--	7.86e-29	1
XP_003534458.1	scaffold2580	16260	21049	+	Aldose 1-epimerase	aldose 1-epimerase-like; K01785 aldose 1-epimerase [EC:5.1.3.3]	PRGDB00183143	GSVIVT01011370001	Putative_R-Genes,_predicted_from_Pythozome	Vitis vinifera	RLP	Leucine-rich repeat receptor-like protein kinase family protein (best arabidopsis hit)	1.71e-156	1
XP_007146336.1-D363	scaffold2579	16726	17244	-	-	nodulin-26-like; K09874 aquaporin NIP	PRGDB00206841	LOC_Os04g53040.1	Putative_R-Genes,_predicted_from_Pythozome	Oryza sativa	NL	--	2.03e-30	1
XP_006607041.1-D224	scaffold2575	145552	145998	+	Reverse transcriptase (RNA-dependent DNA polymerase)	Myosin XI; K10357 myosin V	PRGDB00186672	--	Putative_R-Genes,_collected_from_NCBI_Protein	Arachis hypogaea	NL	Arachis hypogaea clone AHF-205D04 NBS-LRR gene cluster, complete sequence.	9.98e-48	1
XP_007157675.1	scaffold2571	135358	137653	-	Protein tyrosine kinase	protein kinase 2B, chloroplastic-like; K04733 interleukin-1 receptor-associated kinase 4 [EC:2.7.11.1]	PRGDB00207849	Aquca_027_00169.1	Putative_R-Genes,_predicted_from_Pythozome	Aquilegia coerulea	RLP	--	2.82e-162	1
XP_006576851.1	scaffold2555	26326	30773	-	Leucine rich repeat;Leucine rich repeat N-terminal domain;Protein kinase domain	Protein STRUBBELIG-RECEPTOR FAMILY; K04730 interleukin-1 receptor-associated kinase 1 [EC:2.7.11.1]	PRGDB00196430	Phvulv091002247m	Putative_R-Genes,_predicted_from_Pythozome	Phaseolus vulgaris	RLP	--	0	1
XP_008346412.1-D405	scaffold25532	8444	8933	-	-	Brassinosteroid receptor; K13415 protein brassinosteroid insensitive 1 [EC:2.7.10.1 2.7.11.1]	PRGDB00188739	Gma.39187	Putative_R-Genes,_predicted_from_NCBI_UniGene	Glycine max	RLP	PREDICTED: Glycine max probable LRR receptor-like serine	2.38e-32	1
XP_012574690.1-D4	scaffold25415	1288	1754	+	Protein tyrosine kinase	hypothetical protein; K04424 sterile alpha motif and leucine zipper containing kinase AZK [EC:2.7.11.25]	PRGWK00000005	MELO3C002125	Contributed_R-Genes	Cucumis melo	RLK	--	5.84e-41	1
XP_007150051.1-D3	scaffold2538	67	17096	-	-	protein phosphatase 1 regulatory subunit SDS22; K17550 protein phosphatase 1 regulatory subunit 7	PRGDB00184310	GSVIVT01034283001	Putative_R-Genes,_predicted_from_Pythozome	Vitis vinifera	NL	receptor like protein 14 (best arabidopsis hit)	1.99e-49	1
XP_002531725.1-D192	scaffold2523	724155	727413	-	Leucine rich repeat;Leucine-rich repeat signature	hypothetical protein; K13420 LRR receptor-like serine/threonine-protein kinase FLS2 [EC:2.7.11.1]	PRGWK00000203	MELO3C014614	Contributed_R-Genes	Cucumis melo	RLP	--	1.68e-102	1
XP_007148956.1	scaffold2520	236276	237106	-	SRR1	-	PRGDB00177710	30131.m007205	Putative_R-Genes,_predicted_from_Pythozome	Oryza barthii	NL	NB-ARC domain-containing disease resistance protein (best arabidopsis hit)	7.66e-45	1
XP_002533427.1-D34	scaffold2502	225941	232343	+	Cytochrome P450;E-class P450 group I signature;P450 superfamily signature;Protein kinase domain	probable inactive receptor kinase At2g26730; K04730 interleukin-1 receptor-associated kinase 1 [EC:2.7.11.1]	PRGDB00158505	Glyma06g19620.1	Putative_R-Genes,_predicted_from_Pythozome	Glycine max	RLP	Leucine-rich repeat protein kinase family protein (best arabidopsis hit)	0	1
XP_002526683.1-D364	scaffold2492	125613	126275	+	Leucine rich repeat	putative receptor-like protein kinase At3g47110; K13420 LRR receptor-like serine/threonine-protein kinase FLS2 [EC:2.7.11.1]	PRGDB00081292	Qro.7830	Putative_R-Genes,_predicted_from_NCBI_UniGene	Cucumis sativus	RLP	FP029426 LG0AAA Quercus robur cDNA clone LG0AAA16YK24RM1 similar to DR100_ARATH DNA-damage-repair	5.75e-115	1
XP_003551487.1	scaffold2485	155469	156723	-	Bacterial transferase hexapeptide (six repeats);Serine acetyltransferase, N-terminal	serine acetyltransferase 1, chloroplastic-like; K00640 serine O-acetyltransferase [EC:2.3.1.30]	PRGDB00216620	MDP0000287465	Putative_R-Genes,_predicted_from_Pythozome	Malus x domestica	N	--	7.33e-25	1
XP_004500306.1	scaffold248	73061	73672	+	Protein of unknown function (DUF640)	-	PRGDB00179296	Sb05g008160.1	Putative_R-Genes,_predicted_from_Pythozome	Sorghum bicolor	NL	MAP kinase kinase 5 (best arabidopsis hit); resistance protein, putative, expressed (best rice hit)	7.36e-73	1
XP_012574081.1	scaffold2476	71100	79770	-	Disease resistance protein signature;NB-ARC domain;TIR domain	hypothetical protein; K19613 leucine-rich repeat protein SHOC2	PRGDB00195075	Phvulv091001958m	Putative_R-Genes,_predicted_from_Pythozome	Phaseolus vulgaris	CNL	--	0	1
XP_007157320.1-D2	scaffold2473	69615	73023	-	Leucine rich repeat;Leucine rich repeat N-terminal domain;Protein tyrosine kinase	BRASSINOSTEROID INSENSITIVE 1-associated receptor kinase 1-like; K13416 brassinosteroid insensitive 1-associated receptor kinase 1 [EC:2.7.10.1 2.7.11.1]	PRGDB00188888	Gma.51279	Putative_R-Genes,_predicted_from_NCBI_UniGene	Glycine max	RLP	PREDICTED: Glycine max probable leucine-rich repeat receptor-like protein kinase At5g63930-like (LOC100779591), mRNA	0	1
XP_008377908.1-D271	scaffold2466	171459	171947	-	Disease resistance protein signature;NB-ARC domain	NBS-LRR type disease resistance protein; K13457 disease resistance protein RPM1	PRGDB00061652	NBS-LRR type disease resistance protein	Putative_R-Genes,_collected_from_NCBI_Protein	Glycine max	NL	Glycine max clone cw25 NBS-LRR type disease resistance protein mRNA, complete cds.	3.62e-83	1
XP_008375855.1-D140	scaffold2465	27270	28088	+	Endonuclease/Exonuclease/phosphatase family	Protein transport protein Sec24-like protein; K14007 protein transport protein SEC24	PRGDB00186672	--	Putative_R-Genes,_collected_from_NCBI_Protein	Arachis hypogaea	NL	Arachis hypogaea clone AHF-205D04 NBS-LRR gene cluster, complete sequence.	5.57e-131	1
XP_002524923.1-D32	scaffold2453	49387	50067	+	Leucine Rich Repeat	probable LRR receptor-like serine/threonine-protein kinase At4g08850-like; K04730 interleukin-1 receptor-associated kinase 1 [EC:2.7.11.1]	PRGDB00188694	Gma.36627	Putative_R-Genes,_predicted_from_NCBI_UniGene	Glycine max	RLP	PREDICTED: Glycine max receptor protein kinase-like protein At4g34220-like (LOC100820334), partial mRNA	1.35e-107	1
XP_006590663.1-D5	scaffold2423	270960	275710	+	Arabidopsis broad-spectrum mildew resistance protein RPW8;Disease resistance protein signature;NB-ARC domain	uncharacterized LOC103401427; K13415 protein brassinosteroid insensitive 1 [EC:2.7.10.1 2.7.11.1]	PRGDB00069333	Gma.53305	Putative_R-Genes,_predicted_from_NCBI_UniGene	Glycine max	CNL	GM89022B2H04.r1 Gm-r1089 Glycine max cDNA clone GM89022B2H04 3, mRNA sequence	4.6e-72	1
NP_188746.2	scaffold2408	125052	132360	-	ABC-2 type transporter;ABC transporter	hypothetical protein; K05681 ATP-binding cassette, subfamily G (WHITE), member 2	PRGDB00188395	Gma.16610	Putative_R-Genes,_predicted_from_NCBI_UniGene	Glycine max	N	PREDICTED: Glycine max ABC transporter G family member 15-like (LOC100777598), mRNA	0	1
XP_004494634.1	scaffold2406	113164	114276	-	Ring finger domain	RING finger protein; K10664 E3 ubiquitin-protein ligase ATL6/9/15/31/42/55 [EC:2.3.2.27]	PRGDB00191694	Lsa.50102	Putative_R-Genes,_predicted_from_NCBI_UniGene	Lactuca sativa	N	TSA: Lactuca sativa Letassy_X1_3887 mRNA sequence	1.62e-25	1
XP_002532618.1-D382	scaffold23982	13755	14357	-	Leucine rich repeat;Leucine rich repeat N-terminal domain	hypothetical protein; K13420 LRR receptor-like serine/threonine-protein kinase FLS2 [EC:2.7.11.1]	PRGDB00188406	Gma.17922	Putative_R-Genes,_predicted_from_NCBI_UniGene	Glycine max	RLP	PREDICTED: Glycine max probably inactive leucine-rich repeat receptor-like protein kinase At3g28040-like (LOC100813764), mRNA	1.66e-83	1
XP_004501294.1	scaffold2396	205450	215092	-	ABC-2 type transporter;ABC transporter;ABC-transporter extracellular N-terminal;Plant PDR ABC transporter associated	ppabcg30; ATP-binding cassette transporter, subfamily G, member 30, group WBC protein PpABCG30; K05681 ATP-binding cassette, subfamily G (WHITE), member 2	PRGDB00158277	Glyma06g07540.1	Putative_R-Genes,_predicted_from_Pythozome	Glycine max	N	pleiotropic drug resistance 12 (best arabidopsis hit)	0	1
XP_002517677.1-D6	scaffold2389	136954	184448	+	Leucine rich repeat;Leucine rich repeat N-terminal domain;Protein kinase domain	LRR receptor-like serine/threonine-protein kinase EFR; K13428 LRR receptor-like serine/threonine-protein kinase EFR [EC:2.7.11.1]	PRGDB00204957	Lus10030634	Putative_R-Genes,_predicted_from_Pythozome	Linum usitatissimum	RLP	--	9.35e-24	1
NP_176196.1-D15	scaffold23868	568	9556	+	ABC-2 type transporter;ABC transporter;ABC-transporter extracellular N-terminal;Plant PDR ABC transporter associated	ATP-binding cassette, sub-family G, member 2; K05681 ATP-binding cassette, subfamily G (WHITE), member 2	PRGDB00156830	Glyma03g32520.2	Putative_R-Genes,_predicted_from_Pythozome	Glycine max	CN	pleiotropic drug resistance 12 (best arabidopsis hit)	0	1
XP_006590663.1-D6	scaffold23847	39818	41388	-	-	TMV resistance protein N-like; K19613 leucine-rich repeat protein SHOC2	PRGDB00188684	Gma.36116	Putative_R-Genes,_predicted_from_NCBI_UniGene	Glycine max	CNL	PREDICTED: Glycine max probable disease resistance protein At5g66900-like (LOC100792590), mRNA	1.1e-141	1
XP_002519311.1-D25	scaffold2384	53072	53418	-	-	-	PRGDB00190414	Lsa.18449	Putative_R-Genes,_predicted_from_NCBI_UniGene	Lactuca sativa	N	TSA: Lactuca sativa Letassy_X1_769 mRNA sequence	3.51e-34	1
XP_006607041.1-D67	scaffold2377	112762	113394	-	Reverse transcriptase (RNA-dependent DNA polymerase)	Myosin XI; K10357 myosin V	PRGDB00186672	--	Putative_R-Genes,_collected_from_NCBI_Protein	Arachis hypogaea	NL	Arachis hypogaea clone AHF-205D04 NBS-LRR gene cluster, complete sequence.	2.61e-81	1
XP_014617136.1-D76	scaffold23734	1397	2524	+	Reverse transcriptase (RNA-dependent DNA polymerase)	uncharacterized LOC100245431; K05387 glutamate receptor, ionotropic, plant	PRGDB00206816	LOC_Os10g21950.1	Putative_R-Genes,_predicted_from_Pythozome	Oryza sativa	NL	--	8.54e-62	1
XP_003554024.1	scaffold2370	503224	514295	+	HEAT repeat;HEAT repeats;Interferon-related developmental regulator (IFRD)	kinesin-related protein 11-like; K11498 centromeric protein E	PRGDB00184310	GSVIVT01034283001	Putative_R-Genes,_predicted_from_Pythozome	Vitis vinifera	NL	receptor like protein 14 (best arabidopsis hit)	1.25e-66	1
XP_004505561.1	scaffold2358	8765	13338	-	Leucine rich repeat	hypothetical protein; K02984 small subunit ribosomal protein S3Ae	PRGWK00000863	Solyc07g053840.1.1	Contributed_R-Genes	Solanum lycopersicum	RLP	--	3.39e-175	1
NP_851120.1-D11	scaffold23364	15885	17613	+	Protein kinase domain	dynamin-related protein 5A-like; K01528 dynamin GTPase [EC:3.6.5.5]	PRGDB00196430	Phvulv091002247m	Putative_R-Genes,_predicted_from_Pythozome	Phaseolus vulgaris	RLP	--	1.7e-30	1
XP_012572898.1-D510	scaffold2306	165090	165533	+	Reverse transcriptase (RNA-dependent DNA polymerase)	hypothetical protein; K06228 fused [EC:2.7.11.1]	PRGDB00217533	Thhalv10011182m	Putative_R-Genes,_predicted_from_Pythozome	Eutrema halophilum	CN	--	6.78e-41	1
XP_004492078.1-D201	scaffold2305	101251	101646	-	-	uncharacterized LOC101300290; K17086 transmembrane 9 superfamily member 2/4	PRGDB00164261	Glyma16g23790.1	Putative_R-Genes,_predicted_from_Pythozome	Glycine max	CNL	transmembrane receptors;ATP binding (best arabidopsis hit)	1.21e-25	1
XP_008385358.1-D7	scaffold2285	335126	340106	+	-	protein TOPLESS-like; K14963 COMPASS component SWD3	PRGDB00050011	Os05g0240200	Putative_R-Genes,_collected_from_NCBI_Protein	Oryza sativa Japonica Group	NL	Oryza sativa (japonica cultivar-group) Os05g0240200 (Os05g0240200) mRNA, partial cds.	6.81e-22	1
NP_175957.1-D10	scaffold2278	138939	141860	+	Leucine rich repeat;Leucine Rich Repeat;Leucine-rich repeat signature;Protein kinase domain	brassinosteroid receptor; K13415 protein brassinosteroid insensitive 1 [EC:2.7.10.1 2.7.11.1]	PRGDB00068941	Gma.18897	Putative_R-Genes,_predicted_from_NCBI_UniGene	Glycine max	RLP	Glycine max clone cw130 leucine-rich repeat receptor-like kinase mRNA, complete cds	0	1
XP_002518580.1-D19	scaffold2277	115383	116690	-	-	ppabcg12; ATP-binding cassette transporter, subfamily G, member 12, group WBC protein PpABCG12; K05681 ATP-binding cassette, subfamily G (WHITE), member 2	PRGDB00194825	Phvulv091008534m	Putative_R-Genes,_predicted_from_Pythozome	Phaseolus vulgaris	N	--	2.64e-56	1
XP_014617136.1-D463	scaffold22618	60	497	-	Reverse transcriptase (RNA-dependent DNA polymerase)	uncharacterized LOC104905624; K05658 ATP-binding cassette, subfamily B (MDR/TAP), member 1 [EC:3.6.3.44]	PRGDB00047409	TIR-NBS-LRR-TIR type disease resistance protein	Putative_R-Genes,_collected_from_NCBI_Protein	Populus trichocarpa	TNL	Populus trichocarpa clone 110301 TIR-NBS-LRR-TIR type disease resistance protein mRNA, partial cds.	1.22e-48	1
XP_014622961.1	scaffold2261	79761	82436	-	WRKY DNA -binding domain	WRKY transcription factor 22; K13425 WRKY transcription factor 22	PRGDB00047400	TIR-NBS-TIR-TIR-WRKY type disease resistance protein	Putative_R-Genes,_collected_from_NCBI_Protein	Populus trichocarpa	TNL	Populus trichocarpa clone 196822 TIR-NBS-TIR-TIR-WRKY type disease resistance protein mRNA, complete cds.	1.9e-62	1
XP_006607041.1-D156	scaffold2248	6456	6902	+	Reverse transcriptase (RNA-dependent DNA polymerase)	Myosin XI; K10357 myosin V	PRGDB00186672	--	Putative_R-Genes,_collected_from_NCBI_Protein	Arachis hypogaea	NL	Arachis hypogaea clone AHF-205D04 NBS-LRR gene cluster, complete sequence.	3.68e-51	1
XP_004495593.1	scaffold2245	88389	92728	+	haloacid dehalogenase-like hydrolase;TENA/THI-4/PQQC family	hypothetical protein; K14153 hydroxymethylpyrimidine kinase / phosphomethylpyrimidine kinase / thiamine-phosphate diphosphorylase [EC:2.7.1.49 2.7.4.7 2.5.1.3]	PRGDB00079002	Vvi.22044	Putative_R-Genes,_predicted_from_NCBI_UniGene	Vitis vinifera	RLP	PREDICTED: Vitis vinifera hypothetical protein LOC100249779 (LOC100249779), mRNA	0	1
XP_003535477.1-D177	scaffold2237	17365	19428	+	Leucine rich repeat;Leucine Rich Repeat;Leucine-rich repeat signature;Protein kinase domain	Leucine-rich repeat protein kinase family protein, putative; K13420 LRR receptor-like serine/threonine-protein kinase FLS2 [EC:2.7.11.1]	PRGDB00157882	Glyma05g25640.1	Putative_R-Genes,_predicted_from_Pythozome	Glycine max	RLP	Leucine-rich repeat protein kinase family protein (best arabidopsis hit)	0	1
NP_173166.2-D28	scaffold22310	49218	52918	+	Leucine rich repeat;Leucine Rich Repeat;Leucine rich repeat N-terminal domain;Protein kinase domain	receptor protein kinase CLAVATA1; K00924	PRGDB00188765	Gma.40705	Putative_R-Genes,_predicted_from_NCBI_UniGene	Glycine max	RLP	PREDICTED: Glycine max leucine-rich repeat receptor-like protein kinase PXL2-like (LOC100788430), mRNA	0	1
XP_004489799.1-D5	scaffold22229	17871	20730	+	Hydroxymethylglutaryl-coenzyme A synthase C terminal;Hydroxymethylglutaryl-coenzyme A synthase N terminal;Protein tyrosine kinase	cysteine-rich receptor-like protein kinase 3; K04733 interleukin-1 receptor-associated kinase 4 [EC:2.7.11.1]	PRGDB00196615	Phvulv091025077m	Putative_R-Genes,_predicted_from_Pythozome	Phaseolus vulgaris	RLK-GNK2	--	0	1
XP_012570465.1	scaffold2219	154103	159054	+	Leucine rich repeat;Leucine Rich Repeat;Leucine rich repeat N-terminal domain;Protein tyrosine kinase	hypothetical protein; K04730 interleukin-1 receptor-associated kinase 1 [EC:2.7.11.1]	PRGDB00196662	Phvulv091021654m	Putative_R-Genes,_predicted_from_Pythozome	Phaseolus vulgaris	RLP	--	0	1
XP_002509635.1-D16	scaffold21990	223450	226658	-	Disease resistance protein signature;NB-ARC domain;TIR domain	Heat shock protein; K03283 heat shock 70kDa protein 1/8; K06758 L1 cell adhesion molecule like protein	PRGDB00162260	Glyma12g36880.1	Putative_R-Genes,_predicted_from_Pythozome	Glycine max	TNL	disease resistance protein (TIR-NBS-LRR class), putative (best arabidopsis hit)	0	1
NP_001276274.1-D56	scaffold21875	1561	4826	-	ABC transporter	hypothetical protein; K05681 ATP-binding cassette, subfamily G (WHITE), member 2	PRGDB00195562	Phvulv091025851m	Putative_R-Genes,_predicted_from_Pythozome	Phaseolus vulgaris	N	--	4.11e-91	1
XP_008339927.1-D5	scaffold2185	9292	23956	-	Plant protein of unknown function (DUF825);Protein tyrosine kinase	Protein kinase 2B; K04733 interleukin-1 receptor-associated kinase 4 [EC:2.7.11.1]	PRGDB00207849	Aquca_027_00169.1	Putative_R-Genes,_predicted_from_Pythozome	Aquilegia coerulea	RLP	--	1.58e-118	1
XP_008375855.1-D258	scaffold21646	18560	19296	-	Endonuclease/Exonuclease/phosphatase family	Protein transport protein Sec24-like protein; K14007 protein transport protein SEC24	PRGDB00186672	--	Putative_R-Genes,_collected_from_NCBI_Protein	Arachis hypogaea	NL	Arachis hypogaea clone AHF-205D04 NBS-LRR gene cluster, complete sequence.	2.45e-87	1
XP_007141403.1	scaffold2159	160714	162966	-	Protein of unknown function DUF260	hypothetical protein; K13945	PRGDB00213803	MDP0000322059	Putative_R-Genes,_predicted_from_Pythozome	Malus x domestica	RLP	--	2.89e-42	1
XP_014619260.1	scaffold2133	96375	99335	+	-	-	PRGDB00062428	tir-nbs resistance protein	Putative_R-Genes,_collected_from_NCBI_Protein	Populus trichocarpa	N	Populus trichocarpa linkage group III, whole genome shotgun sequence.	0	1
XP_012570563.1-D9	scaffold212	61381	62972	-	Reverse transcriptase (RNA-dependent DNA polymerase)	uncharacterized LOC104905624; K05658 ATP-binding cassette, subfamily B (MDR/TAP), member 1 [EC:3.6.3.44]	PRGDB00047409	TIR-NBS-LRR-TIR type disease resistance protein	Putative_R-Genes,_collected_from_NCBI_Protein	Populus trichocarpa	TNL	Populus trichocarpa clone 110301 TIR-NBS-LRR-TIR type disease resistance protein mRNA, partial cds.	7.1e-49	1
XP_003518760.1	scaffold21104	10458	14574	-	Leucine rich repeat;Leucine Rich repeats (2 copies)	LRR receptor-like serine/threonine-protein kinase FLS2-like; K13420 LRR receptor-like serine/threonine-protein kinase FLS2 [EC:2.7.11.1]	PRGWK00000401	Solyc01g011040.1.1	Contributed_R-Genes	Solanum lycopersicum	RLP	--	0	1
XP_004487518.1	scaffold2100	385661	390129	-	Protein kinase domain	hypothetical protein; K08286 protein-serine/threonine kinase [EC:2.7.11.-]	PRGDB00215446	MDP0000264975	Putative_R-Genes,_predicted_from_Pythozome	Malus x domestica	TNL	--	2.04e-53	1
XP_006606450.1	scaffold210	85765	86367	-	Protein of unknown function (DUF640)	-	PRGDB00179296	Sb05g008160.1	Putative_R-Genes,_predicted_from_Pythozome	Sorghum bicolor	NL	MAP kinase kinase 5 (best arabidopsis hit); resistance protein, putative, expressed (best rice hit)	1.29e-66	1
XP_006607041.1-D41	scaffold20966	4716	5348	-	Reverse transcriptase (RNA-dependent DNA polymerase)	Myosin XI; K10357 myosin V	PRGDB00186672	--	Putative_R-Genes,_collected_from_NCBI_Protein	Arachis hypogaea	NL	Arachis hypogaea clone AHF-205D04 NBS-LRR gene cluster, complete sequence.	5.79e-84	1
XP_002513042.1-D432	scaffold206	230672	245799	+	ArgJ family;Leucine rich repeat	arginine biosynthesis bifunctional protein ArgJ, chloroplastic-like; K00620 glutamate N-acetyltransferase / amino-acid N-acetyltransferase [EC:2.3.1.35 2.3.1.1]	PRGDB00164051	Glyma15g26330.1	Putative_R-Genes,_predicted_from_Pythozome	Glycine max	RLP	Leucine-rich repeat transmembrane protein kinase family protein (best arabidopsis hit)	2.49e-54	1
XP_003544671.1	scaffold2056	120627	127120	+	GAT domain;VHS domain	baculoviral IAP repeat-containing protein 6-like; K10581 ubiquitin-conjugating enzyme E2 O [EC:2.3.2.24]	PRGDB00216535	MDP0000279752	Putative_R-Genes,_predicted_from_Pythozome	Malus x domestica	N	--	1.41e-28	1
XP_002526114.1-D25	scaffold20503	20459	23534	-	Leucine rich repeat;Leucine Rich Repeat;Leucine rich repeat N-terminal domain;Leucine-rich repeat signature;Protein kinase domain	putative receptor-like protein kinase At3g47110; K13420 LRR receptor-like serine/threonine-protein kinase FLS2 [EC:2.7.11.1]	PRGDB00156173	Glyma02g36780.1	Putative_R-Genes,_predicted_from_Pythozome	Glycine max	RLP	Leucine-rich receptor-like protein kinase family protein (best arabidopsis hit)	0	1
XP_012571806.1	scaffold2038	77657	80949	+	Protein of unknown function (DUF1242)	-	PRGDB00177159	29929.m004678	Putative_R-Genes,_predicted_from_Pythozome	Oryza barthii	RLP	Leucine-rich repeat protein kinase family protein (best arabidopsis hit)	7.3e-27	1
XP_007135975.1	scaffold2036	222048	225458	-	Sugar (and other) transporter;Sugar transporter signature	probable inositol transporter 2-like; K08150 MFS transporter, SP family, solute carrier family 2 (myo-inositol transporter), member 13	PRGDB00216544	MDP0000286805	Putative_R-Genes,_predicted_from_Pythozome	Malus x domestica	TNL	--	1.78e-91	1
XP_007151753.1-D5	scaffold2022	98404	100306	+	Mlo family	MLO-like protein 2; K08472 mlo protein	PRGDB00071454	Mtr.22070	Putative_R-Genes,_predicted_from_NCBI_UniGene	Medicago truncatula	Mlo-like	EST507267 KV3 Medicago truncatula cDNA clone pKV3-46N4 5' end, mRNA sequence	6.27e-108	1
NP_001238112.1-D31	scaffold20205	37868	42747	+	Protein kinase domain;Wall-associated receptor kinase C-terminal	probable receptor-like protein kinase At1g67000-like; K04730 interleukin-1 receptor-associated kinase 1 [EC:2.7.11.1]	PRGDB00141957	AcoGoldSmith_v1.017924m	Putative_R-Genes,_predicted_from_Pythozome	Gossypium arboreum	RLP	Leucine-rich repeat receptor-like protein kinase family protein (best arabidopsis hit)	5.96e-141	1
XP_007148029.1-D10	scaffold201	380603	381621	+	Protein kinase domain	hypothetical protein; K14502 protein brassinosteroid insensitive 2 [EC:2.7.11.1]	PRGDB00215771	MDP0000180284	Putative_R-Genes,_predicted_from_Pythozome	Malus x domestica	RLP	--	2.78e-39	1
XP_002512662.1	scaffold20014	70068	82280	+	Ankyrin repeats (many copies);BAR domain of APPL family;HIV Rev interacting protein signature;PH domain;Protein kinase domain;Putative GTPase activating protein for Arf	ATP binding protein, putative; K12489 Arf-GAP with coiled-coil, ANK repeat and PH domain-containing protein	PRGDB00067968	Ccl.10467	Putative_R-Genes,_predicted_from_NCBI_UniGene	Citrus clementina	RLK	IC0AAA99DG07RM1 CitNFL Citrus clementina cDNA 5', mRNA sequence	3.69e-97	1
XP_008389338.1-D70	scaffold19970	3974	5990	-	-	ATP-binding cassette, sub-family G, member 2; K05681 ATP-binding cassette, subfamily G (WHITE), member 2	PRGDB00165200	Glyma19g35270.1	Putative_R-Genes,_predicted_from_Pythozome	Glycine max	N	pleiotropic drug resistance 12 (best arabidopsis hit)	1.41e-61	1
XP_004505667.1	scaffold1985	239687	244786	+	Aminotransferase class-III	gamma aminobutyrate transaminase 3, chloroplastic; K16871 4-aminobutyrate---pyruvate transaminase [EC:2.6.1.96]	PRGDB00146828	Bradi3g17760.2	Putative_R-Genes,_predicted_from_Pythozome	Ricinus communis	RLP	Pyridoxal phosphate (PLP)-dependent transferases superfamily protein (best arabidopsis hit); SHR5-receptor-like kinase, putative (best rice hit)	0	1
XP_002521135.1-D164	scaffold19694	14034	16154	-	Leucine rich repeat;Leucine Rich Repeat;Leucine rich repeat N-terminal domain;Leucine-rich repeat signature	LRR receptor-like serine/threonine-protein kinase FLS2; K13420 LRR receptor-like serine/threonine-protein kinase FLS2 [EC:2.7.11.1]	PRGWK00000159	MELO3C010073	Contributed_R-Genes	Cucumis melo	RLP	--	0	1
XP_014627557.1	scaffold1967	34306	39869	-	MA3 domain;MIF4G domain	nucleolar MIF4G domain-containing protein 1-like; K17583 nucleolar MIF4G domain-containing protein 1	PRGDB00200873	Bra023646	Putative_R-Genes,_predicted_from_Pythozome	Brassica rapa	CN	--	0	1
XP_002512766.1-D432	scaffold19474	52313	55726	-	-	LRR receptor-like serine/threonine-protein kinase FLS2; K13420 LRR receptor-like serine/threonine-protein kinase FLS2 [EC:2.7.11.1]	PRGDB00189109	Gma.62260	Putative_R-Genes,_predicted_from_NCBI_UniGene	Glycine max	RLP	PREDICTED: Glycine max probable LRR receptor-like serine	5.44e-119	1
XP_008372622.1-D17	scaffold19447	30	659	-	gag-polypeptide of LTR copia-type	myb-related protein Myb4-like; K09422 myb proto-oncogene protein, plant	PRGDB00215527	MDP0000553601	Putative_R-Genes,_predicted_from_Pythozome	Malus x domestica	TNL	--	1.75e-68	1
[truncated: 250 more rows]
